# Supplementary material
Source: publisher figshare collection journal article supplement (https://acs.figshare.com/ndownloader/files/3809743)
Supplement: Supplementary file 1 [file 3809743]

data_ca110413_0m
_audit_creation_date              2013-04-15
_audit_creation_method
;
  Olex2 1.2
  (compiled Apr  9 2013 14:10:59, GUI svn.r4458)
;
_publ_contact_author_address      ?
_publ_contact_author_email        ?
_publ_contact_author_name         ''
_publ_contact_author_phone        ?
_chemical_name_common             ?
_chemical_name_systematic
'(2S,3R,5R)-ethyl 5-chloro-3-hydroxy-2-(((4-nitrophenyl)sulfonyl)oxy)hexanoate'
_chemical_formula_moiety          'C14 H18 Cl N O8 S'
_chemical_formula_sum             'C14 H18 Cl N O8 S'
_chemical_formula_weight          395.80
_chemical_absolute_configuration  ad
_chemical_melting_point           ?
loop_
  _atom_type_symbol
  _atom_type_description
  _atom_type_scat_dispersion_real
  _atom_type_scat_dispersion_imag
  _atom_type_scat_source
 'C' 'C' 0.0033 0.0016 'International Tables Vol C Tables 4.2.6.8 and 6.1.1.4'
 'H' 'H' 0.0000 0.0000 'International Tables Vol C Tables 4.2.6.8 and 6.1.1.4'
 'N' 'N' 0.0061 0.0033 'International Tables Vol C Tables 4.2.6.8 and 6.1.1.4'
 'O' 'O' 0.0106 0.0060 'International Tables Vol C Tables 4.2.6.8 and 6.1.1.4'
 'S' 'S' 0.1246 0.1234 'International Tables Vol C Tables 4.2.6.8 and 6.1.1.4'
 'Cl' 'Cl' 0.1484 0.1585 'International Tables Vol C Tables 4.2.6.8 and 6.1.1.4'

_space_group_crystal_system       'orthorhombic'
_space_group_IT_number            19
_space_group_name_H-M_alt         'P 21 21 21'
_space_group_name_Hall            'P 2ac 2ab'
loop_
  _space_group_symop_operation_xyz
 'x, y, z'
 '-x+1/2, -y, z+1/2'
 'x+1/2, -y+1/2, -z'
 '-x, y+1/2, -z+1/2'

_cell_length_a                    6.1403(10)
_cell_length_b                    13.657(3)
_cell_length_c                    20.719(4)
_cell_angle_alpha                 90
_cell_angle_beta                  90
_cell_angle_gamma                 90
_cell_volume                      1737.4(5)
_cell_formula_units_Z             4
_cell_measurement_reflns_used     3003
_cell_measurement_temperature     100(2)
_cell_measurement_theta_max       24.82
_cell_measurement_theta_min       2.47
_exptl_absorpt_coefficient_mu     0.383
_exptl_absorpt_correction_T_max   0.7456
_exptl_absorpt_correction_T_min   0.6707
_exptl_absorpt_correction_type    multi-scan
_exptl_absorpt_process_details
;
SADABS-2008/1 (Bruker,2008) was used for absorption correction.
wR2(int) was 0.0443 before and 0.0381 after correction.
The Ratio of minimum to maximum transmission is 0.8995.
The \l/2 correction factor is 0.0000.
;
_exptl_crystal_colour             colourless
_exptl_crystal_colour_primary     colourless
_exptl_crystal_density_diffrn     1.513
_exptl_crystal_density_meas       .
_exptl_crystal_density_method     ?
_exptl_crystal_description        needle
_exptl_crystal_F_000              824
_exptl_crystal_recrystallization_method
'crystallized from a dichloromethane/hexane mixture'
_exptl_crystal_size_max           0.4
_exptl_crystal_size_mid           0.06
_exptl_crystal_size_min           0.02
_exptl_special_details
;
 ?
;
_exptl_transmission_factor_max    ?
_exptl_transmission_factor_min    ?
_diffrn_reflns_av_R_equivalents   0.0520
_diffrn_reflns_av_unetI/netI      0.0663
_diffrn_reflns_Laue_measured_fraction_full 0.998
_diffrn_reflns_Laue_measured_fraction_max 0.998
_diffrn_reflns_limit_h_max        7
_diffrn_reflns_limit_h_min        -7
_diffrn_reflns_limit_k_max        17
_diffrn_reflns_limit_k_min        -15
_diffrn_reflns_limit_l_max        26
_diffrn_reflns_limit_l_min        -26
_diffrn_reflns_number             12689
_diffrn_reflns_point_group_measured_fraction_full 0.999
_diffrn_reflns_point_group_measured_fraction_max 0.996
_diffrn_reflns_theta_full         25.242
_diffrn_reflns_theta_max          27.492
_diffrn_reflns_theta_min          1.786
_diffrn_ambient_temperature       100.04
_diffrn_detector_area_resol_mean  ?
_diffrn_measured_fraction_theta_full 0.998
_diffrn_measured_fraction_theta_max 0.998
_diffrn_measurement_device_type   'Bruker APEX-II CCD'
_diffrn_measurement_method        '\f and \w scans'
_diffrn_radiation_monochromator   graphite
_diffrn_radiation_type            MoK\a
_diffrn_radiation_wavelength      0.71073
_diffrn_source                    ?
_diffrn_standards_number          0
_reflns_Friedel_coverage          0.726
_reflns_Friedel_fraction_full     1.000
_reflns_Friedel_fraction_max      0.993
_reflns_number_gt                 3078
_reflns_number_total              3963
_reflns_special_details
;
 Reflections were merged by SHELXL according to the crystal
 class for the calculation of statistics and refinement.
 
 _reflns_Friedel_fraction is defined as the number of unique
 Friedel pairs measured divided by the number that would be
 possible theoretically, ignoring centric projections and
 systematic absences.
;
_reflns_threshold_expression      'I > 2\s(I)'
_computing_cell_refinement        ?
_computing_data_collection        ?
_computing_data_reduction         'SAINT v7.68A (Bruker, 2009)'
_computing_molecular_graphics
;
O. V. Dolomanov, L. J. Bourhis, R. J. Gildea, J. A. K. Howard and H. Puschmann,
OLEX2: a complete structure solution, refinement and analysis program.
J. Appl. Cryst. (2009). 42, 339-341.
;
_computing_publication_material
;
O. V. Dolomanov, L. J. Bourhis, R. J. Gildea, J. A. K. Howard and H. Puschmann,
OLEX2: a complete structure solution, refinement and analysis program.
J. Appl. Cryst. (2009). 42, 339-341.
;
_computing_structure_refinement
;
SHELXL, G.M. Sheldrick, Acta Cryst.
(2008). A64, 112-122
;
_computing_structure_solution
;
SHELXS, G.M. Sheldrick, Acta Cryst.
(2008). A64, 112-122
;
_refine_diff_density_max          0.209
_refine_diff_density_min          -0.376
_refine_diff_density_rms          0.059
_refine_ls_abs_structure_details
;
 Flack x determined using 1054 quotients [(I+)-(I-)]/[(I+)+(I-)]
 (Parsons and Flack (2004), Acta Cryst. A60, s61).
;
_refine_ls_abs_structure_Flack    0.09(4)
_refine_ls_extinction_coef        .
_refine_ls_extinction_method      none
_refine_ls_goodness_of_fit_ref    1.022
_refine_ls_hydrogen_treatment     constr
_refine_ls_matrix_type            full
_refine_ls_number_parameters      229
_refine_ls_number_reflns          3963
_refine_ls_number_restraints      0
_refine_ls_R_factor_all           0.0649
_refine_ls_R_factor_gt            0.0403
_refine_ls_restrained_S_all       1.022
_refine_ls_shift/su_max           0.001
_refine_ls_shift/su_mean          0.000
_refine_ls_structure_factor_coef  Fsqd
_refine_ls_weighting_details
;
 w=1/[\s^2^(Fo^2^)+(0.0329P)^2^+0.1917P]
 where P=(Fo^2^+2Fc^2^)/3
;
_refine_ls_weighting_scheme       calc
_refine_ls_wR_factor_gt           0.0738
_refine_ls_wR_factor_ref          0.0828
_refine_special_details
;
 ?
;
_olex2_refinement_description
;
1. Fixed Uiso
 At 1.2 times of:
  All C(H) groups, All C(H,H) groups
 At 1.5 times of:
  All C(H,H,H) groups, All O(H) groups
2.a Ternary CH refined with riding coordinates:
 C7(H7), C9(H9), C11(H11)
2.b Secondary CH2 refined with riding coordinates:
 C10(H10A,H10B), C13(H13A,H13B)
2.c Aromatic/amide H refined with riding coordinates:
 C2(H2), C3(H3), C5(H5), C6(H6)
2.d Idealised Me refined as rotating group:
 C12(H12A,H12B,H12C), C14(H14A,H14B,H14C)
2.e Idealised tetrahedral OH refined as rotating group:
 O8(H8)
;
_atom_sites_solution_hydrogens    geom
_atom_sites_solution_primary      direct
_atom_sites_solution_secondary    ?
loop_
  _atom_site_label
  _atom_site_type_symbol
  _atom_site_fract_x
  _atom_site_fract_y
  _atom_site_fract_z
  _atom_site_U_iso_or_equiv
  _atom_site_adp_type
  _atom_site_occupancy
  _atom_site_site_symmetry_order
  _atom_site_calc_flag
  _atom_site_refinement_flags_posn
  _atom_site_refinement_flags_adp
  _atom_site_refinement_flags_occupancy
  _atom_site_disorder_assembly
  _atom_site_disorder_group
 Cl1 Cl 0.33529(16) 0.55247(8) 0.59184(4) 0.0320(3) Uani 1 1 d . . . . .
 S1 S 0.43562(14) 0.53963(7) 0.32898(4) 0.0210(2) Uani 1 1 d . . . . .
 O1 O 0.9129(4) 0.2281(2) 0.13146(12) 0.0383(8) Uani 1 1 d . . . . .
 O2 O 1.1378(5) 0.2210(3) 0.21135(15) 0.0481(9) Uani 1 1 d . . . . .
 O3 O 0.2998(4) 0.5883(2) 0.28348(12) 0.0310(7) Uani 1 1 d . . . . .
 O4 O 0.5655(4) 0.59225(19) 0.37389(12) 0.0279(6) Uani 1 1 d . . . . .
 O5 O 0.2723(3) 0.47214(18) 0.36800(10) 0.0173(6) Uani 1 1 d . . . . .
 O6 O 0.4773(4) 0.2772(2) 0.46621(12) 0.0292(7) Uani 1 1 d . . . . .
 O7 O 0.3783(4) 0.28818(18) 0.36158(11) 0.0238(6) Uani 1 1 d . . . . .
 O8 O -0.0303(4) 0.3801(2) 0.44770(12) 0.0253(6) Uani 1 1 d . . . . .
 H8 H -0.0624 0.3335 0.4724 0.038 Uiso 1 1 calc R U . . .
 N1 N 0.9733(5) 0.2511(3) 0.18563(15) 0.0319(9) Uani 1 1 d . . . . .
 C1 C 0.5977(5) 0.4551(3) 0.28637(16) 0.0187(7) Uani 1 1 d . . . . .
 C2 C 0.8030(6) 0.4341(3) 0.30808(17) 0.0252(9) Uani 1 1 d . . . . .
 H2 H 0.8603 0.4665 0.3449 0.030 Uiso 1 1 calc R U . . .
 C3 C 0.9260(6) 0.3649(3) 0.27568(18) 0.0277(9) Uani 1 1 d . . . . .
 H3 H 1.0675 0.3477 0.2904 0.033 Uiso 1 1 calc R U . . .
 C4 C 0.8379(6) 0.3215(3) 0.22141(17) 0.0224(8) Uani 1 1 d . . . . .
 C5 C 0.6320(6) 0.3417(3) 0.19951(16) 0.0260(9) Uani 1 1 d . . . . .
 H5 H 0.5751 0.3096 0.1625 0.031 Uiso 1 1 calc R U . . .
 C6 C 0.5096(6) 0.4099(3) 0.23263(16) 0.0244(9) Uani 1 1 d . . . . .
 H6 H 0.3664 0.4256 0.2187 0.029 Uiso 1 1 calc R U . . .
 C7 C 0.3395(6) 0.4285(3) 0.42852(15) 0.0182(8) Uani 1 1 d . . . . .
 H7 H 0.4639 0.4667 0.4469 0.022 Uiso 1 1 calc R U . . .
 C8 C 0.4071(6) 0.3226(3) 0.42012(17) 0.0215(8) Uani 1 1 d . . . . .
 C9 C 0.1450(6) 0.4341(3) 0.47455(15) 0.0193(8) Uani 1 1 d . . . . .
 H9 H 0.1871 0.4034 0.5165 0.023 Uiso 1 1 calc R U . . .
 C10 C 0.0687(6) 0.5379(3) 0.48740(16) 0.0201(7) Uani 1 1 d . . . . .
 H10A H 0.0196 0.5665 0.4460 0.024 Uiso 1 1 calc R U . . .
 H10B H -0.0598 0.5347 0.5162 0.024 Uiso 1 1 calc R U . . .
 C11 C 0.2317(6) 0.6070(3) 0.51716(16) 0.0215(8) Uani 1 1 d . . . . .
 H11 H 0.3558 0.6159 0.4865 0.026 Uiso 1 1 calc R U . . .
 C12 C 0.1370(6) 0.7061(3) 0.53266(17) 0.0248(9) Uani 1 1 d . . . . .
 H12A H 0.0021 0.6978 0.5573 0.037 Uiso 1 1 calc R U . . .
 H12B H 0.1055 0.7412 0.4925 0.037 Uiso 1 1 calc R U . . .
 H12C H 0.2418 0.7438 0.5583 0.037 Uiso 1 1 calc R U . . .
 C13 C 0.4353(7) 0.1850(3) 0.3503(2) 0.0341(10) Uani 1 1 d . . . . .
 H13A H 0.5649 0.1675 0.3763 0.041 Uiso 1 1 calc R U . . .
 H13B H 0.4717 0.1753 0.3042 0.041 Uiso 1 1 calc R U . . .
 C14 C 0.2476(8) 0.1197(3) 0.3685(2) 0.0461(13) Uani 1 1 d . . . . .
 H14A H 0.1207 0.1359 0.3419 0.069 Uiso 1 1 calc R U . . .
 H14B H 0.2118 0.1294 0.4142 0.069 Uiso 1 1 calc R U . . .
 H14C H 0.2881 0.0511 0.3613 0.069 Uiso 1 1 calc R U . . .

loop_
  _atom_site_aniso_label
  _atom_site_aniso_U_11
  _atom_site_aniso_U_22
  _atom_site_aniso_U_33
  _atom_site_aniso_U_23
  _atom_site_aniso_U_13
  _atom_site_aniso_U_12
 Cl1 0.0384(5) 0.0330(6) 0.0248(5) -0.0037(5) -0.0109(4) 0.0087(5)
 S1 0.0255(5) 0.0167(5) 0.0208(4) 0.0038(4) 0.0064(4) -0.0002(4)
 O1 0.0494(17) 0.0395(19) 0.0259(14) -0.0168(14) 0.0159(14) -0.0172(16)
 O2 0.0245(15) 0.055(2) 0.065(2) -0.0331(19) 0.0019(16) 0.0078(15)
 O3 0.0385(16) 0.0285(17) 0.0259(13) 0.0149(13) 0.0091(13) 0.0131(13)
 O4 0.0312(14) 0.0211(15) 0.0312(14) -0.0067(12) 0.0110(13) -0.0092(13)
 O5 0.0166(11) 0.0202(15) 0.0150(11) 0.0037(11) -0.0007(9) -0.0011(11)
 O6 0.0316(15) 0.0251(16) 0.0307(14) 0.0105(13) 0.0002(12) 0.0051(13)
 O7 0.0332(15) 0.0132(14) 0.0248(13) 0.0004(11) 0.0071(11) 0.0013(12)
 O8 0.0277(14) 0.0230(16) 0.0252(14) 0.0057(12) 0.0029(12) -0.0089(12)
 N1 0.0297(19) 0.032(2) 0.034(2) -0.0148(16) 0.0165(16) -0.0099(16)
 C1 0.0188(17) 0.0184(19) 0.0188(16) 0.0007(17) 0.0063(13) -0.0039(16)
 C2 0.0249(19) 0.028(2) 0.0225(17) -0.0075(17) -0.0005(15) -0.0038(17)
 C3 0.0199(18) 0.032(2) 0.031(2) -0.0125(18) -0.0006(18) 0.0011(18)
 C4 0.0215(17) 0.022(2) 0.0233(18) -0.0045(16) 0.0071(16) -0.0055(17)
 C5 0.032(2) 0.035(2) 0.0108(16) -0.0055(17) 0.0007(16) -0.0067(18)
 C6 0.0215(19) 0.033(3) 0.0183(18) 0.0008(17) -0.0012(15) -0.0020(17)
 C7 0.0208(17) 0.015(2) 0.0189(17) 0.0043(15) -0.0006(15) 0.0000(15)
 C8 0.0182(18) 0.021(2) 0.0253(19) 0.0029(17) 0.0050(15) -0.0028(16)
 C9 0.0246(18) 0.018(2) 0.0150(16) 0.0044(15) 0.0023(15) -0.0013(16)
 C10 0.0220(16) 0.021(2) 0.0176(16) 0.0004(16) 0.0034(15) 0.0019(18)
 C11 0.0256(19) 0.025(2) 0.0139(16) 0.0028(16) -0.0015(15) 0.0011(17)
 C12 0.029(2) 0.022(2) 0.0233(19) -0.0045(17) 0.0008(16) 0.0025(18)
 C13 0.050(2) 0.015(2) 0.037(2) -0.0006(17) 0.017(2) 0.007(2)
 C14 0.065(3) 0.022(3) 0.051(3) -0.007(2) 0.020(3) -0.007(2)

_geom_special_details
;
 All esds (except the esd in the dihedral angle between two l.s. planes)
 are estimated using the full covariance matrix.  The cell esds are taken
 into account individually in the estimation of esds in distances, angles
 and torsion angles; correlations between esds in cell parameters are only
 used when they are defined by crystal symmetry.  An approximate (isotropic)
 treatment of cell esds is used for estimating esds involving l.s. planes.
;
loop_
  _geom_bond_atom_site_label_1
  _geom_bond_atom_site_label_2
  _geom_bond_distance
  _geom_bond_site_symmetry_2
  _geom_bond_publ_flag
 Cl1 C11 1.831(4) . ?
 S1 O3 1.424(3) . ?
 S1 O4 1.420(3) . ?
 S1 O5 1.584(2) . ?
 S1 C1 1.761(4) . ?
 O1 N1 1.223(4) . ?
 O2 N1 1.214(4) . ?
 O5 C7 1.448(4) . ?
 O6 C8 1.217(4) . ?
 O7 C8 1.313(4) . ?
 O7 C13 1.471(4) . ?
 O8 C9 1.418(4) . ?
 N1 C4 1.471(5) . ?
 C1 C2 1.369(5) . ?
 C1 C6 1.383(5) . ?
 C2 C3 1.383(5) . ?
 C3 C4 1.381(5) . ?
 C4 C5 1.372(5) . ?
 C5 C6 1.379(5) . ?
 C7 C8 1.515(5) . ?
 C7 C9 1.531(5) . ?
 C9 C10 1.517(5) . ?
 C10 C11 1.507(5) . ?
 C11 C12 1.507(5) . ?
 C13 C14 1.506(6) . ?

loop_
  _geom_angle_atom_site_label_1
  _geom_angle_atom_site_label_2
  _geom_angle_atom_site_label_3
  _geom_angle
  _geom_angle_site_symmetry_1
  _geom_angle_site_symmetry_3
  _geom_angle_publ_flag
 O3 S1 O5 103.83(14) . . ?
 O3 S1 C1 107.78(16) . . ?
 O4 S1 O3 121.74(17) . . ?
 O4 S1 O5 108.39(14) . . ?
 O4 S1 C1 110.05(16) . . ?
 O5 S1 C1 103.42(15) . . ?
 C7 O5 S1 120.0(2) . . ?
 C8 O7 C13 117.3(3) . . ?
 O1 N1 C4 117.3(4) . . ?
 O2 N1 O1 124.6(3) . . ?
 O2 N1 C4 118.1(3) . . ?
 C2 C1 S1 119.5(3) . . ?
 C2 C1 C6 122.0(3) . . ?
 C6 C1 S1 118.4(3) . . ?
 C1 C2 C3 119.1(3) . . ?
 C4 C3 C2 118.3(4) . . ?
 C3 C4 N1 118.0(3) . . ?
 C5 C4 N1 119.1(3) . . ?
 C5 C4 C3 123.0(4) . . ?
 C4 C5 C6 118.3(3) . . ?
 C5 C6 C1 119.3(3) . . ?
 O5 C7 C8 111.8(3) . . ?
 O5 C7 C9 107.2(3) . . ?
 C8 C7 C9 109.4(3) . . ?
 O6 C8 O7 126.1(4) . . ?
 O6 C8 C7 119.6(3) . . ?
 O7 C8 C7 114.3(3) . . ?
 O8 C9 C7 108.8(3) . . ?
 O8 C9 C10 108.7(3) . . ?
 C10 C9 C7 113.4(3) . . ?
 C11 C10 C9 116.9(3) . . ?
 C10 C11 Cl1 108.7(3) . . ?
 C10 C11 C12 113.1(3) . . ?
 C12 C11 Cl1 108.6(2) . . ?
 O7 C13 C14 110.2(3) . . ?

_shelx_estimated_absorpt_T_max    0.992
_shelx_estimated_absorpt_T_min    0.862
_shelx_hkl_checksum               88028
_shelx_hkl_file
;
  -1   0   0    0.12    0.28
  -1   0   0   -0.05    0.46
  -1   0   0   -0.20    0.29
   1   0   0    0.08    0.52
  -2   0   0  119.42    3.38
  -2   0   0  124.68    2.72
  -2   0   0  120.42    2.71
   2   0   0  119.39    3.37
  -3   0   0    0.33    0.59
  -3   0   0   -0.28    1.01
  -3   0   0    0.25    0.59
   3   0   0   -0.25    0.96
  -4   0   0   39.05    1.42
  -4   0   0   36.28    1.92
  -4   0   0   36.31    1.39
   4   0   0   32.42    2.21
  -5   0   0   -0.15    1.15
  -5   0   0    1.50    0.83
   5   0   0    0.72    1.35
  -6   0   0    0.80    1.33
  -7   0   0    0.80    1.48
  -7   1   0    2.21    1.51
  -6   1   0    8.34    1.60
  -5   1   0    1.85    0.77
   4  -1   0   76.59    2.96
  -4   1   0   75.87    2.03
   3  -1   0    2.95    1.11
  -3   1   0    3.32    1.11
  -3   1   0    2.01    0.56
   2  -1   0  174.00    4.47
  -2   1   0  174.30    4.47
  -2   1   0  170.26    3.70
  -1   1   0  426.30    9.55
  -1   1   0  420.84    8.67
   0   1   0    0.16    0.16
  -1  -1   0  418.53    8.74
  -1  -1   0  423.95    8.12
   1   1   0  429.35    8.74
   1   1   0  419.19    9.51
   1   1   0  424.62    8.73
  -2  -1   0  172.35    4.38
  -2  -1   0  170.72    3.79
   2   1   0  170.75    3.72
   2   1   0  169.28    4.38
  -3  -1   0    4.21    0.97
  -3  -1   0    3.37    0.71
  -3  -1   0    4.04    1.13
  -3  -1   0    2.57    0.68
   3   1   0    4.01    1.08
  -4  -1   0   78.81    2.61
  -4  -1   0   78.10    2.21
  -4  -1   0   77.60    2.22
   4   1   0   76.61    2.96
  -5  -1   0    1.74    0.81
  -5  -1   0    0.99    0.87
  -5  -1   0    1.02    1.09
   5   1   0    0.64    1.31
  -6  -1   0    6.42    1.53
  -6  -1   0    8.57    1.16
   6   1   0   10.98    1.91
  -7  -1   0    2.83    1.59
  -7   2   0    7.39    1.75
  -6   2   0    3.17    1.45
  -5   2   0    5.26    0.79
  -4   2   0   11.24    0.91
  -3   2   0   -0.42    0.54
  -3   2   0    1.47    0.93
  -2   2   0  163.42    4.37
  -2   2   0  164.06    3.60
   1  -2   0   74.98    1.87
  -1   2   0   77.55    1.88
   0  -2   0   71.30    1.76
   0   2   0   71.72    1.79
   0   2   0   71.13    1.75
  -1  -2   0   76.47    1.98
  -1  -2   0   72.78    1.97
   1   2   0   74.36    1.80
   1   2   0   76.72    1.99
   1   2   0   75.07    2.00
  -2  -2   0  156.48    3.52
  -2  -2   0  158.94    3.69
  -2  -2   0  161.23    3.68
   2   2   0  162.75    4.19
   2   2   0  155.41    3.56
   2   2   0  164.01    3.65
   2   2   0  153.57    3.62
  -3  -2   0    1.32    0.73
  -3  -2   0    1.03    0.86
   3   2   0    0.47    1.00
   3   2   0    0.30    0.61
  -4  -2   0   10.73    1.01
  -4  -2   0   13.22    1.27
  -4  -2   0    9.36    0.95
   4   2   0   11.00    1.43
  -5  -2   0    6.18    0.98
  -5  -2   0    6.15    1.06
  -5  -2   0    2.25    1.19
   5   2   0    7.35    1.56
  -6  -2   0    3.97    1.16
  -6  -2   0    7.59    1.48
   6   2   0    4.53    1.71
  -7  -2   0    9.44    1.73
  -7  -2   0    7.04    1.35
   7   2   0    8.26    2.06
  -7   3   0   12.64    1.98
  -4   3   0    2.61    0.67
  -3   3   0   12.28    0.84
  -3   3   0   14.00    1.32
   2  -3   0  228.71    4.97
  -2   3   0  234.33    5.06
   1  -3   0  261.48    5.63
  -1   3   0  260.04    5.65
   0  -3   0    0.13    0.62
   0   3   0   -0.20    0.63
   0   3   0   -0.32    0.67
  -1  -3   0  260.12    5.72
  -1  -3   0  257.67    5.72
   1   3   0  261.67    5.72
   1   3   0  259.04    5.70
  -2  -3   0  229.05    5.20
  -2  -3   0  228.41    5.20
   2   3   0  230.35    4.86
   2   3   0  226.75    5.15
   2   3   0  230.94    5.17
  -3  -3   0   12.51    1.12
  -3  -3   0   11.79    1.08
  -3  -3   0   13.06    1.05
   3   3   0   11.69    0.98
   3   3   0   15.70    1.39
  -4  -3   0    2.50    0.91
  -4  -3   0    1.90    0.86
  -4  -3   0    2.00    0.98
   4   3   0    2.15    1.17
  -5  -3   0    8.22    1.22
  -5  -3   0    8.00    1.31
   5   3   0    8.96    1.65
  -6  -3   0    1.58    1.18
  -6  -3   0    2.42    1.34
   6   3   0    1.36    1.61
  -7  -3   0    7.97    1.75
  -7  -3   0   11.93    1.49
   7   3   0    9.15    2.17
  -5   4   0    3.23    0.79
  -4   4   0   12.44    0.93
  -3   4   0  109.78    2.80
   2  -4   0   26.15    1.34
  -2   4   0   27.18    1.39
   1  -4   0  382.77    8.20
  -1   4   0  383.28    8.23
   0  -4   0   37.30    1.64
   0   4   0   36.51    1.59
   0   4   0   38.80    1.61
  -1  -4   0  381.43    8.19
  -1  -4   0  369.55    8.19
   1   4   0  379.24    8.21
   1   4   0  380.08    8.19
  -2  -4   0   26.29    1.59
  -2  -4   0   24.99    1.49
   2   4   0   23.94    1.55
   2   4   0   24.62    1.38
  -3  -4   0  114.16    3.14
  -3  -4   0  115.06    3.16
   3   4   0  116.68    3.60
   3   4   0  112.27    3.05
   3   4   0  113.78    3.05
  -4  -4   0   12.62    1.23
  -4  -4   0   10.66    1.21
  -4  -4   0   11.97    1.17
   4   4   0   12.96    1.53
   4   4   0   11.35    1.05
  -5  -4   0    2.98    1.19
  -5  -4   0    3.35    1.19
   5   4   0    5.09    1.51
  -6  -4   0    2.10    1.33
  -6  -4   0    0.36    1.28
   6   4   0    0.06    1.57
  -7  -4   0    0.24    1.38
  -7  -4   0   -1.93    1.38
   7   4   0    2.48    1.83
  -6   5   0    0.44    0.85
  -5   5   0   45.77    1.77
  -4   5   0    2.27    0.80
   3  -5   0   78.56    2.11
  -3   5   0   75.61    2.26
   2  -5   0   68.50    2.15
  -2   5   0   69.40    2.18
   1  -5   0    6.27    0.91
  -1   5   0    5.02    0.95
   0  -5   0    0.56    0.78
   0   5   0   -0.85    0.76
   0   5   0   -0.39    0.86
  -1  -5   0    3.03    0.94
  -1  -5   0    4.20    0.94
   1   5   0    4.52    0.99
  -2  -5   0   65.05    2.35
  -2  -5   0   67.28    2.30
   2   5   0   66.46    2.06
   2   5   0   67.24    2.33
  -3  -5   0   81.43    2.67
  -3  -5   0   86.07    2.67
   3   5   0   75.41    2.39
   3   5   0   81.80    2.58
  -4  -5   0    0.44    0.94
  -4  -5   0    0.65    1.07
   4   5   0    1.93    0.90
   4   5   0    1.91    1.24
  -5  -5   0   51.70    2.40
   5   5   0   50.90    2.77
  -6  -5   0   -0.53    1.32
   6   5   0   -0.49    1.58
  -7  -5   0   -1.88    1.38
   7   5   0    0.85    1.84
  -6   6   0   14.10    1.19
  -5   6   0    7.74    1.08
  -4   6   0    3.08    0.92
  -3   6   0   14.11    1.16
  -2   6   0   -0.06    0.86
  -1   6   0  105.80    3.05
   0   6   0  367.88    8.23
   1   6   0  112.66    3.28
  -2  -6   0   -0.71    0.99
   2   6   0   -0.38    1.02
  -3  -6   0   15.15    1.38
   3   6   0   14.75    1.37
   3   6   0   13.68    1.16
  -4  -6   0    2.61    1.19
   4   6   0    4.07    1.12
   4   6   0    2.93    1.31
  -5  -6   0    6.71    1.43
   5   6   0    9.47    1.73
  -6  -6   0   13.16    1.73
   6   6   0   14.70    2.07
   7   6   0    2.57    2.01
  -6   7   0    4.80    1.11
  -5   7   0    8.59    1.19
  -4   7   0   44.09    2.00
  -3   7   0   31.09    1.73
  -2   7   0   51.03    2.08
  -1   7   0  163.26    4.28
   0   7   0    0.10    1.05
   1   7   0  156.63    4.22
  -2  -7   0   50.30    2.17
   2   7   0   50.67    2.23
  -3  -7   0   29.06    1.91
   3   7   0   27.83    1.89
   3   7   0   29.65    1.69
  -4  -7   0   42.52    2.30
   4   7   0   46.74    2.22
   4   7   0   45.84    2.60
  -5  -7   0    9.24    1.60
   5   7   0    9.11    1.88
  -6  -7   0    3.81    1.59
   6   7   0    3.64    1.84
   7   7   0    2.75    1.87
  -6   8   0    5.08    1.22
  -5   8   0    0.22    1.06
  -4   8   0   74.43    2.67
  -3   8   0    0.23    0.99
  -2   8   0    9.25    1.21
  -1   8   0  104.93    3.25
   0   8   0  163.20    4.41
   1   8   0  107.79    3.34
   2   8   0   10.57    1.45
  -3  -8   0   -0.28    1.17
   3   8   0   -0.29    0.80
   3   8   0    0.82    1.28
  -4  -8   0   76.80    2.99
   4   8   0   71.84    2.83
  -5  -8   0    0.19    1.43
   5   8   0   -1.27    1.54
   6   8   0    2.35    1.84
   7   8   0    5.34    2.11
  -6   9   0    1.76    1.21
  -5   9   0   -0.19    1.15
  -4   9   0    4.38    1.24
  -3   9   0   11.55    1.42
  -2   9   0   45.52    2.25
  -1   9   0    6.13    1.23
   0   9   0    0.31    1.10
   1   9   0    7.04    1.37
   2   9   0   44.06    2.36
   3   9   0    8.92    1.62
   4   9   0    5.89    1.56
   5   9   0   -0.90    1.62
   6   9   0   -0.33    1.82
  -6  10   0    0.44    1.29
  -5  10   0    1.31    1.26
  -4  10   0    5.27    1.38
  -3  10   0   34.58    2.16
  -2  10   0    1.12    1.17
  -1  10   0   10.40    1.39
   0  10   0   40.38    2.35
   1  10   0    9.89    1.56
   2  10   0    0.73    1.41
   3  10   0   36.26    2.37
   4  10   0    9.71    1.79
   5  10   0    2.49    1.82
   6  10   0    1.87    1.87
  -6  11   0    2.15    1.42
  -5  11   0    4.35    1.42
  -4  11   0    1.78    1.30
  -3  11   0   41.14    2.41
  -2  11   0    9.65    1.53
  -1  11   0   16.90    1.71
   0  11   0   -1.19    1.21
   1  11   0   18.03    1.84
   2  11   0   14.28    1.85
   3  11   0   39.39    2.54
   4  11   0    3.22    1.62
   5  11   0    0.66    1.85
   6  11   0    2.82    2.02
  -5  12   0    1.76    1.44
  -4  12   0    0.59    1.33
  -3  12   0    6.12    1.52
  -2  12   0    8.16    1.56
  -1  12   0    9.51    1.64
   0  12   0   93.91    3.57
   1  12   0   11.91    1.80
   2  12   0    2.41    1.57
   3  12   0    7.39    1.87
   4  12   0    0.26    1.62
   5  12   0    2.35    1.97
  -5  13   0    3.60    1.55
  -4  13   0    0.89    1.45
  -3  13   0    7.06    1.61
  -2  13   0    8.30    1.65
  -1  13   0    5.28    1.62
   0  13   0   -0.90    1.45
   1  13   0    4.80    1.71
   2  13   0    9.11    1.97
   3  13   0    4.75    1.92
   4  13   0    0.42    1.68
   5  13   0    3.77    2.15
  -4  14   0    9.29    1.82
  -3  14   0    0.61    1.50
  -2  14   0    7.28    1.75
  -1  14   0   21.16    2.21
   0  14   0   25.20    2.38
   1  14   0   23.00    2.33
   2  14   0    4.98    1.97
   3  14   0   -0.53    1.90
   4  14   0    9.21    2.24
  -4  15   0   -0.01    1.54
  -3  15   0   -1.80    1.46
  -2  15   0    8.96    1.86
  -1  15   0    1.67    1.60
   0  15   0   -1.45    1.56
   1  15   0    3.08    1.85
   2  15   0    5.95    2.00
   3  15   0   -0.50    1.95
   4  15   0   -1.29    1.88
  -3  16   0    1.18    1.64
  -2  16   0    3.70    1.80
  -1  16   0    5.16    1.87
   0  16   0    3.14    1.87
   1  16   0    0.75    1.92
   2  16   0    3.85    2.10
   3  16   0   -1.48    2.03
  -2  17   0   12.83    2.16
  -1  17   0    1.13    1.81
   0  17   0   -2.50    1.78
   1  17   0    5.32    2.13
   2  17   0   13.55    2.52
   2  17  -1    1.46    2.20
   1  17  -1    1.11    2.04
   0  17  -1   23.75    2.60
  -1  17  -1   -1.21    1.72
  -2  17  -1    4.63    1.94
   3  16  -1   -0.64    2.12
   2  16  -1    4.86    2.19
   0  16  -1    3.09    1.89
  -1  16  -1   28.07    2.59
  -2  16  -1    0.68    1.69
  -3  16  -1    0.87    1.66
   4  15  -1    1.11    1.96
   3  15  -1   11.02    2.35
   2  15  -1   -0.33    1.82
   1  15  -1    5.31    1.92
   0  15  -1    6.16    1.86
  -1  15  -1    4.10    1.76
  -2  15  -1    2.47    1.64
  -3  15  -1    8.06    1.81
  -4  15  -1    2.55    1.64
   4  14  -1    1.60    2.08
   3  14  -1    1.99    1.92
   2  14  -1    2.84    1.89
   1  14  -1   27.13    2.45
   0  14  -1    5.51    1.75
  -2  14  -1    1.11    1.50
  -3  14  -1    2.06    1.53
  -4  14  -1    5.07    1.63
   5  13  -1    3.40    2.12
   4  13  -1   18.07    2.35
   3  13  -1    4.80    1.80
   2  13  -1    5.65    1.84
   1  13  -1    4.95    1.69
   0  13  -1   -1.69    1.42
  -1  13  -1    5.75    1.57
  -2  13  -1    5.80    1.54
  -3  13  -1    3.89    1.50
  -4  13  -1   13.71    1.79
  -5  13  -1   15.13    1.90
   5  12  -1    4.07    2.00
   4  12  -1    1.84    1.64
   3  12  -1    1.60    1.69
   2  12  -1   11.73    1.93
   1  12  -1    6.40    1.66
   0  12  -1   11.98    1.81
  -1  12  -1    2.00    1.38
  -2  12  -1    6.49    1.54
  -3  12  -1    1.58    1.37
  -4  12  -1    2.05    1.36
  -5  12  -1    4.85    1.51
   6  11  -1    5.07    2.04
   5  11  -1    3.58    1.94
   4  11  -1   41.84    2.69
   3  11  -1    6.44    1.79
   2  11  -1    4.77    1.60
   1  11  -1   14.83    1.82
   0  11  -1    1.44    1.30
  -1  11  -1   11.96    1.59
  -2  11  -1    3.44    1.32
  -3  11  -1    7.11    1.45
  -4  11  -1   39.58    2.35
  -5  11  -1    5.30    1.43
  -6  11  -1    8.13    1.53
   6  10  -1    2.33    1.93
   5  10  -1   14.30    2.14
   4  10  -1   13.61    1.88
   3  10  -1   17.40    1.92
   2  10  -1   13.79    1.75
   1  10  -1   17.00    1.77
   0  10  -1   12.49    1.56
  -1  10  -1   16.24    1.64
  -2  10  -1   13.05    1.46
  -3  10  -1   16.87    1.60
  -4  10  -1   11.89    1.47
  -5  10  -1   13.14    1.54
  -6  10  -1    1.47    1.25
   6   9  -1    5.65    1.99
   5   9  -1    7.19    1.90
  -5  -9   1    8.16    1.73
   4   9  -1   17.73    1.92
  -4  -9   1   17.13    1.87
   3   9  -1  165.30    4.70
   3   9  -1  161.28    4.07
  -3  -9   1  154.73    4.61
   2   9  -1   15.66    1.68
   1   9  -1    9.42    1.42
   0   9  -1    7.92    1.33
  -1   9  -1   10.35    1.37
  -2   9  -1   15.20    1.47
  -3   9  -1  154.05    4.30
  -4   9  -1   16.84    1.51
  -5   9  -1   10.97    1.41
  -6   9  -1    9.04    1.40
   7   8  -1    8.22    2.18
   6   8  -1    0.34    1.74
  -6  -8   1    0.14    1.58
   5   8  -1   14.18    1.95
  -5  -8   1    8.00    1.66
   4   8  -1    7.73    1.51
  -4  -8   1    6.61    1.52
   3   8  -1   67.27    2.75
   3   8  -1   69.30    2.35
  -3  -8   1   65.94    2.76
   2   8  -1   80.36    2.91
  -2  -8   1   80.41    2.87
   1   8  -1   78.29    2.78
   0   8  -1   36.59    2.02
  -1   8  -1   79.91    2.78
  -2   8  -1   80.75    2.75
  -3   8  -1   65.60    2.46
  -4   8  -1    7.52    1.19
  -5   8  -1   11.63    1.34
  -6   8  -1   -2.05    0.98
   7   7  -1   -1.91    1.75
  -7  -7   1    1.13    1.65
   6   7  -1    9.26    1.98
  -6  -7   1    9.14    1.75
   5   7  -1    1.96    1.57
  -5  -7   1    2.70    1.43
   4   7  -1   13.09    1.51
   4   7  -1   15.72    1.73
  -4  -7   1    8.15    1.50
   3   7  -1   24.64    1.83
   3   7  -1   24.42    1.49
  -3  -7   1   21.93    1.84
   2   7  -1   16.23    1.45
  -2  -7   1   13.50    1.41
   1   7  -1   36.88    2.02
  -1  -7   1   34.08    1.90
   0   7  -1    4.20    1.14
  -1   7  -1   37.47    1.91
  -2   7  -1   16.93    1.33
  -3   7  -1   23.55    1.61
  -4   7  -1   13.00    1.24
  -5   7  -1    3.17    1.03
  -6   7  -1    7.14    1.07
   7   6  -1    2.17    1.88
  -7  -6   1    2.54    1.63
   6   6  -1   12.75    1.97
  -6  -6   1   12.56    1.76
   5   6  -1    5.97    1.65
   5   6  -1    4.83    1.17
  -5  -6   1    1.75    1.38
   4   6  -1   18.70    1.75
   4   6  -1   16.05    1.47
  -4  -6   1   17.85    1.62
   3   6  -1   31.54    1.63
   3   6  -1   28.41    1.79
  -3  -6   1   31.61    1.87
   2   6  -1  162.45    4.24
  -2  -6   1  157.48    4.20
   1   6  -1    5.32    1.16
  -1  -6   1    4.82    1.09
   0   6  -1    8.31    1.18
  -1   6  -1    4.01    1.04
  -1   6  -1    5.72    0.97
  -2   6  -1  158.55    4.01
  -3   6  -1   28.57    1.53
  -4   6  -1   14.20    1.15
  -5   6  -1    5.49    0.95
   7   5  -1    1.55    1.84
  -7  -5   1    0.65    1.49
   6   5  -1    5.30    1.79
  -6  -5   1    3.83    1.47
   5   5  -1   63.99    3.03
  -5  -5   1   63.83    2.63
   4   5  -1    8.94    1.39
   4   5  -1    7.02    1.13
  -4  -5   1    8.84    1.30
   3   5  -1   34.19    1.57
   3   5  -1   33.49    1.76
  -3  -5   1   30.66    1.78
  -3  -5   1   29.65    1.77
   2   5  -1   66.30    2.34
   2   5  -1   67.38    1.92
  -2  -5   1   50.25    2.22
  -2  -5   1   64.37    2.27
   1   5  -1   12.20    1.21
  -1  -5   1   20.02    1.26
  -1  -5   1   13.28    1.22
   0   5  -1  207.65    5.06
   0   5  -1  207.86    5.09
   0  -5   1  236.60    5.11
  -1   5  -1   16.65    1.39
  -1   5  -1   16.50    1.17
   1  -5   1   20.81    1.21
  -2   5  -1   66.31    2.12
   2  -5   1   67.19    2.05
  -3   5  -1   32.66    1.47
  -4   5  -1    8.54    0.90
  -5   5  -1   62.32    1.98
   7   4  -1    8.70    2.04
  -7  -4   1   10.92    1.77
  -7  -4   1    9.01    1.63
   6   4  -1   13.20    1.94
  -6  -4   1   14.55    1.61
  -6  -4   1   16.98    1.76
   5   4  -1    4.54    1.43
  -5  -4   1    3.10    1.19
  -5  -4   1    2.68    1.22
   4   4  -1    6.64    1.00
   4   4  -1    5.67    1.26
  -4  -4   1    4.67    1.06
  -4  -4   1    6.15    1.12
  -4  -4   1    6.24    1.07
   3   4  -1   16.87    1.39
   3   4  -1   16.66    1.18
   3   4  -1   17.75    1.44
  -3  -4   1   16.22    1.21
  -3  -4   1   15.08    1.26
   2   4  -1   18.92    1.56
   2   4  -1   21.97    1.25
  -2  -4   1   20.95    1.51
  -2  -4   1   23.89    1.51
   1   4  -1   49.30    1.84
   1   4  -1   53.45    1.92
  -1  -4   1   51.18    1.91
  -1  -4   1   54.52    1.91
   0   4  -1   -1.17    0.69
   0   4  -1    0.99    0.81
   0  -4   1   -0.07    0.72
   0  -4   1   -0.11    0.77
  -1   4  -1   55.53    1.81
   1  -4   1   51.66    1.76
  -2   4  -1   23.64    1.30
   2  -4   1   22.86    1.20
  -3   4  -1   15.29    1.12
  -4   4  -1    6.21    0.74
  -7   4  -1   12.23    1.99
   7   3  -1    2.20    1.80
  -7  -3   1    0.10    1.31
  -7  -3   1   -0.34    1.46
   6   3  -1   12.08    1.90
  -6  -3   1   11.26    1.47
  -6  -3   1   11.59    1.60
   5   3  -1    6.60    1.49
  -5  -3   1    5.55    1.19
  -5  -3   1    6.36    1.25
   4   3  -1   20.28    1.65
   4   3  -1   17.74    1.26
  -4  -3   1   16.58    1.21
  -4  -3   1   17.64    1.45
  -4  -3   1   17.99    1.35
   3   3  -1   30.54    1.83
   3   3  -1   28.46    1.48
  -3  -3   1   30.36    1.60
  -3  -3   1   29.81    1.54
  -3  -3   1   30.77    1.60
   2   3  -1   38.62    1.65
   2   3  -1   40.32    1.66
   2   3  -1   40.61    1.48
  -2  -3   1   41.73    1.67
  -2  -3   1   39.04    1.67
   1   3  -1   63.45    1.99
   1   3  -1   64.43    1.93
  -1  -3   1   59.83    1.90
  -1  -3   1   57.82    1.92
   0   3  -1   15.56    0.91
   0   3  -1   16.54    1.20
   0  -3   1   14.95    0.95
   0  -3   1   15.15    1.15
  -1   3  -1   59.41    1.77
   1  -3   1   59.75    1.73
  -2   3  -1   39.92    1.33
  -2   3  -1   36.24    1.96
  -3   3  -1   31.70    2.14
  -3   3  -1   30.78    1.19
  -7   3  -1    0.80    1.54
   7   2  -1    9.31    2.12
  -7  -2   1    5.18    1.63
  -7  -2   1    8.94    1.44
   6   2  -1   15.58    2.02
  -6  -2   1   12.78    1.41
  -6  -2   1   14.07    1.70
   5   2  -1    9.53    1.60
  -5  -2   1    8.59    1.36
  -5  -2   1    9.11    1.10
  -5  -2   1    7.42    1.15
   4   2  -1   36.50    2.09
  -4  -2   1   34.85    1.80
  -4  -2   1   37.05    1.67
  -4  -2   1   35.14    1.66
   3   2  -1   19.47    1.63
   3   2  -1   16.61    1.19
   3   2  -1   16.37    1.16
  -3  -2   1   16.61    1.20
  -3  -2   1   14.04    1.08
  -3  -2   1   18.21    1.33
   2   2  -1   23.22    1.23
   2   2  -1   25.53    1.28
   2   2  -1   25.78    1.56
  -2  -2   1   23.74    1.31
  -2  -2   1   22.50    1.24
  -2  -2   1   24.47    1.33
   1   2  -1  288.33    6.11
   1   2  -1  284.58    6.09
   1   2  -1  280.04    5.52
  -1  -2   1  282.14    6.11
   0   2  -1  130.27    2.94
   0   2  -1  128.16    2.95
   0  -2   1  131.33    2.93
   0  -2   1  132.05    2.96
  -1   2  -1  280.04    5.92
   1  -2   1  284.12    5.90
  -2   2  -1   23.03    1.68
  -3   2  -1   22.37    1.56
  -6   2  -1   14.46    1.86
  -7   2  -1   13.03    1.92
  -7  -1   1    3.86    1.56
  -7  -1   1    1.50    1.22
   6   1  -1   20.78    2.16
  -6  -1   1   17.02    1.42
  -6  -1   1   16.42    1.79
   5   1  -1   10.46    1.63
  -5  -1   1    9.56    1.12
  -5  -1   1    8.44    1.01
  -5  -1   1    5.61    1.28
   4   1  -1   10.41    1.40
  -4  -1   1   12.23    1.27
  -4  -1   1    9.00    0.94
  -4  -1   1   12.98    0.99
   3   1  -1   45.50    2.07
   3   1  -1   43.93    1.45
  -3  -1   1   45.23    2.14
  -3  -1   1   44.91    1.88
  -3  -1   1   46.62    1.67
  -3  -1   1   45.90    1.65
   2   1  -1   58.29    1.67
   2   1  -1   58.37    1.67
   2   1  -1   60.10    2.10
  -2  -1   1   59.13    2.07
  -2  -1   1   60.00    1.77
  -2  -1   1   58.91    1.74
   1   1  -1   17.38    0.94
   1   1  -1   16.02    0.99
   1   1  -1   16.37    0.87
  -1  -1   1   15.13    0.89
  -1  -1   1   15.91    0.90
   0   1  -1   -0.29    0.21
   0  -1   1    0.08    0.20
  -1   1  -1   16.89    1.16
   1  -1   1   16.86    1.26
  -2   1  -1   59.47    2.22
   2  -1   1   57.20    2.33
  -3   1  -1   48.21    2.36
   3  -1   1   47.70    2.35
   4  -1   1   12.44    1.56
  -5   1  -1    8.95    1.42
  -6   1  -1   12.97    1.78
  -7   1  -1    2.36    1.54
  -7   0   1   10.97    1.86
  -6   0   1    4.90    1.10
  -6   0   1    6.24    1.51
   5   0  -1   11.33    1.66
  -5   0   1   10.12    1.08
  -5   0   1   10.37    1.46
   4   0  -1    3.64    1.16
  -4   0   1    4.64    0.78
  -4   0   1    3.41    0.79
   3   0  -1   25.27    1.79
  -3   0   1   25.87    1.26
  -3   0   1   27.24    1.26
  -3   0   1   27.57    1.88
   2   0  -1  131.32    2.89
   2   0  -1  126.84    3.47
  -2   0   1  130.12    2.96
  -2   0   1  127.64    3.45
  -2   0   1  128.05    2.96
   1   0  -1  145.81    3.20
   1   0  -1  154.83    3.55
  -1   0   1  148.76    3.23
  -1   0   1  148.82    3.23
  -1   0   1  148.53    3.53
  -1   0  -1  146.61    3.59
   1   0   1  148.54    3.62
  -2   0  -1  129.22    3.54
   2   0   1  125.01    3.54
  -3   0  -1   27.65    1.96
   3   0   1   26.96    1.94
  -4   0  -1    2.82    1.08
   4   0   1    3.28    1.24
  -5   0  -1    7.58    1.37
   5   0   1    8.77    1.71
  -6   0  -1    6.73    1.53
   6   0   1    6.50    1.83
  -7   0  -1   16.44    2.03
  -7   1   1    3.44    1.59
  -6   1   1   15.54    1.87
  -6   1   1   21.67    1.53
  -5   1   1    8.73    0.99
  -4   1   1    8.36    0.82
  -3   1   1   46.78    2.20
  -3   1   1   46.58    1.54
   2  -1  -1   59.22    1.53
  -2   1   1   58.31    2.15
  -2   1   1   59.95    1.62
   1  -1  -1   15.16    0.77
  -1   1   1   14.36    0.81
   0   1   1    0.11    0.21
  -1  -1  -1   15.85    0.78
  -1  -1  -1   13.68    0.77
  -1  -1  -1   17.14    0.93
   1   1   1   16.81    1.19
   1   1   1   15.99    0.93
   1   1   1   16.52    0.75
  -2  -1  -1   58.76    1.57
  -2  -1  -1   54.59    1.55
  -2  -1  -1   54.14    2.10
  -2  -1  -1   58.05    1.85
   2   1   1   56.21    2.22
  -3  -1  -1   44.56    1.47
  -3  -1  -1   45.34    2.19
  -3  -1  -1   43.87    1.86
  -3  -1  -1   47.11    1.49
   3   1   1   42.88    2.15
  -4  -1  -1    9.08    0.80
  -4  -1  -1    9.09    1.18
  -4  -1  -1    7.66    0.81
   4   1   1   10.67    1.46
  -5  -1  -1    8.68    0.96
  -5  -1  -1    7.46    1.36
  -5  -1  -1    8.01    0.91
   5   1   1    9.70    1.66
  -6  -1  -1   19.32    1.92
  -6  -1  -1   17.59    1.29
   6   1   1   25.39    2.39
  -7  -1  -1    4.34    1.62
   7   1   1    0.63    1.85
  -7   2   1    5.92    1.71
  -6   2   1   14.33    1.20
  -5   2   1    8.60    0.94
  -4   2   1   34.06    1.37
  -3   2   1   21.01    1.48
  -3   2   1   17.50    1.10
   2  -2  -1   22.55    1.01
  -2   2   1   21.14    1.66
  -2   2   1   25.18    1.10
   1  -2  -1  276.33    5.85
  -1   2   1  274.54    5.86
   0  -2  -1  130.50    2.92
   0   2   1  126.23    2.92
  -1  -2  -1  277.43    5.93
  -1  -2  -1  277.66    5.93
   1   2   1  274.89    5.50
   1   2   1  282.63    5.93
   1   2   1  273.86    5.93
  -2  -2  -1   25.15    1.19
  -2  -2  -1   23.05    1.22
  -2  -2  -1   27.12    1.37
   2   2   1   20.82    1.11
   2   2   1   22.56    1.13
   2   2   1   24.42    1.64
   2   2   1   22.59    1.32
  -3  -2  -1   18.74    1.22
  -3  -2  -1   14.86    1.21
  -3  -2  -1   16.68    1.20
   3   2   1   16.49    1.49
   3   2   1   17.18    0.99
  -4  -2  -1   35.40    1.55
  -4  -2  -1   38.79    1.56
  -4  -2  -1   39.09    1.90
   4   2   1   36.24    2.21
  -5  -2  -1    8.59    1.34
  -5  -2  -1    8.48    1.06
  -5  -2  -1    8.85    1.01
   5   2   1    9.11    1.65
  -6  -2  -1   14.26    1.31
  -6  -2  -1   13.34    1.70
   6   2   1   17.17    2.14
  -7  -2  -1   13.03    1.88
   7   2   1   13.87    2.26
  -7   3   1    2.59    1.63
  -6   3   1   11.69    1.12
  -5   3   1    4.48    0.86
  -4   3   1   17.55    1.17
  -3   3   1   28.63    1.32
  -3   3   1   31.95    2.09
   2  -3  -1   40.09    1.45
  -2   3   1   40.49    1.50
   1  -3  -1   63.08    1.88
  -1   3   1   62.80    1.87
   0  -3  -1   14.41    1.16
   0   3   1   15.53    1.19
  -1  -3  -1   60.02    1.85
  -1  -3  -1   60.21    1.86
   1   3   1   58.23    1.93
   1   3   1   60.86    1.89
  -2  -3  -1   41.44    1.62
  -2  -3  -1   40.51    1.59
   2   3   1   40.99    1.61
   2   3   1   37.82    1.56
   2   3   1   41.77    1.63
  -3  -3  -1   31.14    1.52
  -3  -3  -1   31.64    1.59
  -3  -3  -1   26.62    1.49
   3   3   1   29.78    1.40
   3   3   1   31.40    1.98
   3   3   1   31.32    1.40
   3   3   1   29.55    1.65
  -4  -3  -1   17.02    1.36
  -4  -3  -1   16.24    1.35
  -4  -3  -1   15.69    1.34
   4   3   1   19.61    1.73
  -5  -3  -1    3.07    1.20
  -5  -3  -1    4.50    1.09
   5   3   1    6.04    1.55
  -6  -3  -1    9.47    1.56
  -6  -3  -1   12.29    1.38
   6   3   1   10.43    1.97
  -7  -3  -1   -0.20    1.25
  -7  -3  -1   -0.38    1.40
   7   3   1    1.70    1.89
  -6   4   1   14.19    1.19
  -5   4   1    4.05    0.87
  -4   4   1    5.63    0.84
   3  -4  -1   14.99    1.07
  -3   4   1   17.16    1.26
   2  -4  -1   21.79    1.31
  -2   4   1   22.81    1.39
   1  -4  -1   54.66    1.84
  -1   4   1   51.95    1.83
   0  -4  -1    0.59    0.72
   0   4   1   -0.19    0.81
  -1  -4  -1   50.40    1.90
   1   4   1   55.06    1.90
   1   4   1   53.57    1.94
  -2  -4  -1   20.88    1.50
  -2  -4  -1   21.61    1.48
   2   4   1   22.54    1.52
   2   4   1   24.49    1.38
  -3  -4  -1   14.41    1.14
  -3  -4  -1   12.57    1.17
   3   4   1   15.74    1.20
   3   4   1   14.50    1.12
   3   4   1   17.15    1.53
  -4  -4  -1    5.96    1.00
  -4  -4  -1    5.25    1.06
  -4  -4  -1    6.63    1.10
   4   4   1    7.30    1.39
   4   4   1    5.76    0.91
  -5  -4  -1    2.71    1.18
  -5  -4  -1    1.39    1.12
   5   4   1    4.18    1.49
  -6  -4  -1   10.83    1.61
  -6  -4  -1   11.30    1.48
   6   4   1   13.87    2.06
   7   4   1    5.89    2.00
  -6   5   1    2.35    0.95
  -5   5   1   61.01    2.14
  -4   5   1    8.26    0.98
  -3   5   1   32.51    1.56
  -2   5   1   64.64    2.18
   1  -5  -1   17.98    1.18
  -1   5   1   17.16    1.18
   0  -5  -1  221.46    5.06
   0   5   1  208.26    5.06
  -1  -5  -1   15.98    1.17
   1   5   1   13.52    1.19
  -2  -5  -1   66.28    2.30
  -2  -5  -1   64.74    2.36
   2   5   1   68.46    2.13
   2   5   1   67.20    2.37
  -3  -5  -1   31.57    1.70
  -3  -5  -1   28.71    1.72
   3   5   1   31.58    1.64
   3   5   1   28.75    1.62
  -4  -5  -1    8.03    1.13
  -4  -5  -1    7.87    1.20
   4   5   1    8.22    1.10
   4   5   1    8.55    1.47
  -5  -5  -1   58.06    2.49
   5   5   1   65.54    3.09
  -6  -5  -1    2.80    1.37
   6   5   1    3.96    1.76
   7   5   1   -2.91    1.74
  -6   6   1   10.79    1.18
  -5   6   1    4.76    1.04
  -4   6   1   17.69    1.46
  -3   6   1   31.73    1.68
  -2   6   1  165.07    4.19
  -1   6   1    6.22    1.06
   0   6   1    7.37    1.14
   1   6   1    4.38    1.11
   2   6   1  162.61    4.25
  -3  -6  -1   31.17    1.78
   3   6   1   31.57    1.78
   3   6   1   28.35    1.61
  -4  -6  -1   17.46    1.54
   4   6   1   15.93    1.43
   4   6   1   17.57    1.81
  -5  -6  -1    5.65    1.41
   5   6   1    4.82    1.63
   6   6   1   12.02    2.05
   7   6   1    5.25    2.10
  -6   7   1    5.97    1.17
  -5   7   1    4.62    1.13
  -4   7   1   10.79    1.25
  -3   7   1   24.85    1.63
  -2   7   1   16.65    1.35
  -1   7   1   36.11    1.89
   0   7   1    4.01    1.10
   1   7   1   36.54    2.06
   2   7   1   15.98    1.44
   3   7   1   20.64    1.70
   3   7   1   21.79    1.60
  -4  -7  -1   12.39    1.53
   4   7   1   11.17    1.46
   4   7   1   16.07    1.84
   5   7   1    3.77    1.70
   6   7   1    4.35    1.88
   7   7   1    0.58    1.91
  -6   8   1    0.93    1.13
  -5   8   1   13.84    1.43
  -4   8   1    6.71    1.24
  -3   8   1   68.87    2.55
  -2   8   1   81.20    2.77
  -1   8   1   75.57    2.68
   0   8   1   40.53    2.03
   1   8   1   80.46    2.87
   2   8   1   71.16    2.70
   3   8   1   65.16    2.61
   4   8   1   11.20    1.83
   5   8   1    9.61    1.95
   6   8   1    2.56    1.87
   7   8   1    7.66    2.19
  -6   9   1    7.57    1.41
  -5   9   1    9.88    1.45
  -4   9   1   16.36    1.56
  -3   9   1  156.53    4.36
  -2   9   1   16.83    1.51
  -1   9   1    8.67    1.31
   0   9   1    9.28    1.31
   1   9   1    7.20    1.32
   2   9   1   18.53    1.66
   3   9   1  154.14    4.51
   4   9   1   19.96    1.91
   5   9   1   11.15    1.97
   6   9   1    7.21    2.14
  -6  10   1    2.76    1.40
  -5  10   1   13.20    1.61
  -4  10   1   12.06    1.55
  -3  10   1   14.68    1.60
  -2  10   1   10.68    1.49
  -1  10   1   15.15    1.59
   0  10   1   13.42    1.59
   1  10   1   16.91    1.70
   2  10   1   11.58    1.63
   3  10   1   15.85    1.88
   4  10   1   11.94    1.84
   5  10   1   11.69    2.18
   6  10   1    1.67    1.96
  -6  11   1    6.07    1.61
  -5  11   1    3.66    1.44
  -4  11   1   42.31    2.46
  -3  11   1    5.36    1.41
  -2  11   1    1.06    1.27
  -1  11   1   13.13    1.61
   0  11   1    2.90    1.36
   1  11   1   13.13    1.71
   2  11   1    2.89    1.56
   3  11   1    6.01    1.78
   4  11   1   43.04    2.73
   5  11   1    4.68    1.95
   6  11   1    2.84    2.05
  -5  12   1    3.36    1.49
  -4  12   1    1.44    1.40
  -3  12   1    1.93    1.40
  -2  12   1    7.64    1.60
  -1  12   1    2.35    1.42
   0  12   1   10.78    1.76
   1  12   1    2.78    1.56
   2  12   1    7.49    1.82
   3  12   1    5.05    1.86
   4  12   1    0.48    1.58
   5  12   1    0.65    1.93
  -5  13   1   13.19    1.90
  -4  13   1   13.52    1.84
  -3  13   1    5.28    1.56
  -2  13   1    5.55    1.58
  -1  13   1    4.08    1.55
   0  13   1    0.04    1.52
   1  13   1    4.79    1.76
   2  13   1    4.56    1.84
   3  13   1    4.95    1.92
   4  13   1   16.61    2.35
   5  13   1   16.16    2.57
  -4  14   1    7.73    1.75
  -3  14   1    2.17    1.51
  -2  14   1    2.58    1.54
  -1  14   1   31.65    2.59
   0  14   1    4.46    1.75
   1  14   1   29.51    2.59
   2  14   1    1.12    1.84
   3  14   1    3.94    2.00
   4  14   1    5.99    2.00
  -4  15   1    2.70    1.68
  -3  15   1    9.06    1.87
  -2  15   1    1.13    1.54
  -1  15   1    1.83    1.66
   0  15   1    6.56    1.86
   1  15   1    5.64    1.96
   2  15   1   -0.43    1.85
   3  15   1   12.17    2.33
   4  15   1   -0.42    1.90
  -3  16   1    1.52    1.66
  -2  16   1    6.13    1.87
  -1  16   1   26.77    2.56
   0  16   1    0.41    1.80
   2  16   1    5.94    2.17
   3  16   1   -0.63    2.11
  -2  17   1    3.60    1.87
  -1  17   1   -0.53    1.76
   0  17   1   18.74    2.51
   1  17   1    0.30    2.04
   2  17   1    3.65    2.23
   2  17  -2   11.21    2.39
   1  17  -2    5.34    2.23
   0  17  -2   12.68    2.27
  -1  17  -2    8.10    2.09
  -2  17  -2    8.90    2.02
   3  16  -2    3.21    2.20
   2  16  -2    2.05    2.00
   1  16  -2    2.45    1.94
   0  16  -2    4.99    1.92
  -1  16  -2    1.16    1.74
  -2  16  -2   -1.44    1.63
  -3  16  -2    0.28    1.66
   4  15  -2   11.11    2.42
   3  15  -2    6.22    2.12
   2  15  -2    5.88    2.00
   1  15  -2    1.30    1.78
   0  15  -2   15.53    2.11
  -1  15  -2    2.54    1.69
  -2  15  -2    5.09    1.70
  -3  15  -2    4.93    1.72
  -4  15  -2    7.84    1.79
   4  14  -2   17.48    2.47
   3  14  -2    4.36    1.91
   2  14  -2    3.04    1.85
   1  14  -2    1.75    1.76
   0  14  -2    7.23    1.76
  -1  14  -2    3.18    1.52
  -2  14  -2    3.67    1.59
  -3  14  -2    4.51    1.59
  -4  14  -2   15.82    1.93
   5  13  -2   -1.02    1.93
   4  13  -2   -0.64    1.67
   3  13  -2   10.72    2.12
   2  13  -2   16.36    2.17
   1  13  -2    1.53    1.64
   0  13  -2    1.14    1.54
  -1  13  -2    4.51    1.50
  -2  13  -2   13.19    1.78
  -3  13  -2   10.30    1.69
  -4  13  -2    0.78    1.41
  -5  13  -2    1.32    1.45
   5  12  -2   18.78    2.39
   4  12  -2   11.26    2.07
   3  12  -2   20.59    2.23
   2  12  -2   16.10    2.04
   1  12  -2    0.40    1.47
   0  12  -2    5.60    1.62
  -1  12  -2    2.72    1.38
  -2  12  -2   15.24    1.77
  -3  12  -2   17.01    1.81
  -4  12  -2   10.22    1.62
  -5  12  -2   21.86    1.94
   6  11  -2    5.46    2.14
   5  11  -2    0.40    1.74
   4  11  -2    0.61    1.57
   3  11  -2    1.68    1.62
   2  11  -2   46.22    2.68
   1  11  -2   13.41    1.79
   0  11  -2   14.89    1.75
  -1  11  -2   13.01    1.63
  -2  11  -2   48.61    2.54
  -3  11  -2    1.05    1.29
  -4  11  -2    2.88    1.30
  -5  11  -2    2.76    1.33
  -6  11  -2   10.00    1.55
   6  10  -2    8.03    2.09
   5  10  -2   22.16    2.32
  -5 -10   2   26.05    2.32
   4  10  -2    1.13    1.47
  -4 -10   2    1.53    1.53
   3  10  -2   28.09    2.28
  -3 -10   2   26.15    2.20
   2  10  -2    4.73    1.53
   1  10  -2    8.31    1.50
   0  10  -2    5.66    1.39
  -1  10  -2    9.95    1.49
  -2  10  -2    9.20    1.44
  -3  10  -2   26.61    2.03
  -4  10  -2   -0.68    1.15
  -5  10  -2   30.61    2.08
  -6  10  -2   10.61    1.47
   6   9  -2    8.56    2.11
  -6  -9   2    9.01    1.94
   5   9  -2   22.38    2.21
  -5  -9   2   19.40    2.07
   4   9  -2   21.44    1.95
  -4  -9   2   15.36    1.87
   3   9  -2    4.88    1.47
   3   9  -2    4.04    0.94
  -3  -9   2    4.04    1.41
   2   9  -2    3.48    1.33
  -2  -9   2    1.74    1.26
   1   9  -2   16.84    1.63
   0   9  -2   43.68    2.25
  -1   9  -2   21.34    1.65
  -2   9  -2    4.91    1.19
  -3   9  -2    4.36    1.15
  -4   9  -2   17.66    1.54
  -5   9  -2   19.41    1.60
  -6   9  -2   11.44    1.35
  -7  -8   2   -0.57    1.74
   6   8  -2    0.56    1.69
  -6  -8   2    2.94    1.71
   5   8  -2   11.67    1.84
  -5  -8   2   12.35    1.81
   4   8  -2   94.25    3.29
  -4  -8   2   90.67    3.37
   3   8  -2   32.57    1.66
   3   8  -2   29.83    2.05
  -3  -8   2   31.33    2.12
   2   8  -2   14.39    1.51
  -2  -8   2   16.76    1.53
   1   8  -2   18.57    1.59
  -1  -8   2   23.62    1.69
   0   8  -2    1.12    1.09
  -1   8  -2   23.52    1.76
  -2   8  -2   16.88    1.42
  -3   8  -2   34.12    1.92
  -3   8  -2   36.71    1.92
  -4   8  -2   97.17    3.04
  -5   8  -2   15.55    1.37
  -6   8  -2    3.44    1.10
   7   7  -2   -0.44    1.84
  -7  -7   2    1.40    1.71
   6   7  -2    2.74    1.74
  -6  -7   2    3.04    1.58
   5   7  -2   16.45    1.66
   5   7  -2   18.08    1.92
  -5  -7   2   15.22    1.83
   4   7  -2   62.20    2.62
   4   7  -2   61.44    2.81
   4   7  -2   63.11    2.40
  -4  -7   2   64.39    2.72
   3   7  -2   30.46    1.58
   3   7  -2   29.94    1.97
  -3  -7   2   30.31    1.95
   2   7  -2    2.35    1.13
  -2  -7   2    4.94    1.17
   1   7  -2   36.26    2.03
  -1  -7   2   36.04    1.91
   0   7  -2   97.45    3.08
  -1   7  -2   33.34    1.91
  -2   7  -2    4.05    1.01
  -2   7  -2    2.63    0.83
  -3   7  -2   31.07    1.65
  -3   7  -2   26.11    1.63
  -4   7  -2   63.98    2.29
  -5   7  -2   16.44    1.28
  -6   7  -2    1.95    0.94
   7   6  -2   -2.88    1.71
  -7  -6   2    4.80    1.67
   6   6  -2    4.27    1.76
  -6  -6   2    1.33    1.53
   5   6  -2    2.18    1.42
   5   6  -2    0.81    1.09
  -5  -6   2    1.15    1.36
   4   6  -2   99.27    3.11
   4   6  -2   95.23    3.44
  -4  -6   2   95.56    3.21
   3   6  -2   67.54    2.46
   3   6  -2   61.25    2.07
  -3  -6   2   64.56    2.45
   2   6  -2   10.22    1.29
  -2  -6   2    9.60    1.26
   1   6  -2   97.95    3.08
  -1  -6   2  101.09    3.00
   0   6  -2    7.86    1.14
  -1   6  -2  104.08    3.01
  -1   6  -2  101.10    2.94
  -2   6  -2   10.05    1.09
  -2   6  -2    9.02    0.95
  -3   6  -2   64.59    2.11
  -4   6  -2   97.22    2.73
  -5   6  -2    0.30    0.82
   7   5  -2   13.21    2.12
  -7  -5   2   13.83    1.85
   6   5  -2    9.06    1.80
  -6  -5   2    8.95    1.59
   5   5  -2   14.48    1.77
   5   5  -2   11.56    1.26
  -5  -5   2   10.38    1.51
   4   5  -2   32.88    1.82
   4   5  -2   32.12    2.10
  -4  -5   2   31.90    1.92
   3   5  -2   61.99    2.03
   3   5  -2   60.21    2.27
  -3  -5   2   62.00    2.33
   2   5  -2   26.54    1.30
   2   5  -2   23.97    1.72
  -2  -5   2   21.73    1.68
  -2  -5   2   26.36    1.71
   1   5  -2   66.27    2.40
  -1  -5   2   66.25    2.31
  -1  -5   2   76.36    2.41
   0   5  -2   20.01    1.53
   0   5  -2   20.90    1.47
   0  -5   2   20.59    1.52
   0  -5   2   20.27    1.46
  -1   5  -2   68.68    2.25
  -1   5  -2   68.04    2.15
   1  -5   2   65.85    2.22
  -2   5  -2   23.53    1.47
  -2   5  -2   25.36    1.40
   2  -5   2   24.87    1.36
  -3   5  -2   56.52    1.84
  -4   5  -2   33.36    1.47
   7   4  -2   19.83    2.37
  -7  -4   2   11.79    1.77
  -7  -4   2   10.13    1.66
   6   4  -2    2.14    1.60
  -6  -4   2   -0.17    1.24
  -6  -4   2    1.81    1.36
   5   4  -2   46.23    2.57
  -5  -4   2   49.22    2.30
  -5  -4   2   49.21    2.19
   4   4  -2   83.91    2.60
   4   4  -2   82.60    3.09
  -4  -4   2   86.59    2.81
  -4  -4   2   90.10    2.77
  -4  -4   2   83.48    2.60
   3   4  -2   74.51    2.63
   3   4  -2   72.47    2.38
  -3  -4   2   72.93    2.45
  -3  -4   2   69.43    2.42
   2   4  -2    3.61    0.70
   2   4  -2    5.05    1.05
  -2  -4   2    5.27    1.05
  -2  -4   2    4.86    0.97
   1   4  -2   21.62    1.48
   1   4  -2   23.66    1.53
  -1  -4   2   22.75    1.49
  -1  -4   2   23.77    1.42
   0   4  -2    0.36    0.83
   0   4  -2    0.36    0.73
   0  -4   2    0.60    0.79
   0  -4   2    0.34    0.74
  -1   4  -2   22.51    1.30
  -1   4  -2   24.21    1.34
   1  -4   2   23.98    1.35
  -2   4  -2    4.66    0.79
   2  -4   2    5.97    0.71
  -3   4  -2   70.54    1.96
  -7   4  -2   14.72    2.05
   7   3  -2   12.55    2.12
  -7  -3   2    7.56    1.67
  -7  -3   2    8.87    1.57
   6   3  -2   25.84    2.27
  -6  -3   2   27.34    2.00
  -6  -3   2   24.58    1.96
   5   3  -2   13.26    1.70
  -5  -3   2   10.54    1.35
  -5  -3   2    9.49    1.36
   4   3  -2   35.05    1.61
   4   3  -2   35.07    2.07
  -4  -3   2   36.92    1.75
  -4  -3   2   37.81    1.81
  -4  -3   2   40.79    1.85
   3   3  -2   84.18    2.51
   3   3  -2   83.46    2.80
  -3  -3   2   83.20    2.54
  -3  -3   2   87.60    2.62
  -3  -3   2   84.44    2.37
   2   3  -2    8.46    1.01
   2   3  -2    8.55    0.79
   2   3  -2    9.31    0.93
  -2  -3   2   10.25    1.00
  -2  -3   2    8.72    1.03
   1   3  -2  547.33   11.39
   1   3  -2  533.92   11.36
  -1  -3   2  526.25   11.35
  -1  -3   2  547.62   11.38
   0   3  -2   46.81    1.57
   0   3  -2   46.81    1.67
   0  -3   2   44.45    1.63
   0  -3   2   44.08    1.62
  -1   3  -2  541.87   11.16
  -1   3  -2  535.72   11.18
   1  -3   2  530.88   11.14
  -2   3  -2   12.51    1.13
  -2   3  -2   12.65    0.94
  -6   3  -2   23.89    2.13
  -7   3  -2    8.10    1.86
  -7  -2   2   17.20    1.96
  -7  -2   2   19.56    1.71
   6   2  -2    9.29    1.85
  -6  -2   2    8.91    1.39
  -6  -2   2    9.09    1.56
   5   2  -2   20.36    1.83
  -5  -2   2   15.57    1.32
  -5  -2   2   14.97    1.53
  -5  -2   2   15.65    1.40
   4   2  -2   22.19    1.25
   4   2  -2   21.45    1.78
  -4  -2   2   22.16    1.49
  -4  -2   2   20.05    1.50
  -4  -2   2   21.80    1.59
   3   2  -2   64.62    2.01
   3   2  -2   65.23    2.42
   3   2  -2   65.87    2.06
  -3  -2   2   69.07    2.18
  -3  -2   2   64.64    2.11
  -3  -2   2   67.23    2.16
   2   2  -2  148.97    3.57
   2   2  -2  152.73    3.84
   2   2  -2  147.96    3.55
  -2  -2   2  148.98    3.60
  -2  -2   2  145.36    3.28
   1   2  -2   39.38    1.12
   1   2  -2   42.56    1.51
   1   2  -2   43.81    1.54
  -1  -2   2   41.88    1.55
  -1  -2   2   41.59    1.54
   0   2  -2    6.58    0.65
   0   2  -2    8.00    0.64
   0  -2   2    8.26    0.69
   0  -2   2    8.22    0.66
  -1   2  -2   42.33    1.28
  -1   2  -2   42.44    1.26
   1  -2   2   41.95    1.24
  -2   2  -2  150.50    4.07
  -3   2  -2   62.74    2.65
  -6   2  -2    7.42    1.61
  -7   2  -2   19.91    2.18
  -7  -1   2    1.20    1.29
  -7  -1   2    2.60    1.56
   6   1  -2   33.74    2.54
  -6  -1   2   32.67    1.94
  -6  -1   2   31.72    2.20
   5   1  -2   25.11    2.15
  -5  -1   2   21.51    1.61
  -5  -1   2   23.10    1.75
  -5  -1   2   25.86    1.64
   4   1  -2    7.47    1.23
  -4  -1   2    7.14    0.92
  -4  -1   2    6.02    1.13
  -4  -1   2    6.18    1.12
  -4  -1   2    6.30    0.96
   3   1  -2   27.03    1.29
   3   1  -2   25.49    1.75
   3   1  -2   25.81    1.27
  -3  -1   2   22.67    1.49
  -3  -1   2   23.39    1.69
  -3  -1   2   23.77    1.41
  -3  -1   2   24.08    1.40
   2   1  -2  151.25    3.52
   2   1  -2  156.82    3.54
   2   1  -2  150.65    3.87
  -2  -1   2  156.05    3.59
  -2  -1   2  150.70    3.87
  -2  -1   2  150.19    3.57
   1   1  -2  427.99    9.07
   1   1  -2  434.09    9.66
   1   1  -2  440.45    9.09
  -1  -1   2  435.54    9.09
  -1  -1   2  435.48    9.10
  -1   1  -2  441.79   10.03
   1  -1   2  441.89   10.04
  -2   1  -2  158.29    4.18
   2  -1   2  155.10    4.27
  -3   1  -2   23.19    1.97
   3  -1   2   23.36    2.05
   4  -1   2    5.09    1.35
  -5   1  -2   27.37    2.06
   5  -1   2   27.97    2.30
  -6   1  -2   31.97    2.36
  -7   1  -2    3.54    1.59
  -7   0   2    5.01    1.60
  -7   0   2    3.93    1.26
  -6   0   2    5.18    1.44
  -6   0   2    2.47    1.15
  -5   0   2   50.72    2.00
  -5   0   2   49.52    2.38
   4   0  -2    6.79    1.24
  -4   0   2    5.93    0.90
   3   0  -2   35.89    1.99
   3   0  -2   39.32    1.37
  -3   0   2   39.03    1.52
  -3   0   2   40.16    1.56
  -3   0   2   37.15    1.98
   2   0  -2   -0.22    0.55
   2   0  -2    1.45    0.76
   2   0  -2    1.14    0.60
  -2   0   2    0.76    0.64
  -2   0   2    1.31    0.71
  -2   0   2    1.06    0.66
   1   0  -2  179.44    3.98
   1   0  -2  185.72    4.01
   1   0  -2  186.22    4.22
  -1   0   2  181.06    4.22
  -1   0   2  182.75    4.01
  -1   0   2  185.95    4.01
  -1   0  -2  179.68    4.40
  -1   0  -2  185.82    3.78
   1   0   2  182.47    4.43
  -2   0  -2    0.27    0.74
  -2   0  -2    0.02    0.71
   2   0   2   -0.14    0.90
  -3   0  -2   38.66    2.20
   3   0   2   38.18    2.16
  -4   0  -2    5.99    1.16
   4   0   2    5.43    1.31
  -5   0  -2   49.71    2.36
   5   0   2   48.01    2.81
  -6   0  -2    2.86    1.47
   6   0   2    4.77    1.82
  -7   0  -2    6.24    1.69
  -7   1   2   -0.57    1.13
  -7   1   2    2.53    1.59
  -6   1   2   32.20    2.37
  -6   1   2   36.12    1.86
  -5   1   2   22.20    1.49
  -4   1   2    5.37    0.84
  -3   1   2   22.15    1.76
  -3   1   2   23.74    1.26
   2  -1  -2  154.36    3.48
   2  -1  -2  155.19    3.49
  -2   1   2  153.63    3.99
  -2   1   2  155.75    3.54
   1  -1  -2  436.97    9.09
  -1   1   2  437.85    9.11
  -1  -1  -2  427.34    8.28
  -1  -1  -2  421.90    8.83
   1   1   2  430.88    8.82
   1   1   2  429.93    8.29
   1   1   2  428.34    9.73
  -2  -1  -2  158.37    3.58
  -2  -1  -2  151.81    3.40
  -2  -1  -2  153.59    3.40
  -2  -1  -2  155.35    4.13
   2   1   2  155.00    4.19
  -3  -1  -2   24.12    1.89
  -3  -1  -2   26.61    1.12
  -3  -1  -2   25.22    1.12
  -3  -1  -2   27.40    1.58
   3   1   2   22.92    1.86
  -4  -1  -2    6.96    0.74
  -4  -1  -2    7.21    0.73
  -4  -1  -2    6.15    1.15
   4   1   2    6.15    1.36
  -5  -1  -2   21.89    1.74
  -5  -1  -2   24.67    1.31
   5   1   2   24.38    2.17
  -6  -1  -2   32.05    2.29
   6   1   2   34.14    2.76
  -7  -1  -2    0.79    1.49
   7   1   2    3.03    1.92
  -7   2   2   19.30    2.20
  -6   2   2    7.65    1.16
  -5   2   2   15.92    1.33
  -4   2   2   18.52    1.23
   3  -2  -2   68.45    1.83
  -3   2   2   69.03    2.58
  -3   2   2   66.65    2.02
   2  -2  -2  150.99    3.45
  -2   2   2  150.44    3.51
   1  -2  -2   39.33    1.40
  -1   2   2   42.60    1.43
   0  -2  -2    7.50    0.64
   0   2   2    6.34    0.68
  -1  -2  -2   40.82    1.44
   1   2   2   40.17    1.41
   1   2   2   41.14    1.39
  -2  -2  -2  149.34    3.41
  -2  -2  -2  149.71    3.42
  -2  -2  -2  145.67    3.40
   2   2   2  141.48    3.33
   2   2   2  146.97    3.34
   2   2   2  151.04    3.45
   2   2   2  145.95    4.05
  -3  -2  -2   64.99    2.22
  -3  -2  -2   65.51    1.93
  -3  -2  -2   64.25    1.95
   3   2   2   67.89    2.69
  -4  -2  -2   23.27    1.64
  -4  -2  -2   19.89    1.23
  -4  -2  -2   19.93    1.23
   4   2   2   21.04    1.83
  -5  -2  -2   15.96    1.58
  -5  -2  -2   16.57    1.34
  -5  -2  -2   16.04    1.31
   5   2   2   19.72    2.04
  -6  -2  -2    9.36    1.56
  -6  -2  -2    8.04    1.15
   6   2   2    8.97    1.90
  -7  -2  -2   15.09    2.02
   7   2   2   26.60    2.69
  -6   3   2   25.33    1.59
  -5   3   2    9.99    1.06
  -4   3   2   34.95    1.52
   3  -3  -2   84.48    2.19
  -3   3   2   82.24    2.93
  -3   3   2   81.11    2.32
   2  -3  -2   11.54    0.88
  -2   3   2   11.20    0.93
   1  -3  -2  542.00   11.27
  -1   3   2  531.25   11.27
   0  -3  -2   44.89    1.59
   0   3   2   44.45    1.60
  -1  -3  -2  518.60   11.03
   1   3   2  525.56   11.03
   1   3   2  528.96   11.02
  -2  -3  -2    9.98    0.89
  -2  -3  -2   10.87    0.94
   2   3   2    9.11    0.86
   2   3   2   10.48    0.93
   2   3   2    9.41    0.94
  -3  -3  -2   83.69    2.41
  -3  -3  -2   84.68    2.52
  -3  -3  -2   83.41    2.41
   3   3   2   83.67    2.60
   3   3   2   79.57    2.98
   3   3   2   84.46    2.27
  -4  -3  -2   35.63    1.62
  -4  -3  -2   38.17    1.89
  -4  -3  -2   37.57    1.62
   4   3   2   34.21    2.23
  -5  -3  -2   10.82    1.46
  -5  -3  -2   10.50    1.19
   5   3   2   11.81    1.78
  -6  -3  -2   22.37    1.69
  -6  -3  -2   23.77    1.99
   6   3   2   28.84    2.54
  -7  -3  -2    7.98    1.77
   7   3   2   11.05    2.23
  -6   4   2    1.69    0.96
  -5   4   2   43.41    1.82
  -4   4   2   81.71    2.43
   3  -4  -2   69.23    2.03
  -3   4   2   70.96    2.17
   2  -4  -2    4.33    0.84
  -2   4   2    2.82    0.85
   1  -4  -2   25.85    1.45
  -1   4   2   23.36    1.42
   0  -4  -2    0.26    0.73
   0   4   2    1.80    0.83
  -1  -4  -2   24.22    1.46
   1   4   2   21.08    1.40
   1   4   2   21.13    1.44
  -2  -4  -2    4.08    0.91
   2   4   2    4.41    0.96
   2   4   2    3.28    0.84
  -3  -4  -2   72.02    2.30
  -3  -4  -2   72.72    2.30
   3   4   2   69.36    2.32
   3   4   2   70.55    2.20
   3   4   2   69.43    2.82
  -4  -4  -2   87.50    2.63
  -4  -4  -2   83.84    2.61
   4   4   2   81.08    3.26
  -5  -4  -2   45.68    2.23
  -5  -4  -2   48.99    2.08
   5   4   2   42.98    2.71
  -6  -4  -2    4.29    1.41
   6   4   2    2.57    1.68
   7   4   2   12.35    2.31
  -6   5   2    7.88    1.15
  -5   5   2   12.08    1.18
  -4   5   2   32.86    1.67
  -3   5   2   59.41    2.08
  -2   5   2   26.89    1.61
  -1   5   2   69.64    2.33
   0  -5  -2   14.55    1.13
   0   5   2   17.96    1.25
  -1  -5  -2   67.07    2.30
   1   5   2   67.27    2.33
  -2  -5  -2   22.86    1.58
   2   5   2   23.93    1.48
   2   5   2   23.57    1.64
  -3  -5  -2   60.55    2.24
   3   5   2   58.16    2.14
   3   5   2   57.35    2.68
   3   5   2   59.85    2.20
  -4  -5  -2   34.02    1.85
  -4  -5  -2   33.79    1.82
   4   5   2   32.35    1.67
   4   5   2   33.96    2.29
  -5  -5  -2   12.50    1.46
   5   5   2    8.56    1.75
   6   5   2    4.99    1.85
   7   5   2   10.28    2.28
  -6   6   2    2.09    1.06
  -5   6   2   -0.30    1.00
  -4   6   2   93.32    2.84
  -3   6   2   63.90    2.28
  -2   6   2    8.67    1.10
  -1   6   2   98.46    2.95
   0   6   2    6.44    1.13
   1   6   2   95.11    2.95
   2   6   2   10.37    1.24
   3   6   2   66.73    2.33
   3   6   2   62.01    2.37
   4   6   2   98.20    3.00
   4   6   2   95.86    3.67
   5   6   2    1.89    1.57
   6   6   2    1.66    1.79
   7   6   2    1.87    1.96
  -6   7   2    1.61    1.14
  -5   7   2   13.99    1.40
  -4   7   2   62.01    2.39
  -3   7   2   30.23    1.79
  -2   7   2    3.87    1.01
  -1   7   2   35.19    1.88
   0   7   2   94.00    3.02
   1   7   2   35.00    1.97
   2   7   2    5.20    1.19
   3   7   2   31.53    1.81
   3   7   2   29.77    1.90
   4   7   2   61.21    2.52
   4   7   2   62.21    3.04
   5   7   2   14.80    2.06
   6   7   2    1.81    1.79
   7   7   2    0.55    1.94
  -6   8   2    1.45    1.21
  -5   8   2   12.49    1.47
  -4   8   2   88.62    3.01
  -3   8   2   30.65    1.94
  -2   8   2   14.95    1.40
  -1   8   2   18.69    1.50
   0   8   2    0.29    1.04
   1   8   2   23.01    1.78
   2   8   2   16.50    1.56
   3   8   2   31.65    2.11
   4   8   2   92.20    3.23
   4   8   2   92.85    3.78
   5   8   2   13.87    2.08
   6   8   2    2.91    1.91
   7   8   2    2.26    1.99
  -6   9   2   10.67    1.53
  -5   9   2   21.77    1.77
  -4   9   2   16.67    1.61
  -3   9   2    2.07    1.19
  -2   9   2    2.43    1.16
  -1   9   2   17.32    1.52
   0   9   2   45.46    2.31
   1   9   2   19.64    1.71
   2   9   2    3.53    1.35
   3   9   2    3.28    1.37
   4   9   2   14.28    1.77
   5   9   2   21.88    2.40
   6   9   2   11.30    2.25
  -6  10   2   11.56    1.62
  -5  10   2   26.03    2.11
  -4  10   2    1.37    1.27
  -3  10   2   21.68    1.81
  -2  10   2    4.54    1.34
  -1  10   2    8.36    1.40
   0  10   2    8.90    1.47
   1  10   2    6.63    1.46
   2  10   2    5.90    1.52
   3  10   2   24.26    2.09
   4  10   2    3.37    1.48
   5  10   2   22.53    2.50
   6  10   2    7.04    2.16
  -6  11   2    8.25    1.68
  -5  11   2    3.18    1.46
  -4  11   2    1.29    1.35
  -3  11   2    2.32    1.35
  -2  11   2   42.58    2.48
  -1  11   2    8.99    1.54
   0  11   2   11.47    1.63
   1  11   2   14.50    1.79
   2  11   2   43.26    2.65
   3  11   2   -0.29    1.45
   4  11   2    1.05    1.54
   5  11   2   -0.38    1.87
   6  11   2    5.95    2.25
  -5  12   2   16.36    1.95
  -4  12   2    8.13    1.62
  -3  12   2   17.01    1.87
  -2  12   2   14.05    1.78
  -1  12   2    1.65    1.44
   0  12   2    9.04    1.67
   1  12   2    1.30    1.51
   2  12   2   18.68    2.08
   3  12   2   17.04    2.15
   4  12   2    7.40    1.79
   5  12   2   13.37    2.45
  -5  13   2    2.28    1.57
  -4  13   2    4.17    1.56
  -3  13   2    7.78    1.65
  -2  13   2   15.12    1.91
  -1  13   2    1.70    1.52
   0  13   2   -0.41    1.51
   1  13   2    4.50    1.76
   2  13   2   14.91    2.08
   3  13   2   15.57    2.20
   4  13   2    0.99    1.73
   5  13   2    0.34    2.08
  -4  14   2   12.00    1.93
  -3  14   2    4.37    1.63
  -2  14   2    3.45    1.61
  -1  14   2    2.45    1.58
   0  14   2    8.08    1.90
   1  14   2    0.71    1.68
   2  14   2    3.17    1.95
   3  14   2    4.02    2.03
   4  14   2   18.23    2.48
  -4  15   2    7.78    1.84
  -3  15   2    3.37    1.69
  -2  15   2    5.44    1.76
  -1  15   2    3.08    1.73
   0  15   2   13.56    2.17
   1  15   2    2.79    1.90
   2  15   2    5.92    2.08
   3  15   2    6.34    2.13
  -3  16   2    1.30    1.69
  -2  16   2   -1.15    1.62
  -1  16   2    3.61    1.84
   0  16   2    5.28    1.96
   1  16   2    2.76    2.04
   2  16   2   -0.26    1.97
   3  16   2    1.76    2.18
  -2  17   2    9.07    2.07
  -1  17   2    5.59    1.98
   0  17   2   16.71    2.43
   1  17   2    7.51    2.31
   2  17   2    9.35    2.42
   2  17  -3    6.56    2.16
   1  17  -3    7.34    2.18
   0  17  -3    6.77    2.10
  -1  17  -3    5.94    1.95
  -2  17  -3    3.56    1.85
   3  16  -3    6.62    2.25
   2  16  -3    3.99    2.06
   1  16  -3   -0.15    1.78
   0  16  -3    1.40    1.75
  -1  16  -3    0.89    1.65
  -2  16  -3    5.54    1.82
  -3  16  -3    8.26    1.93
   4  15  -3   -2.36    1.95
   3  15  -3    3.79    2.03
   2  15  -3    1.30    1.94
   1  15  -3   10.10    2.17
   0  15  -3   -1.03    1.60
  -1  15  -3    9.34    1.82
  -2  15  -3    0.34    1.54
  -3  15  -3    1.15    1.52
  -4  15  -3    1.28    1.60
   4  14  -3   13.63    2.31
   3  14  -3    0.49    1.98
   2  14  -3    0.05    1.79
   1  14  -3    7.15    1.89
   0  14  -3    7.76    1.81
  -1  14  -3    6.86    1.74
  -2  14  -3    4.17    1.54
  -3  14  -3    2.15    1.51
  -4  14  -3   12.37    1.87
   5  13  -3    9.22    2.19
   4  13  -3    4.27    1.85
   3  13  -3    2.75    1.81
   2  13  -3    2.27    1.76
   1  13  -3   56.67    3.09
   0  13  -3    2.75    1.62
  -1  13  -3   63.60    3.09
  -2  13  -3    0.34    1.34
  -3  13  -3    1.65    1.41
  -4  13  -3    6.59    1.60
  -5  13  -3   11.40    1.74
   5  12  -3   -0.80    1.77
   4  12  -3   21.40    2.35
   3  12  -3   -0.78    1.67
   2  12  -3   33.50    2.58
   1  12  -3   16.03    1.95
   0  12  -3    7.17    1.65
  -1  12  -3   15.50    1.81
  -2  12  -3   34.66    2.44
  -3  12  -3    1.49    1.33
  -4  12  -3   18.49    1.86
  -5  12  -3    3.27    1.42
   6  11  -3    0.81    1.89
   5  11  -3    7.96    2.00
  -5 -11   3    7.74    1.92
   4  11  -3    3.82    1.62
  -4 -11   3    3.85    1.67
   3  11  -3    7.03    1.80
  -3 -11   3    7.56    1.70
   2  11  -3   25.14    2.19
   1  11  -3   20.13    1.97
   0  11  -3   33.14    2.32
  -1  11  -3   21.49    1.90
  -2  11  -3   19.25    1.79
  -3  11  -3    8.17    1.45
  -4  11  -3    1.93    1.28
  -5  11  -3   12.32    1.59
   6  10  -3    2.89    1.86
  -6 -10   3    7.96    1.97
   5  10  -3    8.61    1.84
  -5 -10   3    9.79    1.91
   4  10  -3   19.15    2.07
  -4 -10   3   19.43    2.05
   3  10  -3   43.69    2.62
   3  10  -3   42.85    1.98
  -3 -10   3   39.58    2.48
   2  10  -3    7.70    1.61
  -2 -10   3   10.28    1.63
   1  10  -3   27.65    2.09
   0  10  -3    4.35    1.36
  -1  10  -3   33.16    2.15
  -2  10  -3    8.65    1.42
  -3  10  -3   41.11    2.25
  -4  10  -3   18.97    1.64
  -5  10  -3   11.41    1.47
   6   9  -3    2.88    1.85
  -6  -9   3    2.37    1.77
   5   9  -3    3.45    1.70
  -5  -9   3    5.04    1.66
   4   9  -3   11.52    1.77
  -4  -9   3   11.88    1.74
   3   9  -3    9.57    1.07
   3   9  -3    8.20    1.60
  -3  -9   3   11.12    1.60
   2   9  -3   37.65    2.31
  -2  -9   3   42.38    2.32
   1   9  -3   21.50    1.76
  -1  -9   3   18.80    1.69
   0   9  -3    4.63    1.22
  -1   9  -3   21.98    1.81
  -2   9  -3   37.22    2.09
  -3   9  -3   10.50    1.35
  -4   9  -3   12.25    1.37
  -5   9  -3    5.94    1.24
  -7  -8   3   -0.92    1.72
   6   8  -3    2.56    1.73
  -6  -8   3   -0.15    1.59
   5   8  -3    1.94    1.35
   5   8  -3    4.86    1.64
  -5  -8   3    2.52    1.59
   4   8  -3   14.58    1.35
   4   8  -3   15.84    1.75
  -4  -8   3   15.30    1.78
   3   8  -3   64.68    2.68
   3   8  -3   60.42    2.10
  -3  -8   3   62.99    2.71
   2   8  -3   47.65    2.34
  -2  -8   3   45.67    2.27
   1   8  -3    3.08    1.21
  -1  -8   3    4.32    1.19
   0   8  -3    3.75    1.16
  -1   8  -3    3.23    1.08
  -2   8  -3   45.08    2.08
  -3   8  -3   63.35    2.38
  -3   8  -3   64.44    2.44
  -4   8  -3   14.71    1.32
  -5   8  -3    2.73    1.05
  -7  -7   3   -0.12    1.66
   6   7  -3    2.37    1.66
  -6  -7   3    1.52    1.60
   5   7  -3   25.35    2.12
   5   7  -3   24.83    2.03
  -5  -7   3   24.87    2.03
   4   7  -3   10.35    1.51
   4   7  -3   10.73    1.50
  -4  -7   3    9.76    1.55
   3   7  -3   29.53    1.53
   3   7  -3   28.82    1.98
  -3  -7   3   26.34    1.92
   2   7  -3   40.98    2.13
  -2  -7   3   43.49    2.12
   1   7  -3   65.26    2.55
  -1  -7   3   63.32    2.46
   0   7  -3   35.24    1.98
   0  -7   3   31.90    1.87
  -1   7  -3   70.14    2.50
  -2   7  -3   40.78    1.93
  -2   7  -3   41.65    1.90
  -3   7  -3   26.06    1.62
  -3   7  -3   27.51    1.62
  -4   7  -3    9.57    1.10
  -5   7  -3   23.52    1.57
   7   6  -3    4.04    1.91
  -7  -6   3    4.26    1.77
   6   6  -3    4.65    1.66
  -6  -6   3    4.61    1.60
   5   6  -3   27.54    2.34
   5   6  -3   25.55    1.89
  -5  -6   3   25.38    2.09
   4   6  -3   61.17    2.50
   4   6  -3   58.59    2.66
  -4  -6   3   64.68    2.64
   3   6  -3   53.07    2.23
   3   6  -3   53.93    1.86
  -3  -6   3   51.23    2.31
   2   6  -3   23.69    1.26
   2   6  -3   24.06    1.80
  -2  -6   3   28.13    1.81
   1   6  -3   15.21    1.38
  -1  -6   3   17.03    1.43
   0   6  -3  252.39    5.98
   0  -6   3  252.59    5.93
  -1   6  -3   19.06    1.39
  -1   6  -3   19.46    1.29
  -2   6  -3   24.41    1.55
  -2   6  -3   25.91    1.53
  -3   6  -3   51.17    1.88
  -3   6  -3   56.48    1.96
  -4   6  -3   60.75    2.05
  -4   6  -3   58.90    2.01
  -5   6  -3   23.70    1.39
   7   5  -3    7.41    1.93
  -7  -5   3    7.38    1.72
   6   5  -3    1.26    1.53
  -6  -5   3    2.70    1.48
   5   5  -3    6.67    1.55
   5   5  -3    2.65    1.08
  -5  -5   3    6.67    1.46
   4   5  -3   -0.35    1.03
   4   5  -3   -1.07    1.02
  -4  -5   3    0.59    1.16
   3   5  -3   12.99    1.03
   3   5  -3    9.87    1.27
  -3  -5   3   12.38    1.32
   2   5  -3   94.34    2.34
   2   5  -3   94.86    2.97
  -2  -5   3   95.69    2.91
   1   5  -3  115.81    3.23
  -1  -5   3  109.34    3.19
   0   5  -3  133.13    3.54
   0   5  -3  133.41    3.50
   0  -5   3  134.80    3.48
   0  -5   3  132.84    3.48
  -1   5  -3  108.78    2.98
  -1   5  -3  109.49    2.94
   1  -5   3  109.32    2.95
  -2   5  -3   97.92    2.63
  -2   5  -3   95.77    2.66
   2  -5   3   93.14    2.54
  -3   5  -3   13.06    1.09
  -3   5  -3   13.33    0.99
  -4   5  -3    0.70    0.68
  -4   5  -3    0.46    0.59
   7   4  -3    8.10    2.00
  -7  -4   3    7.10    1.56
  -7  -4   3    7.08    1.67
   6   4  -3   16.65    1.98
  -6  -4   3   17.33    1.72
  -6  -4   3   17.69    1.76
   5   4  -3   32.17    2.22
   5   4  -3   38.63    1.83
  -5  -4   3   38.04    2.13
  -5  -4   3   40.01    1.98
   4   4  -3    5.93    1.06
   4   4  -3    8.68    1.28
  -4  -4   3    6.30    1.21
  -4  -4   3    6.45    1.05
   3   4  -3   25.82    1.64
   3   4  -3   28.61    1.78
  -3  -4   3   27.58    1.72
  -3  -4   3   30.07    1.75
   2   4  -3  178.42    4.37
   2   4  -3  176.43    3.75
  -2  -4   3  169.46    4.36
  -2  -4   3  176.40    4.41
   1   4  -3  200.95    4.68
   1   4  -3  192.38    4.69
  -1  -4   3  192.77    4.68
  -1  -4   3  198.37    4.69
   0   4  -3   42.71    1.78
   0   4  -3   42.79    1.69
   0  -4   3   44.85    1.77
   0  -4   3   41.72    1.73
  -1   4  -3  200.03    4.53
  -1   4  -3  201.22    4.54
   1  -4   3  189.30    4.50
  -2   4  -3  177.30    4.05
  -2   4  -3  179.03    4.09
   2  -4   3  175.62    3.95
  -3   4  -3   30.41    1.25
  -7   4  -3    9.01    1.84
   7   3  -3   12.99    2.15
  -7  -3   3   13.70    1.83
  -7  -3   3   15.19    1.75
   6   3  -3   -1.83    1.37
  -6  -3   3    0.34    1.31
  -6  -3   3    1.35    1.26
   5   3  -3   20.03    1.38
   5   3  -3   22.73    1.88
  -5  -3   3   19.78    1.58
  -5  -3   3   18.68    1.61
   4   3  -3   25.49    1.81
   4   3  -3   22.35    1.49
  -4  -3   3   21.32    1.47
  -4  -3   3   21.49    1.65
  -4  -3   3   20.47    1.70
   3   3  -3   10.97    1.10
   3   3  -3   12.56    1.16
  -3  -3   3   13.30    1.16
  -3  -3   3   11.46    1.02
  -3  -3   3    9.71    1.15
   2   3  -3   33.79    1.68
   2   3  -3   31.42    1.61
  -2  -3   3   32.05    1.66
  -2  -3   3   28.43    1.67
   1   3  -3  735.51   15.31
   1   3  -3  728.00   15.32
  -1  -3   3  743.15   15.34
  -1  -3   3  724.78   15.32
   0   3  -3   -0.10    0.68
   0   3  -3    1.67    0.78
   0  -3   3    0.16    0.76
   0  -3   3   -0.18    0.70
  -1   3  -3  723.09   15.05
  -1   3  -3  727.03   15.04
   1  -3   3  732.59   15.02
   1  -3   3  725.85   15.01
  -2   3  -3   33.31    1.19
  -2   3  -3   31.13    1.90
  -2   3  -3   31.03    1.23
  -6   3  -3    0.68    1.37
  -7   3  -3   14.59    2.00
  -7  -2   3    6.88    1.65
  -7  -2   3    5.37    1.51
   6   2  -3   55.48    2.94
  -6  -2   3   54.91    2.48
  -6  -2   3   56.15    2.65
   5   2  -3    1.25    1.19
  -5  -2   3   -0.71    1.10
  -5  -2   3    0.46    1.11
   4   2  -3   18.83    1.32
   4   2  -3   19.61    1.56
  -4  -2   3   18.58    1.54
  -4  -2   3   18.75    1.29
  -4  -2   3   16.90    1.31
   3   2  -3   26.98    1.49
   3   2  -3   28.39    1.67
  -3  -2   3   26.82    1.62
  -3  -2   3   27.80    1.46
  -3  -2   3   30.23    1.65
   2   2  -3   59.52    1.91
   2   2  -3   57.33    1.94
   2   2  -3   61.62    1.97
  -2  -2   3   56.39    1.68
  -2  -2   3   57.59    1.95
  -2  -2   3   57.39    1.96
   1   2  -3  330.44    7.08
   1   2  -3  331.05    7.07
  -1  -2   3  324.12    7.08
  -1  -2   3  320.83    7.07
   0   2  -3   49.39    1.59
   0   2  -3   51.06    1.64
   0  -2   3   50.42    1.60
   0  -2   3   51.01    1.61
  -1   2  -3  328.84    6.91
  -1   2  -3  322.60    7.69
  -1   2  -3  326.63    6.90
   1  -2   3  328.20    6.88
   1  -2   3  335.17    6.87
  -2   2  -3   59.18    2.27
   3  -2   3   28.66    2.08
  -5   2  -3    3.17    1.20
  -6   2  -3   54.50    2.81
  -7   2  -3    6.00    1.73
  -7  -1   3   15.02    1.96
  -7  -1   3   18.02    1.69
  -6  -1   3    6.36    1.47
  -6  -1   3    5.97    1.32
   5   1  -3    3.83    1.31
  -5  -1   3    3.90    1.21
  -5  -1   3    2.86    1.11
   4   1  -3   19.64    1.71
   4   1  -3   21.23    1.26
  -4  -1   3   18.44    1.49
  -4  -1   3   21.98    1.47
  -4  -1   3   21.44    1.63
  -4  -1   3   20.58    1.72
   3   1  -3    6.48    0.86
   3   1  -3    5.35    0.79
   3   1  -3    7.16    1.00
  -3  -1   3    4.64    0.94
  -3  -1   3    8.12    1.00
  -3  -1   3    5.80    0.92
   2   1  -3  183.14    4.52
   2   1  -3  184.92    4.26
   2   1  -3  192.34    4.30
  -2  -1   3  185.35    4.32
  -2  -1   3  189.47    4.35
  -2  -1   3  184.88    4.52
   1   1  -3  670.11   13.73
   1   1  -3  649.35   13.71
  -1  -1   3  666.84   13.73
  -1  -1   3  658.73   13.73
   0   1  -3  114.77    2.69
   0   1  -3  115.47    2.29
   0   1  -3  115.83    2.77
   0   1  -3  115.38    2.66
   0  -1   3  118.66    2.70
   0  -1   3  115.44    2.67
  -1   1  -3  660.80   14.91
  -1   1  -3  657.41   13.59
   1  -1   3  674.91   14.93
  -2   1  -3  186.65    4.83
   2  -1   3  186.25    4.91
  -3   1  -3    7.92    1.19
   3  -1   3    7.29    1.32
  -4   1  -3   19.70    1.56
   4  -1   3   24.13    1.96
  -5   1  -3    1.98    1.19
   5  -1   3    3.10    1.57
  -6   1  -3    6.57    1.54
  -7   1  -3   20.15    2.22
  -7   0   3    1.35    1.30
  -7   0   3    1.54    1.51
  -6   0   3    2.52    1.35
  -6   0   3    0.99    1.16
  -5   0   3    8.50    1.37
  -5   0   3    5.30    1.13
   4   0  -3   15.99    1.46
  -4   0   3   13.99    1.31
  -4   0   3   14.42    1.15
   3   0  -3   -0.08    0.65
   3   0  -3    1.40    0.72
   3   0  -3    0.69    0.88
  -3   0   3   -0.80    0.79
  -3   0   3   -0.67    0.91
   2   0  -3  361.92    7.71
   2   0  -3  358.80    7.70
   2   0  -3  362.01    8.29
  -2   0   3  360.32    7.74
  -2   0   3  362.15    8.29
   1   0  -3    5.58    0.73
   1   0  -3    4.93    0.62
  -1   0   3    5.36    0.73
  -1   0   3    5.31    0.46
   0   0  -3    0.60    0.37
   0   0   3    0.43    0.37
   0   0   3   -0.27    0.44
  -1   0  -3    6.16    0.70
  -1   0  -3    7.00    0.77
  -1   0  -3    6.38    0.48
   1   0   3    6.60    0.88
   1   0   3    5.34    0.69
  -2   0  -3  368.97    7.35
  -2   0  -3  358.90    8.55
   2   0   3  354.72    8.59
  -3   0  -3   -1.06    1.04
  -3   0  -3    0.55    0.86
   3   0   3   -0.35    1.08
  -4   0  -3   15.61    1.40
   4   0   3   15.47    1.68
  -5   0  -3    6.64    1.32
   5   0   3    8.02    1.69
  -6   0  -3   -0.07    1.31
   6   0   3    2.36    1.76
  -7   0  -3    1.55    1.52
  -7   1   3   17.00    2.02
  -7   1   3   16.54    1.59
  -6   1   3    5.70    1.23
  -6   1   3    9.21    1.57
  -5   1   3    3.75    1.02
  -4   1   3   19.86    1.36
  -4   1   3   21.14    1.56
   3  -1  -3    5.80    0.76
   3  -1  -3    5.40    0.78
  -3   1   3    7.27    1.01
  -3   1   3    5.98    0.88
   2  -1  -3  187.63    4.20
   2  -1  -3  181.83    4.19
  -2   1   3  185.23    4.23
  -2   1   3  186.57    4.59
   1  -1  -3  658.85   13.66
  -1   1   3  659.82   13.67
   0  -1  -3  116.33    2.74
   0   1   3  120.85    2.75
  -1  -1  -3  661.04   12.57
  -1  -1  -3  656.04   13.51
   1   1   3  666.16   13.51
   1   1   3  650.90   12.57
   1   1   3  651.59   14.75
  -2  -1  -3  190.48    4.84
  -2  -1  -3  187.33    4.08
  -2  -1  -3  187.29    4.15
   2   1   3  184.87    4.21
   2   1   3  186.98    4.92
  -3  -1  -3    5.90    0.64
  -3  -1  -3    6.45    0.65
  -3  -1  -3    6.70    1.09
  -3  -1  -3    5.76    1.00
   3   1   3    6.69    1.25
  -4  -1  -3   17.67    1.48
  -4  -1  -3   19.87    1.04
   4   1   3   23.05    1.92
  -5  -1  -3    2.58    1.20
   5   1   3    2.57    1.48
  -6  -1  -3    5.49    1.52
   6   1   3    9.73    1.98
  -7  -1  -3   17.90    2.07
   7   1   3   20.27    2.55
  -7   2   3    7.65    1.34
  -7   2   3    5.35    1.77
  -6   2   3   58.29    2.28
  -5   2   3    2.69    0.96
  -4   2   3   17.48    1.30
   3  -2  -3   26.30    1.27
   3  -2  -3   26.97    1.32
  -3   2   3   24.43    1.37
  -3   2   3   25.05    1.78
   2  -2  -3   59.40    1.89
  -2   2   3   61.47    1.93
   1  -2  -3  323.13    6.91
  -1   2   3  319.04    6.91
   0  -2  -3   52.34    1.67
   0   2   3   51.27    1.64
  -1  -2  -3  327.34    7.02
   1   2   3  329.81    7.01
  -2  -2  -3   60.42    1.74
  -2  -2  -3   58.91    1.89
   2   2   3   57.47    2.35
   2   2   3   56.34    1.93
   2   2   3   58.98    1.69
  -3  -2  -3   25.98    1.59
  -3  -2  -3   26.49    1.28
   3   2   3   26.38    1.97
  -4  -2  -3   16.20    1.16
  -4  -2  -3   17.78    1.42
  -4  -2  -3   16.45    1.18
   4   2   3   18.89    1.77
  -5  -2  -3    1.95    1.15
  -5  -2  -3    1.18    0.78
   5   2   3    2.71    1.50
  -6  -2  -3   60.98    2.82
   6   2   3   53.52    3.14
  -7  -2  -3    7.65    1.76
   7   2   3    8.27    2.13
  -6   3   3    0.70    1.01
  -5   3   3   17.93    1.48
  -4   3   3   22.83    1.39
   3  -3  -3   12.48    0.93
  -3   3   3   13.35    1.24
  -3   3   3    9.94    1.00
   2  -3  -3   35.05    1.58
  -2   3   3   32.80    1.56
   1  -3  -3  734.10   15.14
  -1   3   3  717.84   15.14
   0  -3  -3    0.48    0.70
   0   3   3    1.19    0.80
  -1  -3  -3  718.74   15.06
   1   3   3  726.35   15.06
  -2  -3  -3   30.15    1.50
   2   3   3   33.38    1.59
   2   3   3   31.29    2.02
   2   3   3   33.28    1.47
   2   3   3   32.11    1.48
  -3  -3  -3   10.64    0.95
  -3  -3  -3   10.35    1.11
   3   3   3   11.26    0.85
   3   3   3   14.88    1.47
   3   3   3   11.72    1.15
   3   3   3   10.49    0.88
  -4  -3  -3   18.18    1.45
  -4  -3  -3   18.81    1.37
   4   3   3   24.28    1.93
  -5  -3  -3   19.87    1.73
   5   3   3   22.42    2.12
  -6  -3  -3   -0.46    1.25
   6   3   3    0.08    1.67
  -7  -3  -3   11.09    1.92
   7   3   3   14.48    2.31
  -6   4   3   14.72    1.33
  -5   4   3   32.53    1.69
  -4   4   3    5.88    0.99
  -3   4   3   27.99    1.51
   2  -4  -3  182.67    4.31
  -2   4   3  176.89    4.32
   1  -4  -3  198.28    4.63
  -1   4   3  195.05    4.63
   0  -4  -3   43.82    1.82
   0   4   3   44.55    1.79
  -1  -4  -3  194.48    4.61
   1   4   3  196.10    4.61
  -2  -4  -3  175.76    4.30
   2   4   3  176.04    4.28
   2   4   3  182.63    4.12
  -3  -4  -3   29.93    1.56
   3   4   3   29.06    1.69
   3   4   3   26.82    1.48
   3   4   3   28.20    2.05
  -4  -4  -3    5.99    0.98
   4   4   3    8.23    1.48
   5   4   3   36.97    2.59
   6   4   3   13.34    2.15
   7   4   3    7.19    2.15
  -6   5   3   -0.80    1.00
  -5   5   3    5.27    1.08
  -4   5   3    0.21    0.91
  -3   5   3   12.41    1.14
  -2   5   3   93.56    2.79
  -1   5   3  108.42    3.04
   0  -5  -3  134.75    3.48
   0   5   3  128.42    3.46
  -1  -5  -3  111.68    3.09
   1   5   3  105.15    3.07
  -2  -5  -3   91.64    2.80
   2   5   3   92.70    2.78
  -3  -5  -3   12.75    1.17
   3   5   3   11.48    1.13
   3   5   3   11.86    1.17
   3   5   3   13.03    1.53
  -4  -5  -3    0.36    0.93
   4   5   3    0.64    0.85
   4   5   3   -0.84    1.22
   5   5   3    6.91    1.74
   6   5   3   -0.22    1.73
   7   5   3    3.88    2.02
  -6   6   3    5.00    1.18
  -5   6   3   29.48    1.82
  -4   6   3   55.74    2.24
  -3   6   3   51.85    2.08
  -2   6   3   23.51    1.65
  -1   6   3   15.00    1.30
   0   6   3  245.43    5.84
   1   6   3   15.41    1.38
   2   6   3   23.56    1.71
   3   6   3   51.80    2.20
   3   6   3   62.70    2.28
   4   6   3   58.32    2.94
   4   6   3   62.04    2.30
   5   6   3   29.20    2.57
   6   6   3    3.15    1.88
   7   6   3    4.09    2.06
  -6   7   3    3.09    1.18
  -5   7   3   25.10    1.85
  -4   7   3    9.05    1.28
  -3   7   3   27.41    1.76
  -2   7   3   39.09    1.93
  -1   7   3   58.61    2.30
   0   7   3   33.83    1.98
   1   7   3   63.25    2.38
   2   7   3   39.29    2.05
   3   7   3   28.18    1.86
   4   7   3   12.35    1.83
   4   7   3   13.50    1.45
   5   7   3   25.16    2.40
   6   7   3    2.92    1.90
   7   7   3   -0.70    1.98
  -6   8   3    3.37    1.27
  -5   8   3    3.73    1.30
  -4   8   3   11.33    1.43
  -3   8   3   58.43    2.44
  -2   8   3   40.53    2.04
  -1   8   3    3.40    1.10
   0   8   3    5.44    1.21
   1   8   3    2.85    1.17
   2   8   3   42.28    2.18
   3   8   3   63.55    2.64
   4   8   3   14.78    1.66
   4   8   3   14.32    1.97
   5   8   3    2.88    1.78
   6   8   3    3.71    1.96
  -6   9   3    0.94    1.31
  -5   9   3    4.22    1.35
  -4   9   3   12.46    1.54
  -3   9   3   10.39    1.40
  -2   9   3   31.96    2.00
  -1   9   3   18.84    1.61
   0   9   3    3.26    1.25
   1   9   3   16.77    1.60
   2   9   3   39.52    2.26
   3   9   3   11.37    1.66
   4   9   3   12.23    1.71
   5   9   3    4.08    1.85
   6   9   3   -0.67    1.86
  -6  10   3    7.05    1.57
  -5  10   3    9.83    1.61
  -4  10   3   15.86    1.68
  -3  10   3   42.26    2.38
  -2  10   3   10.06    1.44
  -1  10   3   31.51    2.13
   0  10   3    4.62    1.32
   1  10   3   30.52    2.19
   2  10   3   10.21    1.68
   3  10   3   41.13    2.57
   4  10   3   22.53    2.07
   5  10   3    5.83    2.02
   6  10   3    6.76    2.23
  -6  11   3    1.02    1.49
  -5  11   3   11.00    1.69
  -4  11   3    3.48    1.42
  -3  11   3    2.05    1.32
  -2  11   3   18.78    1.77
  -1  11   3   16.00    1.72
   0  11   3   27.13    2.25
   1  11   3   17.87    1.88
   2  11   3   19.17    2.06
   3  11   3    4.79    1.59
   4  11   3    0.60    1.51
   5  11   3    7.38    2.13
   6  11   3    4.08    2.19
  -5  12   3    2.11    1.48
  -4  12   3   18.36    1.90
  -3  12   3   -1.67    1.31
  -2  12   3   28.25    2.25
  -1  12   3   14.36    1.81
   0  12   3    6.68    1.67
   1  12   3   14.05    1.95
   2  12   3   27.27    2.37
   3  12   3    1.98    1.62
   4  12   3   18.86    2.26
   5  12   3   -0.70    1.99
  -5  13   3    7.84    1.78
  -4  13   3    3.64    1.54
  -3  13   3   -1.60    1.35
  -2  13   3    1.67    1.46
   0  13   3    2.01    1.60
   1  13   3   57.57    3.13
   2  13   3   -1.33    1.67
   3  13   3   -1.16    1.56
   4  13   3    2.68    1.76
   5  13   3    9.52    2.47
  -4  14   3   12.30    1.94
  -3  14   3    1.28    1.51
  -2  14   3    2.33    1.55
  -1  14   3    8.74    1.85
   0  14   3    8.61    1.89
   1  14   3    5.81    1.92
   2  14   3    1.70    1.85
   3  14   3   -0.31    1.71
   4  14   3   15.69    2.35
  -4  15   3    3.56    1.70
  -3  15   3    1.17    1.60
  -2  15   3   -0.52    1.58
  -1  15   3   10.51    2.01
   0  15   3    2.14    1.81
   1  15   3    9.45    2.12
   2  15   3    0.74    1.93
   3  15   3    3.13    2.01
  -3  16   3    6.99    1.92
  -2  16   3    3.42    1.80
  -1  16   3    3.04    1.82
   0  16   3   -0.33    1.74
   1  16   3    1.27    1.98
   2  16   3    3.18    2.08
   3  16   3    5.46    2.23
  -2  17   3    3.39    1.97
  -1  17   3    4.56    1.95
   0  17   3    3.77    2.05
   1  17   3    5.66    2.14
   2  17   3    5.61    2.33
   1  17  -4   11.33    2.26
   0  17  -4   12.70    2.28
  -1  17  -4   10.92    2.09
   3  16  -4    5.17    2.17
   2  16  -4   23.51    2.73
   1  16  -4   12.22    2.33
   0  16  -4    0.02    1.76
  -1  16  -4    8.41    1.96
  -2  16  -4   22.67    2.41
  -3  16  -4   -0.19    1.62
   4  15  -4    3.54    2.13
   3  15  -4    8.60    2.30
   2  15  -4   13.27    2.29
   1  15  -4   -1.06    1.70
   0  15  -4    3.34    1.78
  -1  15  -4   -0.32    1.56
  -2  15  -4   12.65    1.95
  -3  15  -4    3.44    1.67
  -4  15  -4    2.47    1.61
   4  14  -4    3.01    2.10
   3  14  -4   11.90    2.31
   2  14  -4    3.24    1.95
   1  14  -4   12.37    2.07
   0  14  -4    7.11    1.82
  -1  14  -4   12.12    1.95
  -2  14  -4    2.96    1.52
  -3  14  -4   11.57    1.83
  -4  14  -4    3.01    1.58
   5  13  -4    2.55    1.99
   4  13  -4    2.30    1.86
   3  13  -4    0.40    1.77
   2  13  -4    4.15    1.87
   1  13  -4    4.06    1.79
   0  13  -4   23.73    2.23
  -1  13  -4    2.90    1.51
  -2  13  -4    6.74    1.63
  -3  13  -4    2.85    1.44
  -4  13  -4    1.08    1.38
  -5  13  -4    5.53    1.54
   5  12  -4    5.21    2.02
  -5 -12   4    4.04    1.86
   4  12  -4    4.27    1.81
  -4 -12   4    6.73    1.79
   3  12  -4   15.07    2.17
  -3 -12   4   14.25    2.00
   2  12  -4   18.55    2.13
   1  12  -4   12.11    1.87
   0  12  -4   13.51    1.83
  -1  12  -4   12.35    1.71
  -2  12  -4   15.70    1.78
  -3  12  -4   10.27    1.61
  -4  12  -4    2.64    1.39
  -5  12  -4    2.87    1.37
  -6 -11   4    0.05    1.80
   5  11  -4    2.50    1.80
  -5 -11   4    1.84    1.74
   4  11  -4   22.02    2.26
  -4 -11   4   21.85    2.20
   3  11  -4   27.82    2.35
  -3 -11   4   28.31    2.37
   2  11  -4    1.78    1.55
  -2 -11   4    2.83    1.51
   1  11  -4   36.15    2.45
   0  11  -4   94.48    3.52
  -1  11  -4   39.82    2.42
  -2  11  -4    1.30    1.29
  -3  11  -4   32.98    2.28
  -4  11  -4   21.63    1.83
  -5  11  -4    0.45    1.23
  -6 -10   4    9.80    2.09
   5  10  -4    2.19    1.63
  -5 -10   4    2.63    1.69
   4  10  -4   13.12    1.91
  -4 -10   4   13.63    1.91
   3  10  -4    6.27    1.67
   3  10  -4    8.13    1.05
  -3 -10   4    5.60    1.60
   2  10  -4   11.00    1.72
  -2 -10   4   13.56    1.72
   1  10  -4    0.64    1.34
  -1 -10   4    0.44    1.23
   0  10  -4   10.27    1.51
  -1  10  -4   -0.43    1.12
  -2  10  -4   11.48    1.50
  -3  10  -4    5.55    1.29
  -4  10  -4   12.47    1.49
  -5  10  -4    2.20    1.19
   6   9  -4    2.83    1.79
  -6  -9   4    4.37    1.78
   5   9  -4   14.47    1.87
   5   9  -4   15.33    1.98
  -5  -9   4   13.54    1.96
   4   9  -4   23.77    2.07
  -4  -9   4   25.82    2.19
   3   9  -4    4.94    1.53
   3   9  -4    6.86    0.95
  -3  -9   4    5.43    1.53
   2   9  -4   38.03    2.35
  -2  -9   4   37.31    2.25
   1   9  -4   30.73    2.12
  -1  -9   4   28.14    2.02
   0   9  -4    9.90    1.40
  -1   9  -4   30.56    2.00
  -2   9  -4   44.50    2.23
  -3   9  -4    7.26    1.25
  -4   9  -4   26.10    1.87
  -5   9  -4   12.16    1.35
  -7  -8   4   -2.14    1.71
   6   8  -4    1.66    1.74
  -6  -8   4    1.63    1.74
   5   8  -4    8.86    1.65
   5   8  -4    8.09    1.70
  -5  -8   4   11.56    1.81
   4   8  -4   15.57    1.76
  -4  -8   4   15.06    1.75
   3   8  -4   11.54    1.60
   3   8  -4   11.64    1.03
  -3  -8   4   11.90    1.58
   2   8  -4   25.06    1.99
  -2  -8   4   25.76    1.95
   1   8  -4    5.72    1.27
  -1  -8   4    4.38    1.22
   0   8  -4    8.29    1.28
   0  -8   4    8.69    1.26
  -1   8  -4    2.82    1.08
  -2   8  -4   25.98    1.82
  -3   8  -4   11.59    1.12
  -3   8  -4   11.61    1.26
  -4   8  -4   13.64    1.29
  -5   8  -4   10.17    1.22
  -7  -7   4    3.96    1.84
   6   7  -4   -0.30    1.54
  -6  -7   4    0.03    1.61
   5   7  -4    7.99    1.50
   5   7  -4   11.02    1.61
  -5  -7   4    6.48    1.67
   4   7  -4    9.14    1.51
   4   7  -4   11.33    1.51
  -4  -7   4   12.31    1.67
   3   7  -4    2.99    0.77
   3   7  -4    2.83    1.26
  -3  -7   4    1.99    1.24
   2   7  -4   41.98    2.19
  -2  -7   4   43.10    2.13
   1   7  -4   95.52    3.12
  -1  -7   4   92.72    3.00
   0   7  -4   80.75    2.77
   0  -7   4   76.55    2.66
  -1   7  -4   97.65    3.05
  -2   7  -4   46.73    2.04
  -2   7  -4   43.98    1.93
  -3   7  -4    2.39    0.79
  -3   7  -4    2.66    0.94
  -4   7  -4    9.85    1.11
  -5   7  -4    7.10    1.05
  -7  -6   4   -1.15    1.58
   6   6  -4    2.70    1.60
  -6  -6   4    2.13    1.59
   5   6  -4    9.40    1.53
   5   6  -4    7.38    1.38
  -5  -6   4    7.61    1.59
   4   6  -4   37.46    2.19
   4   6  -4   39.33    2.16
  -4  -6   4   36.35    2.20
   3   6  -4    0.74    1.11
   3   6  -4    1.51    0.73
  -3  -6   4    2.73    1.17
   2   6  -4  126.42    3.61
   2   6  -4  121.42    2.83
  -2  -6   4  122.11    3.57
   1   6  -4   74.89    2.65
  -1  -6   4   75.47    2.57
   0   6  -4    6.12    1.15
   0  -6   4    5.61    1.12
  -1   6  -4   77.18    2.49
  -1   6  -4   74.73    2.52
  -2   6  -4  127.27    3.34
  -2   6  -4  125.43    3.38
  -3   6  -4    1.51    0.68
  -3   6  -4    2.56    0.84
  -4   6  -4   35.71    1.61
  -4   6  -4   38.55    1.61
  -7  -5   4    6.15    1.76
   6   5  -4    3.50    1.59
  -6  -5   4    1.61    1.50
   5   5  -4   16.12    1.68
   5   5  -4   14.94    1.45
  -5  -5   4   14.61    1.71
   4   5  -4    4.98    1.19
   4   5  -4    3.99    1.11
  -4  -5   4    3.49    1.24
   3   5  -4    2.07    1.07
  -3  -5   4    1.14    1.05
   2   5  -4   16.05    1.02
   2   5  -4   20.03    1.66
  -2  -5   4   18.10    1.47
   1   5  -4  292.36    6.67
  -1  -5   4  282.46    6.63
   0   5  -4    3.28    1.00
   0   5  -4    6.05    0.97
   0  -5   4    4.60    1.05
  -1   5  -4  285.97    6.43
  -1   5  -4  284.18    6.47
   1  -5   4  286.90    6.40
  -2   5  -4   17.90    1.34
  -2   5  -4   16.67    1.39
   2  -5   4   18.47    1.29
  -3   5  -4    2.12    0.74
  -3   5  -4    2.15    0.62
  -4   5  -4    3.13    0.65
  -4   5  -4    4.59    0.74
   7   4  -4    3.27    1.77
  -7  -4   4    2.93    1.56
  -7  -4   4    2.37    1.42
   6   4  -4    2.29    1.49
  -6  -4   4    0.65    1.45
  -6  -4   4    0.68    1.21
   5   4  -4    6.81    1.18
   5   4  -4   10.37    1.52
  -5  -4   4    9.87    1.51
  -5  -4   4    6.92    1.23
   4   4  -4   -0.28    0.95
   4   4  -4    0.73    0.98
  -4  -4   4    0.98    1.12
  -4  -4   4    1.96    0.89
   3   4  -4    3.34    1.03
   3   4  -4    4.58    0.93
  -3  -4   4    2.54    1.05
   2   4  -4  116.02    3.26
   2   4  -4  110.18    2.57
  -2  -4   4  109.04    3.21
  -2  -4   4  115.86    3.23
   1   4  -4  166.70    3.86
   1   4  -4  150.14    3.84
  -1  -4   4  147.90    3.87
  -1  -4   4  142.15    3.83
   0   4  -4  102.81    2.84
   0   4  -4  103.88    2.84
   0  -4   4  102.02    2.81
   0  -4   4  101.44    2.83
  -1   4  -4  144.23    3.58
  -1   4  -4  147.50    3.57
   1  -4   4  145.05    3.56
   1  -4   4  148.67    3.52
  -2   4  -4  118.27    3.62
  -2   4  -4  110.91    2.82
  -2   4  -4  110.00    2.86
   2  -4   4  111.43    2.70
  -3   4  -4    3.03    0.66
  -3   4  -4    3.43    0.58
  -6   4  -4    1.64    1.33
  -7   4  -4    3.40    1.62
   7   3  -4    5.12    1.79
  -7  -3   4    1.69    1.39
  -7  -3   4    0.34    1.47
   6   3  -4    0.22    1.47
  -6  -3   4    1.47    1.25
  -6  -3   4    0.51    1.36
   5   3  -4    9.03    1.11
   5   3  -4   12.60    1.56
  -5  -3   4   11.00    1.47
  -5  -3   4    8.12    1.28
   4   3  -4    2.53    0.98
   4   3  -4    2.24    0.93
  -4  -3   4    2.72    0.92
  -4  -3   4    2.93    0.98
  -4  -3   4    1.23    1.07
   3   3  -4  130.75    3.47
   3   3  -4  131.86    3.59
  -3  -3   4  126.78    3.07
  -3  -3   4  130.18    3.57
  -3  -3   4  128.87    3.54
   2   3  -4   56.69    2.13
  -2  -3   4   57.55    1.57
  -2  -3   4   60.25    2.21
  -2  -3   4   53.30    2.12
   1   3  -4  274.57    6.18
   1   3  -4  273.93    6.20
  -1  -3   4  276.68    6.20
  -1  -3   4  275.63    6.20
   0   3  -4  404.92    8.65
   0   3  -4  404.55    8.67
   0  -3   4  395.84    8.64
   0  -3   4  406.42    8.64
  -1   3  -4  285.45    6.10
  -1   3  -4  279.61    6.11
   1  -3   4  276.04    6.07
   1  -3   4  278.77    6.05
  -2   3  -4   55.24    1.64
  -2   3  -4   55.55    1.61
  -2   3  -4   52.67    2.38
  -6   3  -4    0.13    1.36
  -7   3  -4    2.71    1.52
  -7  -2   4    1.77    1.43
  -7  -2   4    1.08    1.47
   6   2  -4   12.18    1.79
  -6  -2   4   10.66    1.60
  -6  -2   4   11.70    1.60
   5   2  -4    4.40    1.35
   5   2  -4    4.48    0.90
  -5  -2   4    4.52    1.19
  -5  -2   4    3.50    1.25
   4   2  -4   13.44    1.30
   4   2  -4   10.98    1.06
  -4  -2   4   11.01    1.18
  -4  -2   4   10.47    1.15
  -4  -2   4   12.56    1.28
   3   2  -4   20.36    1.46
   3   2  -4   21.49    1.45
  -3  -2   4   21.28    1.59
  -3  -2   4   21.51    1.62
  -3  -2   4   19.63    1.31
   2   2  -4  143.57    3.56
   2   2  -4  137.56    3.51
   2   2  -4  140.60    3.52
  -2  -2   4  137.18    3.56
  -2  -2   4  136.37    3.04
  -2  -2   4  146.53    3.61
   1   2  -4   53.82    1.84
   1   2  -4   53.65    1.89
  -1  -2   4   50.54    1.85
  -1  -2   4   50.18    1.88
   0   2  -4   16.85    1.21
   0   2  -4   17.21    1.29
   0  -2   4   17.30    1.22
   0  -2   4   18.33    1.26
  -1   2  -4   50.69    1.59
  -1   2  -4   50.50    1.56
  -1   2  -4   50.49    2.12
   1  -2   4   52.70    1.53
  -2   2  -4  140.43    4.07
   2  -2   4  146.66    4.13
   3  -2   4   22.65    2.01
   4  -2   4   12.96    1.73
  -5   2  -4    4.61    1.31
  -6   2  -4   10.17    1.65
  -7   2  -4    3.35    1.54
  -7  -1   4    3.36    1.59
  -7  -1   4    5.41    1.50
  -6  -1   4    6.73    1.42
  -6  -1   4    9.02    1.42
   5   1  -4    3.35    1.25
  -5  -1   4    2.99    1.18
  -5  -1   4    0.38    1.11
   4   1  -4   10.09    1.19
   4   1  -4    6.31    0.90
  -4  -1   4    6.40    1.15
  -4  -1   4    8.66    1.06
  -4  -1   4    7.14    1.10
   3   1  -4    5.72    0.90
   3   1  -4    4.57    0.88
  -3  -1   4    3.67    0.99
  -3  -1   4    3.73    0.90
  -3  -1   4    4.66    0.94
   2   1  -4   95.40    2.61
   2   1  -4   98.95    2.71
   2   1  -4   97.77    2.65
  -2  -1   4   98.64    2.71
  -2  -1   4  100.46    2.72
   1   1  -4   12.86    0.96
   1   1  -4   12.43    0.86
  -1  -1   4   12.05    0.95
  -1  -1   4   12.10    0.98
   0   1  -4  205.75    4.59
   0   1  -4  200.07    4.54
   0   1  -4  204.59    4.00
   0   1  -4  206.32    4.76
   0  -1   4  212.21    4.02
   0  -1   4  208.40    4.58
  -1   1  -4   16.18    1.05
  -1   1  -4   13.93    0.90
  -1   1  -4   11.70    0.91
   1  -1   4   13.69    0.88
   1  -1   4   16.38    1.15
  -2   1  -4  105.90    2.74
  -2   1  -4   96.81    3.10
   2  -1   4  100.42    3.22
  -3   1  -4    4.94    0.92
   3  -1   4    5.55    1.25
  -4   1  -4    7.78    1.16
   4  -1   4   11.51    1.61
  -5   1  -4    2.37    1.13
   5  -1   4    1.17    1.55
  -6   1  -4    7.37    1.57
  -7   1  -4    4.12    1.70
  -7   0   4   10.83    1.77
  -7   0   4    8.53    1.51
  -6   0   4   10.23    1.64
  -6   0   4   10.78    1.45
  -5   0   4   10.09    1.29
   4   0  -4    2.95    0.76
  -4   0   4    0.83    0.97
  -4   0   4    2.03    0.92
   3   0  -4   10.60    0.95
  -3   0   4   11.63    1.06
  -3   0   4    9.97    1.08
   2   0  -4   15.18    0.97
   2   0  -4   15.16    1.05
  -2   0   4   13.73    1.17
  -2   0   4   16.18    1.09
   1   0  -4  140.31    3.36
   1   0  -4  141.32    3.40
  -1   0   4  144.46    3.41
   0   0  -4   12.46    1.01
   0   0   4   14.00    1.04
   0   0   4   13.24    0.92
  -1   0  -4  139.36    3.70
  -1   0  -4  147.35    3.15
  -1   0  -4  141.74    3.21
   1   0   4  142.61    3.75
   1   0   4  146.20    3.17
   1   0   4  141.25    3.18
  -2   0  -4   16.50    1.21
  -2   0  -4   17.09    1.50
   2   0   4   15.69    1.34
  -3   0  -4   11.53    1.09
   3   0   4   13.64    1.50
  -4   0  -4    3.27    1.00
   4   0   4    3.61    1.35
  -5   0  -4   10.39    1.47
   5   0   4   15.80    2.03
  -6   0  -4   10.53    1.69
   6   0   4   10.46    2.10
  -7   0  -4    8.68    1.78
  -7   1   4    6.57    1.68
  -7   1   4    6.00    1.38
  -6   1   4    6.98    1.35
  -5   1   4    2.56    1.05
   4  -1  -4    8.09    0.83
  -4   1   4    7.33    1.02
  -4   1   4    8.24    1.11
   3  -1  -4    5.32    0.85
  -3   1   4    5.21    0.93
  -3   1   4    4.56    0.99
   2  -1  -4   93.26    2.58
   2  -1  -4   99.17    2.59
  -2   1   4   93.66    2.69
  -2   1   4   97.84    2.58
   1  -1  -4   12.35    0.87
  -1   1   4   13.31    0.96
   0  -1  -4  205.16    4.59
   0   1   4  209.66    4.62
  -1  -1  -4   11.83    1.00
   1   1   4   11.95    1.00
   1   1   4   11.38    0.84
   1   1   4   15.92    1.14
  -2  -1  -4   99.63    2.56
  -2  -1  -4   98.47    2.37
  -2  -1  -4  100.06    3.00
   2   1   4   96.88    3.15
   2   1   4   94.91    2.68
  -3  -1  -4    5.36    0.64
  -3  -1  -4    3.62    0.92
   3   1   4    7.09    1.26
  -4  -1  -4    8.83    1.22
   4   1   4    7.92    1.50
  -5  -1  -4    1.34    1.16
   5   1   4    2.26    1.53
  -6  -1  -4    9.36    1.58
   6   1   4   12.40    2.17
  -7  -1  -4    2.94    1.52
   7   1   4    5.08    2.07
  -7   2   4    1.15    1.26
  -7   2   4    0.20    1.51
  -6   2   4    8.65    1.31
  -5   2   4    3.10    1.05
  -4   2   4   11.08    1.09
   3  -2  -4   18.40    1.26
  -3   2   4   19.05    1.59
  -3   2   4   20.45    1.39
   2  -2  -4  145.75    3.52
  -2   2   4  142.71    3.60
   1  -2  -4   52.68    1.86
  -1   2   4   55.33    1.85
   0  -2  -4   18.21    1.26
   0   2   4   15.71    1.24
  -1  -2  -4   50.98    1.69
   1   2   4   49.87    1.68
  -2  -2  -4  139.26    3.33
  -2  -2  -4  142.79    3.34
   2   2   4  139.12    3.25
   2   2   4  143.40    3.27
   2   2   4  139.23    3.41
   2   2   4  136.49    4.01
  -3  -2  -4   21.83    1.23
  -3  -2  -4   22.79    1.55
   3   2   4   22.63    1.64
   3   2   4   25.08    1.98
  -4  -2  -4   12.07    1.26
  -4  -2  -4   11.89    0.91
   4   2   4   12.17    1.63
  -5  -2  -4    4.63    1.23
  -5  -2  -4    5.12    0.85
   5   2   4    4.35    1.66
  -6  -2  -4   10.32    1.67
   6   2   4   12.60    2.20
  -7  -2  -4    0.20    1.49
   7   2   4   -1.67    1.90
  -7   3   4    3.84    1.30
  -6   3   4   -0.31    1.05
  -5   3   4    7.74    1.14
  -4   3   4    2.45    0.89
  -3   3   4  124.01    3.69
  -3   3   4  127.05    3.33
   2  -3  -4   56.18    1.96
  -2   3   4   55.10    2.00
   1  -3  -4  282.69    6.24
  -1   3   4  276.66    6.24
   0  -3  -4  396.54    8.58
   0   3   4  398.77    8.58
  -1  -3  -4  280.72    6.19
   1   3   4  276.50    6.17
  -2  -3  -4   54.44    1.84
   2   3   4   54.84    2.45
   2   3   4   53.74    1.83
   2   3   4   54.13    1.85
   2   3   4   57.38    2.00
  -3  -3  -4  128.65    3.19
   3   3   4  124.28    3.94
   3   3   4  124.03    3.38
   3   3   4  123.49    3.03
  -4  -3  -4    2.12    0.99
  -4  -3  -4    0.26    0.79
   4   3   4    0.87    1.30
  -5  -3  -4    8.39    1.39
   5   3   4    9.71    1.79
  -6  -3  -4    2.06    1.32
   6   3   4   -0.75    1.70
  -7  -3  -4    1.03    1.51
   7   3   4   -0.18    1.85
  -7   4   4    2.65    1.26
  -6   4   4    0.13    1.09
  -5   4   4    7.94    1.16
   4  -4  -4    1.63    0.70
  -4   4   4    2.00    0.93
  -3   4   4    2.64    0.91
  -2   4   4  111.38    3.09
   1  -4  -4  147.89    3.76
  -1   4   4  149.70    3.75
   0  -4  -4  101.43    2.83
   0   4   4  100.32    2.82
  -1  -4  -4  145.73    3.65
   1   4   4  141.56    3.64
  -2  -4  -4  114.09    3.09
   2   4   4  113.36    3.08
   2   4   4  113.77    3.02
  -3  -4  -4    2.87    0.88
   3   4   4    4.25    1.25
   3   4   4    3.54    0.93
   3   4   4    2.95    0.81
  -4  -4  -4    0.18    0.86
   4   4   4    2.45    1.36
   5   4   4    9.93    1.88
   6   4   4   -2.04    1.66
   7   4   4    0.19    1.95
  -7   5   4    5.25    1.30
  -6   5   4    1.21    1.13
  -5   5   4   14.21    1.36
  -4   5   4    3.22    1.04
  -3   5   4    1.95    0.91
  -2   5   4   17.24    1.31
  -1   5   4  279.23    6.43
   0   5   4    3.98    1.05
  -1  -5  -4  195.78    5.39
   1   5   4  263.76    5.49
  -2  -5  -4   19.11    1.54
   2   5   4   18.57    1.54
  -3  -5  -4    1.83    0.90
   3   5   4   -0.17    1.16
   3   5   4    1.94    0.92
   3   5   4    1.22    0.85
  -4  -5  -4    2.67    1.02
   4   5   4    3.03    0.93
   4   5   4    2.32    1.40
   5   5   4   18.63    2.20
   6   5   4    0.19    1.78
   7   5   4    0.38    1.99
  -6   6   4    0.01    1.11
  -5   6   4    8.40    1.28
  -4   6   4   35.63    1.96
  -3   6   4    1.37    0.98
  -2   6   4  127.22    3.52
  -1   6   4   70.30    2.50
   0   6   4    4.02    1.09
   1   6   4   68.88    2.46
   2   6   4  118.16    3.35
   3   6   4    2.56    1.00
   4   6   4   32.33    2.44
   4   6   4   34.62    1.84
   5   6   4    9.75    1.91
   6   6   4    0.78    1.79
   7   6   4   -1.16    1.91
  -6   7   4    0.50    1.17
  -5   7   4    5.90    1.32
  -4   7   4   10.15    1.34
  -3   7   4    5.68    1.15
  -2   7   4   39.51    2.01
  -1   7   4   93.07    2.99
   0   7   4   75.09    2.66
   1   7   4   89.25    2.95
   2   7   4   48.01    2.16
   3   7   4    3.25    1.09
   4   7   4    6.35    1.70
   4   7   4   12.67    1.45
   5   7   4    7.83    1.95
   6   7   4    0.52    1.84
   7   7   4    0.17    2.01
  -6   8   4   -0.48    1.27
  -5   8   4    9.27    1.45
  -4   8   4   14.54    1.55
  -3   8   4   10.84    1.38
  -2   8   4   25.10    1.83
  -1   8   4    4.84    1.11
   0   8   4    4.05    1.17
   1   8   4    3.88    1.21
   2   8   4   22.78    1.74
   3   8   4   12.48    1.51
   4   8   4   12.83    1.60
   4   8   4   13.04    2.01
   5   8   4    7.88    1.98
   6   8   4    2.09    1.99
  -6   9   4    3.52    1.46
  -5   9   4   13.26    1.67
  -4   9   4   27.09    2.04
  -3   9   4    4.37    1.28
  -2   9   4   39.74    2.25
  -1   9   4   28.55    1.94
   0   9   4    9.09    1.39
   1   9   4   31.62    2.08
   2   9   4   44.10    2.40
   3   9   4    3.85    1.33
   4   9   4   26.88    2.19
   5   9   4   14.73    2.28
   6   9   4    2.64    2.00
  -6  10   4    9.49    1.67
  -5  10   4    0.55    1.37
  -4  10   4   10.01    1.59
  -3  10   4    6.74    1.42
  -2  10   4   11.48    1.54
  -1  10   4   -0.84    1.16
   0  10   4    7.65    1.45
   1  10   4    2.80    1.40
   2  10   4   11.84    1.70
   3  10   4    5.52    1.62
   4  10   4   13.95    1.88
   5  10   4   -0.25    1.86
   6  10   4    4.33    2.22
  -6  11   4    1.34    1.54
  -5  11   4    2.30    1.47
  -4  11   4   19.54    1.92
  -3  11   4   28.50    2.21
  -2  11   4    3.11    1.39
  -1  11   4   35.36    2.31
   0  11   4   93.29    3.49
   1  11   4   40.48    2.54
   2  11   4    0.73    1.56
   3  11   4   31.65    2.46
   4  11   4   22.87    2.22
   5  11   4    2.15    1.97
   6  11   4   -0.18    2.09
  -5  12   4    1.87    1.55
  -4  12   4    5.86    1.61
  -3  12   4   11.02    1.71
  -2  12   4    9.99    1.66
  -1  12   4    9.76    1.68
   0  12   4   10.73    1.77
   1  12   4    8.01    1.75
   2  12   4   11.01    1.92
   3  12   4   13.25    2.05
   4  12   4    3.61    1.72
   5  12   4    1.05    2.05
  -5  13   4    4.36    1.69
  -4  13   4    0.89    1.52
  -3  13   4    1.54    1.49
  -2  13   4    6.49    1.66
  -1  13   4   -0.80    1.45
   0  13   4   24.01    2.25
   1  13   4    1.45    1.71
   2  13   4    5.21    1.84
   3  13   4   -1.87    1.52
   4  13   4    0.05    1.68
   5  13   4    4.62    2.32
  -4  14   4    3.22    1.70
  -3  14   4   10.76    1.84
  -2  14   4    5.04    1.68
  -1  14   4   14.04    1.93
   0  14   4    2.03    1.64
   1  14   4   12.93    2.13
   2  14   4    7.12    2.00
   3  14   4   10.34    2.20
  -4  15   4    4.45    1.83
  -3  15   4    6.37    1.79
  -2  15   4    8.06    1.90
  -1  15   4   -1.32    1.64
   0  15   4    3.82    1.77
   1  15   4    0.32    1.81
   2  15   4   12.12    2.29
   3  15   4    2.33    1.89
  -3  16   4   -0.59    1.61
  -1  16   4    7.15    1.99
   0  16   4    1.27    1.84
   1  16   4    4.65    2.08
   2  16   4   20.94    2.60
   3  16   4    3.47    2.09
  -1  17   4    7.08    2.13
   0  17   4    8.78    2.18
   1  17   4    8.27    2.33
   1  17  -5    1.72    2.03
   0  17  -5   -0.23    1.88
  -1  17  -5   -0.93    1.65
   3  16  -5    2.96    2.21
   2  16  -5   16.06    2.50
   1  16  -5    5.24    2.11
   0  16  -5   21.14    2.43
  -1  16  -5    2.83    1.77
  -2  16  -5   18.19    2.18
  -3  16  -5    1.93    1.70
   3  15  -5    2.10    2.09
   2  15  -5   12.90    2.34
   1  15  -5    7.71    2.03
   0  15  -5    0.65    1.65
  -1  15  -5    6.66    1.86
  -2  15  -5   11.29    1.97
  -3  15  -5    3.59    1.65
   4  14  -5    1.73    2.03
   3  14  -5    8.17    2.14
   2  14  -5    3.19    1.90
   1  14  -5   14.72    2.18
   0  14  -5   10.06    1.89
  -1  14  -5   16.46    2.07
  -2  14  -5    2.27    1.54
  -3  14  -5    7.38    1.66
  -4  14  -5   -0.25    1.42
   4  13  -5    3.15    2.00
   3  13  -5   -0.14    1.78
   2  13  -5   10.18    2.01
   1  13  -5   11.84    2.01
   0  13  -5   53.06    2.96
  -1  13  -5   13.89    1.94
  -2  13  -5    8.59    1.64
  -3  13  -5    1.70    1.36
  -4  13  -5    3.98    1.48
  -5  13  -5    5.70    1.59
   5  12  -5   -0.88    1.75
  -5 -12   5   -0.61    1.71
   4  12  -5   12.83    2.16
  -4 -12   5   12.81    2.00
   3  12  -5    2.80    1.81
  -3 -12   5    1.82    1.67
   2  12  -5    5.36    1.77
  -2 -12   5    7.75    1.70
   1  12  -5   57.73    2.95
   0  12  -5   -0.30    1.39
  -1  12  -5   52.50    2.81
  -2  12  -5    6.00    1.50
  -3  12  -5    7.95    1.56
  -4  12  -5   11.59    1.64
  -5  12  -5   -1.25    1.27
  -6 -11   5    2.85    1.93
   5  11  -5   11.58    2.00
  -5 -11   5   11.60    2.06
   4  11  -5    5.10    1.85
  -4 -11   5    3.79    1.74
   3  11  -5   40.66    2.76
  -3 -11   5   40.28    2.64
   2  11  -5   44.80    2.70
  -2 -11   5   44.70    2.64
   1  11  -5   16.38    1.91
  -1 -11   5   22.12    2.00
   0  11  -5   34.34    2.40
  -1  11  -5   17.95    1.82
  -2  11  -5   46.01    2.52
  -3  11  -5   35.87    2.27
  -4  11  -5    3.76    1.32
  -5  11  -5    8.85    1.51
  -6 -10   5   -1.34    1.75
   5  10  -5    0.36    1.60
  -5 -10   5    2.44    1.70
   4  10  -5   19.21    2.12
  -4 -10   5   19.55    2.08
   3  10  -5    4.36    0.90
   3  10  -5    0.60    1.55
  -3 -10   5    2.64    1.49
   2  10  -5   29.02    2.33
  -2 -10   5   27.25    2.14
   1  10  -5    3.81    1.39
  -1 -10   5    3.77    1.37
   0  10  -5   -0.54    1.17
  -1  10  -5    2.12    1.22
  -2  10  -5   23.95    2.00
  -3  10  -5    3.33    1.25
  -4  10  -5   17.65    1.59
  -5  10  -5    2.14    1.19
  -6  -9   5    8.85    1.99
   5   9  -5    9.96    1.80
   5   9  -5    9.59    1.73
  -5  -9   5    6.76    1.78
   4   9  -5   19.56    1.97
  -4  -9   5   13.49    1.89
   3   9  -5   32.84    2.43
   3   9  -5   39.43    1.68
  -3  -9   5   41.82    2.44
   2   9  -5   34.54    2.31
  -2  -9   5   38.17    2.24
   1   9  -5    5.36    1.39
  -1  -9   5    3.30    1.32
   0   9  -5    4.32    1.23
   0  -9   5    4.58    1.24
  -1   9  -5    4.14    1.20
  -2   9  -5   38.75    2.14
  -3   9  -5   38.85    2.12
  -4   9  -5   16.48    1.46
  -5   9  -5    7.60    1.26
   6   8  -5   12.25    1.94
  -6  -8   5   11.82    2.00
   5   8  -5   25.86    2.30
   5   8  -5   25.65    2.09
  -5  -8   5   29.33    2.37
   4   8  -5   29.46    2.25
   4   8  -5   29.45    2.24
  -4  -8   5   22.62    2.05
   3   8  -5   30.77    1.51
   3   8  -5   34.84    2.27
  -3  -8   5   31.98    2.24
   2   8  -5   58.75    2.56
  -2  -8   5   60.51    2.60
   1   8  -5   12.60    1.46
  -1  -8   5   12.60    1.49
   0   8  -5   -0.06    1.06
   0  -8   5    0.43    1.06
  -1   8  -5   13.57    1.42
  -2   8  -5   60.02    2.42
  -3   8  -5   34.39    1.88
  -3   8  -5   34.58    1.92
  -4   8  -5   30.19    1.85
  -5   8  -5   27.47    1.74
  -7  -7   5    8.81    1.99
   6   7  -5   20.68    2.12
  -6  -7   5   22.71    2.24
   5   7  -5    4.22    1.38
   5   7  -5    4.48    1.53
  -5  -7   5    6.18    1.64
   4   7  -5    5.65    1.44
   4   7  -5    2.47    1.28
  -4  -7   5    3.04    1.42
   3   7  -5   75.35    2.16
   3   7  -5   70.04    2.80
  -3  -7   5   75.92    2.93
   2   7  -5   41.08    1.45
   2   7  -5   42.79    2.23
  -2  -7   5   44.98    2.21
   1   7  -5    9.05    1.34
  -1  -7   5   12.15    1.39
   0   7  -5    0.91    1.05
   0  -7   5   -0.40    0.98
  -1   7  -5   11.13    1.30
  -2   7  -5   45.32    2.00
  -2   7  -5   43.66    1.90
  -3   7  -5   73.95    2.50
  -3   7  -5   77.38    2.49
  -4   7  -5    3.63    0.96
  -5   7  -5    5.82    0.99
  -7  -6   5    6.84    1.89
   6   6  -5    2.55    1.54
  -6  -6   5    3.40    1.66
   5   6  -5   37.65    2.37
   5   6  -5   37.63    2.22
  -5  -6   5   38.33    2.47
   4   6  -5   16.59    1.61
   4   6  -5   15.13    1.50
  -4  -6   5   14.12    1.67
   3   6  -5    9.02    1.36
  -3  -6   5   10.11    1.43
   2   6  -5   31.13    1.93
   2   6  -5   34.14    1.23
  -2  -6   5   33.50    1.96
   1   6  -5   26.85    1.83
  -1  -6   5   28.43    1.87
   0   6  -5    7.44    1.18
   0  -6   5    8.19    1.21
  -1   6  -5   31.21    1.70
  -1   6  -5   26.21    1.76
   1  -6   5   29.29    1.65
  -2   6  -5   35.52    1.74
  -2   6  -5   33.31    1.65
  -3   6  -5    9.35    1.01
  -3   6  -5    8.80    0.90
  -4   6  -5   15.89    1.29
  -4   6  -5   15.51    1.29
  -7  -5   5   11.17    1.91
   6   5  -5   22.48    2.12
  -6  -5   5   28.10    2.31
   5   5  -5    1.51    1.29
   5   5  -5    3.45    1.15
  -5  -5   5    1.69    1.42
   4   5  -5   22.84    1.85
   4   5  -5   24.52    1.79
  -4  -5   5   25.83    1.97
   3   5  -5   77.63    2.74
  -3  -5   5   81.00    2.78
   2   5  -5   70.18    2.56
   2   5  -5   68.03    1.77
  -2  -5   5   72.57    2.57
   1   5  -5   58.16    2.27
  -1  -5   5   56.97    2.27
   0   5  -5   17.64    1.27
   0   5  -5   23.59    1.70
   0  -5   5   19.61    1.59
  -1   5  -5   53.25    2.07
  -1   5  -5   51.70    2.02
   1  -5   5   51.90    1.96
  -2   5  -5   71.08    2.25
  -2   5  -5   69.36    2.16
  -3   5  -5   83.56    2.32
  -3   5  -5   77.43    2.26
  -4   5  -5   24.36    1.28
  -4   5  -5   25.41    1.25
  -7  -4   5    2.31    1.39
  -7  -4   5    0.44    1.58
   6   4  -5   -0.56    1.39
  -6  -4   5   -1.13    1.15
  -6  -4   5   -0.10    1.44
   5   4  -5   27.95    1.82
   5   4  -5   28.66    2.14
  -5  -4   5   30.72    2.17
  -5  -4   5   26.49    1.76
   4   4  -5   13.52    1.37
   4   4  -5   12.98    1.30
  -4  -4   5   12.27    1.12
  -4  -4   5    9.96    1.42
   3   4  -5   47.78    1.96
   3   4  -5   47.99    2.10
  -3  -4   5   52.00    2.23
   2   4  -5   18.47    1.40
  -2  -4   5   17.02    1.40
   1   4  -5  104.55    3.02
  -1  -4   5  101.60    3.02
  -1  -4   5  101.04    2.97
   0   4  -5   18.05    1.20
   0   4  -5   18.78    1.25
   0  -4   5   20.83    1.28
   0  -4   5   20.64    1.33
  -1   4  -5  105.89    2.85
  -1   4  -5  106.19    2.83
   1  -4   5  103.87    2.78
   1  -4   5  104.44    2.80
  -2   4  -5   19.84    1.31
  -2   4  -5   19.64    1.27
  -2   4  -5   25.47    1.64
   2  -4   5   19.83    1.17
  -3   4  -5   51.93    1.60
  -3   4  -5   50.04    1.61
  -6   4  -5   -2.20    1.09
  -7  -3   5    2.53    1.58
  -7  -3   5    1.81    1.37
   6   3  -5   28.44    2.30
  -6  -3   5   25.49    2.04
  -6  -3   5   23.18    1.84
   5   3  -5   58.43    2.26
   5   3  -5   60.63    2.58
  -5  -3   5   57.54    2.32
  -5  -3   5   62.40    2.62
   4   3  -5   82.69    2.78
   4   3  -5   78.78    2.63
  -4  -3   5   81.98    2.86
  -4  -3   5   81.80    2.47
   3   3  -5   11.52    1.03
   3   3  -5    9.29    1.15
  -3  -3   5    8.76    0.88
  -3  -3   5   11.63    1.21
  -3  -3   5    9.99    1.21
   2   3  -5  203.14    4.89
  -2  -3   5  203.32    4.08
  -2  -3   5  201.71    4.93
  -2  -3   5  198.16    4.91
   1   3  -5   36.63    1.76
   1   3  -5   38.37    1.74
  -1  -3   5   40.05    1.84
  -1  -3   5   38.44    1.84
   0   3  -5   36.44    1.61
   0   3  -5   34.38    1.58
   0  -3   5   34.61    1.65
   0  -3   5   35.99    1.65
  -1   3  -5   40.36    1.56
  -1   3  -5   35.91    1.89
  -1   3  -5   37.66    1.54
   1  -3   5   38.89    1.52
   1  -3   5   38.16    1.48
  -2   3  -5  202.36    5.41
  -2   3  -5  204.43    4.50
  -2   3  -5  198.31    4.51
  -5   3  -5   61.19    2.64
  -6   3  -5   24.16    2.08
  -7   3  -5    3.55    1.58
  -7  -2   5    8.41    1.70
  -7  -2   5    8.51    1.62
  -6  -2   5    7.46    1.53
  -6  -2   5    5.57    1.42
   5   2  -5   37.29    1.76
   5   2  -5   38.52    2.25
  -5  -2   5   34.18    2.10
  -5  -2   5   38.79    1.99
   4   2  -5   29.60    1.66
   4   2  -5   25.76    1.74
  -4  -2   5   23.88    1.51
  -4  -2   5   29.76    1.81
  -4  -2   5   26.08    1.70
   3   2  -5   34.14    1.59
   3   2  -5   30.68    1.68
  -3  -2   5   31.33    1.48
  -3  -2   5   36.91    1.86
  -3  -2   5   34.74    1.80
   2   2  -5  197.28    4.75
   2   2  -5  193.71    4.69
  -2  -2   5  198.54    4.77
  -2  -2   5  206.47    4.85
   1   2  -5  137.92    3.48
   1   2  -5  142.96    3.56
  -1  -2   5  143.92    3.59
  -1  -2   5  140.77    3.57
   0   2  -5  985.64   20.39
   0   2  -5  977.03   20.37
   0   2  -5 1000.00   18.48
   0  -2   5  986.30   20.38
   0  -2   5  980.73   20.36
  -1   2  -5  137.41    3.80
  -1   2  -5  146.49    3.36
  -1   2  -5  137.93    3.31
   1  -2   5  143.32    3.29
  -2   2  -5  199.37    4.42
  -2   2  -5  200.86    5.36
  -2   2  -5  203.96    4.41
   2  -2   5  204.92    5.39
   3  -2   5   32.14    2.21
  -4   2  -5   27.15    1.76
   4  -2   5   30.43    2.27
  -5   2  -5   37.39    2.19
  -6   2  -5    8.57    1.60
  -7   2  -5    8.26    1.81
  -7  -1   5    5.71    1.57
  -7  -1   5    2.43    1.50
  -6  -1   5   -0.82    1.28
  -6  -1   5    0.11    1.24
   5   1  -5    9.64    1.02
  -5  -1   5    9.28    1.39
  -5  -1   5    9.28    1.37
   4   1  -5    4.52    0.92
   4   1  -5    3.40    1.01
  -4  -1   5    4.87    1.06
  -4  -1   5    3.65    1.07
   3   1  -5   92.72    2.67
   3   1  -5   91.04    2.70
  -3  -1   5   91.90    2.76
  -3  -1   5   89.90    2.77
  -3  -1   5   92.34    2.72
   2   1  -5   16.84    1.18
   2   1  -5   14.88    1.07
  -2  -1   5   14.38    1.16
  -2  -1   5   14.62    1.18
   1   1  -5  119.15    3.09
   1   1  -5  117.62    3.04
  -1  -1   5  119.51    3.11
  -1  -1   5  118.32    3.08
   0   1  -5  245.60    5.32
   0   1  -5  236.21    5.33
   0   1  -5  232.96    5.52
   0  -1   5  245.78    5.34
   0  -1   5  236.94    5.53
   0  -1   5  241.24    4.69
  -1   1  -5  119.11    2.82
  -1   1  -5  119.33    2.77
  -1   1  -5  116.13    3.28
   1  -1   5  117.48    2.79
   1  -1   5  121.03    3.36
  -2   1  -5   14.98    1.17
  -2   1  -5   18.25    1.37
  -2   1  -5   15.51    0.86
   2  -1   5   20.56    1.55
  -3   1  -5   88.10    2.67
   3  -1   5   89.92    3.25
  -4   1  -5    4.20    0.97
   4  -1   5    4.55    1.47
  -5   1  -5    8.98    1.40
   5  -1   5    8.49    1.84
  -6   1  -5    1.18    1.35
   6  -1   5   -0.46    1.75
  -7   1  -5    4.88    1.64
  -7   0   5    8.73    1.70
  -7   0   5    6.52    1.57
  -6   0   5    5.65    1.38
  -6   0   5    4.97    1.46
  -5   0   5   10.66    1.36
   4   0  -5   51.51    1.87
  -4   0   5   53.66    2.09
  -4   0   5   54.97    2.23
   3   0  -5    0.97    0.84
  -3   0   5    0.15    0.81
  -3   0   5    1.33    0.95
   2   0  -5   10.73    1.04
   2   0  -5   11.71    0.97
  -2   0   5   11.80    1.05
  -2   0   5   11.60    1.08
   1   0  -5  109.86    2.84
  -1   0   5  107.68    2.85
   0   0  -5    0.08    0.60
   0   0   5    0.71    0.61
   0   0   5   -0.50    0.74
  -1   0  -5  112.02    3.13
  -1   0  -5  110.75    2.69
  -1   0  -5  111.01    2.66
   1   0   5  113.48    2.68
   1   0   5  109.62    3.17
   1   0   5  114.42    2.67
  -2   0  -5   14.51    1.24
  -2   0  -5   11.65    0.89
  -2   0  -5   11.95    1.04
   2   0   5   13.10    1.33
  -3   0  -5   -0.03    0.76
   3   0   5    1.06    1.17
  -4   0  -5   50.63    2.18
   4   0   5   51.35    2.70
  -5   0  -5   11.94    1.51
   5   0   5   13.68    1.97
  -6   0  -5    4.66    1.50
   6   0   5    4.69    1.89
  -7   0  -5    4.46    1.65
   7   0   5    9.58    2.32
  -7   1   5    0.87    1.55
  -7   1   5    5.84    1.48
  -6   1   5    1.44    1.23
  -5   1   5    9.78    1.28
   4  -1  -5    2.79    0.82
  -4   1   5    3.41    1.00
  -4   1   5    3.49    1.07
   3  -1  -5   94.18    2.63
  -3   1   5   90.85    2.78
  -3   1   5   91.62    2.71
   2  -1  -5   15.81    1.12
   2  -1  -5   14.62    1.05
  -2   1   5   15.69    1.23
  -2   1   5   15.86    1.18
   1  -1  -5  117.07    3.04
  -1   1   5  119.78    3.05
   0  -1  -5  234.58    5.27
   0   1   5  239.69    5.30
  -1  -1  -5  117.60    2.86
   1   1   5  116.01    2.83
   1   1   5  115.12    2.77
   1   1   5  114.84    3.29
  -2  -1  -5   18.05    1.04
  -2  -1  -5   18.30    1.27
  -2  -1  -5   18.18    1.61
   2   1   5   14.63    1.13
   2   1   5   17.22    1.48
  -3  -1  -5   94.58    2.32
  -3  -1  -5   89.22    2.67
   3   1   5   91.73    3.28
  -4  -1  -5    3.69    0.62
  -4  -1  -5    0.02    0.94
   4   1   5    5.29    1.44
  -5  -1  -5    9.01    1.43
   5   1   5    9.68    1.83
  -6  -1  -5   -0.70    1.30
   6   1   5    1.28    1.74
  -7  -1  -5    3.82    1.55
   7   1   5    6.24    2.12
  -7   2   5    8.91    1.77
  -7   2   5    9.16    1.52
  -6   2   5    6.19    1.29
  -5   2   5   34.38    1.89
   4  -2  -5   26.77    1.46
  -4   2   5   30.22    1.90
  -4   2   5   28.11    1.64
   3  -2  -5   29.16    1.52
  -3   2   5   34.68    1.76
  -3   2   5   29.38    1.59
   2  -2  -5  199.16    4.68
  -2   2   5  197.89    4.73
   1  -2  -5  137.17    3.46
  -1   2   5  143.50    3.54
   0  -2  -5  955.82   20.03
   0   2   5  981.78   20.06
  -1  -2  -5  143.18    3.43
   1   2   5  140.34    3.42
  -2  -2  -5  194.75    4.45
   2   2   5  191.06    4.37
   2   2   5  196.06    4.47
   2   2   5  196.43    4.40
   2   2   5  198.78    5.25
  -3  -2  -5   33.12    1.38
  -3  -2  -5   33.97    1.67
   3   2   5   33.29    1.85
   3   2   5   28.84    2.15
  -4  -2  -5   27.60    1.33
  -4  -2  -5   26.48    1.77
   4   2   5   26.18    2.24
  -5  -2  -5   38.08    2.18
   5   2   5   38.19    2.68
  -6  -2  -5    8.06    1.59
   6   2   5    8.98    2.12
  -7  -2  -5   10.61    1.85
   7   2   5   10.69    2.38
  -7   3   5   -0.15    1.28
  -6   3   5   25.24    1.86
  -5   3   5   57.82    2.29
   4  -3  -5   75.73    2.30
  -4   3   5   77.80    2.50
  -3   3   5   11.57    1.18
  -3   3   5   10.31    1.11
  -2   3   5  198.29    4.78
   1  -3  -5   39.55    1.73
  -1   3   5   35.50    1.72
   0  -3  -5   33.89    1.67
   0   3   5   33.75    1.59
  -1  -3  -5   35.81    1.63
   1   3   5   37.19    1.63
  -2  -3  -5  204.32    4.63
   2   3   5  192.81    4.54
   2   3   5  200.86    4.58
   2   3   5  194.97    5.33
   2   3   5  193.77    4.50
  -3  -3  -5   10.08    0.95
   3   3   5    9.81    1.47
   3   3   5    8.61    0.86
   3   3   5    8.63    0.80
   3   3   5    9.06    1.11
  -4  -3  -5   81.26    2.45
  -4  -3  -5   83.02    2.76
   4   3   5   85.32    3.36
  -5  -3  -5   57.77    2.59
   5   3   5   60.26    3.13
  -6  -3  -5   24.68    2.11
   6   3   5   27.37    2.67
  -7  -3  -5   -0.27    1.44
   7   3   5    3.35    2.01
  -7   4   5   -1.08    1.21
  -6   4   5   -0.03    1.15
  -5   4   5   29.90    1.83
   4  -4  -5   13.26    1.05
  -4   4   5    9.18    1.19
  -3   4   5   50.26    2.06
  -2   4   5   21.33    1.59
  -1   4   5  102.94    2.94
   0  -4  -5   18.53    1.21
   0   4   5   18.40    1.54
  -1  -4  -5  100.10    2.89
   1   4   5  100.79    2.85
  -2  -4  -5   18.42    1.54
   2   4   5   19.02    1.44
   2   4   5   20.58    1.48
  -3  -4  -5   48.26    1.91
   3   4   5   49.88    2.48
   3   4   5   47.25    1.79
   3   4   5   49.50    2.14
  -4  -4  -5   13.75    1.16
   4   4   5   13.01    1.75
   5   4   5   28.61    2.52
   6   4   5    1.51    1.80
   7   4   5    0.74    1.97
  -7   5   5   10.80    1.50
  -6   5   5   17.60    1.59
  -5   5   5    3.29    1.13
  -4   5   5   21.62    1.69
  -3   5   5   83.51    2.72
  -2   5   5   69.78    2.44
  -1   5   5   48.71    2.09
   0   5   5   20.04    1.42
  -1  -5  -5   51.53    2.15
   1   5   5   50.20    2.10
  -2  -5  -5   76.57    2.53
   2   5   5   71.68    2.45
  -3  -5  -5   78.39    2.59
   3   5   5   79.70    2.49
   3   5   5   79.00    3.18
  -4  -5  -5   24.28    1.75
   4   5   5   22.33    1.44
   4   5   5   26.60    2.19
   5   5   5    2.15    1.69
   6   5   5   22.54    2.57
   7   5   5    9.10    2.32
  -7   6   5    5.89    1.40
  -6   6   5    2.54    1.24
  -5   6   5   35.40    2.09
  -4   6   5   13.26    1.40
  -3   6   5    9.25    1.22
  -2   6   5   32.89    1.82
  -1   6   5   24.04    1.74
   0   6   5    4.20    1.11
   1   6   5   27.51    1.83
   2   6   5   29.40    1.81
   3   6   5    8.64    1.20
   4   6   5   12.23    1.30
   4   6   5   11.37    1.82
   5   6   5   37.97    2.82
   6   6   5    2.96    1.97
   7   6   5    4.24    2.17
  -7   7   5   10.05    1.55
  -6   7   5   19.13    1.69
  -5   7   5    3.26    1.28
  -4   7   5    0.87    1.20
  -3   7   5   70.62    2.65
  -2   7   5   43.34    2.11
  -1   7   5    9.19    1.26
   0   7   5    0.44    1.08
   1   7   5   10.13    1.34
   2   7   5   40.64    2.06
   3   7   5   72.90    2.66
   4   7   5    3.34    1.16
   4   7   5    4.31    1.68
   5   7   5    5.58    1.87
   6   7   5   21.57    2.62
   7   7   5    8.88    2.36
  -6   8   5   10.98    1.58
  -5   8   5   25.11    2.07
  -4   8   5   25.51    1.99
  -3   8   5   31.45    2.03
  -2   8   5   57.73    2.44
  -1   8   5   10.14    1.31
   0   8   5    1.88    1.13
   1   8   5   12.64    1.41
   2   8   5   54.53    2.43
   3   8   5   29.41    2.09
   4   8   5   26.49    2.02
   4   8   5   26.06    2.40
   5   8   5   23.14    2.53
   6   8   5    9.26    2.29
  -6   9   5    9.29    1.61
  -5   9   5    7.85    1.54
  -4   9   5   15.45    1.67
  -3   9   5   36.18    2.19
  -2   9   5   33.34    2.10
  -1   9   5    3.61    1.24
   0   9   5    3.96    1.24
   1   9   5    3.52    1.30
   2   9   5   28.64    2.08
   3   9   5   38.95    2.37
   4   9   5   16.83    1.81
   5   9   5    6.29    2.02
   6   9   5    5.86    2.16
  -6  10   5    2.62    1.53
  -5  10   5    2.94    1.51
  -4  10   5   19.20    1.85
  -3  10   5    0.78    1.27
  -2  10   5   20.64    1.81
  -1  10   5    3.68    1.36
   0  10   5    0.46    1.25
   1  10   5    1.75    1.34
   2  10   5   24.91    2.03
   3  10   5    2.02    1.40
   4  10   5   19.82    2.02
   5  10   5    0.99    1.93
   6  10   5    0.01    1.91
  -6  11   5    1.08    1.57
  -5  11   5    9.69    1.77
  -4  11   5    3.68    1.49
  -3  11   5   35.96    2.38
  -2  11   5   42.54    2.52
  -1  11   5   16.13    1.78
   0  11   5   32.84    2.32
   1  11   5   15.10    1.84
   2  11   5   41.40    2.56
   3  11   5   40.33    2.70
   4  11   5   -0.06    1.50
   5  11   5   12.14    2.40
   6  11   5    3.25    2.16
  -5  12   5    2.73    1.62
  -4  12   5    9.40    1.75
  -3  12   5    4.92    1.53
  -2  12   5    6.56    1.55
   0  12   5   -1.49    1.41
   1  12   5   47.73    2.79
   2  12   5    4.22    1.74
   3  12   5    3.90    1.69
   4  12   5   12.22    2.12
   5  12   5   -0.32    1.99
  -5  13   5    3.67    1.71
  -4  13   5    2.69    1.61
  -3  13   5   -0.68    1.45
  -2  13   5    6.36    1.68
  -1  13   5   12.22    1.91
   1  13   5   11.67    1.99
   2  13   5    9.99    1.99
   3  13   5   -0.03    1.63
   4  13   5    2.56    1.76
   5  13   5    1.41    2.20
  -4  14   5    1.75    1.66
  -3  14   5    6.03    1.78
  -2  14   5    0.79    1.56
  -1  14   5   13.68    2.04
   0  14   5    7.85    1.94
   1  14   5   14.66    2.12
   2  14   5    2.05    1.89
   3  14   5   11.17    2.27
  -3  15   5    3.20    1.69
  -2  15   5    9.83    1.95
  -1  15   5    5.57    1.83
   0  15   5   -0.79    1.70
   1  15   5    4.99    2.10
   2  15   5    7.32    2.19
   3  15   5    0.09    1.84
  -3  16   5    4.85    1.84
  -2  16   5    7.74    1.93
  -1  16   5    2.43    1.84
   0  16   5   17.83    2.41
   1  16   5   -0.73    2.00
   2  16   5   14.80    2.47
   3  16   5    4.34    2.14
  -1  17   5    2.61    1.92
   0  17   5    1.00    1.97
   1  17   5   -1.30    2.14
   1  17  -6    5.06    2.17
   0  17  -6   17.39    2.49
  -1  17  -6    6.31    1.97
   2  16  -6    3.00    2.07
   1  16  -6    1.22    1.98
   0  16  -6   24.59    2.55
  -1  16  -6    1.25    1.71
  -2  16  -6    0.54    1.59
   3  15  -6    4.20    2.08
   2  15  -6    4.31    2.01
   1  15  -6    8.75    2.07
   0  15  -6    5.91    1.89
  -1  15  -6    4.97    1.75
  -2  15  -6    2.02    1.60
  -3  15  -6    2.81    1.62
   4  14  -6    0.50    2.01
   3  14  -6    4.38    2.09
   2  14  -6    7.31    1.97
   1  14  -6    0.97    1.68
   0  14  -6   15.91    2.09
  -1  14  -6   -0.39    1.48
  -2  14  -6    3.68    1.58
  -3  14  -6    9.49    1.77
  -4  14  -6    0.92    1.48
  -5 -13   6    7.82    2.04
   4  13  -6   -0.56    1.90
  -4 -13   6    4.53    1.87
   3  13  -6   11.19    2.16
  -3 -13   6   14.70    2.18
   2  13  -6   16.08    2.19
   1  13  -6   13.22    2.06
   0  13  -6    2.22    1.57
  -1  13  -6   12.93    1.90
  -2  13  -6   17.44    1.95
  -3  13  -6   10.36    1.71
  -4  13  -6    5.41    1.54
  -5  13  -6    7.46    1.63
  -5 -12   6    3.15    1.84
   4  12  -6    2.56    1.87
  -4 -12   6    1.45    1.72
   3  12  -6    3.76    1.81
  -3 -12   6    5.79    1.77
   2  12  -6   11.56    1.96
  -2 -12   6   12.88    1.95
   1  12  -6   47.74    2.84
   0  12  -6   23.21    2.12
  -1  12  -6   41.34    2.60
  -2  12  -6   10.11    1.66
  -3  12  -6    3.89    1.40
  -4  12  -6    0.02    1.24
  -5  12  -6    1.19    1.36
  -5 -11   6   27.30    2.52
   4  11  -6   -0.36    1.72
  -4 -11   6    0.96    1.56
   3  11  -6   48.12    2.88
  -3 -11   6   49.68    2.81
   2  11  -6    8.74    1.81
  -2 -11   6   11.18    1.77
   1  11  -6    4.68    1.61
  -1 -11   6    5.75    1.59
   0  11  -6   47.34    2.67
  -1  11  -6    3.79    1.42
  -2  11  -6   12.01    1.62
  -3  11  -6   53.71    2.65
  -4  11  -6    1.18    1.23
  -5  11  -6   35.77    2.28
  -6 -10   6    5.70    1.97
   5  10  -6    2.34    1.63
   5  10  -6    0.68    1.56
  -5 -10   6    2.23    1.74
   4  10  -6    3.38    1.73
  -4 -10   6    3.68    1.69
   3  10  -6    2.40    1.59
  -3 -10   6    1.62    1.48
   2  10  -6   42.00    2.59
  -2 -10   6   38.27    2.46
   1  10  -6   12.55    1.69
  -1 -10   6   13.09    1.73
   0  10  -6   -0.14    1.24
   0 -10   6    1.50    1.21
  -1  10  -6   11.13    1.56
  -2  10  -6   43.30    2.39
  -3  10  -6    1.43    1.18
  -4  10  -6    4.00    1.24
  -5  10  -6    0.25    1.12
  -6  -9   6    6.66    1.94
   5   9  -6   13.27    1.96
   5   9  -6   15.44    1.82
  -5  -9   6   10.52    1.91
   4   9  -6   26.39    2.21
  -4  -9   6   20.21    2.07
   3   9  -6    0.74    1.47
   3   9  -6    1.54    0.77
  -3  -9   6    1.62    1.48
   2   9  -6    6.03    1.48
  -2  -9   6    4.44    1.38
   1   9  -6   37.59    2.25
  -1  -9   6   35.33    2.23
   0   9  -6   13.00    1.56
   0  -9   6   18.88    1.66
  -1   9  -6   38.48    2.23
  -2   9  -6    7.18    1.28
  -3   9  -6    2.72    1.12
  -4   9  -6   23.48    1.84
  -5   9  -6   14.64    1.41
  -6  -8   6   14.99    2.15
   5   8  -6   10.68    1.77
   5   8  -6   10.06    1.59
  -5  -8   6   12.20    1.88
   4   8  -6    4.10    1.34
   4   8  -6    5.06    1.56
  -4  -8   6    5.72    1.59
   3   8  -6    8.95    1.59
   3   8  -6    8.13    0.88
  -3  -8   6    8.26    1.55
   2   8  -6   64.39    2.76
  -2  -8   6   61.00    2.69
   1   8  -6   37.07    2.18
  -1  -8   6   44.97    2.23
   0   8  -6   13.93    1.47
   0  -8   6   16.20    1.49
  -1   8  -6   45.73    2.20
  -2   8  -6   64.77    2.50
  -3   8  -6    8.36    1.08
  -3   8  -6    9.76    1.23
  -4   8  -6    3.87    1.06
  -5   8  -6   11.77    1.22
  -7  -7   6    0.05    1.85
  -6  -7   6   12.47    2.00
   5   7  -6    2.45    1.37
   5   7  -6    0.66    1.39
  -5  -7   6    2.85    1.59
   4   7  -6   38.12    2.34
   4   7  -6   33.28    2.12
  -4  -7   6   34.13    2.37
   3   7  -6    3.61    1.36
  -3  -7   6    5.28    1.37
   2   7  -6   34.64    1.25
   2   7  -6   31.08    2.07
  -2  -7   6   36.58    2.09
   1   7  -6   13.49    1.45
  -1  -7   6   13.10    1.45
   0   7  -6    4.57    1.16
   0  -7   6    4.89    1.13
  -1   7  -6   12.24    1.31
   1  -7   6   11.72    1.21
  -2   7  -6   37.61    1.92
  -2   7  -6   34.75    1.81
  -3   7  -6    6.58    0.92
  -3   7  -6    6.71    1.05
  -4   7  -6   35.61    1.76
  -5   7  -6    2.59    0.90
  -7  -6   6   18.40    2.24
   6   6  -6    7.39    1.71
  -6  -6   6    4.73    1.71
   5   6  -6   14.85    1.68
   5   6  -6   14.42    1.59
  -5  -6   6   15.15    1.90
   4   6  -6   -0.37    1.19
   4   6  -6   -0.83    1.07
  -4  -6   6    1.05    1.34
   3   6  -6   29.96    1.98
  -3  -6   6   32.13    2.06
   2   6  -6  141.90    4.06
   2   6  -6  143.48    3.09
  -2  -6   6  148.87    4.10
   1   6  -6   13.91    1.42
  -1  -6   6   16.48    1.48
   0   6  -6    1.73    1.06
   0  -6   6    2.86    1.12
  -1   6  -6   15.01    1.23
  -1   6  -6   16.88    1.36
   1  -6   6   18.95    1.32
  -2   6  -6  147.62    3.80
  -2   6  -6  148.01    3.83
  -3   6  -6   33.12    1.61
  -3   6  -6   32.88    1.64
  -4   6  -6   -0.07    0.69
  -4   6  -6    0.59    0.79
  -7  -5   6   -0.18    1.67
   6   5  -6    3.13    1.51
  -6  -5   6    4.44    1.62
   5   5  -6    4.85    1.27
   5   5  -6    8.52    1.46
  -5  -5   6    5.61    1.57
   4   5  -6   32.64    1.92
   4   5  -6   31.47    2.07
  -4  -5   6   32.00    2.18
   3   5  -6   61.53    2.26
   3   5  -6   65.48    2.51
  -3  -5   6   60.27    2.51
   2   5  -6  112.87    3.38
  -2  -5   6  112.37    3.41
   1   5  -6   51.91    2.27
  -1  -5   6   52.41    2.21
   0   5  -6   83.78    2.71
   0  -5   6   81.36    2.65
  -1   5  -6   48.11    2.06
  -1   5  -6   52.59    2.05
   1  -5   6   52.79    2.00
  -2   5  -6  114.95    3.00
  -2   5  -6  108.60    3.01
  -3   5  -6   63.37    2.03
  -3   5  -6   63.93    2.01
  -4   5  -6   32.07    1.42
  -6   5  -6    1.12    1.19
  -7  -4   6    3.72    1.73
   6   4  -6    7.82    1.65
  -6  -4   6    6.55    1.35
  -6  -4   6    9.62    1.72
   5   4  -6   21.38    1.90
   5   4  -6   18.69    1.56
  -5  -4   6   20.61    1.50
  -5  -4   6   19.01    1.84
   4   4  -6    0.97    1.05
   4   4  -6    1.76    1.00
  -4  -4   6   -0.99    1.17
  -4  -4   6    1.57    0.83
   3   4  -6   18.92    1.38
   3   4  -6   18.62    1.46
  -3  -4   6   16.95    1.48
   2   4  -6  115.48    3.36
  -2  -4   6  116.98    3.42
   1   4  -6   80.05    2.73
  -1  -4   6   82.64    2.70
   0   4  -6  159.18    4.01
   0   4  -6  157.03    4.03
   0  -4   6  158.42    3.99
  -1   4  -6   86.95    2.48
  -1   4  -6   80.49    2.50
   1  -4   6   80.78    2.44
   1  -4   6   80.78    2.42
  -2   4  -6  121.45    3.09
  -2   4  -6  120.30    3.12
  -2   4  -6  124.25    3.90
  -3   4  -6   16.90    1.11
  -3   4  -6   16.51    1.09
  -6   4  -6    6.32    1.44
  -7  -3   6    1.20    1.35
  -7  -3   6    0.25    1.59
   6   3  -6    1.34    1.43
  -6  -3   6    1.28    1.48
  -6  -3   6    0.61    1.19
   5   3  -6   91.91    2.96
   5   3  -6   91.22    3.29
  -5  -3   6   94.69    2.91
  -5  -3   6   94.80    3.30
   4   3  -6  111.33    3.36
   4   3  -6  108.55    3.31
  -4  -3   6  116.77    3.02
  -4  -3   6  119.42    3.53
   3   3  -6   39.20    1.66
   3   3  -6   40.77    1.92
  -3  -3   6   38.90    2.05
  -3  -3   6   40.53    1.45
   2   3  -6   10.97    1.23
  -2  -3   6   12.52    1.34
   1   3  -6   40.07    1.88
   1   3  -6   36.58    1.83
  -1  -3   6   39.67    1.83
  -1  -3   6   37.04    1.86
   0   3  -6   16.66    1.13
   0   3  -6   15.53    1.23
   0  -3   6   17.38    1.17
   0  -3   6   18.61    1.27
  -1   3  -6   38.69    1.72
  -1   3  -6   40.38    1.60
  -1   3  -6   39.91    1.96
   1  -3   6   37.02    1.57
   1  -3   6   37.91    1.64
  -2   3  -6   14.00    1.13
  -2   3  -6   15.01    1.00
  -2   3  -6   14.65    1.37
  -3   3  -6   40.05    1.33
  -5   3  -6   98.43    3.43
  -6   3  -6    0.66    1.17
  -7  -2   6    1.20    1.54
  -7  -2   6    0.43    1.35
  -6  -2   6   36.29    2.37
  -6  -2   6   33.44    2.17
   5   2  -6   16.26    1.54
   5   2  -6   11.94    1.27
  -5  -2   6   14.89    1.43
  -5  -2   6   14.14    1.59
   4   2  -6   14.68    1.28
   4   2  -6   17.87    1.32
  -4  -2   6   15.76    1.26
  -4  -2   6   15.56    1.49
   3   2  -6   94.38    2.87
   3   2  -6   92.06    2.69
  -3  -2   6   94.00    2.49
  -3  -2   6  102.95    2.98
  -3  -2   6   91.90    2.93
   2   2  -6   70.75    2.42
  -2  -2   6   70.10    2.46
  -2  -2   6   70.59    2.45
   1   2  -6   48.00    1.87
   1   2  -6   52.90    1.97
  -1  -2   6   49.42    2.01
  -1  -2   6   49.53    2.01
   0   2  -6   15.08    0.89
   0   2  -6   16.28    1.13
   0   2  -6   12.51    0.78
   0   2  -6   14.67    1.01
   0  -2   6   14.97    1.14
   0  -2   6   14.05    1.09
  -1   2  -6   49.03    1.67
  -1   2  -6   51.87    1.78
  -1   2  -6   50.08    1.70
  -1   2  -6   49.29    2.08
   1  -2   6   49.86    1.69
   1  -2   6   48.09    2.14
  -2   2  -6   67.51    2.68
  -2   2  -6   67.49    1.90
  -2   2  -6   69.42    2.28
  -2   2  -6   65.35    1.91
   2  -2   6   71.52    2.82
  -3   2  -6   97.34    2.89
   3  -2   6   86.75    3.33
  -4   2  -6   15.02    1.42
   4  -2   6   20.85    1.99
  -5   2  -6   16.47    1.64
   5  -2   6   21.66    2.34
  -6   2  -6   34.62    2.34
  -7   2  -6   -1.00    1.46
  -7  -1   6    4.60    1.58
  -7  -1   6    1.98    1.38
  -6  -1   6    1.42    1.30
  -6  -1   6    4.19    1.44
   5   1  -6   83.35    2.53
  -5  -1   6   80.24    2.92
  -5  -1   6   77.39    2.82
   4   1  -6    4.66    1.00
  -4  -1   6    5.76    1.16
   3   1  -6   69.54    2.33
  -3  -1   6   71.06    2.47
   2   1  -6    4.06    1.02
  -2  -1   6    4.10    1.06
   1   1  -6   44.66    1.80
   1   1  -6   44.49    1.78
  -1  -1   6   42.83    1.76
   0   1  -6  162.08    3.92
   0   1  -6  164.89    3.89
   0   1  -6  159.66    3.94
   0  -1   6  165.37    3.98
   0  -1   6  165.34    3.35
   0  -1   6  163.22    3.90
  -1   1  -6   47.06    1.61
  -1   1  -6   44.80    1.60
  -1   1  -6   48.79    1.96
   1  -1   6   46.77    2.01
   1  -1   6   48.45    1.62
  -2   1  -6    5.37    0.61
  -2   1  -6    5.96    0.92
  -2   1  -6    5.37    1.02
   2  -1   6    5.04    1.24
  -3   1  -6   70.01    2.38
   3  -1   6   70.59    2.89
  -4   1  -6    7.02    1.08
   4  -1   6    5.48    1.50
  -5   1  -6   77.44    2.94
   5  -1   6   76.42    3.56
  -6   1  -6    2.60    1.40
   6  -1   6    0.74    1.79
  -7   1  -6    1.92    1.56
  -7   0   6   19.60    1.98
  -7   0   6   19.15    1.89
  -6   0   6   43.72    2.40
  -6   0   6   44.49    2.46
   5   0  -6    2.56    0.87
  -5   0   6    3.88    1.25
   4   0  -6   11.65    1.11
  -4   0   6    9.73    1.20
  -4   0   6   10.59    1.24
   3   0  -6    1.97    0.91
  -3   0   6    3.05    0.74
  -3   0   6    3.64    1.03
   2   0  -6   59.44    2.12
  -2   0   6   62.00    2.16
   1   0  -6   65.38    2.13
  -1   0   6   65.62    2.13
   0   0  -6   90.18    2.45
   0   0   6   85.90    2.41
   0   0   6   89.57    2.48
  -1   0  -6   66.08    2.29
  -1   0  -6   66.27    1.89
  -1   0  -6   62.84    1.93
   1   0   6   65.67    1.94
   1   0   6   65.76    1.93
   1   0   6   65.05    2.35
  -2   0  -6   61.19    2.06
  -2   0  -6   58.58    2.46
  -2   0  -6   60.92    1.76
   2   0   6   61.42    2.53
  -3   0  -6    2.57    0.51
  -3   0  -6    1.84    0.83
   3   0   6    2.07    1.23
  -4   0  -6    9.24    1.17
   4   0   6   10.45    1.67
  -5   0  -6    5.41    1.27
   5   0   6    2.94    1.67
  -6   0  -6   40.40    2.51
   6   0   6   43.71    3.15
  -7   0  -6   20.04    2.15
   7   0   6   22.88    2.78
  -7   1   6    1.62    1.43
  -7   1   6    0.67    1.53
  -6   1   6    2.56    1.34
   5  -1  -6   77.48    2.38
  -5   1   6   81.98    2.79
   4  -1  -6    6.68    0.98
  -4   1   6    4.91    1.09
  -4   1   6    5.98    1.09
   3  -1  -6   70.38    2.28
  -3   1   6   71.88    2.40
  -3   1   6   67.59    2.29
  -2   1   6    3.45    1.00
   1  -1  -6   44.63    1.82
  -1   1   6   45.61    1.81
   0  -1  -6  160.46    3.86
   0   1   6  160.94    3.88
  -1  -1  -6   47.29    1.69
   1   1   6   45.31    2.03
   1   1   6   45.59    1.66
   1   1   6   46.19    1.63
  -2  -1  -6    4.06    0.84
  -2  -1  -6    5.47    0.95
  -2  -1  -6    5.15    0.69
   2   1   6    3.87    1.22
   2   1   6    3.37    0.92
  -3  -1  -6   69.66    2.27
  -3  -1  -6   69.03    1.95
   3   1   6   73.13    2.90
  -4  -1  -6    6.26    1.07
  -4  -1  -6    4.90    0.67
   4   1   6    8.68    1.56
  -5  -1  -6   80.13    3.00
   5   1   6   79.68    3.61
  -6  -1  -6    0.06    1.38
   6   1   6    3.58    1.88
  -7  -1  -6    1.88    1.58
   7   1   6    3.01    2.04
  -7   2   6    3.50    1.48
  -6   2   6   35.72    2.13
  -5   2   6   12.74    1.40
   4  -2  -6   18.00    1.22
  -4   2   6   11.67    1.28
  -4   2   6   18.03    1.41
   3  -2  -6   88.87    2.59
  -3   2   6   88.25    2.77
  -3   2   6   88.09    2.70
  -2   2   6   68.39    2.34
   1  -2  -6   45.62    1.87
  -1   2   6   46.14    1.90
   0  -2  -6   12.64    0.99
   0   2   6   14.07    1.12
  -1  -2  -6   49.45    1.75
   1   2   6   48.28    1.79
  -2  -2  -6   68.89    2.09
   2   2   6   67.78    2.04
   2   2   6   65.04    2.69
   2   2   6   67.05    2.31
  -3  -2  -6   91.41    2.49
  -3  -2  -6   89.78    2.68
   3   2   6   94.42    3.38
   3   2   6   96.23    2.88
  -4  -2  -6   14.77    1.18
  -4  -2  -6   14.78    1.38
   4   2   6   17.02    1.81
  -5  -2  -6   14.42    1.58
   5   2   6   17.71    2.13
  -6  -2  -6   37.70    2.47
   6   2   6   34.19    2.95
  -7  -2  -6    0.45    1.54
   7   2   6    0.90    2.04
  -7   3   6    1.95    1.40
  -6   3   6    1.23    1.21
  -5   3   6   88.23    2.93
   4  -3  -6  114.50    3.14
  -4   3   6  116.74    3.34
  -3   3   6   42.26    1.89
  -2   3   6   10.98    1.20
  -1   3   6   38.31    1.77
   0  -3  -6   15.59    1.10
   0   3   6   13.49    1.21
  -1  -3  -6   40.05    1.78
   1   3   6   38.88    1.79
  -2  -3  -6   12.43    1.03
   2   3   6   12.04    1.43
   2   3   6   12.24    1.12
   2   3   6   10.71    1.09
  -3  -3  -6   39.67    1.67
   3   3   6   41.02    2.35
   3   3   6   38.95    1.94
   3   3   6   38.44    1.50
  -4  -3  -6  111.86    3.31
  -4  -3  -6  110.75    3.00
   4   3   6  110.34    3.98
  -5  -3  -6   97.20    3.33
   5   3   6   98.11    3.97
  -6  -3  -6    3.76    1.45
   6   3   6    3.83    1.97
  -7  -3  -6    5.00    1.65
   7   3   6    1.74    2.04
  -7   4   6    4.42    1.38
  -6   4   6    6.18    1.35
  -5   4   6   18.23    1.53
   4  -4  -6    1.52    0.85
  -4   4   6    0.47    1.00
  -3   4   6   17.06    1.37
  -2   4   6  116.88    3.31
  -1   4   6   81.20    2.63
   0  -4  -6  155.74    3.95
   0   4   6  152.49    3.98
  -1  -4  -6   75.74    2.50
   1   4   6   75.60    2.46
  -2  -4  -6  116.01    3.21
   2   4   6  114.48    3.17
   2   4   6  118.69    3.17
  -3  -4  -6   15.74    1.19
   3   4   6   14.41    1.13
   3   4   6   16.57    1.70
  -4  -4  -6    1.66    0.92
   4   4   6    1.58    1.43
   5   4   6   17.28    2.21
   6   4   6    7.51    2.05
   7   4   6   -0.07    1.98
  -7   5   6    2.54    1.35
  -6   5   6    2.65    1.25
  -5   5   6    7.83    1.32
  -4   5   6   32.04    1.89
  -3   5   6   61.45    2.37
  -2   5   6  107.79    3.20
  -1   5   6   46.53    2.11
   0   5   6   83.93    2.73
   1   5   6   47.96    2.07
  -2  -5  -6  118.17    3.23
   2   5   6  108.90    3.19
  -3  -5  -6   64.72    2.34
   3   5   6   60.02    2.84
   3   5   6   59.85    2.17
  -4  -5  -6   31.26    1.82
   4   5   6   31.99    2.43
   4   5   6   26.85    1.53
   5   5   6    6.65    1.90
   6   5   6    2.58    1.91
   7   5   6   -1.74    1.97
  -7   6   6   10.45    1.56
  -6   6   6    9.21    1.47
  -5   6   6   11.78    1.49
  -4   6   6    1.63    1.15
  -3   6   6   32.23    1.93
  -2   6   6  137.57    3.85
  -1   6   6   12.67    1.34
   0   6   6    0.98    1.08
   1   6   6   15.02    1.42
   2   6   6  144.07    3.92
   3   6   6   32.36    1.83
   4   6   6    2.98    1.54
   4   6   6    0.29    0.94
   5   6   6   14.98    2.19
   6   6   6    5.52    2.05
   7   6   6   15.09    2.56
  -7   7   6    2.48    1.37
  -6   7   6    9.16    1.49
  -5   7   6    3.70    1.33
  -4   7   6   35.29    2.16
  -3   7   6    5.50    1.24
  -2   7   6   33.42    1.93
  -1   7   6    9.49    1.29
   0   7   6    2.00    1.11
   1   7   6   10.76    1.36
   2   7   6   33.19    1.94
   3   7   6    3.36    1.15
   4   7   6   30.81    2.66
   4   7   6   30.88    1.93
   5   7   6    2.02    1.79
   6   7   6   11.89    2.33
   7   7   6    3.87    2.10
  -6   8   6   14.70    1.70
  -5   8   6    8.32    1.53
  -4   8   6    3.53    1.39
  -3   8   6    6.96    1.35
  -2   8   6   57.75    2.50
  -1   8   6   39.53    2.12
   0   8   6   12.40    1.45
   1   8   6   41.62    2.17
   2   8   6   54.72    2.48
   3   8   6   10.97    1.52
   4   8   6    4.09    1.76
   4   8   6    4.68    1.37
   5   8   6   11.61    2.19
   6   8   6    8.97    2.31
  -6   9   6    4.12    1.53
  -5   9   6   11.08    1.67
  -4   9   6   21.27    1.89
  -3   9   6    2.84    1.35
  -2   9   6    3.49    1.28
  -1   9   6   32.47    2.10
   0   9   6   12.60    1.55
   1   9   6   38.54    2.27
   2   9   6    5.12    1.47
   3   9   6    0.21    1.27
   4   9   6   24.13    1.96
   4   9   6   20.65    2.40
   5   9   6   10.36    2.19
   6   9   6    5.89    2.18
  -6  10   6    5.76    1.64
  -5  10   6    3.13    1.53
  -4  10   6    2.96    1.44
  -3  10   6    0.47    1.30
  -2  10   6   32.61    2.24
  -1  10   6   10.71    1.54
   0  10   6   -1.70    1.25
   1  10   6   10.88    1.69
   2  10   6   40.28    2.48
   3  10   6    1.30    1.37
   4  10   6    2.66    1.48
   5  10   6    3.15    2.00
   6  10   6    5.92    2.31
  -5  11   6   32.72    2.57
  -4  11   6    2.25    1.50
  -3  11   6   46.95    2.66
  -2  11   6    7.25    1.54
  -1  11   6    3.34    1.41
   0  11   6   40.85    2.53
   1  11   6    4.90    1.61
   2  11   6    9.73    1.84
   3  11   6   46.47    2.81
   4  11   6    1.90    1.56
   5  11   6   25.21    2.89
  -5  12   6    1.39    1.61
  -4  12   6    0.46    1.51
  -3  12   6    2.92    1.55
  -2  12   6    8.57    1.69
  -1  12   6   40.26    2.61
   0  12   6   19.57    2.05
   1  12   6   43.71    2.77
   2  12   6   16.00    2.08
   3  12   6    1.27    1.58
   4  12   6    0.66    1.61
   5  12   6   -3.47    1.85
  -5  13   6    9.79    1.98
  -4  13   6    2.90    1.61
  -3  13   6    8.96    1.77
  -2  13   6    8.73    1.75
  -1  13   6   11.67    1.87
   0  13   6    2.47    1.71
   1  13   6   11.91    2.05
   2  13   6   14.85    2.20
   3  13   6   16.11    2.31
   5  13   6    6.58    2.36
  -4  14   6   -0.43    1.60
  -3  14   6    8.02    1.85
  -2  14   6    8.33    1.80
  -1  14   6   -1.96    1.53
   0  14   6   11.71    2.09
   1  14   6    1.10    1.84
   2  14   6    7.44    2.07
   3  14   6   10.64    2.23
  -3  15   6    3.01    1.69
  -2  15   6    1.24    1.60
  -1  15   6    8.21    1.87
   0  15   6    3.77    1.88
   1  15   6    5.95    2.05
   2  15   6    2.53    2.10
   3  15   6    5.91    2.00
  -2  16   6    2.70    1.77
  -1  16   6    1.49    1.84
   0  16   6   14.63    2.32
   1  16   6    1.46    2.10
   2  16   6   -0.10    2.04
  -1  17   6    7.65    2.02
   0  17   6   17.81    2.56
   1  17   6    7.06    2.31
   0  17  -7   -0.54    1.78
   2  16  -7   -2.65    1.91
   1  16  -7    7.40    2.10
   0  16  -7   12.32    2.20
  -1  16  -7    7.21    1.94
  -2  16  -7    1.78    1.75
   3  15  -7    6.56    2.21
   2  15  -7    3.38    1.98
   1  15  -7    2.87    1.90
   0  15  -7    4.10    1.87
  -1  15  -7    7.02    1.85
  -2  15  -7    6.12    1.74
  -3  15  -7    1.23    1.61
   4  14  -7    3.74    2.09
  -4 -14   7    5.47    1.98
   3  14  -7    6.54    2.11
   2  14  -7    5.16    1.95
   1  14  -7    1.84    1.77
   0  14  -7   10.57    1.96
  -1  14  -7    2.18    1.58
  -2  14  -7    4.96    1.66
  -3  14  -7    6.79    1.67
  -4  14  -7    1.10    1.49
  -5 -13   7    1.00    1.89
   4  13  -7    5.97    2.10
  -4 -13   7    5.44    1.90
   3  13  -7    3.89    1.95
  -3 -13   7    4.62    1.83
   2  13  -7    6.00    1.93
  -2 -13   7    5.09    1.83
   1  13  -7    2.17    1.64
   0  13  -7   -0.86    1.47
  -1  13  -7    3.77    1.59
  -2  13  -7    8.34    1.67
  -3  13  -7    3.43    1.47
  -4  13  -7    5.30    1.51
  -5 -12   7   -3.60    1.63
   4  12  -7   -0.54    1.83
  -4 -12   7    6.20    1.88
   3  12  -7   -0.52    1.72
  -3 -12   7   -1.51    1.58
   2  12  -7    8.98    1.90
  -2 -12   7   10.04    1.85
   1  12  -7   53.04    2.90
  -1 -12   7   48.51    2.74
   0  12  -7    2.92    1.54
  -1  12  -7   49.85    2.79
  -2  12  -7   10.02    1.64
  -3  12  -7   -0.07    1.30
  -4  12  -7    1.87    1.32
  -5  12  -7   -0.18    1.28
  -5 -11   7    4.45    1.82
   4  11  -7    0.50    1.72
  -4 -11   7    0.27    1.66
   3  11  -7    2.98    1.73
  -3 -11   7    0.25    1.56
   2  11  -7   38.15    2.66
  -2 -11   7   42.47    2.64
   1  11  -7    3.51    1.57
  -1 -11   7    2.69    1.52
   0  11  -7    0.22    1.32
  -1  11  -7    2.41    1.40
  -2  11  -7   41.96    2.49
  -3  11  -7   -0.17    1.21
  -4  11  -7    0.55    1.22
  -5  11  -7    4.87    1.36
  -6 -10   7   10.02    2.15
   5  10  -7    3.22    1.66
  -5 -10   7    2.72    1.73
   4  10  -7    9.28    1.89
  -4 -10   7    5.58    1.73
   3  10  -7    1.12    1.58
  -3 -10   7   -0.65    1.42
   2  10  -7    7.22    1.67
  -2 -10   7    5.32    1.60
   1  10  -7   21.85    2.01
  -1 -10   7   22.00    1.99
   0  10  -7    0.06    1.25
   0 -10   7   -0.31    1.25
  -1  10  -7   21.78    1.91
  -2  10  -7    6.49    1.39
  -3  10  -7    0.97    1.15
  -4  10  -7    8.98    1.38
  -5  10  -7    1.15    1.19
  -6  -9   7   -0.26    1.75
   5   9  -7    4.94    1.67
   5   9  -7    5.30    1.62
  -5  -9   7    4.91    1.79
   4   9  -7    7.47    1.74
  -4  -9   7    4.33    1.63
   3   9  -7   19.83    2.01
   3   9  -7   18.52    1.26
  -3  -9   7   20.06    1.96
   2   9  -7   25.59    2.07
  -2  -9   7   25.77    2.16
   1   9  -7   65.51    2.83
  -1  -9   7   63.86    2.77
   0   9  -7   19.04    1.73
   0  -9   7   22.23    1.79
  -1   9  -7   68.21    2.78
  -2   9  -7   24.79    1.98
  -3   9  -7   18.39    1.56
  -4   9  -7    5.14    1.19
  -5   9  -7    8.21    1.24
  -6  -8   7    6.11    1.90
   5   8  -7    0.80    1.37
   5   8  -7    1.12    1.46
  -5  -8   7    1.55    1.61
   4   8  -7   22.63    1.75
   4   8  -7   25.13    2.11
  -4  -8   7   22.41    2.09
   3   8  -7   14.59    1.76
  -3  -8   7   12.27    1.70
   2   8  -7    6.52    0.68
   2   8  -7    9.13    1.53
  -2  -8   7   11.21    1.56
   1   8  -7   22.15    1.79
  -1  -8   7   24.67    1.85
   0   8  -7  221.62    5.68
   0  -8   7  219.50    5.61
  -1   8  -7   24.77    1.84
   1  -8   7   25.37    1.78
  -2   8  -7    9.73    1.30
  -3   8  -7   18.44    1.38
  -3   8  -7   16.97    1.44
  -4   8  -7   21.48    1.69
  -5   8  -7    0.30    0.94
  -7  -7   7    1.70    1.91
  -6  -7   7    2.54    1.76
   5   7  -7    6.36    1.48
   5   7  -7    3.53    1.44
  -5  -7   7    1.65    1.60
   4   7  -7   -1.28    1.29
   4   7  -7   -0.52    1.12
  -4  -7   7   -0.32    1.43
   3   7  -7   16.67    1.69
  -3  -7   7   16.47    1.73
   2   7  -7   53.97    2.45
  -2  -7   7   49.46    2.44
   1   7  -7   60.29    2.51
  -1  -7   7   54.77    2.37
   0   7  -7   14.09    1.42
   0  -7   7   15.41    1.48
  -1   7  -7   60.78    2.38
   1  -7   7   55.72    2.23
  -2   7  -7   48.68    2.13
  -2   7  -7   48.09    2.10
  -3   7  -7   18.64    1.55
  -3   7  -7   19.69    1.58
  -4   7  -7   -1.39    0.85
  -5   7  -7    3.12    0.91
  -7  -6   7    2.40    1.82
  -6  -6   7   11.44    1.95
   5   6  -7   12.20    1.68
   5   6  -7   15.05    1.56
  -5  -6   7   10.95    1.80
   4   6  -7   15.16    1.38
   4   6  -7   14.25    1.67
  -4  -6   7   12.50    1.70
   3   6  -7   57.79    2.57
  -3  -6   7   59.90    2.61
   2   6  -7   58.44    2.49
  -2  -6   7   57.40    2.49
   1   6  -7   46.79    2.18
  -1  -6   7   48.94    2.26
   0   6  -7  114.11    3.42
   0  -6   7  120.81    3.43
  -1   6  -7   50.39    2.11
   1  -6   7   51.17    2.05
  -2   6  -7   62.76    2.22
  -2   6  -7   60.63    2.25
  -3   6  -7   62.32    2.16
  -3   6  -7   58.52    2.11
  -4   6  -7   15.10    1.15
  -6   6  -7   14.08    1.92
  -7  -5   7    8.19    1.91
  -6  -5   7    4.87    1.71
   5   5  -7   13.89    1.47
   5   5  -7   11.50    1.56
  -5  -5   7    7.30    1.69
   4   5  -7    3.64    1.08
   4   5  -7    3.44    1.29
  -4  -5   7    0.70    1.31
   3   5  -7   72.55    2.39
   3   5  -7   74.87    2.76
  -3  -5   7   75.13    2.86
   2   5  -7   20.53    1.56
  -2  -5   7   19.60    1.59
   1   5  -7   79.59    2.71
  -1  -5   7   80.24    2.76
   0   5  -7    5.05    1.12
   0  -5   7    5.19    1.17
  -1   5  -7   80.95    2.62
  -1   5  -7   80.21    2.58
   1  -5   7   79.59    2.50
  -2   5  -7   19.53    1.42
  -2   5  -7   17.97    1.38
  -3   5  -7   75.14    2.23
  -3   5  -7   72.27    2.26
  -4   5  -7    3.21    0.77
  -4   5  -7    3.32    0.70
  -6   5  -7    4.62    1.54
  -7  -4   7    1.85    1.73
  -6  -4   7    6.21    1.71
  -6  -4   7    6.42    1.29
   5   4  -7   10.08    1.44
   5   4  -7   10.53    1.34
  -5  -4   7    6.87    1.59
  -5  -4   7    6.32    1.14
   4   4  -7    2.59    0.99
   4   4  -7    2.91    1.19
  -4  -4   7    1.50    0.81
  -4  -4   7    4.08    1.36
   3   4  -7   16.30    1.07
   3   4  -7   13.73    1.40
  -3  -4   7   12.03    1.44
   2   4  -7   47.73    2.15
  -2  -4   7   45.09    2.19
   1   4  -7  281.26    6.59
  -1  -4   7  278.09    6.55
   0   4  -7  145.67    3.67
   0   4  -7  110.48    3.51
   0  -4   7  145.06    3.63
  -1   4  -7  271.85    6.16
  -1   4  -7  268.63    6.75
  -1   4  -7  264.32    6.16
   1  -4   7  274.71    6.11
  -2   4  -7   48.07    1.81
  -2   4  -7   48.35    1.79
   2  -4   7   47.14    1.61
  -3   4  -7   13.81    0.91
  -3   4  -7   13.42    1.12
  -5   4  -7    8.68    1.53
  -6   4  -7    8.22    1.52
  -7  -3   7    8.94    1.88
  -6  -3   7    4.88    1.61
  -6  -3   7    6.84    1.33
   5   3  -7    3.20    1.10
   5   3  -7    6.22    1.20
  -5  -3   7    3.35    1.43
  -5  -3   7    4.48    1.14
   4   3  -7    4.45    1.16
   4   3  -7    4.18    1.00
  -4  -3   7    3.81    1.30
  -4  -3   7    4.96    0.96
   3   3  -7   42.09    1.58
   3   3  -7   36.57    1.98
  -3  -3   7   39.28    1.41
  -3  -3   7   42.21    2.12
   2   3  -7  110.91    3.19
  -2  -3   7  100.22    3.15
   1   3  -7  175.16    4.47
  -1  -3   7  174.99    4.45
   0   3  -7   34.10    1.64
   0   3  -7   37.01    1.82
   0   3  -7   37.77    1.15
   0   3  -7   38.65    1.78
   0  -3   7   38.45    1.78
  -1   3  -7  172.21    4.17
  -1   3  -7  169.66    4.11
  -1   3  -7  168.59    4.55
   1  -3   7  170.81    4.08
  -2   3  -7  103.83    2.77
  -2   3  -7  105.12    3.54
  -2   3  -7  105.24    2.74
  -3   3  -7   41.78    1.47
  -3   3  -7   41.58    1.43
  -4   3  -7    5.92    1.26
  -5   3  -7    4.77    1.29
  -6   3  -7    4.22    1.28
  -7  -2   7   -0.65    1.63
  -7  -2   7    0.96    1.37
  -6  -2   7   -0.21    1.18
  -6  -2   7    0.85    1.43
   5   2  -7   -0.47    0.96
  -5  -2   7    2.70    1.37
  -5  -2   7   -0.24    1.02
   4   2  -7   23.11    1.55
   4   2  -7   22.04    1.65
  -4  -2   7   24.86    1.89
  -4  -2   7   24.59    1.52
   3   2  -7   -0.30    0.59
   3   2  -7    1.61    0.99
  -3  -2   7    1.21    1.10
   2   2  -7    3.87    1.10
  -2  -2   7    4.37    1.12
   1   2  -7    1.88    0.99
  -1  -2   7    1.16    1.00
  -1  -2   7    1.51    0.94
   0   2  -7   16.31    0.95
   0   2  -7   14.89    1.08
   0   2  -7   15.94    1.22
   0   2  -7   14.16    0.83
   0  -2   7   17.98    1.30
  -1   2  -7   -0.03    0.77
  -1   2  -7    0.70    0.76
  -1   2  -7   -0.45    0.65
  -1   2  -7    0.90    0.65
   1  -2   7    1.37    0.80
   1  -2   7    1.93    1.01
  -2   2  -7    5.12    0.70
  -2   2  -7    5.49    0.99
  -2   2  -7    7.11    1.12
  -2   2  -7    4.60    0.79
   2  -2   7    5.51    1.28
  -3   2  -7    0.23    0.90
  -3   2  -7    0.72    0.55
   3  -2   7   -0.32    1.20
  -4   2  -7   23.10    1.69
   4  -2   7   26.44    2.23
  -5   2  -7    1.00    1.06
   5  -2   7    0.82    1.67
  -6   2  -7   -0.34    1.09
  -7  -1   7    3.32    1.48
  -7  -1   7    3.72    1.60
  -6  -1   7   34.23    2.34
  -6  -1   7   29.61    2.14
   5   1  -7    3.44    1.01
  -5  -1   7    1.72    1.14
  -5  -1   7    3.39    1.34
   4   1  -7   10.86    1.20
  -4  -1   7    9.77    1.36
   3   1  -7   93.94    2.90
  -3  -1   7   96.03    2.95
   2   1  -7  141.98    3.79
  -2  -1   7  140.70    3.77
   1   1  -7    2.11    0.79
   1   1  -7    1.56    0.88
  -1  -1   7    1.40    0.95
   0   1  -7   53.07    1.79
   0   1  -7   57.29    1.97
   0   1  -7   55.43    2.01
   0  -1   7   55.50    1.82
   0  -1   7   54.67    1.51
   0  -1   7   55.35    1.99
  -1   1  -7    1.53    0.69
  -1   1  -7    2.33    0.78
  -1   1  -7    1.67    0.67
   1  -1   7    1.56    0.78
   1  -1   7    2.76    0.98
   1  -1   7    1.49    0.74
  -2   1  -7  141.36    4.20
  -2   1  -7  146.96    3.56
  -2   1  -7  144.23    3.40
   2  -1   7  139.30    4.22
  -3   1  -7   91.34    2.80
   3  -1   7   87.94    3.30
  -4   1  -7    6.70    1.16
   4  -1   7   10.07    1.71
  -5   1  -7    4.69    1.18
   5  -1   7    2.35    1.71
  -6   1  -7   38.13    2.40
   6  -1   7   32.47    2.94
  -7   1  -7    0.58    1.47
  -7   0   7    2.56    1.39
  -7   0   7    0.09    1.49
  -6   0   7   -1.42    1.24
  -6   0   7   -2.17    1.34
   5   0  -7    6.21    1.06
  -5   0   7    5.47    1.36
   4   0  -7    3.83    0.98
  -4   0   7    4.55    1.01
  -4   0   7    3.72    1.12
   3   0  -7   24.76    1.61
  -3   0   7   27.21    1.72
  -3   0   7   26.33    1.34
   2   0  -7  200.00    4.95
  -2   0   7  211.05    5.02
   1   0  -7   34.87    1.71
  -1   0   7   31.30    1.64
   0   0  -7   -0.97    0.65
   0   0   7   -1.36    0.88
   0   0   7   -0.02    0.72
  -1   0  -7   33.20    1.48
  -1   0  -7   32.76    1.76
   1   0   7   33.02    1.53
   1   0   7   32.41    1.49
   1   0   7   34.06    1.86
  -2   0  -7  212.85    4.76
  -2   0  -7  209.22    5.60
  -2   0  -7  213.53    4.75
   2   0   7  214.63    4.80
   2   0   7  207.86    5.61
  -3   0  -7   25.88    1.14
  -3   0  -7   26.14    1.62
   3   0   7   26.71    2.09
  -4   0  -7    5.17    1.03
   4   0   7    6.29    1.54
  -5   0  -7    5.89    1.26
   5   0   7    3.19    1.72
  -6   0  -7   -0.41    1.25
   6   0   7   -0.88    1.73
  -7   0  -7    2.96    1.57
   7   0   7    1.38    2.04
  -7   1   7    2.02    1.54
  -7   1   7    3.93    1.65
  -6   1   7   31.91    2.18
   5  -1  -7    1.28    0.89
  -5   1   7    1.10    1.17
   4  -1  -7   11.73    1.16
  -4   1   7    7.69    1.23
  -4   1   7   10.58    1.13
   3  -1  -7   89.07    2.74
  -3   1   7   91.40    2.64
  -3   1   7   89.90    2.82
  -2   1   7  142.34    3.78
   1  -1  -7    2.11    0.79
  -1   1   7    1.97    0.99
   0  -1  -7   54.20    2.01
   0   1   7   56.70    2.00
  -1  -1  -7    1.68    0.70
   1   1   7    1.89    0.76
   1   1   7    2.32    0.85
   1   1   7    0.73    0.98
  -2  -1  -7  145.64    3.51
  -2  -1  -7  139.87    4.12
  -2  -1  -7  139.84    3.41
   2   1   7  145.45    3.56
   2   1   7  137.45    4.18
   2   1   7  136.95    3.31
  -3  -1  -7   89.05    2.66
  -3  -1  -7   87.25    2.35
   3   1   7   91.72    3.32
  -4  -1  -7    8.51    1.10
  -4  -1  -7    8.95    0.81
   4   1   7   10.91    1.70
  -5  -1  -7    3.00    1.16
   5   1   7    2.44    1.70
  -6  -1  -7   34.94    2.38
   6   1   7   32.36    2.90
  -7  -1  -7    1.77    1.51
   7   1   7    4.17    2.10
  -7   2   7    4.90    1.54
  -6   2   7    2.41    1.30
   5  -2  -7    1.68    0.87
  -5   2   7    1.24    1.18
   4  -2  -7   23.90    1.57
  -4   2   7   16.93    1.47
  -4   2   7   22.27    1.68
   3  -2  -7    0.23    0.87
  -3   2   7    1.00    0.85
  -3   2   7    0.19    0.97
  -2   2   7    4.99    1.08
  -1   2   7    0.99    0.95
   0  -2  -7   16.59    1.13
   0   2   7   11.60    1.15
  -1  -2  -7    0.81    0.72
   1   2   7    0.63    1.00
   1   2   7    0.80    0.91
  -2  -2  -7    6.80    0.86
   2   2   7    6.34    1.30
   2   2   7    5.52    0.88
   2   2   7    4.95    0.99
  -3  -2  -7    0.43    0.67
  -3  -2  -7    0.36    0.73
   3   2   7    0.24    1.21
   3   2   7    1.30    0.92
  -4  -2  -7   25.37    1.39
  -4  -2  -7   22.02    1.63
   4   2   7   21.19    2.03
  -5  -2  -7   -0.77    1.07
   5   2   7   -0.18    1.56
  -6  -2  -7   -0.54    1.25
   6   2   7    0.07    1.81
  -7  -2  -7    1.10    1.57
   7   2   7    4.27    2.15
  -7   3   7    7.19    1.56
  -6   3   7    3.31    1.32
  -5   3   7    5.62    1.29
   4  -3  -7    4.18    1.00
  -4   3   7    5.86    1.04
  -4   3   7    4.16    1.14
  -3   3   7   40.26    1.96
  -2   3   7  104.21    3.12
  -1   3   7  163.65    4.21
   0  -3  -7   37.42    1.83
   0   3   7   39.23    1.87
  -1  -3  -7  166.61    4.16
   1   3   7  168.03    4.18
  -2  -3  -7  105.11    2.85
   2   3   7   99.07    3.42
   2   3   7   99.37    2.88
   2   3   7   99.29    2.80
  -3  -3  -7   39.72    1.67
   3   3   7   37.75    1.53
   3   3   7   39.70    2.37
  -4  -3  -7    4.97    0.92
   4   3   7    4.32    1.52
  -5  -3  -7    5.96    1.30
   5   3   7    8.38    1.89
  -6  -3  -7    3.59    1.44
   6   3   7    4.26    2.00
   7   3   7   10.13    2.46
  -7   4   7   -0.43    1.29
  -6   4   7    6.47    1.41
  -5   4   7    7.47    1.35
   4  -4  -7    2.38    0.94
  -4   4   7    2.01    1.10
  -3   4   7   10.83    1.29
  -2   4   7   49.06    2.14
  -1   4   7  261.07    6.19
   0   4   7  143.94    3.84
  -1  -4  -7  217.66    5.58
   1   4   7  256.72    5.68
  -2  -4  -7   47.94    2.00
   2   4   7   46.58    1.98
   2   4   7   46.35    1.92
  -3  -4  -7   14.18    1.15
   3   4   7   12.25    1.11
   3   4   7   12.83    1.65
  -4  -4  -7    3.38    0.98
   4   4   7    2.11    1.50
   5   4   7    5.40    1.84
   6   4   7    4.90    1.98
   7   4   7   -3.97    1.94
  -7   5   7    7.50    1.56
  -6   5   7    7.59    1.46
  -5   5   7    9.32    1.41
  -4   5   7    0.94    1.15
  -3   5   7   74.72    2.71
  -2   5   7   22.16    1.75
  -1   5   7   76.51    2.66
   0   5   7    4.36    1.16
   1   5   7   76.20    2.59
   2   5   7   17.62    1.39
   2   5   7   18.06    1.33
  -3  -5  -7   64.70    2.42
   3   5   7   72.23    3.08
   3   5   7   69.33    2.33
  -4  -5  -7    3.06    1.05
   4   5   7    4.68    0.97
   4   5   7    4.05    1.59
   5   5   7   13.79    2.18
   6   5   7    3.59    1.98
   7   5   7    6.33    2.31
  -7   6   7    3.16    1.45
  -6   6   7    7.58    1.49
  -5   6   7    9.08    1.45
  -4   6   7   10.69    1.47
  -3   6   7   58.44    2.44
  -2   6   7   57.40    2.34
  -1   6   7   47.84    2.17
   0   6   7  110.37    3.30
   1   6   7   47.30    2.15
   2   6   7   58.86    2.35
   3   6   7   59.84    2.28
   3   6   7   55.42    2.91
   4   6   7    8.88    1.88
   4   6   7   11.95    1.28
   5   6   7   15.51    2.27
   6   6   7    6.72    2.11
   7   6   7    2.51    2.17
  -7   7   7   -0.81    1.41
  -6   7   7    4.08    1.39
  -5   7   7    1.74    1.33
  -4   7   7   -0.59    1.21
  -3   7   7   12.56    1.51
  -2   7   7   47.84    2.27
  -1   7   7   52.60    2.31
   0   7   7   15.51    1.48
   1   7   7   55.16    2.37
   2   7   7   50.34    2.30
   3   7   7   18.16    1.59
   4   7   7   -1.79    1.03
   4   7   7    2.78    1.69
   5   7   7    0.86    1.75
   6   7   7    4.15    2.04
   7   7   7   -0.60    2.10
  -6   8   7    6.82    1.53
  -5   8   7    1.58    1.38
  -4   8   7   19.63    1.80
  -3   8   7   11.96    1.53
  -2   8   7    7.88    1.35
  -1   8   7   20.10    1.67
   0   8   7  207.48    5.40
   1   8   7   22.46    1.88
   2   8   7    4.80    1.38
   3   8   7   17.06    1.70
   4   8   7   19.89    2.30
   4   8   7   22.71    1.81
   5   8   7    0.55    1.77
   6   8   7    6.76    2.28
  -6   9   7    1.19    1.51
  -5   9   7    3.64    1.52
  -4   9   7    4.63    1.51
  -3   9   7   14.66    1.67
  -2   9   7   18.48    1.72
  -1   9   7   60.78    2.65
   0   9   7   20.06    1.75
   1   9   7   65.22    2.79
   2   9   7   27.26    2.11
   3   9   7   17.92    1.84
   4   9   7    3.61    1.38
   4   9   7    1.97    1.74
   5   9   7    5.10    2.08
   6   9   7    4.17    2.20
  -6  10   7    7.43    1.74
  -5  10   7    1.02    1.49
  -4  10   7    7.34    1.59
  -3  10   7    0.11    1.36
  -2  10   7    4.57    1.46
  -1  10   7   15.94    1.73
   0  10   7    1.23    1.33
   1  10   7   19.01    1.86
   2  10   7    3.05    1.43
   3  10   7    0.11    1.40
   4  10   7    7.89    1.74
   5  10   7    1.87    1.99
   6  10   7    5.38    2.25
  -5  11   7    4.83    1.69
  -4  11   7   -0.76    1.37
  -3  11   7   -0.12    1.39
  -2  11   7   33.60    2.40
  -1  11   7    3.83    1.53
   0  11   7    1.62    1.44
   1  11   7   -1.08    1.46
   2  11   7   34.19    2.50
   3  11   7   -0.28    1.50
   4  11   7    0.94    1.52
   5  11   7    0.95    2.10
  -5  12   7    0.31    1.58
  -4  12   7    2.25    1.56
  -3  12   7    1.40    1.50
  -2  12   7   10.31    1.75
   0  12   7    3.59    1.67
   1  12   7   47.81    2.87
   2  12   7    7.45    1.90
   3  12   7    0.82    1.58
   5  12   7   -0.26    2.07
  -5  13   7    1.24    1.71
  -4  13   7    2.78    1.66
  -3  13   7    0.22    1.50
  -2  13   7    4.76    1.65
  -1  13   7    0.82    1.62
   0  13   7   -1.35    1.59
   1  13   7    2.93    1.74
   2  13   7    9.04    2.06
   3  13   7   -0.06    1.71
  -4  14   7    2.48    1.74
  -3  14   7    8.13    1.86
  -2  14   7    4.64    1.77
  -1  14   7    2.25    1.71
   0  14   7    9.28    1.96
   1  14   7    1.23    1.84
   2  14   7    5.10    1.83
   3  14   7    4.99    1.93
  -3  15   7    3.47    1.80
  -2  15   7    4.36    1.78
  -1  15   7    5.53    1.88
   0  15   7    2.03    1.85
   1  15   7    2.65    2.02
   2  15   7    6.45    2.16
   3  15   7    2.13    1.96
  -2  16   7    1.64    1.85
  -1  16   7    2.53    1.90
   0  16   7    8.96    2.18
   1  16   7    8.93    2.30
   2  16   7    0.62    1.93
   0  17   7    4.17    2.12
   2  16  -8    1.30    2.03
   1  16  -8    2.01    1.92
   0  16  -8    2.52    1.84
  -1  16  -8    2.16    1.79
  -2  16  -8    1.61    1.71
   3  15  -8    5.47    2.19
   2  15  -8    4.33    2.07
   1  15  -8   18.89    2.46
   0  15  -8    6.09    1.92
  -1  15  -8   23.86    2.44
  -2  15  -8    5.47    1.73
  -3  15  -8    5.73    1.78
   4  14  -8    4.35    2.13
  -4 -14   8    3.82    2.06
   3  14  -8    1.21    1.98
  -3 -14   8    0.99    1.84
   2  14  -8   33.34    2.80
   1  14  -8    1.99    1.78
   0  14  -8   -0.36    1.59
  -1  14  -8    3.71    1.61
  -2  14  -8   34.49    2.67
  -3  14  -8    2.39    1.50
  -4  14  -8    2.35    1.52
   4  13  -8    0.85    1.98
  -4 -13   8    0.60    1.81
   3  13  -8   16.61    2.35
  -3 -13   8   18.95    2.33
   2  13  -8    0.00    1.71
  -2 -13   8   -0.99    1.61
   1  13  -8    3.70    1.75
  -1 -13   8    6.00    1.77
   0  13  -8    8.18    1.81
  -1  13  -8    4.70    1.58
  -2  13  -8    0.59    1.39
  -3  13  -8   17.04    1.94
  -4  13  -8    5.00    1.54
  -5 -12   8    1.34    1.80
   4  12  -8   10.98    2.17
  -4 -12   8   13.28    2.12
   3  12  -8   14.80    2.20
  -3 -12   8   15.15    2.12
   2  12  -8   16.91    2.17
  -2 -12   8   23.02    2.26
   1  12  -8   48.87    2.90
  -1 -12   8   46.84    2.78
   0  12  -8   -1.00    1.38
  -1  12  -8   52.71    2.86
  -2  12  -8   20.06    1.99
  -3  12  -8   13.75    1.74
  -4  12  -8   12.08    1.65
  -5  12  -8    5.00    1.41
  -5 -11   8    1.26    1.82
   4  11  -8   -2.74    1.66
  -4 -11   8    0.99    1.66
   3  11  -8    7.42    1.89
  -3 -11   8    8.12    1.85
   2  11  -8   11.28    1.92
  -2 -11   8   12.26    1.90
   1  11  -8    3.34    1.59
  -1 -11   8    4.22    1.55
   0  11  -8   79.75    3.34
   0 -11   8   78.37    3.22
  -1  11  -8    3.19    1.43
  -2  11  -8   10.28    1.59
  -3  11  -8    8.53    1.48
  -4  11  -8    0.90    1.19
  -5  11  -8   -0.15    1.22
  -6 -10   8    5.20    2.02
   5  10  -8    1.91    1.71
  -5 -10   8    1.97    1.78
   4  10  -8   -2.51    1.58
  -4 -10   8    1.40    1.61
   3  10  -8    6.75    1.80
  -3 -10   8    7.31    1.73
   2  10  -8   16.27    1.96
  -2 -10   8   21.14    2.04
   1  10  -8  122.72    4.13
  -1 -10   8  119.35    4.03
   0  10  -8   68.02    2.99
   0 -10   8   67.69    2.90
  -1  10  -8  110.70    3.76
  -2  10  -8   20.71    1.83
  -3  10  -8    6.47    1.34
  -4  10  -8   -0.76    1.12
  -5  10  -8    3.72    1.20
  -6  -9   8    6.31    1.99
   5   9  -8    1.22    1.57
  -5  -9   8    5.03    1.79
   4   9  -8    9.83    1.86
  -4  -9   8    6.43    1.72
   3   9  -8   23.24    2.16
  -3  -9   8   24.24    2.14
   2   9  -8   45.79    2.64
   2   9  -8   45.40    1.47
  -2  -9   8   46.74    2.53
   1   9  -8   10.24    1.62
  -1  -9   8    9.36    1.58
   0   9  -8   41.35    2.37
   0  -9   8   43.80    2.32
  -1   9  -8   10.48    1.49
   1  -9   8   12.94    1.48
  -2   9  -8   45.56    2.35
  -3   9  -8   25.43    1.94
  -4   9  -8   10.63    1.33
  -5   9  -8    2.82    1.08
  -6  -8   8    3.13    1.91
   5   8  -8    0.29    1.46
  -5  -8   8    0.80    1.63
   4   8  -8    3.03    1.58
   4   8  -8    4.91    1.35
  -4  -8   8    3.88    1.60
   3   8  -8    5.38    1.59
  -3  -8   8    8.99    1.65
   2   8  -8   69.92    2.88
  -2  -8   8   61.40    2.75
   1   8  -8   19.34    1.76
  -1  -8   8   21.93    1.79
   0   8  -8    7.98    1.34
   0  -8   8    7.23    1.34
  -1   8  -8   21.57    1.71
   1  -8   8   20.88    1.75
  -2   8  -8   68.35    2.66
  -3   8  -8    7.58    1.23
  -4   8  -8    4.58    1.09
  -5   8  -8    2.14    1.02
  -6  -7   8    4.02    1.80
   5   7  -8   -1.27    1.23
   5   7  -8   -1.84    1.36
  -5  -7   8    0.04    1.53
   4   7  -8   13.77    1.78
   4   7  -8   13.19    1.35
  -4  -7   8    9.90    1.74
   3   7  -8   12.13    1.67
  -3  -7   8   16.67    1.75
   2   7  -8   25.63    2.00
  -2  -7   8   21.50    1.81
   1   7  -8   77.76    2.91
  -1  -7   8   78.94    2.84
   0   7  -8   24.65    1.85
   0  -7   8   26.56    1.87
  -1   7  -8   79.08    2.80
   1  -7   8   79.37    2.68
  -2   7  -8   23.43    1.74
  -3   7  -8   15.31    1.24
  -3   7  -8   15.13    1.33
  -4   7  -8    8.84    1.13
  -5   7  -8    0.45    0.86
  -6   7  -8    6.61    1.74
  -7  -6   8    8.83    2.08
  -6  -6   8    8.87    1.93
   5   6  -8   26.01    2.10
   5   6  -8   26.83    1.93
  -5  -6   8   22.96    2.17
   4   6  -8    9.02    1.13
   4   6  -8    6.49    1.50
  -4  -6   8    5.66    1.57
   3   6  -8   18.08    1.71
  -3  -6   8   16.26    1.72
   2   6  -8   19.84    1.67
  -2  -6   8   18.60    1.66
   1   6  -8   35.50    2.07
  -1  -6   8   37.95    2.08
   0   6  -8    1.87    1.02
   0  -6   8    0.82    1.06
  -1   6  -8   37.54    1.92
   1  -6   8   34.79    1.82
  -2   6  -8   19.52    1.30
  -2   6  -8   18.84    1.54
   2  -6   8   18.90    1.34
  -3   6  -8   16.23    1.26
  -3   6  -8   18.59    1.23
  -4   6  -8    6.84    0.97
  -6   6  -8   11.56    1.91
  -7  -5   8    0.08    1.82
  -6  -5   8    1.59    1.62
   5   5  -8    6.77    1.53
   5   5  -8    7.09    1.24
  -5  -5   8    6.70    1.67
   4   5  -8   34.89    2.19
   4   5  -8   34.88    1.85
  -4  -5   8   42.10    2.42
   3   5  -8   44.46    2.29
   3   5  -8   46.44    1.80
  -3  -5   8   44.65    2.35
   2   5  -8   52.95    2.28
  -2  -5   8   45.57    2.29
   1   5  -8   76.53    2.74
  -1  -5   8   73.00    2.70
   0   5  -8   18.86    1.50
   0  -5   8   19.60    1.51
  -1   5  -8   72.10    2.75
  -1   5  -8   76.60    2.51
  -1   5  -8   68.91    2.49
   1  -5   8   74.27    2.40
  -2   5  -8   49.44    1.98
  -2   5  -8   51.83    1.98
   2  -5   8   52.68    1.82
  -3   5  -8   47.03    1.82
  -3   5  -8   48.15    1.83
  -4   5  -8   37.78    1.58
  -4   5  -8   37.67    1.59
  -5   5  -8    6.48    1.46
  -6   5  -8    0.63    1.39
  -7  -4   8    7.59    1.89
  -6  -4   8    0.77    1.10
  -6  -4   8    0.22    1.59
   5   4  -8    7.28    1.30
   5   4  -8    2.48    1.24
  -5  -4   8    3.23    1.04
  -5  -4   8    4.14    1.56
   4   4  -8   17.81    1.48
   4   4  -8   18.07    1.62
  -4  -4   8   16.49    1.22
  -4  -4   8   15.11    1.71
   3   4  -8   12.44    1.37
  -3  -4   8   10.32    1.41
   2   4  -8   70.49    2.63
  -2  -4   8   72.55    2.68
   1   4  -8  134.58    3.73
  -1  -4   8  127.74    3.68
   0   4  -8    1.68    0.99
   0  -4   8    2.63    1.10
  -1   4  -8  132.29    3.56
  -1   4  -8  130.97    3.52
  -1   4  -8  132.20    3.91
   1  -4   8  133.18    3.47
  -2   4  -8   71.23    2.20
  -2   4  -8   65.44    2.22
   2  -4   8   69.26    2.04
  -3   4  -8   14.38    1.02
  -3   4  -8   12.83    0.93
  -4   4  -8   16.09    1.57
  -5   4  -8    4.21    1.32
  -6   4  -8    2.15    1.40
  -7  -3   8    2.64    1.76
  -6  -3   8    7.31    1.74
  -6  -3   8   10.18    1.44
   5   3  -8    2.02    1.14
  -5  -3   8    0.18    1.00
  -5  -3   8    0.71    1.38
   4   3  -8   24.49    1.80
   4   3  -8   25.33    1.54
  -4  -3   8   24.64    1.44
  -4  -3   8   24.70    2.07
   3   3  -8   36.26    1.98
  -3  -3   8   40.44    2.15
  -3  -3   8   38.43    1.35
   2   3  -8    2.64    1.07
  -2  -3   8    0.43    1.11
   1   3  -8   92.49    2.92
  -1  -3   8   93.31    2.96
   0   3  -8  144.99    3.69
   0   3  -8  133.60    3.65
   0   3  -8  140.54    3.74
   0   3  -8  137.47    2.91
   0  -3   8  139.61    3.70
  -1   3  -8   93.15    2.72
  -1   3  -8   94.45    2.77
  -1   3  -8   92.68    3.05
  -1   3  -8   94.75    2.48
   1  -3   8   94.17    2.68
  -2   3  -8    1.98    0.85
  -2   3  -8    1.57    0.79
  -2   3  -8    1.94    0.68
   2  -3   8    0.92    0.64
  -3   3  -8   34.84    1.40
  -3   3  -8   34.94    1.37
  -3   3  -8   31.91    1.85
  -4   3  -8   26.30    1.92
  -5   3  -8    0.42    1.17
  -6   3  -8   11.83    1.65
  -7  -2   8    3.51    1.71
  -6  -2   8    1.79    1.49
  -6  -2   8    1.04    1.17
   5   2  -8    4.39    1.14
  -5  -2   8    8.20    1.24
  -5  -2   8    6.21    1.54
   4   2  -8   30.00    1.85
  -4  -2   8   30.17    2.09
  -4  -2   8   29.37    1.58
   3   2  -8   15.13    1.37
  -3  -2   8   16.39    1.52
   2   2  -8   29.57    1.87
  -2  -2   8   34.36    1.94
   1   2  -8   68.99    2.42
  -1  -2   8   66.43    2.44
   0   2  -8    1.24    0.60
   0   2  -8    1.20    0.90
   0   2  -8   -0.69    0.72
   0  -2   8    0.39    1.01
  -1   2  -8   72.64    2.18
  -1   2  -8   68.98    2.25
  -1   2  -8   66.60    2.01
  -1   2  -8   65.67    2.47
   1  -2   8   62.10    2.52
   1  -2   8   66.86    2.18
  -2   2  -8   31.51    1.44
  -2   2  -8   30.89    1.52
  -2   2  -8   31.37    1.61
  -2   2  -8   28.68    2.13
   2  -2   8   31.73    2.19
   2  -2   8   30.31    1.27
  -3   2  -8   13.29    1.27
  -3   2  -8   14.86    1.04
  -3   2  -8   16.12    0.95
   3  -2   8   17.57    1.79
  -4   2  -8   29.60    1.89
   4  -2   8   31.58    2.46
  -5   2  -8    8.91    1.44
   5  -2   8    8.29    2.00
  -6   2  -8    2.45    1.23
  -7  -1   8    3.33    1.46
  -7  -1   8    2.58    1.62
  -6  -1   8   11.55    1.72
  -6  -1   8   16.66    1.68
   5   1  -8    0.88    1.01
  -5  -1   8   -0.90    1.31
   4   1  -8    1.25    1.04
  -4  -1   8    4.88    1.28
   3   1  -8  107.28    3.22
  -3  -1   8  109.89    3.29
   2   1  -8   77.30    2.63
  -2  -1   8   80.53    2.66
   1   1  -8    9.31    1.15
  -1  -1   8    8.16    1.20
   0   1  -8  145.37    3.80
   0   1  -8  155.25    3.86
   0  -1   8  154.43    3.87
   0  -1   8  154.25    3.83
   0  -1   8  155.70    3.26
  -1   1  -8    9.46    0.88
  -1   1  -8   11.92    1.09
  -1   1  -8   10.93    0.94
   1  -1   8   10.14    1.05
   1  -1   8    7.17    0.91
   1  -1   8    6.71    1.16
  -2   1  -8   80.93    2.48
  -2   1  -8   84.37    3.04
  -2   1  -8   82.41    2.33
   2  -1   8   84.68    3.07
   2  -1   8   81.53    2.18
  -3   1  -8  103.05    3.08
  -3   1  -8  105.02    2.62
   3  -1   8  105.97    3.67
  -4   1  -8    3.08    1.05
   4  -1   8    3.03    1.52
  -5   1  -8    2.12    1.09
   5  -1   8    1.68    1.72
  -6   1  -8   12.39    1.66
   6  -1   8   16.25    2.40
  -7   0   8   -0.10    1.55
  -7   0   8    2.40    1.44
  -6   0   8    8.35    1.53
  -6   0   8    9.37    1.66
   5   0  -8    2.81    1.02
  -5   0   8    2.10    1.30
   4   0  -8    4.77    1.08
  -4   0   8    4.41    1.22
  -4   0   8    1.80    0.90
   3   0  -8  146.36    3.92
  -3   0   8  146.22    4.00
  -3   0   8  149.02    3.67
   2   0  -8   45.53    2.00
  -2   0   8   43.79    2.06
  -1   0   8  112.47    3.16
   0   0  -8   -0.32    0.71
   0   0   8   -0.04    0.78
   0   0   8    0.34    0.95
  -1   0  -8  113.21    3.34
  -1   0  -8  114.16    3.03
   1   0   8  115.26    3.40
   1   0   8  113.37    3.00
   1   0   8  115.58    2.87
  -2   0  -8   46.13    2.27
  -2   0  -8   43.78    1.66
  -2   0  -8   44.71    1.87
   2   0   8   42.74    1.56
   2   0   8   46.49    2.31
   2   0   8   44.57    1.96
  -3   0  -8  148.91    3.85
  -3   0  -8  147.88    3.50
   3   0   8  148.43    4.58
  -4   0  -8    1.80    0.96
   4   0   8    1.96    1.49
  -5   0  -8    2.18    1.05
   5   0   8    4.77    1.75
  -6   0  -8    8.78    1.53
   6   0   8    6.86    2.07
   7   0   8    0.78    2.15
  -7   1   8    3.36    1.58
  -7   1   8    6.62    1.68
  -6   1   8   14.71    1.72
   5  -1  -8    1.02    0.95
  -5   1   8    0.29    1.21
   4  -1  -8    4.74    1.05
  -4   1   8    2.87    1.18
  -4   1   8    3.23    1.00
   3  -1  -8   98.76    3.01
  -3   1   8  100.69    2.78
  -3   1   8  100.88    3.10
  -2   1   8   79.03    2.64
  -1   1   8    8.07    1.19
   0  -1  -8  157.13    3.92
   0   1   8  157.05    4.02
   0   1   8  152.73    3.94
  -1  -1  -8    9.60    0.96
   1   1   8    9.31    0.97
   1   1   8    8.22    1.06
   1   1   8    7.92    1.20
  -2  -1  -8   81.06    2.35
   2   1   8   78.94    2.47
   2   1   8   78.22    2.25
   2   1   8   79.81    3.03
  -3  -1  -8  100.28    2.65
  -3  -1  -8  105.16    2.99
   3   1   8   99.38    3.58
  -4  -1  -8    3.10    0.95
  -4  -1  -8    3.05    0.71
   4   1   8    5.51    1.54
  -5  -1  -8    0.56    1.02
   5   1   8    1.19    1.66
  -6  -1  -8   15.95    1.82
   6   1   8   16.60    2.44
   7   1   8    2.04    2.10
  -7   2   8    1.61    1.50
  -6   2   8    2.73    1.36
   5  -2  -8    8.34    1.15
  -5   2   8   11.28    1.48
   4  -2  -8   32.54    1.80
  -4   2   8   30.70    1.77
  -4   2   8   28.09    1.87
   3  -2  -8   12.66    1.23
  -3   2   8   14.85    1.09
  -3   2   8   13.50    1.35
  -2   2   8   31.79    1.81
  -1   2   8   68.10    2.46
   0  -2  -8   -1.10    0.78
   0   2   8   -0.57    0.99
  -1  -2  -8   64.26    2.24
   1   2   8   68.05    2.30
   1   2   8   69.71    2.61
  -2  -2  -8   33.00    1.56
   2   2   8   30.32    1.52
   2   2   8   28.41    1.70
   2   2   8   28.29    2.09
  -3  -2  -8   16.53    1.26
   3   2   8   12.91    1.03
   3   2   8   15.39    1.72
  -4  -2  -8   28.27    1.72
  -4  -2  -8   26.28    1.47
   4   2   8   26.97    2.35
  -5  -2  -8    8.23    1.39
   5   2   8    9.31    1.93
  -6  -2  -8    0.88    1.34
   6   2   8   -0.57    1.80
   7   2   8    3.08    2.11
  -7   3   8   -0.44    1.41
  -6   3   8   11.55    1.57
  -5   3   8    0.27    1.22
   4  -3  -8   26.29    1.64
  -4   3   8   26.31    1.84
  -4   3   8   21.54    1.80
  -3   3   8   34.12    1.91
  -2   3   8    0.64    1.02
  -1   3   8   90.30    2.92
   0   3   8  132.91    3.65
  -1  -3  -8   88.96    2.73
   1   3   8   91.09    2.81
  -2  -3  -8    1.64    0.80
   2   3   8    1.29    0.89
   2   3   8    0.99    0.89
   2   3   8    0.79    1.18
  -3  -3  -8   36.11    1.68
   3   3   8   34.09    2.31
   3   3   8   31.66    1.47
  -4  -3  -8   25.81    1.57
   4   3   8   24.11    2.21
   5   3   8    0.85    1.66
   6   3   8   12.76    2.35
   7   3   8    2.62    2.03
  -7   4   8    9.36    1.60
  -6   4   8    1.06    1.32
  -5   4   8    3.26    1.30
   4  -4  -8   17.61    1.41
  -4   4   8   15.33    1.51
  -3   4   8   13.92    1.41
  -2   4   8   66.30    2.52
  -1   4   8  130.70    3.68
   0   4   8    1.37    1.12
   1   4   8  132.81    3.68
  -2  -4  -8   67.91    2.37
   2   4   8   66.33    2.34
   2   4   8   71.35    2.93
   2   4   8   65.44    2.38
  -3  -4  -8   14.45    1.21
   3   4   8   11.13    1.65
   3   4   8   14.07    1.15
  -4  -4  -8   16.20    1.30
   4   4   8   17.50    2.08
   5   4   8    1.73    1.78
   6   4   8   -0.28    1.80
   7   4   8    4.34    2.23
  -7   5   8    1.01    1.43
  -6   5   8   -0.29    1.31
  -5   5   8    3.07    1.30
  -4   5   8   34.37    2.10
  -3   5   8   46.78    2.26
  -2   5   8   51.27    2.28
  -1   5   8   65.97    2.56
   0   5   8   18.34    1.51
   1   5   8   68.68    2.50
   2   5   8   48.13    2.10
   2   5   8   50.61    2.16
   3   5   8   42.45    1.97
   3   5   8   42.80    2.59
   4   5   8   32.55    2.59
   5   5   8    3.53    1.87
   6   5   8    0.71    1.90
   7   5   8    1.52    2.18
  -7   6   8   10.47    1.70
  -6   6   8    6.89    1.51
  -5   6   8   21.55    1.82
  -4   6   8    5.24    1.37
  -3   6   8   13.76    1.52
  -2   6   8   18.80    1.60
  -1   6   8   35.85    2.01
   0   6   8   -0.32    1.05
   1   6   8   34.78    1.93
   2   6   8   18.83    1.54
   3   6   8   14.27    1.87
   3   6   8   16.56    1.46
   4   6   8    3.97    1.06
   4   6   8    7.27    1.80
   5   6   8   25.79    2.66
   6   6   8    7.68    2.16
   7   6   8   10.32    2.45
  -6   7   8    5.21    1.49
  -5   7   8    1.28    1.33
  -4   7   8    9.49    1.51
  -3   7   8    9.91    1.47
  -2   7   8   22.48    1.85
  -1   7   8   71.62    2.73
   0   7   8   19.76    1.63
   1   7   8   69.56    2.65
   2   7   8   21.90    1.69
   3   7   8   11.10    1.48
   4   7   8    9.11    1.91
   4   7   8    7.48    1.24
   5   7   8   -0.51    1.72
   6   7   8    4.92    2.15
  -6   8   8    4.06    1.55
  -5   8   8   -0.40    1.35
  -4   8   8    2.69    1.40
  -3   8   8    5.78    1.43
  -2   8   8   61.47    2.66
  -1   8   8   20.62    1.70
   0   8   8    5.45    1.33
   1   8   8   18.41    1.70
   2   8   8   59.48    2.63
   3   8   8    4.65    1.33
   4   8   8    1.30    1.70
   4   8   8    2.23    1.23
   5   8   8   -1.87    1.75
   6   8   8   -1.20    1.92
  -6   9   8    4.83    1.62
  -5   9   8    2.92    1.52
  -4   9   8    8.75    1.64
  -3   9   8   19.95    1.84
  -2   9   8   40.50    2.37
  -1   9   8    6.82    1.45
   0   9   8   40.88    2.37
   1   9   8    8.60    1.57
   2   9   8   47.04    2.49
   3   9   8   21.19    1.95
   4   9   8    5.74    1.46
   4   9   8    5.88    1.89
   5   9   8    0.17    1.87
   6   9   8    8.90    2.50
  -6  10   8    2.37    1.66
  -5  10   8    3.44    1.59
  -4  10   8   -0.01    1.46
  -3  10   8    6.04    1.58
  -2  10   8   14.09    1.73
  -1  10   8  104.79    3.70
   0  10   8   63.60    2.87
   1  10   8  106.05    3.73
   2  10   8   15.76    1.91
   3  10   8    8.75    1.75
   4  10   8   -0.51    1.39
   4  10   8   -0.59    1.80
   5  10   8    1.37    2.02
   6  10   8    3.98    2.27
  -5  11   8   -0.62    1.56
  -4  11   8   -0.65    1.48
  -3  11   8    6.44    1.60
  -2  11   8    8.42    1.66
  -1  11   8    1.49    1.44
   0  11   8   65.56    3.06
   1  11   8    3.07    1.62
   2  11   8   11.14    1.92
   3  11   8    5.59    1.64
   5  11   8    2.66    2.12
  -5  12   8    2.56    1.73
  -4  12   8    9.16    1.86
  -3  12   8   11.10    1.83
  -2  12   8   18.87    1.99
  -1  12   8   48.76    2.83
   0  12   8   -1.54    1.53
   1  12   8   42.63    2.77
   2  12   8   20.45    2.25
   3  12   8   12.78    2.10
   5  12   8    0.41    2.12
  -4  13   8    2.85    1.69
  -3  13   8   12.44    1.94
  -2  13   8   -0.40    1.54
  -1  13   8    4.25    1.69
   0  13   8    7.52    1.82
   1  13   8    6.14    1.92
   2  13   8   -0.94    1.62
   3  13   8   17.59    2.36
  -4  14   8    0.92    1.68
  -3  14   8    0.30    1.59
  -1  14   8    1.68    1.66
   0  14   8    2.43    1.82
   1  14   8    2.75    1.88
   2  14   8   32.14    2.79
   3  14   8    2.26    1.84
  -3  15   8    4.98    1.88
  -2  15   8    5.00    1.78
   0  15   8    7.03    2.02
   1  15   8   18.37    2.50
   2  15   8    2.50    1.91
   3  15   8    4.25    2.00
  -2  16   8    1.55    1.82
  -1  16   8    0.90    1.84
   0  16   8    3.06    2.00
   1  16   8    3.02    2.15
   2  16   8   -0.09    1.89
   2  16  -9    1.84    2.08
   1  16  -9   -0.70    1.90
   0  16  -9   11.00    2.20
  -1  16  -9    1.88    1.82
  -2  16  -9    2.41    1.75
   3  15  -9    6.14    2.25
   2  15  -9    4.54    2.08
   1  15  -9   10.02    2.18
   0  15  -9    2.20    1.79
  -1  15  -9   17.15    2.24
  -2  15  -9    3.95    1.70
  -3  15  -9    5.18    1.76
   4  14  -9   19.65    2.61
  -4 -14   9   23.70    2.70
   3  14  -9    1.88    2.05
  -3 -14   9    0.36    1.86
   2  14  -9   20.42    2.51
  -2 -14   9   24.10    2.54
   1  14  -9    3.82    1.87
   0  14  -9    5.08    1.84
  -1  14  -9    2.67    1.64
  -2  14  -9   23.28    2.30
  -3  14  -9    0.53    1.50
  -4  14  -9   21.88    2.21
   4  13  -9   11.98    2.35
  -4 -13   9   11.35    2.22
   3  13  -9    1.09    1.87
  -3 -13   9    3.19    1.85
   2  13  -9    3.56    1.85
  -2 -13   9    6.92    1.94
   1  13  -9   -0.60    1.62
  -1 -13   9    1.53    1.68
   0  13  -9    6.45    1.79
  -1  13  -9    4.01    1.59
  -2  13  -9    4.37    1.54
  -3  13  -9    3.77    1.48
  -4  13  -9   12.11    1.77
  -5 -12   9    1.08    1.85
   4  12  -9   26.16    2.59
  -4 -12   9   18.44    2.39
   3  12  -9   33.86    2.84
  -3 -12   9   34.25    2.77
   2  12  -9   18.26    2.22
  -2 -12   9   22.82    2.30
   1  12  -9    4.78    1.71
  -1 -12   9    4.51    1.77
   0  12  -9    5.48    1.69
   0 -12   9   10.56    1.75
  -1  12  -9    4.11    1.55
  -2  12  -9   21.32    2.07
  -3  12  -9   37.76    2.45
  -4  12  -9   27.05    2.24
  -5  12  -9   -0.07    1.26
  -5 -11   9    6.88    1.97
   4  11  -9    5.77    1.96
  -4 -11   9    2.79    1.74
   3  11  -9    1.36    1.70
  -3 -11   9   -0.67    1.59
   2  11  -9   15.31    2.04
  -2 -11   9   22.25    2.21
   1  11  -9   57.59    3.00
  -1 -11   9   55.63    2.89
   0  11  -9    7.86    1.67
   0 -11   9    6.90    1.60
  -1  11  -9   52.34    2.75
  -2  11  -9   22.33    1.98
  -3  11  -9   -1.34    1.21
  -4  11  -9    2.50    1.27
  -5  11  -9    6.03    1.35
  -6 -10   9    3.70    1.97
   5  10  -9   15.46    2.22
  -5 -10   9   11.71    2.09
   4  10  -9    6.57    1.94
  -4 -10   9    8.58    1.90
   3  10  -9    4.73    1.77
  -3 -10   9    2.14    1.64
   2  10  -9    3.24    1.67
  -2 -10   9    1.57    1.56
   1  10  -9    8.21    1.70
  -1 -10   9    7.53    1.67
   0  10  -9   66.94    3.04
   0 -10   9   68.09    2.90
  -1  10  -9    7.05    1.54
   1 -10   9    9.94    1.47
  -2  10  -9    5.59    1.39
  -3  10  -9    2.61    1.25
  -4  10  -9   12.78    1.50
  -5  10  -9   12.88    1.53
  -6  -9   9    3.03    1.94
   5   9  -9    5.35    1.70
  -5  -9   9    3.98    1.82
   4   9  -9    3.60    1.76
  -4  -9   9    3.65    1.68
   3   9  -9   17.07    2.05
  -3  -9   9   16.09    1.98
   2   9  -9    0.81    1.42
  -2  -9   9    1.19    1.42
   1   9  -9    1.44    1.38
  -1  -9   9    2.12    1.40
   0   9  -9  100.83    3.47
   0  -9   9   96.01    3.38
  -1   9  -9    1.71    1.24
   1  -9   9    3.25    1.21
  -2   9  -9    1.27    1.18
  -3   9  -9   19.86    1.65
  -4   9  -9    1.69    1.13
  -5   9  -9    6.11    1.20
  -6  -8   9    5.39    1.95
   5   8  -9    3.83    1.60
  -5  -8   9    4.81    1.76
   4   8  -9   17.23    2.01
   4   8  -9   16.72    1.49
  -4  -8   9   14.56    1.96
   3   8  -9    9.99    1.71
  -3  -8   9    7.88    1.68
   2   8  -9   10.49    1.64
  -2  -8   9   12.61    1.66
   1   8  -9    6.04    1.40
  -1  -8   9    4.93    1.42
   0   8  -9   42.35    2.37
   0  -8   9   43.60    2.27
  -1   8  -9    6.13    1.29
   1  -8   9    5.83    1.22
  -2   8  -9    9.50    1.35
  -3   8  -9    9.52    1.31
  -4   8  -9   17.10    1.45
  -5   8  -9    7.07    1.13
  -6  -7   9    9.08    2.05
   5   7  -9   -0.97    1.45
  -5  -7   9    1.07    1.63
   4   7  -9    3.45    1.15
   4   7  -9    2.60    1.54
  -4  -7   9    4.17    1.58
   3   7  -9    5.30    1.48
  -3  -7   9    5.62    1.51
   2   7  -9   29.99    2.08
  -2  -7   9   29.48    2.09
   1   7  -9    2.59    1.19
  -1  -7   9    1.48    1.27
   0   7  -9   63.68    2.57
   0  -7   9   61.33    2.53
  -1   7  -9    1.98    1.06
   1  -7   9    3.44    1.06
  -2   7  -9   25.73    1.83
   2  -7   9   29.67    1.64
  -3   7  -9    5.83    1.13
  -3   7  -9    6.81    1.05
  -4   7  -9    5.06    1.03
  -5   7  -9    0.81    0.88
  -6   7  -9   14.05    2.03
  -7  -6   9    1.16    1.91
  -6  -6   9    3.65    1.78
   5   6  -9    7.71    1.68
  -5  -6   9    7.86    1.77
   4   6  -9    2.77    1.04
   4   6  -9    3.65    1.48
  -4  -6   9    4.04    1.57
   3   6  -9    3.99    1.35
  -3  -6   9    3.16    1.36
   2   6  -9    1.49    1.21
  -2  -6   9    3.40    1.29
   1   6  -9   47.58    2.27
  -1  -6   9   43.72    2.25
   0   6  -9    1.38    1.06
   0  -6   9    2.67    1.14
  -1   6  -9   45.32    2.13
   1  -6   9   46.22    2.09
  -2   6  -9    2.23    0.96
  -2   6  -9    1.43    0.82
   2  -6   9    1.12    0.78
  -3   6  -9    5.98    0.93
  -3   6  -9    4.32    0.98
  -4   6  -9    3.06    0.92
  -5   6  -9    4.16    1.45
  -6   6  -9    3.46    1.61
  -7  -5   9    2.55    1.89
  -6  -5   9    8.01    1.86
   5   5  -9   21.37    1.92
  -5  -5   9   20.45    2.12
   4   5  -9   12.55    1.08
   4   5  -9   10.66    1.57
  -4  -5   9    8.45    1.67
   3   5  -9    3.00    1.26
   3   5  -9    1.55    0.78
  -3  -5   9    3.93    1.32
   2   5  -9   39.70    2.18
  -2  -5   9   37.38    2.17
   1   5  -9   27.57    1.96
  -1  -5   9   29.00    1.97
   0   5  -9    1.90    1.02
   0  -5   9    3.53    1.13
  -1   5  -9   25.85    1.74
  -1   5  -9   25.51    1.94
   1  -5   9   23.48    1.61
  -2   5  -9   44.33    1.90
  -2   5  -9   41.70    1.89
   2  -5   9   41.16    1.70
  -3   5  -9    1.58    0.74
  -3   5  -9    3.43    0.87
  -4   5  -9   10.04    1.00
  -4   5  -9    9.53    1.45
  -5   5  -9   21.43    2.05
  -6   5  -9   10.18    1.74
  -7  -4   9    6.08    1.99
  -6  -4   9   21.38    2.21
   5   4  -9   42.63    2.04
   5   4  -9   44.72    2.42
  -5  -4   9   47.94    1.92
  -5  -4   9   49.30    2.73
   4   4  -9   24.75    1.85
  -4  -4   9   22.01    1.27
  -4  -4   9   21.64    1.90
   3   4  -9   22.28    1.83
  -3  -4   9   20.12    1.74
   2   4  -9    8.74    1.31
  -2  -4   9    7.27    1.27
   1   4  -9   66.97    2.61
  -1  -4   9   68.94    2.59
   0   4  -9   45.31    1.33
   0   4  -9   46.99    1.95
   0   4  -9   41.35    2.13
   0  -4   9   44.25    2.05
  -1   4  -9   66.68    2.37
  -1   4  -9   69.78    2.09
  -1   4  -9   70.53    2.62
  -1   4  -9   70.34    2.48
   1  -4   9   69.43    2.32
  -2   4  -9   10.03    0.97
  -2   4  -9    9.04    1.10
  -2   4  -9    7.96    1.02
   2  -4   9    9.93    0.93
  -3   4  -9   22.27    1.72
  -3   4  -9   23.17    1.38
  -3   4  -9   24.21    1.39
  -4   4  -9   23.52    1.28
  -4   4  -9   22.88    1.81
  -4   4  -9   22.86    1.28
  -5   4  -9   43.53    2.54
  -6   4  -9   19.75    2.04
  -7  -3   9    8.14    1.92
  -6  -3   9   13.49    1.93
  -6  -3   9   15.17    1.53
   5   3  -9   12.05    1.54
  -5  -3   9   10.83    1.73
  -5  -3   9   15.06    1.33
   4   3  -9   13.15    1.51
  -4  -3   9   10.11    1.61
  -4  -3   9   13.79    1.08
   3   3  -9   21.82    1.76
  -3  -3   9   23.48    1.91
   2   3  -9   10.74    1.34
  -2  -3   9   10.45    1.40
   1   3  -9   33.40    1.99
  -1  -3   9   33.55    1.98
   0   3  -9   23.90    1.53
   0   3  -9   26.99    1.81
   0   3  -9   24.81    1.01
   0  -3   9   26.52    1.76
  -1   3  -9   30.86    1.67
  -1   3  -9   33.95    1.46
  -1   3  -9   32.44    1.78
  -1   3  -9   32.05    1.86
   1  -3   9   30.33    1.65
  -2   3  -9    9.38    1.05
  -2   3  -9   10.51    1.05
  -2   3  -9   12.00    0.95
   2  -3   9   10.59    0.91
  -3   3  -9   23.90    1.27
  -3   3  -9   23.36    1.34
  -3   3  -9   21.98    1.68
  -4   3  -9   11.67    1.43
  -5   3  -9   15.73    1.71
  -6   3  -9   17.31    1.96
  -7  -2   9    4.81    1.80
  -6  -2   9   -0.75    1.15
  -6  -2   9   -1.13    1.45
   5   2  -9    9.90    1.39
  -5  -2   9    6.73    1.59
  -5  -2   9    7.37    1.22
   4   2  -9   69.70    2.69
  -4  -2   9   69.03    2.24
  -4  -2   9   70.07    2.90
   3   2  -9   50.49    2.20
  -3  -2   9   49.07    2.30
   2   2  -9   27.53    1.87
  -2  -2   9   24.81    1.86
   1   2  -9   46.45    2.17
  -1  -2   9   48.72    2.22
   0   2  -9   40.47    1.98
   0   2  -9   43.37    1.93
   0   2  -9   37.38    1.68
   0  -2   9   42.34    2.01
  -1   2  -9   50.45    1.98
  -1   2  -9   48.68    1.90
  -1   2  -9   44.21    2.18
  -1   2  -9   46.67    1.68
   1  -2   9   45.29    1.86
   1  -2   9   46.85    2.23
  -2   2  -9   27.57    1.43
  -2   2  -9   26.88    1.49
  -2   2  -9   25.25    1.55
   2  -2   9   26.54    1.29
   2  -2   9   29.08    2.12
  -3   2  -9   53.31    2.19
  -3   2  -9   54.90    1.76
  -3   2  -9   50.17    1.76
   3  -2   9   50.92    2.68
  -4   2  -9   72.79    2.77
   4  -2   9   71.70    3.32
  -5   2  -9    8.19    1.46
   5  -2   9    7.72    1.87
  -6   2  -9   -0.07    1.13
  -7  -1   9    1.58    1.63
  -6  -1   9    9.16    1.71
  -6  -1   9    8.87    1.48
   5   1  -9   13.24    1.42
  -5  -1   9   12.27    1.71
   4   1  -9   31.25    1.92
  -4  -1   9   30.84    2.10
   3   1  -9   32.89    1.90
  -3  -1   9   28.11    1.93
   2   1  -9    0.97    1.00
  -2  -1   9    1.59    1.07
   1   1  -9   44.14    2.11
  -1  -1   9   44.76    2.10
   0   1  -9  141.16    3.92
   0   1  -9  155.14    3.88
   0  -1   9  155.86    3.96
   0  -1   9  157.01    3.92
   0  -1   9  156.77    3.33
  -1   1  -9   44.31    1.87
  -1   1  -9   41.97    2.00
  -1   1  -9   41.80    1.60
   1  -1   9   44.09    1.83
   1  -1   9   44.40    1.76
   1  -1   9   40.84    2.14
  -2   1  -9    1.56    0.91
  -2   1  -9    1.93    0.85
  -2   1  -9    1.54    0.70
   2  -1   9    1.17    1.16
   2  -1   9    0.15    0.72
  -3   1  -9   28.76    1.34
  -3   1  -9   28.95    1.75
   3  -1   9   26.85    2.18
  -4   1  -9   30.23    1.96
   4  -1   9   32.59    2.49
  -5   1  -9   13.98    1.56
   5  -1   9   14.15    2.16
  -6   1  -9   12.14    1.59
   6  -1   9    8.96    2.18
  -7   0   9    3.61    1.48
  -7   0   9    4.60    1.70
  -6   0   9    1.50    1.48
   5   0  -9   54.22    2.26
  -5   0   9   48.59    2.55
   4   0  -9  112.22    3.40
  -4   0   9  114.08    3.54
   3   0  -9    4.34    1.10
  -3   0   9    4.91    1.19
   2   0  -9   42.29    2.10
  -2   0   9   48.72    2.14
  -1   0   9   62.13    2.38
   0   0  -9   -0.54    0.77
   0   0   9   -0.91    1.00
   0   0   9    0.99    0.82
  -1   0  -9   57.60    2.30
  -1   0  -9   59.09    2.13
   1   0   9   61.35    2.43
   1   0   9   56.77    2.02
   1   0   9   61.04    2.13
  -2   0  -9   46.04    1.86
  -2   0  -9   44.78    2.35
  -2   0  -9   46.56    1.76
   2   0   9   44.51    2.31
   2   0   9   44.14    1.98
   2   0   9   45.43    1.64
  -3   0  -9    2.73    0.95
  -3   0  -9    4.61    0.71
   3   0   9    4.51    1.41
  -4   0  -9  106.25    3.36
  -4   0  -9  107.65    2.73
   4   0   9  110.74    4.08
  -5   0  -9   48.62    2.39
   5   0   9   50.54    3.09
  -6   0  -9    1.92    1.21
   6   0   9    2.48    1.92
   7   0   9    2.50    2.18
  -7   1   9    4.25    1.60
  -7   1   9    0.39    1.56
  -6   1   9    8.92    1.64
   5  -1  -9   12.58    1.34
  -5   1   9   10.23    1.51
   4  -1  -9   26.21    1.84
  -4   1   9   28.14    1.96
  -4   1   9   29.70    1.69
   3  -1  -9   27.33    1.75
  -3   1   9   32.48    1.87
  -3   1   9   27.32    1.34
  -2   1   9    1.44    1.07
  -1   1   9   51.75    2.23
   0  -1  -9  161.74    4.13
   0   1   9  156.37    4.15
   0   1   9  162.97    4.16
  -1  -1  -9   43.82    1.87
   1   1   9   46.32    1.90
   1   1   9   40.72    1.76
   1   1   9   43.19    2.12
  -2  -1  -9    1.62    0.75
   2   1   9    2.21    1.23
   2   1   9    1.10    0.80
   2   1   9    0.25    0.83
  -3  -1  -9   28.63    1.40
  -3  -1  -9   27.84    1.71
   3   1   9   29.87    2.23
  -4  -1  -9   27.29    1.78
  -4  -1  -9   25.19    1.37
   4   1   9   30.64    2.42
  -5  -1  -9   13.72    1.52
   5   1   9   18.47    2.27
  -6  -1  -9   10.78    1.59
   6   1   9    6.38    2.06
   7   1   9    3.87    2.23
  -7   2   9    5.76    1.64
  -6   2   9   -1.42    1.33
   5  -2  -9    9.31    1.27
  -5   2   9    8.91    1.50
   4  -2  -9   63.49    2.44
  -4   2   9   66.62    2.37
  -4   2   9   63.12    2.59
   3  -2  -9   51.76    2.12
  -3   2   9   48.30    2.22
  -3   2   9   46.75    1.86
  -2   2   9   24.67    1.78
  -1   2   9   46.14    2.08
   0   2   9   38.32    1.90
  -1  -2  -9   47.68    1.98
   1   2   9   47.88    2.28
   1   2   9   46.85    1.89
   1   2   9   47.61    2.02
  -2  -2  -9   27.41    1.49
   2   2   9   26.26    1.52
   2   2   9   25.49    1.74
   2   2   9   23.52    2.01
  -3  -2  -9   49.14    1.87
   3   2   9   49.41    2.67
  -4  -2  -9   72.80    2.60
  -4  -2  -9   68.87    2.26
   4   2   9   72.62    3.30
  -5  -2  -9    8.72    1.38
   5   2   9   11.12    2.06
  -6  -2  -9    0.76    1.29
   6   2   9    1.47    1.86
   7   2   9    6.64    2.36
  -7   3   9    6.61    1.64
  -6   3   9   12.90    1.70
  -5   3   9   12.58    1.58
   4  -3  -9   14.87    1.37
  -4   3   9   13.07    1.51
  -4   3   9   16.15    1.34
  -3   3   9   19.47    1.55
  -2   3   9    7.03    1.21
  -1   3   9   31.97    1.92
   0   3   9   26.19    1.80
  -1  -3  -9   33.55    1.83
   1   3   9   31.47    1.85
  -2  -3  -9    9.90    1.03
   2   3   9    8.35    1.07
   2   3   9    9.66    1.44
   2   3   9   10.48    1.14
  -3  -3  -9   21.86    1.52
   3   3   9   25.38    2.21
   3   3   9   22.04    1.35
  -4  -3  -9   11.29    1.12
   4   3   9   12.29    1.87
   5   3   9    9.95    2.06
   6   3   9   13.57    2.41
   7   3   9    9.45    2.36
  -7   4   9    3.69    1.52
  -6   4   9   17.34    1.77
  -5   4   9   46.76    2.44
   4  -4  -9   22.12    1.59
  -4   4   9   21.10    1.72
  -3   4   9   22.14    1.78
  -2   4   9    7.73    1.29
  -1   4   9   65.35    2.56
   0   4   9   41.50    2.11
   1   4   9   70.15    2.53
  -2  -4  -9    8.46    1.06
   2   4   9    6.20    1.05
   2   4   9    7.01    1.41
   2   4   9    8.74    1.16
  -3  -4  -9   22.58    1.64
   3   4   9   21.25    1.52
   3   4   9   25.19    2.10
   4   4   9   23.16    2.28
   5   4   9   42.13    3.06
   6   4   9   19.63    2.55
   7   4   9    6.55    2.32
  -7   5   9    3.69    1.54
  -6   5   9    7.11    1.53
  -5   5   9   17.39    1.75
  -4   5   9    8.40    1.45
  -3   5   9    3.36    1.21
  -2   5   9   36.61    2.09
  -1   5   9   25.72    1.81
   0   5   9    3.67    1.19
   1   5   9   27.57    1.84
   2   5   9   40.97    2.04
   3   5   9    2.08    1.00
   3   5   9    1.40    1.43
   4   5   9    9.64    1.12
   4   5   9   11.92    2.01
   5   5   9   16.67    2.32
   6   5   9    6.34    2.10
   7   5   9    2.85    2.26
  -6   6   9    2.88    1.46
  -5   6   9    4.61    1.40
  -4   6   9    1.96    1.33
  -3   6   9    4.35    1.31
  -2   6   9    0.10    1.15
  -1   6   9   40.58    2.20
   0   6   9    0.75    1.12
   1   6   9   44.17    2.15
   2   6   9    1.74    1.08
   3   6   9    1.62    1.50
   3   6   9    3.26    1.17
   4   6   9    1.62    1.74
   4   6   9    2.72    1.04
   5   6   9    1.48    1.87
   6   6   9    2.92    2.08
  -6   7   9   10.79    1.73
  -5   7   9    0.69    1.38
  -4   7   9    2.24    1.39
  -3   7   9    4.23    1.35
  -2   7   9   31.27    2.14
  -1   7   9    0.45    1.14
   0   7   9   58.33    2.53
   1   7   9    0.41    1.11
   2   7   9   29.42    1.97
   3   7   9    3.30    1.21
   4   7   9    5.01    1.87
   4   7   9    5.38    1.31
   5   7   9   -0.03    1.80
   6   7   9   11.42    2.42
  -6   8   9    7.29    1.66
  -5   8   9    6.16    1.59
  -4   8   9   13.84    1.75
  -3   8   9    7.24    1.49
  -2   8   9    8.05    1.44
  -1   8   9    5.47    1.39
   0   8   9   40.38    2.28
   1   8   9    2.37    1.23
   2   8   9   10.75    1.61
   3   8   9    4.98    1.36
   4   8   9   15.46    1.68
   4   8   9   13.29    2.22
   5   8   9    3.06    1.94
   6   8   9    3.94    2.29
  -6   9   9    4.89    1.69
  -5   9   9    4.51    1.59
  -4   9   9    1.68    1.45
  -3   9   9   14.64    1.78
  -2   9   9    2.48    1.37
  -1   9   9    1.26    1.34
   0   9   9   84.50    3.23
   1   9   9    2.66    1.31
   2   9   9    0.22    1.29
   3   9   9   16.44    1.85
   4   9   9    2.27    1.81
   5   9   9    1.63    2.02
   6   9   9    4.97    2.33
  -5  10   9   12.44    1.93
  -4  10   9   10.04    1.78
  -3  10   9    0.11    1.42
  -2  10   9    4.78    1.49
  -1  10   9    9.08    1.65
   0  10   9   59.10    2.80
   1  10   9    7.98    1.69
   2  10   9    2.85    1.48
   3  10   9    3.58    1.53
   4  10   9    4.91    2.03
   5  10   9   12.79    2.53
  -5  11   9    4.96    1.81
  -4  11   9    3.07    1.63
  -3  11   9    0.31    1.47
  -2  11   9   15.51    1.94
  -1  11   9   48.33    2.72
   0  11   9    4.14    1.61
   1  11   9   44.68    2.74
   2  11   9   15.41    2.07
   3  11   9    2.12    1.56
   5  11   9    3.14    2.20
  -5  12   9    1.65    1.78
  -4  12   9   17.25    2.16
  -3  12   9   25.21    2.25
  -2  12   9   14.93    1.92
  -1  12   9    3.19    1.66
   0  12   9    9.71    1.85
   1  12   9    6.45    1.83
   2  12   9   20.30    2.26
   3  12   9   32.70    2.65
   5  12   9    1.45    2.20
  -4  13   9    6.11    1.88
  -3  13   9    2.04    1.63
  -2  13   9    3.98    1.73
  -1  13   9   -0.50    1.56
   0  13   9    4.66    1.79
   1  13   9    2.98    1.88
   2  13   9    3.19    1.82
   3  13   9    2.67    1.78
  -4  14   9   19.08    2.36
  -3  14   9    1.70    1.66
  -1  14   9    2.40    1.77
   0  14   9    6.37    1.91
   1  14   9    2.65    1.91
   2  14   9   18.66    2.45
   3  14   9    1.29    1.87
  -3  15   9    4.30    1.82
  -2  15   9   -0.92    1.67
  -1  15   9    9.41    2.08
   0  15   9    0.20    1.88
   1  15   9   11.76    2.35
   2  15   9    3.33    2.00
   3  15   9    3.00    2.10
  -2  16   9    2.13    1.84
  -1  16   9   -1.43    1.77
   0  16   9    5.29    2.11
   1  16   9    1.04    2.10
   2  16   9    1.54    2.07
   1  16 -10    4.96    2.11
   0  16 -10    0.13    1.76
  -1  16 -10    2.99    1.83
   3  15 -10    3.22    2.16
  -3 -15  10   -1.14    1.90
   2  15 -10    5.19    2.13
   1  15 -10    2.76    1.93
   0  15 -10    2.01    1.77
  -1  15 -10   -0.73    1.60
  -2  15 -10    2.72    1.74
   3  14 -10   31.36    2.90
  -3 -14  10   31.86    2.89
   2  14 -10    6.02    2.04
  -2 -14  10    1.11    1.85
   1  14 -10    1.80    1.77
  -1 -14  10    1.32    1.81
   0  14 -10    1.02    1.63
  -1  14 -10   -0.15    1.53
  -2  14 -10    5.29    1.72
  -3  14 -10   32.15    2.63
   4  13 -10   -0.64    1.91
  -4 -13  10   -1.71    1.82
   3  13 -10   14.38    2.31
  -3 -13  10   12.24    2.20
   2  13 -10   13.03    2.20
  -2 -13  10   14.60    2.21
   1  13 -10   10.96    1.97
  -1 -13  10   12.86    2.06
   0  13 -10   36.55    2.74
  -1  13 -10   12.89    1.94
  -2  13 -10   12.12    1.86
  -3  13 -10   15.79    1.91
  -4  13 -10   -0.66    1.36
  -5 -12  10   -0.96    1.79
   4  12 -10    2.13    1.96
  -4 -12  10    3.46    1.93
   3  12 -10    5.99    1.93
  -3 -12  10    7.15    1.97
   2  12 -10    4.34    1.82
  -2 -12  10    7.21    1.89
   1  12 -10    5.72    1.73
  -1 -12  10    9.73    1.88
   0  12 -10    6.00    1.71
   0 -12  10    8.63    1.76
  -1  12 -10    9.90    1.74
  -2  12 -10    4.91    1.52
  -3  12 -10    5.46    1.48
  -4  12 -10    5.61    1.47
  -5  12 -10    0.34    1.28
  -5 -11  10    5.83    2.00
   4  11 -10    3.22    1.89
  -4 -11  10    2.51    1.79
   3  11 -10    6.67    1.92
  -3 -11  10    8.50    1.88
   2  11 -10    0.97    1.63
  -2 -11  10    0.73    1.59
   1  11 -10   27.28    2.35
  -1 -11  10   30.91    2.48
   0  11 -10   15.28    1.90
   0 -11  10   19.16    1.99
  -1  11 -10   30.37    2.38
  -2  11 -10   -1.12    1.28
  -3  11 -10    8.62    1.53
  -4  11 -10    4.26    1.35
  -5  11 -10    5.14    1.37
   5  10 -10   10.00    2.12
  -5 -10  10   11.79    2.13
   4  10 -10    8.58    1.95
  -4 -10  10    6.41    1.90
   3  10 -10    9.67    1.91
  -3 -10  10    6.07    1.81
   2  10 -10   62.95    3.13
  -2 -10  10   60.05    2.99
   1  10 -10    2.83    1.51
  -1 -10  10    2.78    1.55
   0  10 -10   56.83    2.84
   0 -10  10   54.68    2.74
  -1  10 -10   -0.17    1.29
   1 -10  10    0.56    1.25
  -2  10 -10   67.42    2.93
  -3  10 -10    8.65    1.48
  -4  10 -10    8.00    1.40
  -5  10 -10   15.10    1.54
  -6  -9  10   -0.20    1.88
   5   9 -10    9.80    2.04
  -5  -9  10    8.19    1.94
   4   9 -10    3.42    1.76
  -4  -9  10    4.45    1.72
   3   9 -10    3.59    1.63
  -3  -9  10    4.32    1.61
   2   9 -10   29.86    2.32
  -2  -9  10   29.71    2.33
   1   9 -10   46.40    2.65
  -1  -9  10   48.40    2.62
   0   9 -10   26.08    2.06
   0  -9  10   24.97    1.99
  -1   9 -10   45.96    2.48
   1  -9  10   47.37    2.34
  -2   9 -10   30.37    2.14
  -3   9 -10    3.37    1.25
  -4   9 -10    5.13    1.24
  -5   9 -10   10.12    1.33
  -6  -8  10    8.85    2.06
   5   8 -10   10.61    1.92
  -5  -8  10    8.84    1.92
   4   8 -10    3.15    1.13
   4   8 -10    1.81    1.59
  -4  -8  10    0.83    1.58
   3   8 -10    7.01    1.69
  -3  -8  10    5.79    1.70
   2   8 -10    8.45    1.65
  -2  -8  10   10.10    1.75
   1   8 -10   24.17    1.98
  -1  -8  10   26.19    2.01
   0   8 -10   18.18    1.72
   0  -8  10   18.98    1.74
  -1   8 -10   25.09    1.88
   1  -8  10   25.74    1.83
  -2   8 -10    7.69    1.35
   2  -8  10    8.94    1.18
  -3   8 -10    6.50    1.25
  -4   8 -10    0.13    1.01
  -5   8 -10    7.84    1.16
  -6  -7  10    1.81    1.83
   5   7 -10    2.42    1.57
  -5  -7  10    2.75    1.73
   4   7 -10   16.32    1.28
   4   7 -10   11.31    1.80
  -4  -7  10   11.78    1.85
   3   7 -10   12.62    1.78
  -3  -7  10   14.06    1.76
   2   7 -10    6.15    1.45
  -2  -7  10    3.75    1.44
   1   7 -10   64.34    2.77
  -1  -7  10   66.13    2.77
   0   7 -10   40.09    2.20
   0  -7  10   42.75    2.17
  -1   7 -10   62.68    2.59
   1  -7  10   66.53    2.51
  -2   7 -10    3.07    1.11
   2  -7  10    4.63    0.99
  -3   7 -10   15.89    1.40
  -4   7 -10   16.17    1.36
  -5   7 -10    0.76    1.38
  -5   7 -10    1.30    0.92
  -6   7 -10    1.08    1.54
  -6  -6  10   20.25    2.30
   5   6 -10   13.18    1.84
  -5  -6  10   12.24    1.92
   4   6 -10   34.47    2.36
  -4  -6  10   38.12    2.51
   3   6 -10   15.54    1.71
  -3  -6  10   13.28    1.71
   2   6 -10   14.82    1.59
  -2  -6  10   11.26    1.58
   1   6 -10   15.30    1.56
  -1  -6  10   12.17    1.54
   0   6 -10    9.10    1.33
   0  -6  10    9.53    1.38
  -1   6 -10   19.32    1.55
   1  -6  10   16.27    1.41
  -2   6 -10   14.66    1.36
   2  -6  10   13.53    1.17
  -3   6 -10   18.65    1.33
  -3   6 -10   19.55    1.41
  -4   6 -10   34.24    1.77
  -5   6 -10   14.24    1.91
  -6   6 -10   24.82    2.32
  -7  -5  10   35.80    2.97
  -6  -5  10    2.70    1.73
   5   5 -10   19.36    1.91
  -5  -5  10   15.81    2.02
   4   5 -10   40.77    2.37
  -4  -5  10   41.42    2.54
   3   5 -10   21.45    1.76
  -3  -5  10   20.41    1.84
   2   5 -10   18.14    1.66
  -2  -5  10   20.35    1.72
   1   5 -10   81.55    2.86
  -1  -5  10   78.16    2.83
   0   5 -10    5.42    0.59
   0   5 -10    7.72    1.21
   0   5 -10    6.16    0.93
   0  -5  10    6.29    1.27
  -1   5 -10   79.06    2.93
  -1   5 -10   84.41    2.76
   1  -5  10   79.82    2.63
  -2   5 -10   18.91    1.57
  -2   5 -10   20.24    1.33
   2  -5  10   19.18    1.36
  -3   5 -10   20.07    1.59
  -3   5 -10   21.01    1.51
  -3   5 -10   21.79    1.51
  -4   5 -10   40.09    1.74
  -4   5 -10   38.34    2.33
  -5   5 -10   20.64    1.96
  -6   5 -10    4.09    1.54
  -7  -4  10    4.45    1.97
  -6  -4  10    6.46    1.81
   5   4 -10   11.51    1.69
  -5  -4  10   10.86    1.14
  -5  -4  10   10.71    1.83
   4   4 -10   50.00    2.48
  -4  -4  10   48.30    2.67
   3   4 -10   41.66    2.32
  -3  -4  10   47.50    2.42
   2   4 -10   12.44    1.42
  -2  -4  10   16.32    1.60
   1   4 -10    8.80    0.75
   1   4 -10    9.08    1.31
  -1  -4  10    8.91    1.35
   0   4 -10    1.18    1.01
   0   4 -10   -0.10    0.65
   0   4 -10    0.43    0.46
   0  -4  10    0.27    1.05
  -1   4 -10    7.95    1.14
  -1   4 -10    8.42    1.13
  -1   4 -10    9.98    1.09
  -1   4 -10    8.94    0.86
   1  -4  10   10.11    1.17
  -2   4 -10   17.97    1.33
  -2   4 -10   16.63    1.23
  -2   4 -10   16.05    1.18
   2  -4  10   15.67    1.11
  -3   4 -10   44.61    1.83
  -3   4 -10   44.93    2.12
  -3   4 -10   45.59    1.78
  -4   4 -10   47.26    1.78
  -4   4 -10   45.81    2.39
  -5   4 -10   11.14    1.64
  -6   4 -10    7.35    1.63
  -7  -3  10    8.66    2.06
  -6  -3  10    7.32    1.80
   5   3 -10   25.76    2.09
  -5  -3  10   25.39    1.65
  -5  -3  10   24.53    2.15
   4   3 -10    8.77    1.49
  -4  -3  10    8.96    1.63
  -4  -3  10    9.68    0.97
   3   3 -10   31.00    1.99
  -3  -3  10   33.05    2.14
   2   3 -10   77.92    2.82
  -2  -3  10   77.74    2.87
   1   3 -10   66.22    2.60
  -1  -3  10   71.17    2.64
   0   3 -10    0.65    0.96
   0   3 -10    0.68    0.83
   0  -3  10   -0.17    1.07
  -1   3 -10   71.19    2.63
  -1   3 -10   72.94    2.43
  -1   3 -10   72.35    2.49
  -1   3 -10   73.70    2.10
   1  -3  10   70.05    2.38
  -2   3 -10   81.60    2.46
  -2   3 -10   83.80    2.50
  -2   3 -10   79.38    2.52
   2  -3  10   80.92    2.33
  -3   3 -10   33.30    1.57
  -3   3 -10   34.54    1.86
  -3   3 -10   33.35    1.53
  -4   3 -10    9.20    1.37
  -4   3 -10    9.01    0.89
  -4   3 -10   11.00    0.89
  -5   3 -10   25.49    2.05
  -6   3 -10    2.64    1.46
  -7  -2  10   -0.48    1.68
  -6  -2  10    8.48    1.45
  -6  -2  10    8.98    1.81
   5   2 -10   21.39    1.75
  -5  -2  10   20.86    2.00
  -5  -2  10   21.46    1.54
   4   2 -10   94.19    3.23
  -4  -2  10   94.35    3.43
  -4  -2  10   99.75    2.69
   3   2 -10   86.06    3.05
  -3  -2  10   90.62    3.13
   2   2 -10   14.22    1.43
  -2  -2  10   19.28    1.62
   1   2 -10   10.80    1.31
  -1  -2  10   11.55    1.43
   0   2 -10   65.22    2.40
   0   2 -10   59.74    2.09
   0  -2  10   60.99    2.35
  -1   2 -10   13.68    1.13
  -1   2 -10   15.83    1.29
  -1   2 -10   12.95    0.97
  -1   2 -10   14.03    1.23
   1  -2  10   13.57    1.25
   1  -2  10   12.04    1.35
  -2   2 -10   18.68    1.43
  -2   2 -10   18.89    1.27
  -2   2 -10   20.27    1.21
   2  -2  10   21.16    1.77
   2  -2  10   17.41    1.25
  -3   2 -10   88.69    2.49
  -3   2 -10   86.87    2.83
  -3   2 -10   87.52    2.48
   3  -2  10   83.30    3.39
  -4   2 -10   96.22    2.58
  -4   2 -10   99.10    2.58
  -4   2 -10  102.42    3.32
   4  -2  10   93.56    3.86
  -5   2 -10   22.88    1.96
   5  -2  10   23.85    2.59
  -6   2 -10    9.54    1.64
  -7  -1  10    4.76    1.77
  -6  -1  10    2.56    1.26
  -6  -1  10    0.15    1.51
   5   1 -10    0.32    1.14
  -5  -1  10    1.47    1.47
   4   1 -10    5.17    1.29
  -4  -1  10    5.13    1.42
   3   1 -10    0.14    1.04
  -3  -1  10   -0.60    1.09
   2   1 -10  101.09    3.10
  -2  -1  10   98.60    3.16
   1   1 -10   11.45    1.30
  -1  -1  10   11.88    1.37
   0   1 -10   14.98    0.99
   0  -1  10   11.79    1.06
   0  -1  10   13.08    0.87
   0  -1  10   13.80    1.36
  -1   1 -10   16.35    1.27
  -1   1 -10   13.92    1.14
   1  -1  10   13.61    1.09
   1  -1  10   14.54    1.26
   1  -1  10   13.55    1.38
  -2   1 -10  107.34    2.92
  -2   1 -10  105.53    2.93
   2  -1  10  103.69    2.78
   2  -1  10  107.71    3.57
  -3   1 -10    1.13    0.91
  -3   1 -10   -0.01    0.62
   3  -1  10   -2.67    1.21
  -4   1 -10    5.35    1.19
  -4   1 -10    6.70    0.77
   4  -1  10    9.02    1.74
  -5   1 -10    0.23    1.13
   5  -1  10    3.02    1.84
  -6   1 -10    0.67    1.18
   6  -1  10    2.70    1.94
  -7   0  10   -0.03    1.61
  -6   0  10    7.21    1.67
   5   0 -10   22.14    1.86
  -5   0  10   20.92    1.91
   4   0 -10   34.81    2.05
  -4   0  10   34.20    2.16
   3   0 -10   98.86    3.12
  -3   0  10  102.75    3.29
   2   0 -10  105.89    3.21
  -2   0  10  105.55    3.28
  -1   0  10   28.96    1.87
   0   0  10   12.22    1.11
   0   0  10   13.08    1.33
  -1   0 -10   29.49    1.70
   1   0  10   27.16    1.89
   1   0  10   27.88    1.59
   1   0  10   27.34    1.63
  -2   0 -10  112.88    3.03
  -2   0 -10  110.81    2.99
   2   0  10  110.76    3.63
   2   0  10  106.51    2.89
   2   0  10  110.35    3.13
  -3   0 -10  101.15    3.07
  -3   0 -10  105.24    2.79
   3   0  10  101.14    3.77
  -4   0 -10   32.32    1.45
  -4   0 -10   34.65    2.03
   4   0  10   34.04    2.60
  -5   0 -10   22.25    1.87
   5   0  10   22.84    2.47
  -6   0 -10    6.92    1.39
   6   0  10    3.13    1.92
   7   0  10    1.57    2.19
  -7   1  10    5.24    1.72
  -6   1  10    3.80    1.52
   5  -1 -10    0.02    1.03
  -5   1  10    1.68    1.35
   4  -1 -10    5.50    1.24
  -4   1  10    5.76    1.39
  -4   1  10    4.39    0.92
   3  -1 -10    1.28    1.02
  -3   1  10    0.61    1.15
  -2   1  10  107.98    3.32
  -1   1  10   11.54    1.39
   0   1  10   12.31    1.17
   0   1  10   13.02    1.38
  -1  -1 -10   12.18    1.12
   1   1  10   11.86    1.25
   1   1  10   15.63    1.44
   1   1  10   11.69    1.07
  -2  -1 -10  106.08    2.93
   2   1  10  102.58    2.82
   2   1  10  105.47    3.01
   2   1  10   99.90    3.52
  -3  -1 -10    0.86    0.68
  -3  -1 -10   -0.76    0.84
   3   1  10    0.50    1.28
  -4  -1 -10    6.27    0.85
  -4  -1 -10    6.19    1.21
   4   1  10    6.45    1.76
  -5  -1 -10    2.91    1.07
   5   1  10    1.14    1.76
  -6  -1 -10    1.48    1.18
   6   1  10    3.21    1.92
   7   1  10    3.02    2.24
  -7   2  10    0.96    1.57
  -6   2  10    5.01    1.53
   5  -2 -10   20.53    1.60
  -5   2  10   18.04    1.78
   4  -2 -10   90.25    3.06
  -4   2  10   95.35    3.25
  -4   2  10   95.15    2.90
   3  -2 -10   82.32    2.80
  -3   2  10   83.74    2.93
  -3   2  10   83.22    2.49
  -2   2  10   16.82    1.50
  -1   2  10   11.92    1.34
   0   2  10   60.17    2.38
  -1  -2 -10   13.04    1.16
   1   2  10   13.81    1.45
   1   2  10   11.38    1.24
   1   2  10   10.73    1.06
  -2  -2 -10   18.11    1.21
   2   2  10   16.42    1.32
   2   2  10   16.52    1.24
   2   2  10   17.43    1.66
  -3  -2 -10   83.08    2.52
   3   2  10   83.29    3.35
   3   2  10   78.86    2.28
  -4  -2 -10   93.22    2.74
   4   2  10   92.14    3.83
  -5  -2 -10   20.74    1.73
   5   2  10   22.55    2.46
  -6  -2 -10    6.97    1.46
   6   2  10    7.98    2.16
   7   2  10    6.15    2.37
  -7   3  10    9.52    1.80
  -6   3  10    2.04    1.41
  -5   3  10   25.48    2.05
   4  -3 -10   10.28    1.34
  -4   3  10    9.56    1.15
  -4   3  10   10.91    1.53
  -3   3  10   30.85    2.01
  -2   3  10   77.17    2.76
  -1   3  10   67.86    2.56
   0   3  10   -0.24    1.08
   1   3  10   71.37    2.54
  -2  -3 -10   76.74    2.51
   2   3  10   81.91    3.10
   2   3  10   73.44    2.58
   2   3  10   74.53    2.49
  -3  -3 -10   29.29    1.67
   3   3  10   29.82    2.34
   3   3  10   28.73    1.54
   4   3  10    8.00    1.81
   5   3  10   21.51    2.45
   6   3  10    1.60    1.93
   7   3  10    8.54    2.35
  -7   4  10    2.64    1.53
  -6   4  10    4.71    1.50
  -5   4  10    9.33    1.60
   4  -4 -10   47.51    2.26
  -4   4  10   47.28    2.45
  -3   4  10   43.37    2.26
  -2   4  10   15.33    1.52
  -1   4  10    7.37    1.28
   0   4  10    0.01    1.04
   1   4  10    7.37    1.25
   2   4  10   12.01    1.58
   2   4  10   12.89    1.34
  -3  -4 -10   47.27    2.09
   3   4  10   42.09    1.91
   3   4  10   45.50    2.67
   4   4  10   43.98    2.96
   5   4  10   13.07    2.23
   6   4  10    5.73    2.14
   7   4  10    1.81    2.25
  -7   5  10   31.18    2.42
  -6   5  10    3.27    1.51
  -5   5  10   17.42    1.82
  -4   5  10   36.56    2.28
  -3   5  10   20.22    1.75
  -2   5  10   16.70    1.62
  -1   5  10   75.67    2.80
   0   5  10    6.03    1.29
   1   5  10   76.31    2.75
   2   5  10   19.01    1.53
   3   5  10   20.93    2.08
   3   5  10   18.91    1.52
   4   5  10   38.52    2.81
   5   5  10   17.36    2.39
   6   5  10    2.18    1.97
   7   5  10   31.40    3.31
  -6   6  10   14.02    1.84
  -5   6  10    9.80    1.59
  -4   6  10   31.59    2.25
  -3   6  10   13.87    1.65
  -2   6  10    9.78    1.43
  -1   6  10   15.88    1.58
   0   6  10    4.83    1.25
   1   6  10   15.55    1.57
   2   6  10   12.17    1.49
   3   6  10   16.40    2.01
   3   6  10   14.44    1.51
   4   6  10   33.18    2.77
   4   6  10   32.01    1.89
   5   6  10    9.37    2.16
   6   6  10   23.41    2.78
  -6   7  10    2.63    1.58
  -5   7  10    2.53    1.46
  -4   7  10   12.43    1.73
  -3   7  10    7.91    1.54
  -2   7  10    3.49    1.32
  -1   7  10   65.12    2.79
   0   7  10   39.89    2.26
   1   7  10   64.41    2.68
   2   7  10    2.51    1.23
   3   7  10   13.59    1.64
   3   7  10   10.58    1.96
   4   7  10    9.95    2.07
   5   7  10    1.95    1.89
   6   7  10    2.97    2.16
  -6   8  10    6.26    1.71
  -5   8  10    4.49    1.55
  -4   8  10    0.64    1.41
  -3   8  10    3.42    1.47
  -2   8  10    7.11    1.53
  -1   8  10   17.48    1.72
   0   8  10   13.62    1.66
   1   8  10   19.91    1.85
   2   8  10    9.37    1.57
   3   8  10    7.57    1.58
   4   8  10   -1.94    1.70
   5   8  10    7.64    2.23
   6   8  10    7.83    2.37
  -6   9  10   -0.15    1.55
  -4   9  10    4.07    1.57
  -3   9  10    1.20    1.45
  -2   9  10   21.88    1.99
  -1   9  10   43.99    2.53
   0   9  10   19.66    1.92
   1   9  10   44.58    2.53
   2   9  10   27.10    2.25
   3   9  10    0.68    1.37
   4   9  10    2.92    1.89
   5   9  10    8.79    2.28
   6   9  10   -0.81    2.16
  -5  10  10    9.72    1.91
  -4  10  10    9.63    1.80
  -3  10  10    7.38    1.69
  -1  10  10    0.44    1.44
   0  10  10   50.61    2.76
   1  10  10    1.96    1.44
   2  10  10   61.24    2.95
   3  10  10    4.62    1.60
   4  10  10    4.88    2.06
   5  10  10    5.96    2.30
  -5  11  10    5.23    1.83
  -4  11  10    3.79    1.64
  -3  11  10    2.80    1.60
  -2  11  10    0.14    1.47
  -1  11  10   20.69    2.10
   0  11  10   10.62    1.86
   1  11  10   27.64    2.31
   2  11  10   -0.58    1.48
   3  11  10    4.75    1.68
   4  11  10    3.33    2.09
   5  11  10    3.86    2.26
  -5  12  10    0.61    1.73
  -4  12  10    5.01    1.80
  -3  12  10    1.14    1.63
  -2  12  10    3.75    1.65
  -1  12  10    4.62    1.73
   0  12  10    4.03    1.73
   1  12  10    9.30    1.94
   2  12  10    0.56    1.64
   3  12  10    3.02    1.71
   5  12  10   -0.84    2.22
  -4  13  10   -2.91    1.62
  -3  13  10   11.04    1.96
  -2  13  10    9.77    1.87
  -1  13  10   10.81    2.02
   0  13  10   23.87    2.37
   1  13  10    7.02    1.97
   2  13  10   14.23    2.23
   3  13  10    7.11    1.98
  -3  14  10   19.57    2.34
  -2  14  10    3.36    1.72
  -1  14  10    0.58    1.73
   0  14  10    0.41    1.81
   1  14  10    0.79    1.84
   2  14  10    6.25    1.94
   3  14  10   28.66    2.80
  -3  15  10    1.68    1.69
  -2  15  10   -0.37    1.71
  -1  15  10   -1.95    1.73
   0  15  10    0.58    1.88
   1  15  10    1.38    2.01
   2  15  10    1.50    1.90
  -1  16  10    5.70    2.04
   0  16  10   -2.04    1.86
   1  16  10    6.68    2.28
   1  16 -11    6.27    2.13
   0  16 -11    3.49    1.97
  -1  16 -11    4.44    1.87
   2  15 -11    0.32    2.05
  -2 -15  11    4.85    2.05
   1  15 -11   -1.08    1.78
   0  15 -11   28.80    2.72
  -1  15 -11   -1.45    1.61
  -2  15 -11    1.17    1.66
   3  14 -11    7.92    2.24
  -3 -14  11   11.35    2.30
   2  14 -11    5.26    2.04
  -2 -14  11    6.82    2.09
   1  14 -11   11.57    2.15
  -1 -14  11    9.39    2.10
   0  14 -11    9.45    2.06
  -1  14 -11   11.31    1.98
  -2  14 -11    4.64    1.73
  -3  14 -11    7.48    1.76
   4  13 -11   15.11    2.50
  -4 -13  11   16.46    2.41
   3  13 -11    2.75    1.93
  -3 -13  11    5.37    2.01
   2  13 -11    2.53    1.85
  -2 -13  11    2.68    1.85
   1  13 -11   10.78    2.08
  -1 -13  11   15.08    2.19
   0  13 -11   27.33    2.51
   0 -13  11   33.46    2.57
  -1  13 -11   12.71    1.97
  -2  13 -11    3.28    1.55
  -3  13 -11    5.39    1.57
  -4  13 -11   17.21    1.94
   4  12 -11   -2.83    1.80
  -4 -12  11    0.60    1.76
   3  12 -11    0.20    1.87
  -3 -12  11   -0.50    1.72
   2  12 -11    3.48    1.86
  -2 -12  11    3.14    1.84
   1  12 -11   -0.18    1.65
  -1 -12  11    2.81    1.65
   0  12 -11    1.90    1.59
   0 -12  11   -1.39    1.47
  -1  12 -11    1.96    1.48
  -2  12 -11    0.52    1.40
  -3  12 -11   -0.90    1.30
  -4  12 -11   -1.30    1.27
  -5 -11  11    1.37    1.86
   4  11 -11    9.41    2.14
  -4 -11  11    6.28    1.90
   3  11 -11   10.55    2.08
  -3 -11  11    7.39    1.96
   2  11 -11   11.13    2.04
  -2 -11  11    9.42    1.92
   1  11 -11   27.45    2.39
  -1 -11  11   32.61    2.52
   0  11 -11   17.11    1.99
   0 -11  11   17.36    1.94
  -1  11 -11   25.82    2.26
   1 -11  11   31.72    2.30
  -2  11 -11   10.30    1.67
  -3  11 -11   12.44    1.67
  -4  11 -11    9.98    1.57
  -5  11 -11    0.77    1.20
   5  10 -11    2.50    1.92
  -5 -10  11    4.40    1.96
   4  10 -11    6.22    1.97
  -4 -10  11    5.09    1.86
   3  10 -11   -0.52    1.70
  -3 -10  11    1.13    1.70
   2  10 -11   33.76    2.58
  -2 -10  11   32.20    2.48
   1  10 -11   17.78    2.02
  -1 -10  11   19.14    2.07
   0  10 -11    1.61    1.40
   0 -10  11    1.76    1.41
  -1  10 -11   20.55    1.95
   1 -10  11   23.98    1.93
  -2  10 -11   35.43    2.42
  -3  10 -11   -0.11    1.18
  -4  10 -11    5.58    1.37
  -5  10 -11    2.87    1.23
  -6  -9  11    1.45    1.92
   5   9 -11    1.06    1.69
  -5  -9  11    1.01    1.72
   4   9 -11    2.20    1.74
  -4  -9  11    3.87    1.79
   3   9 -11    5.04    1.71
  -3  -9  11    9.07    1.84
   2   9 -11   33.01    2.50
  -2  -9  11   34.71    2.49
   1   9 -11   10.48    1.70
  -1  -9  11   12.20    1.78
   0   9 -11  213.96    5.87
   0  -9  11  207.88    5.69
  -1   9 -11    9.76    1.56
   1  -9  11    9.43    1.47
  -2   9 -11   32.10    2.20
  -3   9 -11    5.59    1.30
  -4   9 -11    2.91    1.19
  -5   9 -11    0.46    1.09
  -6  -8  11   -0.30    1.86
   5   8 -11    1.01    1.65
  -5  -8  11    3.37    1.85
   4   8 -11    3.08    1.70
  -4  -8  11    1.78    1.68
   3   8 -11   -0.88    1.48
  -3  -8  11    2.60    1.61
   2   8 -11   60.79    2.93
  -2  -8  11   60.51    2.94
   1   8 -11   38.57    2.36
  -1  -8  11   37.92    2.42
   0   8 -11   60.81    2.73
   0  -8  11   59.57    2.70
  -1   8 -11   37.19    2.22
   1  -8  11   33.72    2.09
  -2   8 -11   53.47    2.47
   2  -8  11   51.19    2.23
  -3   8 -11    1.69    1.12
  -4   8 -11    4.54    1.18
  -5   8 -11    4.92    1.57
  -5   8 -11    4.16    1.11
  -6  -7  11    1.32    1.81
   5   7 -11   -0.77    1.51
  -5  -7  11    4.98    1.78
   4   7 -11    3.95    1.61
  -4  -7  11    2.84    1.62
   3   7 -11   13.25    1.79
  -3  -7  11    8.75    1.71
   2   7 -11   -0.05    1.34
  -2  -7  11    0.18    1.41
   1   7 -11    0.11    1.22
  -1  -7  11    2.44    1.36
   0   7 -11   71.20    2.84
   0  -7  11   73.70    2.84
  -1   7 -11    2.47    1.16
   1  -7  11    0.68    1.08
  -2   7 -11    1.79    1.06
   2  -7  11    0.02    0.89
  -3   7 -11   13.96    1.40
  -4   7 -11    2.59    1.03
  -5   7 -11   -1.21    1.37
  -5   7 -11   -0.26    0.90
  -6  -6  11   -0.42    1.74
   5   6 -11    0.60    1.45
  -5  -6  11    0.96    1.65
   4   6 -11    2.24    1.47
  -4  -6  11    0.47    1.49
   3   6 -11   12.40    1.72
  -3  -6  11   14.76    1.82
   2   6 -11   15.33    1.66
  -2  -6  11   12.54    1.66
   1   6 -11  127.03    3.89
  -1  -6  11  119.69    3.83
   0   6 -11   53.28    1.55
   0   6 -11   54.22    2.30
   0   6 -11   53.93    2.46
   0  -6  11   57.86    2.43
  -1   6 -11  122.87    3.65
   1  -6  11  114.41    3.46
  -2   6 -11   15.16    1.42
   2  -6  11   14.96    1.26
  -3   6 -11   11.62    1.24
  -3   6 -11   11.93    1.36
  -4   6 -11    1.98    0.95
  -4   6 -11    2.14    1.24
  -5   6 -11   -0.07    1.32
  -5   6 -11    1.90    0.87
  -6   6 -11    0.26    1.38
  -6  -5  11   -0.02    1.71
   5   5 -11    2.14    1.46
  -5  -5  11    0.39    1.60
   4   5 -11    3.96    1.50
  -4  -5  11    4.10    1.60
   3   5 -11   15.23    1.70
  -3  -5  11   16.89    1.86
   2   5 -11    4.45    1.33
  -2  -5  11    5.13    1.43
   1   5 -11    5.60    1.26
  -1  -5  11    6.28    1.33
   0   5 -11  121.60    3.64
   0   5 -11  119.71    3.53
   0   5 -11  120.77    2.66
   0  -5  11  120.32    3.63
  -1   5 -11    8.12    1.23
  -1   5 -11    6.87    0.84
   1  -5  11    6.53    1.17
  -2   5 -11    4.49    0.95
  -2   5 -11    2.79    0.88
  -2   5 -11    3.42    1.01
   2  -5  11    3.33    0.91
  -3   5 -11   15.28    1.20
  -3   5 -11   13.40    1.41
  -3   5 -11   17.37    1.32
  -4   5 -11    7.85    1.40
  -4   5 -11    5.96    0.96
  -5   5 -11    3.11    1.44
  -6   5 -11    3.67    1.56
  -7  -4  11    3.62    1.96
  -6  -4  11    7.34    1.82
   5   4 -11    8.73    1.60
  -5  -4  11    4.10    1.67
   4   4 -11    2.14    1.31
  -4  -4  11    2.79    1.47
   3   4 -11   21.88    1.82
  -3  -4  11   20.05    1.88
   2   4 -11    3.44    1.21
  -2  -4  11    1.23    1.30
   1   4 -11   78.48    2.87
   1   4 -11   80.11    2.29
  -1  -4  11   82.95    2.89
   0   4 -11    3.08    0.94
   0   4 -11    0.84    0.97
   0  -4  11    0.41    1.08
  -1   4 -11   82.28    2.91
  -1   4 -11   84.96    2.33
  -1   4 -11   83.55    2.77
   1  -4  11   81.26    2.71
  -2   4 -11    4.77    1.02
  -2   4 -11    5.04    0.87
  -2   4 -11    4.68    0.92
   2  -4  11    4.62    0.91
  -3   4 -11   19.66    1.53
  -3   4 -11   19.23    1.51
  -3   4 -11   17.18    1.40
  -4   4 -11    4.47    1.24
  -4   4 -11    1.86    0.83
  -5   4 -11    7.48    1.49
  -6   4 -11    6.42    1.68
  -7  -3  11    0.34    1.81
  -6  -3  11    6.27    1.82
   5   3 -11   16.59    1.78
  -5  -3  11   16.16    1.30
  -5  -3  11   13.09    1.90
   4   3 -11   26.50    2.11
  -4  -3  11   26.11    1.37
  -4  -3  11   27.19    2.28
   3   3 -11   13.25    1.52
  -3  -3  11   17.20    1.76
   2   3 -11   34.59    2.08
  -2  -3  11   34.59    2.14
   1   3 -11   -0.36    1.03
  -1  -3  11    1.87    1.21
   0   3 -11   61.37    2.11
   0   3 -11   57.19    2.38
   0  -3  11   58.24    2.35
  -1   3 -11    1.49    0.67
  -1   3 -11    1.30    1.03
  -1   3 -11    1.71    0.97
   1  -3  11    0.93    0.97
  -2   3 -11   36.23    1.79
  -2   3 -11   35.15    1.73
  -2   3 -11   35.87    1.72
   2  -3  11   33.85    1.60
  -3   3 -11   16.70    1.20
  -3   3 -11   12.38    1.31
  -3   3 -11   14.73    1.09
  -4   3 -11   25.77    1.88
  -4   3 -11   24.21    1.45
  -5   3 -11   19.14    1.88
  -6   3 -11    6.08    1.59
  -7  -2  11    2.38    1.82
  -6  -2  11    1.30    1.64
   5   2 -11    7.91    1.50
  -5  -2  11    6.20    1.16
  -5  -2  11    5.21    1.65
   4   2 -11    5.35    1.36
  -4  -2  11    4.76    1.51
   3   2 -11    3.96    1.29
  -3  -2  11    3.02    1.29
   2   2 -11   59.20    2.49
  -2  -2  11   59.22    2.57
   1   2 -11   20.34    1.56
  -1  -2  11   20.55    1.64
   0   2 -11    5.40    1.09
   0   2 -11    7.65    0.82
   0  -2  11    6.80    1.28
  -1   2 -11   21.89    1.48
  -1   2 -11   22.55    1.70
  -1   2 -11   20.79    1.27
  -1   2 -11   23.68    1.58
   1  -2  11   20.78    1.57
   1  -2  11   19.97    1.80
  -2   2 -11   55.47    2.10
  -2   2 -11   56.62    2.09
  -2   2 -11   58.77    2.11
   2  -2  11   52.64    1.94
   2  -2  11   58.49    2.66
  -3   2 -11    2.84    0.98
  -3   2 -11    3.97    0.87
  -3   2 -11    4.51    0.81
   3  -2  11    5.63    1.56
  -4   2 -11    5.17    1.24
  -4   2 -11    4.10    0.80
   4  -2  11    6.06    1.86
  -5   2 -11    6.20    1.43
   5  -2  11    9.82    2.13
  -6   2 -11    3.99    1.42
  -7  -1  11    0.66    1.73
  -6  -1  11   -2.31    1.52
  -6  -1  11   -0.39    1.16
   5   1 -11    2.37    1.26
  -5  -1  11    4.04    1.56
   4   1 -11   37.68    2.19
  -4  -1  11   36.77    2.36
   3   1 -11    0.37    1.11
  -3  -1  11   -0.88    1.16
   2   1 -11   68.06    2.58
  -2  -1  11   67.82    2.64
   1   1 -11   62.54    2.41
  -1  -1  11   64.38    2.49
   0  -1  11   40.37    1.50
   0  -1  11   40.72    1.76
   0  -1  11   41.24    2.02
  -1   1 -11   51.58    2.24
  -1   1 -11   62.49    2.43
   1  -1  11   66.32    2.28
   1  -1  11   62.59    2.46
   1  -1  11   66.76    2.15
  -2   1 -11   76.59    2.40
  -2   1 -11   71.81    2.34
   2  -1  11   74.03    2.29
   2  -1  11   68.88    2.93
  -3   1 -11    0.56    0.89
  -3   1 -11    0.23    0.70
   3  -1  11    2.04    1.36
  -4   1 -11   40.31    2.18
  -4   1 -11   36.18    1.59
   4  -1  11   36.86    2.72
  -5   1 -11    2.84    1.27
   5  -1  11    2.26    1.75
  -6   1 -11    1.38    1.27
   6  -1  11    1.33    1.99
  -7   0  11   -1.76    1.61
  -6   0  11    4.56    1.65
   5   0 -11    0.72    1.14
  -5   0  11    4.50    1.54
   4   0 -11    4.01    1.25
  -4   0  11    2.83    1.34
   3   0 -11    1.56    1.12
  -3   0  11    0.39    1.20
   2   0 -11   71.86    2.67
  -2   0  11   76.97    2.80
  -1   0  11   23.28    1.75
   0   0  11    0.42    0.69
   0   0  11   -0.06    0.87
   0   0  11    0.73    1.11
  -1   0 -11   27.92    1.73
   1   0  11   25.84    1.66
   1   0  11   24.15    1.53
   1   0  11   22.55    1.83
  -2   0 -11   70.26    2.36
   2   0  11   69.92    2.24
   2   0  11   74.98    2.53
   2   0  11   69.94    2.90
  -3   0 -11    0.90    0.93
  -3   0 -11    1.53    0.72
   3   0  11    0.07    1.34
  -4   0 -11    2.69    1.11
  -4   0 -11    3.22    0.77
   4   0  11    3.77    1.68
  -5   0 -11    0.67    1.19
   5   0  11   -2.38    1.67
  -6   0 -11    6.76    1.49
   6   0  11   10.36    2.36
   7   0  11   -1.46    2.08
  -7   1  11    0.72    1.65
  -6   1  11    0.58    1.51
   5  -1 -11    3.13    1.23
  -5   1  11    3.10    1.45
   4  -1 -11   35.51    2.16
  -4   1  11   36.65    2.21
   3  -1 -11    1.18    1.10
  -3   1  11    2.16    1.23
  -2   1  11   72.93    2.74
  -1   1  11   62.87    1.99
  -1   1  11   62.59    2.52
   0   1  11   40.16    1.88
   0   1  11   42.43    2.09
   1   1  11   63.25    2.14
   1   1  11   65.62    2.36
   1   1  11   60.42    2.56
  -2  -1 -11   67.97    2.37
   2   1  11   71.27    2.49
   2   1  11   72.91    2.93
   2   1  11   70.08    2.30
  -3  -1 -11    0.89    0.74
   3   1  11    3.09    1.42
  -4  -1 -11   36.71    2.08
   4   1  11   35.87    2.67
  -5  -1 -11    2.76    1.30
   5   1  11    1.36    1.89
  -6  -1 -11    0.17    1.08
   6   1  11   -1.15    1.86
   7   1  11    2.02    2.28
  -7   2  11    0.91    1.63
  -6   2  11   -0.36    1.42
   5  -2 -11    3.42    1.19
  -5   2  11    6.97    1.54
   4  -2 -11    5.44    1.27
  -4   2  11    4.02    0.93
  -4   2  11    5.69    1.40
   3  -2 -11    4.37    1.17
  -3   2  11    2.74    1.28
  -3   2  11    3.45    0.80
  -2   2  11   55.80    2.43
  -1   2  11   18.94    1.63
   0   2  11    7.23    1.27
   1   2  11   20.28    1.56
   1   2  11   21.78    1.69
   1   2  11   20.85    1.61
  -2  -2 -11   59.38    2.18
   2   2  11   58.36    2.30
   2   2  11   55.55    2.69
   2   2  11   54.91    2.12
  -3  -2 -11    4.03    0.87
   3   2  11    3.67    0.86
   3   2  11    5.62    1.53
   4   2  11    1.22    1.56
   5   2  11    4.97    1.97
   6   2  11    3.60    2.10
   7   2  11    2.04    2.28
  -7   3  11    1.95    1.61
  -6   3  11    6.89    1.61
  -5   3  11   11.94    1.67
   4  -3 -11   26.51    1.92
  -4   3  11   20.81    1.86
  -4   3  11   22.98    1.70
  -3   3  11   12.98    1.52
  -2   3  11   30.69    1.99
  -1   3  11    1.32    1.15
   0   3  11   57.90    2.40
   1   3  11    0.68    1.00
   1   3  11    1.00    1.16
   2   3  11   34.27    1.82
   2   3  11   34.29    2.28
  -3  -3 -11   13.67    1.20
   3   3  11   12.23    1.17
   3   3  11   14.53    1.86
   4   3  11   30.05    2.62
   5   3  11   13.61    2.21
   6   3  11    6.28    2.14
   7   3  11   -1.63    1.99
  -7   4  11    1.91    1.54
  -6   4  11    6.49    1.58
  -5   4  11    3.16    1.46
   4  -4 -11    2.02    1.17
  -4   4  11    3.23    1.39
  -3   4  11   16.53    1.67
  -2   4  11    3.45    1.25
  -1   4  11   78.20    2.92
   0   4  11   -0.09    1.05
   1   4  11   81.34    2.85
   2   4  11    4.77    1.17
   2   4  11    3.74    1.39
   3   4  11   18.06    1.40
   3   4  11   20.56    2.11
   4   4  11    2.89    1.80
   5   4  11    3.44    1.86
   6   4  11   10.04    2.40
   7   4  11    0.38    2.18
  -6   5  11    0.79    1.47
  -5   5  11    2.47    1.45
  -4   5  11    7.81    1.53
  -3   5  11   14.21    1.62
  -2   5  11    2.87    1.23
  -1   5  11    7.55    1.42
   0   5  11  118.33    3.67
   1   5  11    7.84    1.37
   2   5  11    1.90    1.42
   2   5  11    2.07    1.13
   3   5  11   15.28    2.01
   3   5  11   15.67    1.50
   4   5  11    1.14    1.62
   5   5  11    4.57    1.93
   6   5  11    2.34    2.14
  -6   6  11    1.21    1.55
  -5   6  11    0.00    1.39
  -4   6  11    1.98    1.38
  -3   6  11    8.40    1.52
  -2   6  11   10.00    1.50
  -1   6  11  107.73    3.55
   0   6  11   49.35    2.42
   1   6  11  111.59    3.56
   2   6  11   10.51    1.50
   3   6  11   13.33    1.55
   3   6  11   13.71    1.96
   4   6  11   -0.21    1.61
   5   6  11    1.39    1.82
   6   6  11    1.41    2.02
  -6   7  11    1.61    1.59
  -5   7  11   -0.48    1.42
  -4   7  11    0.91    1.40
  -3   7  11   10.85    1.66
  -2   7  11   -0.80    1.26
  -1   7  11    1.43    1.30
   0   7  11   71.32    2.95
   1   7  11    1.23    1.27
   2   7  11   -1.65    1.22
   3   7  11    6.56    1.77
   3   7  11   12.84    1.65
   4   7  11    0.17    1.77
   5   7  11   -4.27    1.74
   6   7  11    1.95    2.11
  -6   8  11    0.22    1.59
  -5   8  11    3.08    1.58
  -4   8  11    1.57    1.47
  -3   8  11    0.80    1.44
  -1   8  11   30.75    2.31
   0   8  11   62.06    2.85
   1   8  11   34.18    2.32
   2   8  11   48.99    2.62
   3   8  11   -0.31    1.36
   4   8  11   -1.30    1.75
   5   8  11    3.48    2.07
   6   8  11    0.10    2.20
  -6   9  11    2.06    1.63
  -5   9  11    1.62    1.63
  -4   9  11    5.23    1.65
  -3   9  11    3.23    1.54
  -2   9  11   28.51    2.38
  -1   9  11    8.00    1.66
   0   9  11  176.56    5.15
   1   9  11    6.75    1.63
   2   9  11   31.86    2.34
   3   9  11    3.61    1.52
   4   9  11    2.68    1.94
   5   9  11   -0.49    2.00
   6   9  11   -0.41    2.24
  -5  10  11    4.55    1.77
  -4  10  11    3.75    1.68
  -3  10  11    0.34    1.46
  -1  10  11   16.48    1.92
   0  10  11    2.23    1.53
   1  10  11   16.12    2.02
   2  10  11   30.29    2.49
   3  10  11   -0.83    1.42
   4  10  11    3.14    2.01
   5  10  11    2.14    2.12
  -5  11  11    1.26    1.71
  -4  11  11    8.43    1.84
  -3  11  11    6.38    1.77
  -2  11  11    6.59    1.71
  -1  11  11   19.67    2.08
   0  11  11   10.56    1.91
   1  11  11   22.07    2.21
   2  11  11    6.38    1.89
   3  11  11    9.24    1.98
   4  11  11    8.39    2.35
   5  11  11   -0.41    2.19
  -4  12  11    0.70    1.64
  -3  12  11    1.28    1.66
  -2  12  11    3.21    1.64
  -1  12  11    0.93    1.61
   0  12  11   -1.30    1.63
   1  12  11   -1.07    1.55
   2  12  11    3.93    1.77
   3  12  11    1.50    1.72
   4  12  11    0.79    2.10
  -4  13  11    7.25    1.95
  -3  13  11   -0.05    1.71
  -2  13  11    0.49    1.60
  -1  13  11    7.96    1.91
   0  13  11   22.13    2.39
   1  13  11    5.27    1.87
   2  13  11    0.22    1.72
   3  13  11    1.82    1.81
  -3  14  11    7.32    2.00
  -2  14  11    4.25    1.80
  -1  14  11   10.03    2.00
   0  14  11    6.16    2.04
   1  14  11    7.17    2.13
   2  14  11    2.12    1.93
   3  14  11    4.40    1.96
  -2  15  11    2.91    1.85
  -1  15  11    3.08    1.93
   0  15  11   26.90    2.74
   1  15  11    0.02    2.02
   2  15  11    5.72    2.25
  -1  16  11    3.40    1.99
   0  16  11   -1.67    1.96
   1  16  11    2.91    2.20
   2  15 -12    7.95    2.26
  -2 -15  12    9.66    2.30
   1  15 -12   -2.34    1.82
   0  15 -12    4.60    1.99
  -1  15 -12    1.98    1.75
  -2  15 -12    4.52    1.86
   3  14 -12    5.98    2.25
  -3 -14  12   10.22    2.28
   2  14 -12   11.55    2.28
  -2 -14  12   15.32    2.38
   1  14 -12    3.87    1.92
  -1 -14  12    2.14    1.87
   0  14 -12   17.94    2.28
  -1  14 -12    2.04    1.65
  -2  14 -12    9.76    1.91
  -3  14 -12   11.76    1.92
   4  13 -12    0.67    2.03
  -4 -13  12    2.90    2.00
   3  13 -12   10.17    2.31
  -3 -13  12   14.24    2.35
   2  13 -12    8.44    2.10
  -2 -13  12    7.66    2.07
   1  13 -12    5.60    1.89
  -1 -13  12    9.54    2.01
   0  13 -12   -1.16    1.54
   0 -13  12    1.02    1.65
  -1  13 -12    6.66    1.77
  -2  13 -12   11.50    1.84
  -3  13 -12   13.12    1.88
  -4  13 -12    2.15    1.49
   4  12 -12    0.95    1.95
  -4 -12  12    1.57    1.90
   3  12 -12    7.14    2.04
  -3 -12  12    4.97    1.89
   2  12 -12    0.71    1.75
  -2 -12  12    0.39    1.73
   1  12 -12   14.09    2.09
  -1 -12  12   17.10    2.20
   0  12 -12    8.18    1.80
   0 -12  12   12.53    1.92
  -1  12 -12   18.78    2.16
  -2  12 -12    2.29    1.48
  -3  12 -12    8.55    1.63
  -4  12 -12    2.01    1.39
  -5 -11  12   -1.93    1.78
   4  11 -12    4.52    2.00
  -4 -11  12    1.35    1.88
   3  11 -12    3.39    1.88
  -3 -11  12    3.19    1.85
   2  11 -12    6.64    1.88
  -2 -11  12    4.04    1.80
   1  11 -12   11.56    1.93
  -1 -11  12   15.05    2.04
   0  11 -12   11.19    1.87
   0 -11  12   16.37    1.99
  -1  11 -12   13.86    1.88
   1 -11  12   13.21    1.76
  -2  11 -12    4.71    1.48
  -3  11 -12    3.55    1.40
  -4  11 -12    4.09    1.38
  -5  11 -12    2.99    1.26
   5  10 -12    4.41    2.04
  -5 -10  12    4.34    1.95
   4  10 -12   -1.99    1.73
  -4 -10  12   -0.40    1.70
   3  10 -12   13.39    2.04
  -3 -10  12   10.19    2.01
   2  10 -12   14.28    2.03
  -2 -10  12   15.23    2.08
   1  10 -12   43.32    2.73
  -1 -10  12   39.85    2.67
   0  10 -12   62.73    3.01
   0 -10  12   62.57    2.92
  -1  10 -12   37.74    2.52
   1 -10  12   40.80    2.40
  -2  10 -12   17.70    1.83
  -3  10 -12   12.45    1.63
  -4  10 -12    1.54    1.20
  -5  10 -12    4.61    1.23
   5   9 -12    1.27    1.87
  -5  -9  12   -0.92    1.73
   4   9 -12    2.93    1.78
  -4  -9  12    0.99    1.70
   3   9 -12   34.68    2.62
  -3  -9  12   26.18    2.44
   2   9 -12    6.56    1.71
  -2  -9  12    4.59    1.71
   1   9 -12   48.77    2.76
  -1  -9  12   49.75    2.74
   0   9 -12   10.91    1.67
   0  -9  12   12.58    1.74
  -1   9 -12   51.47    2.64
   1  -9  12   48.52    2.53
  -2   9 -12    6.46    1.40
   2  -9  12    6.37    1.24
  -3   9 -12   30.30    2.13
  -4   9 -12    1.48    1.13
  -5   9 -12    0.81    1.48
  -5   9 -12   -0.41    1.10
  -6  -8  12    2.96    1.93
   5   8 -12   -2.81    1.60
  -5  -8  12    0.93    1.73
   4   8 -12    1.93    1.68
  -4  -8  12    1.30    1.61
   3   8 -12    3.99    1.63
  -3  -8  12    3.50    1.65
   2   8 -12   14.92    1.91
  -2  -8  12   11.13    1.86
   1   8 -12   26.72    2.14
  -1  -8  12   26.32    2.20
   0   8 -12   53.95    2.68
   0  -8  12   54.77    2.62
  -1   8 -12   24.87    2.10
   1  -8  12   27.49    1.93
  -2   8 -12   14.27    1.59
   2  -8  12   18.01    1.52
  -3   8 -12    4.64    1.25
  -4   8 -12    0.13    1.06
  -4   8 -12    3.13    1.33
  -5   8 -12    1.37    1.06
  -5   8 -12    1.76    1.45
  -6  -7  12    0.37    1.88
   5   7 -12    1.15    1.62
  -5  -7  12   -0.44    1.65
   4   7 -12   15.36    2.02
  -4  -7  12   14.09    2.00
   3   7 -12    3.88    1.58
  -3  -7  12    0.92    1.54
   2   7 -12   13.14    1.76
  -2  -7  12   19.03    1.95
   1   7 -12   52.62    2.61
  -1  -7  12   45.30    2.54
   0   7 -12    0.63    1.18
   0   7 -12    0.62    0.55
   0  -7  12    1.37    1.33
  -1   7 -12   47.36    2.39
   1  -7  12   48.78    2.31
  -2   7 -12   22.20    1.69
   2  -7  12   18.51    1.48
  -3   7 -12    4.61    1.20
  -3   7 -12    5.11    1.18
  -4   7 -12   16.36    1.79
  -4   7 -12   18.66    1.47
  -5   7 -12    3.27    1.02
  -5   7 -12    3.53    1.48
  -6  -6  12   13.21    2.22
   5   6 -12   -2.64    1.42
  -5  -6  12   -0.38    1.61
   4   6 -12   -0.59    1.44
  -4  -6  12    0.32    1.50
   3   6 -12    6.61    1.60
  -3  -6  12    4.92    1.59
   2   6 -12   10.10    1.65
  -2  -6  12   12.32    1.75
   1   6 -12  200.15    5.43
  -1  -6  12  195.38    5.39
   0   6 -12   11.74    1.47
   0   6 -12   13.63    0.90
   0   6 -12   12.56    1.20
   0  -6  12    9.80    1.49
  -1   6 -12  202.73    4.52
  -1   6 -12  205.17    5.31
   1  -6  12  194.95    5.16
  -2   6 -12   12.42    1.24
  -2   6 -12   14.14    1.46
   2  -6  12   12.30    1.25
  -3   6 -12    5.70    1.21
  -3   6 -12    7.05    1.14
  -4   6 -12   -1.20    0.91
  -4   6 -12   -0.83    1.14
  -5   6 -12    1.90    0.94
  -5   6 -12    0.35    1.31
  -6  -5  12    4.60    1.90
   5   5 -12    8.07    1.74
  -5  -5  12    7.50    1.84
   4   5 -12   12.41    1.73
  -4  -5  12    7.56    1.75
   3   5 -12    0.85    1.37
  -3  -5  12    1.99    1.42
   2   5 -12   50.25    2.55
  -2  -5  12   56.88    2.70
   1   5 -12    5.94    0.77
   1   5 -12    5.64    1.29
  -1  -5  12    4.69    1.38
   0   5 -12    1.57    1.12
   0   5 -12    1.35    0.49
   0   5 -12    3.53    1.04
   0  -5  12    3.63    1.22
  -1   5 -12    5.12    0.80
  -1   5 -12    6.57    1.24
   1  -5  12    4.95    1.19
  -2   5 -12   49.97    2.02
  -2   5 -12   48.58    2.19
   2  -5  12   52.82    2.04
  -3   5 -12    0.71    0.91
  -3   5 -12    0.63    0.97
  -4   5 -12    8.28    1.08
  -4   5 -12    9.19    1.47
  -5   5 -12    7.37    1.56
  -5   5 -12    7.29    0.97
  -6   5 -12    4.04    1.59
  -6  -4  12    1.55    1.73
   5   4 -12    3.09    1.44
  -5  -4  12    3.52    1.65
   4   4 -12    2.05    1.38
  -4  -4  12    5.41    1.62
   3   4 -12    2.05    1.35
  -3  -4  12    4.54    1.51
   2   4 -12    5.55    1.35
  -2  -4  12    8.24    1.51
   1   4 -12   -0.81    1.12
  -1  -4  12    2.33    1.26
   0   4 -12    5.33    1.19
   0   4 -12    7.28    1.08
   0  -4  12    7.70    1.32
  -1   4 -12    1.17    0.99
  -1   4 -12    3.52    1.12
  -1   4 -12    0.90    0.65
   1  -4  12    1.17    1.05
  -2   4 -12    9.04    1.06
  -2   4 -12   10.16    1.09
  -2   4 -12    9.06    1.20
   2  -4  12   10.10    1.10
  -3   4 -12    3.63    0.86
  -3   4 -12    1.15    0.92
  -3   4 -12    2.44    1.08
  -4   4 -12    5.26    1.30
  -4   4 -12    4.56    0.94
  -5   4 -12    0.74    1.41
  -6   4 -12    1.39    1.51
  -6  -3  12   10.91    1.94
   5   3 -12    2.31    1.36
  -5  -3  12    1.22    1.58
   4   3 -12    8.38    1.56
  -4  -3  12    9.59    1.68
   3   3 -12   27.56    2.13
  -3  -3  12   29.98    2.25
   2   3 -12   25.50    1.95
  -2  -3  12   25.87    2.06
   1   3 -12    8.37    1.31
  -1  -3  12    7.55    1.41
   0   3 -12   11.13    1.31
   0   3 -12   11.12    0.99
   0  -3  12   10.51    1.41
  -1   3 -12    8.08    1.06
  -1   3 -12    7.74    0.84
  -1   3 -12    7.28    1.17
   1  -3  12    5.87    1.19
  -2   3 -12   20.34    1.66
  -2   3 -12   24.12    1.61
  -2   3 -12   23.95    1.53
   2  -3  12   24.49    1.50
  -3   3 -12   29.43    1.68
  -3   3 -12   32.27    1.92
  -3   3 -12   30.06    1.72
  -4   3 -12    9.19    1.41
  -4   3 -12    8.77    1.02
  -5   3 -12   -0.38    1.28
  -6   3 -12   10.69    1.82
  -7  -2  12    5.81    1.96
  -6  -2  12    3.72    1.78
   5   2 -12    2.03    1.36
  -5  -2  12    2.27    1.01
  -5  -2  12    2.67    1.60
   4   2 -12   30.52    2.16
  -4  -2  12   29.07    2.35
   3   2 -12   58.43    2.59
  -3  -2  12   60.18    2.74
   2   2 -12   30.61    2.01
  -2  -2  12   26.59    2.06
   1   2 -12    4.04    1.19
  -1  -2  12    3.85    1.27
   0   2 -12  162.24    4.42
   0   2 -12  166.62    4.29
   0  -2  12  169.54    3.68
   0  -2  12  169.91    4.49
  -1   2 -12    4.54    1.15
  -1   2 -12    3.83    1.03
   1  -2  12    5.36    1.20
   1  -2  12    4.27    1.14
  -2   2 -12   29.79    1.70
  -2   2 -12   25.75    1.71
  -2   2 -12   31.46    1.64
   2  -2  12   27.13    2.19
   2  -2  12   29.43    1.55
  -3   2 -12   58.49    2.16
  -3   2 -12   55.42    2.31
  -3   2 -12   61.72    2.16
   3  -2  12   58.29    2.97
  -4   2 -12   29.26    2.06
  -4   2 -12   31.63    1.61
   4  -2  12   33.32    2.68
  -5   2 -12    2.66    1.30
   5  -2  12    4.30    1.93
  -6   2 -12    6.08    1.63
  -7  -1  12    2.17    1.81
  -6  -1  12    2.40    1.69
   5   1 -12   13.79    1.67
  -5  -1  12   15.04    1.89
   4   1 -12    3.03    1.32
  -4  -1  12    4.67    1.50
   3   1 -12  144.84    4.25
  -3  -1  12  150.92    4.40
   2   1 -12   34.53    2.05
  -2  -1  12   35.55    2.11
   1   1 -12   51.49    2.27
  -1  -1  12   55.58    2.37
   0   1 -12   25.14    1.81
   0  -1  12   27.04    1.81
   0  -1  12   21.99    1.51
   0  -1  12   28.08    1.32
  -1   1 -12   51.91    2.30
   1  -1  12   57.14    2.06
   1  -1  12   54.32    2.37
   1  -1  12   55.56    2.20
  -2   1 -12   38.39    1.82
  -2   1 -12   36.14    1.70
   2  -1  12   32.81    1.65
   2  -1  12   33.08    2.29
  -3   1 -12  153.72    3.90
  -3   1 -12  147.29    4.02
   3  -1  12  151.65    4.85
  -4   1 -12    8.19    1.35
   4  -1  12    8.44    1.86
  -5   1 -12   14.71    1.71
   5  -1  12   16.23    2.38
  -6   1 -12    4.53    1.51
   6  -1  12    3.28    2.18
  -7   0  12   -0.16    1.70
  -6   0  12   -1.26    1.54
   5   0 -12   12.08    1.57
  -5   0  12   11.31    1.75
   4   0 -12    2.09    1.22
  -4   0  12    2.06    1.40
   3   0 -12   53.66    2.42
  -3   0  12   55.41    2.58
   2   0 -12    3.26    1.16
  -2   0  12    3.79    1.28
  -1   0  12  109.24    3.39
   0   0  12  109.14    3.35
   0   0  12  109.95    2.76
   0   0  12  109.77    3.16
   1   0  12  108.45    3.21
   1   0  12  111.80    2.99
   1   0  12  108.09    3.42
  -2   0 -12    5.24    0.94
   2   0  12    1.76    0.90
   2   0  12    4.43    1.02
   2   0  12    4.13    1.37
  -3   0 -12   56.99    2.31
  -3   0 -12   58.89    2.12
   3   0  12   57.26    3.01
  -4   0 -12    1.71    1.12
   4   0  12    2.59    1.64
  -5   0 -12   12.23    1.63
   5   0  12   13.07    2.23
  -6   0 -12   -1.47    1.23
   6   0  12   -0.35    1.93
   7   0  12    1.35    2.23
  -7   1  12   -0.06    1.66
  -6   1  12    3.00    1.61
   5  -1 -12   13.55    1.63
  -5   1  12   10.75    1.68
   4  -1 -12    7.23    1.37
  -4   1  12    3.17    1.42
   3  -1 -12  137.16    4.00
  -3   1  12  142.27    4.20
  -2   1  12   34.79    2.11
  -1   1  12   55.70    1.90
  -1   1  12   58.26    2.43
   0   1  12   28.20    1.69
   0   1  12   27.75    1.88
   1   1  12   56.07    2.08
   1   1  12   53.47    2.42
   1   1  12   56.72    2.23
  -2  -1 -12   30.78    1.75
   2   1  12   33.58    1.71
   2   1  12   35.12    1.92
   2   1  12   37.78    2.30
  -3  -1 -12  146.22    3.78
   3   1  12  145.22    4.72
   3   1  12  140.44    3.55
   4   1  12    5.34    1.80
  -5  -1 -12   10.01    1.50
   5   1  12   14.50    2.27
  -6  -1 -12    1.41    1.20
   6   1  12    2.06    1.98
   7   1  12    2.89    2.30
  -7   2  12    2.08    1.69
  -6   2  12    0.77    1.49
   5  -2 -12    2.97    1.24
  -5   2  12    3.42    1.48
   4  -2 -12   27.11    2.02
  -4   2  12   33.26    2.26
   3  -2 -12   52.16    2.40
  -3   2  12   54.02    2.52
  -2   2  12   29.30    2.03
  -1   2  12    3.46    1.23
   0   2  12  168.22    4.53
   0   2  12  169.59    4.56
   1   2  12    5.01    1.26
   1   2  12    4.29    0.93
   1   2  12    3.94    1.18
   2   2  12   27.42    1.71
   2   2  12   30.03    2.22
  -3  -2 -12   59.29    2.20
   3   2  12   57.88    2.98
   3   2  12   53.50    1.99
   4   2  12   28.27    2.49
   5   2  12    4.00    1.87
   6   2  12    5.91    2.14
   7   2  12    6.01    2.52
  -6   3  12    6.65    1.68
  -5   3  12    0.67    1.37
   4  -3 -12    9.09    1.40
  -4   3  12    4.62    1.47
  -3   3  12   22.58    1.90
  -2   3  12   24.57    1.97
  -1   3  12    5.85    1.31
   0   3  12    4.40    1.21
   1   3  12    9.40    1.42
   1   3  12    6.35    1.29
   2   3  12   20.93    1.92
   2   3  12   23.95    1.72
   3   3  12   28.75    1.66
   3   3  12   30.63    2.50
   4   3  12    8.17    1.90
   5   3  12    2.20    1.78
   6   3  12    8.58    2.34
  -6   4  12   -0.07    1.50
  -5   4  12    2.38    1.46
   4  -4 -12    4.62    1.33
  -4   4  12    4.09    1.48
  -3   4  12    2.84    1.31
  -2   4  12    6.31    1.41
  -1   4  12    0.35    1.20
   0   4  12    5.55    1.30
   1   4  12   -0.13    1.07
   2   4  12    6.61    1.57
   2   4  12    8.70    1.34
   3   4  12    2.66    1.04
   3   4  12    3.08    1.60
   4   4  12    1.99    1.75
   5   4  12    3.47    1.89
   6   4  12    1.99    2.02
  -6   5  12   -0.78    1.49
  -5   5  12    6.47    1.64
  -4   5  12    4.71    1.46
  -3   5  12    0.39    1.33
  -2   5  12   50.18    2.54
  -1   5  12    5.42    1.40
   0   5  12   -0.89    1.13
   1   5  12    3.07    1.24
   2   5  12   52.86    2.85
   2   5  12   48.98    2.34
   3   5  12    1.23    1.60
   3   5  12   -0.71    1.05
   4   5  12    4.71    1.87
   5   5  12    9.34    2.23
   6   5  12   -0.45    1.98
  -6   6  12   13.67    1.93
  -5   6  12    1.34    1.45
  -4   6  12    0.12    1.38
  -3   6  12    4.11    1.48
  -2   6  12   10.42    1.64
  -1   6  12  182.82    5.14
   0   6  12   11.01    1.55
   1   6  12  189.15    5.17
   2   6  12   11.05    1.57
   3   6  12    3.54    1.60
   3   6  12    2.56    1.21
   4   6  12    0.40    1.75
   5   6  12   -0.28    1.91
   6   6  12    7.97    2.33
  -6   7  12    5.05    1.75
  -5   7  12    2.32    1.50
  -4   7  12   12.51    1.79
  -3   7  12    5.64    1.54
  -2   7  12   13.98    1.75
  -1   7  12   46.29    2.56
   0   7  12   -0.69    1.23
   1   7  12   45.96    2.49
   2   7  12   19.03    1.86
   3   7  12    7.25    1.53
   3   7  12    3.94    1.70
   4   7  12   11.87    2.22
   5   7  12    3.04    2.06
   6   7  12    2.04    2.22
  -6   8  12    0.46    1.62
  -5   8  12    2.53    1.59
  -4   8  12    0.90    1.53
  -3   8  12    1.51    1.49
  -2   8  12   10.56    1.70
  -1   8  12   22.12    1.99
   0   8  12   48.11    2.68
   1   8  12   24.36    2.12
   2   8  12   10.40    1.80
   3   8  12    2.90    1.83
   3   8  12    4.95    1.60
   4   8  12    0.29    1.87
   5   8  12    2.38    2.05
   6   8  12    2.88    2.27
  -5   9  12    3.09    1.70
  -4   9  12   -2.36    1.46
  -3   9  12   24.13    2.20
  -2   9  12    3.03    1.55
  -1   9  12   46.30    2.75
   0   9  12    8.77    1.78
   1   9  12   43.55    2.66
   2   9  12    2.69    1.56
   3   9  12   31.82    2.50
   4   9  12    0.28    1.86
   5   9  12    1.16    2.11
  -5  10  12    2.77    1.75
  -4  10  12    2.02    1.63
  -3  10  12    7.76    1.77
  -2  10  12   13.04    1.90
  -1  10  12   36.58    2.63
   0  10  12   52.29    2.89
   1  10  12   36.00    2.61
   2  10  12   11.66    2.00
   3  10  12   11.71    1.98
   4  10  12    0.80    1.94
   5  10  12    1.67    2.18
  -5  11  12   -0.14    1.69
  -4  11  12    3.20    1.73
  -3  11  12    4.16    1.65
  -2  11  12    2.96    1.70
  -1  11  12   11.63    1.94
   0  11  12    7.50    1.85
   1  11  12    9.20    1.94
   2  11  12    1.18    1.62
   3  11  12    0.91    1.70
   4  11  12    3.32    2.16
   5  11  12    0.23    2.25
  -4  12  12    1.67    1.72
  -3  12  12    6.74    1.82
  -2  12  12   -0.10    1.59
  -1  12  12    7.27    1.86
   0  12  12    4.90    1.88
   1  12  12   15.09    2.18
   2  12  12   -1.23    1.66
   3  12  12    5.17    1.82
   4  12  12    1.86    2.19
  -4  13  12    2.16    1.80
  -3  13  12    7.91    1.99
  -2  13  12    3.97    1.81
  -1  13  12    6.63    1.91
   0  13  12    2.39    1.81
   1  13  12    2.21    1.78
   2  13  12    0.68    1.76
   3  13  12    7.72    2.01
   4  13  12    3.50    2.42
  -3  14  12    5.58    1.90
  -2  14  12   10.67    2.08
  -1  14  12    3.32    1.84
   0  14  12   11.63    2.20
   1  14  12    0.38    1.80
   2  14  12   11.69    2.30
  -2  15  12    5.92    2.02
  -1  15  12    3.92    2.02
   0  15  12    0.21    1.95
   1  15  12    1.43    1.99
   2  15  12    4.59    2.11
   1  15 -13    6.90    2.13
  -1 -15  13    4.24    2.04
   0  15 -13    1.99    1.85
  -1  15 -13    4.06    1.89
  -3 -14  13   -3.85    1.89
   2  14 -13   16.23    2.49
  -2 -14  13   17.15    2.52
   1  14 -13    3.50    1.94
  -1 -14  13    4.00    1.96
   0  14 -13    0.61    1.72
   0 -14  13   -0.35    1.70
  -1  14 -13   -0.06    1.66
  -2  14 -13   19.95    2.32
   3  13 -13    4.31    2.13
  -3 -13  13    4.37    2.07
   2  13 -13    7.38    2.09
  -2 -13  13    5.69    2.08
   1  13 -13    0.38    1.76
  -1 -13  13    1.76    1.83
   0  13 -13    6.21    1.83
   0 -13  13    6.16    1.87
  -1  13 -13    0.79    1.61
  -2  13 -13    7.25    1.78
  -3  13 -13    6.24    1.70
   4  12 -13    3.65    2.11
  -4 -12  13    4.25    2.04
   3  12 -13   15.73    2.40
  -3 -12  13   15.24    2.32
   2  12 -13   -0.26    1.76
  -2 -12  13    0.97    1.80
   1  12 -13   15.61    2.19
  -1 -12  13   15.60    2.26
   0  12 -13   11.68    1.98
   0 -12  13   12.41    1.96
  -1  12 -13   15.00    1.99
   1 -12  13   14.00    1.88
  -2  12 -13   -0.23    1.36
  -3  12 -13   18.77    2.02
  -4  12 -13    5.43    1.52
   4  11 -13   17.82    2.40
  -4 -11  13   14.73    2.29
   3  11 -13    0.32    1.82
  -3 -11  13    2.87    1.89
   2  11 -13    1.53    1.71
  -2 -11  13    2.63    1.81
   1  11 -13   19.94    2.25
  -1 -11  13   22.27    2.29
   0  11 -13   -1.61    1.38
   0 -11  13    3.28    1.63
  -1  11 -13   16.87    1.96
   1 -11  13   21.35    2.05
  -2  11 -13    1.08    1.40
  -3  11 -13    1.40    1.36
  -4  11 -13   15.91    1.76
   5  10 -13    1.54    2.01
  -5 -10  13   -1.27    1.78
   4  10 -13   -1.48    1.79
  -4 -10  13   -1.61    1.66
   3  10 -13   16.57    2.23
  -3 -10  13   11.75    2.15
   2  10 -13    9.24    1.91
  -2 -10  13    6.94    1.85
   1  10 -13   -1.32    1.51
  -1 -10  13    0.47    1.59
   0  10 -13   29.15    2.34
   0 -10  13   29.04    2.34
  -1  10 -13    1.75    1.42
   1 -10  13    1.32    1.37
  -2  10 -13    9.22    1.60
  -3  10 -13   17.12    1.78
  -4  10 -13   -0.44    1.20
  -5  10 -13    3.00    1.62
  -5  10 -13    6.14    1.33
   5   9 -13    7.86    2.06
  -5  -9  13    7.58    2.09
   4   9 -13   21.39    2.36
  -4  -9  13   18.73    2.32
   3   9 -13    3.24    1.73
  -3  -9  13    2.51    1.80
   2   9 -13    0.22    1.56
  -2  -9  13    1.19    1.63
   1   9 -13   28.51    2.39
  -1  -9  13   31.00    2.36
   0   9 -13    0.95    1.34
   0  -9  13    0.35    1.38
  -1   9 -13   25.82    2.11
   1  -9  13   26.54    2.12
  -2   9 -13    1.30    1.27
   2  -9  13    2.10    1.15
  -3   9 -13    0.64    1.18
  -4   9 -13   22.18    1.80
  -4   9 -13   17.90    1.89
  -5   9 -13    7.05    1.78
  -5   9 -13    8.78    1.37
   5   8 -13    1.53    1.71
  -5  -8  13    0.88    1.77
   4   8 -13    1.19    1.67
  -4  -8  13    2.01    1.72
   3   8 -13   16.96    2.04
  -3  -8  13   18.69    2.15
   2   8 -13   19.43    2.07
  -2  -8  13   18.31    2.13
   1   8 -13   21.41    2.02
  -1  -8  13   16.51    1.96
   0   8 -13  155.77    4.72
   0  -8  13  156.05    4.62
  -1   8 -13   17.11    1.22
  -1   8 -13   16.93    1.75
   1  -8  13   18.84    1.75
  -2   8 -13   24.71    1.90
   2  -8  13   21.49    1.64
  -3   8 -13   20.88    1.73
  -3   8 -13   18.75    1.69
  -4   8 -13    1.87    1.11
  -4   8 -13    3.27    1.35
  -5   8 -13    1.47    1.12
  -5   8 -13    2.37    1.44
  -6  -7  13    7.40    2.12
   5   7 -13   45.89    2.92
  -5  -7  13   45.99    3.05
   4   7 -13   26.01    2.30
  -4  -7  13   27.07    2.42
   3   7 -13   29.48    2.41
  -3  -7  13   32.75    2.53
   2   7 -13   12.34    1.75
  -2  -7  13   12.39    1.83
   1   7 -13   -0.92    1.29
  -1  -7  13   -1.58    1.37
   0   7 -13    2.40    0.56
   0   7 -13    2.40    1.28
   0  -7  13    2.02    1.39
  -1   7 -13   -0.10    1.16
  -1   7 -13    1.18    0.75
   1  -7  13    0.24    1.16
  -2   7 -13   12.05    1.49
  -2   7 -13   10.97    1.27
   2  -7  13   12.27    1.35
  -3   7 -13   32.20    2.05
  -3   7 -13   33.45    2.10
  -4   7 -13   31.19    2.28
  -4   7 -13   27.55    1.93
  -5   7 -13   47.09    2.13
  -5   7 -13   49.78    2.85
  -6  -6  13   41.33    3.07
   5   6 -13    4.98    1.75
  -5  -6  13    5.97    1.88
   4   6 -13    6.61    1.72
  -4  -6  13    5.48    1.77
   3   6 -13    6.68    1.67
  -3  -6  13    4.42    1.64
   2   6 -13    7.24    1.61
  -2  -6  13    7.82    1.67
   1   6 -13   10.57    0.98
   1   6 -13    7.69    1.50
  -1  -6  13    7.78    1.59
   0   6 -13    9.27    1.44
   0   6 -13   10.01    1.13
   0  -6  13    9.36    1.57
  -1   6 -13    8.38    1.34
  -1   6 -13    6.92    0.88
   1  -6  13    8.45    1.37
  -2   6 -13    7.65    1.08
  -2   6 -13    9.32    1.33
   2  -6  13    7.03    1.18
  -3   6 -13    8.23    1.27
  -3   6 -13    7.62    1.26
  -4   6 -13    7.02    1.15
  -4   6 -13    4.99    1.35
  -5   6 -13    5.47    1.57
  -5   6 -13    6.56    1.05
  -6  -5  13    3.23    1.87
   5   5 -13   38.77    2.61
  -5  -5  13   41.08    2.85
   4   5 -13    3.39    1.52
  -4  -5  13    6.23    1.69
   3   5 -13   18.13    1.91
  -3  -5  13   15.19    1.86
   2   5 -13    2.17    1.34
  -2  -5  13    2.45    1.41
   1   5 -13    1.76    0.81
   1   5 -13    0.69    1.21
  -1  -5  13   -1.06    1.28
   0   5 -13   32.73    2.11
   0   5 -13   27.83    1.78
   0  -5  13   34.83    2.11
  -1   5 -13    0.44    1.09
  -1   5 -13    0.30    0.66
   1  -5  13    2.18    1.17
  -2   5 -13    0.76    0.86
  -2   5 -13    0.72    1.07
   2  -5  13    0.76    0.95
  -3   5 -13   19.47    1.58
  -3   5 -13   19.62    1.49
  -4   5 -13    5.11    1.07
  -4   5 -13    4.71    1.30
  -5   5 -13   43.99    2.71
  -5   5 -13   42.03    1.87
  -6  -4  13   26.47    2.48
   5   4 -13    9.65    1.72
  -5  -4  13    6.01    1.76
   4   4 -13    5.34    1.56
  -4  -4  13    3.08    1.60
   3   4 -13    6.09    1.54
  -3  -4  13    6.06    1.62
   2   4 -13   56.77    2.63
  -2  -4  13   51.84    2.65
   1   4 -13   15.20    1.60
  -1  -4  13   13.54    1.69
   0   4 -13    1.16    1.06
   0   4 -13   -0.03    0.88
   0  -4  13   -0.68    1.12
  -1   4 -13   14.44    1.46
  -1   4 -13   13.75    1.02
   1  -4  13   13.78    1.43
  -2   4 -13   51.22    2.06
  -2   4 -13   55.55    2.33
   2  -4  13   54.54    2.10
  -3   4 -13    7.30    1.13
  -3   4 -13    6.94    1.19
  -4   4 -13    6.20    1.06
  -4   4 -13    7.76    1.42
  -5   4 -13    5.75    1.50
  -6   4 -13   35.94    2.68
  -6  -3  13    2.25    1.71
   5   3 -13   34.00    2.36
  -5  -3  13   33.15    2.56
   4   3 -13   21.61    1.98
  -4  -3  13   21.59    2.09
   3   3 -13   12.64    1.68
  -3  -3  13   13.10    1.78
   2   3 -13    0.38    1.20
  -2  -3  13    2.27    1.35
   1   3 -13   24.33    1.81
  -1  -3  13   24.28    1.93
   0   3 -13   50.67    2.02
   0   3 -13   51.78    2.36
   0  -3  13   52.07    2.33
  -1   3 -13   22.65    1.77
  -1   3 -13   22.31    1.87
   1  -3  13   22.69    1.72
  -2   3 -13    1.22    0.81
  -2   3 -13    0.29    0.94
   2  -3  13    1.28    0.94
  -3   3 -13   13.26    1.35
  -3   3 -13   15.10    1.33
  -3   3 -13   14.45    1.24
  -4   3 -13   23.81    1.59
  -4   3 -13   22.02    1.81
  -5   3 -13   35.12    2.43
  -5   3 -13   33.47    1.61
  -6   3 -13    1.33    1.46
  -6  -2  13    3.84    1.76
   5   2 -13    9.33    1.65
  -5  -2  13    3.62    1.62
   4   2 -13    1.38    1.34
  -4  -2  13    3.75    1.57
   3   2 -13   69.75    2.85
  -3  -2  13   67.65    2.98
   2   2 -13   34.08    2.15
  -2  -2  13   34.78    2.23
   1   2 -13    8.74    1.35
  -1  -2  13    8.39    1.43
   0   2 -13    8.80    1.06
   0   2 -13    4.23    1.14
   0  -2  13    6.47    1.31
   0  -2  13    5.44    0.77
  -1   2 -13   13.10    1.26
  -1   2 -13   10.43    1.26
   1  -2  13   11.11    1.34
   1  -2  13   11.38    1.41
  -2   2 -13   43.47    1.85
  -2   2 -13   40.67    1.93
  -2   2 -13   35.80    1.93
   2  -2  13   37.63    2.38
   2  -2  13   33.05    1.75
  -3   2 -13   71.62    2.50
  -3   2 -13   70.13    2.63
  -3   2 -13   76.92    2.54
   3  -2  13   71.94    3.36
  -4   2 -13    1.52    1.12
  -4   2 -13    1.58    0.85
   4  -2  13    1.63    1.74
  -5   2 -13    3.36    1.37
  -5   2 -13    6.09    0.89
   5  -2  13    5.63    2.05
  -6   2 -13    6.16    1.66
  -6  -1  13    1.89    1.68
   5   1 -13    1.82    1.36
  -5  -1  13    2.73    1.58
   4   1 -13   98.36    3.52
  -4  -1  13  106.28    3.76
   3   1 -13   35.13    2.20
  -3  -1  13   35.53    2.30
   2   1 -13    8.19    1.35
  -2  -1  13    8.18    1.49
   1   1 -13    7.31    1.27
  -1  -1  13   10.65    1.49
   0   1 -13    6.74    1.21
   0  -1  13    7.09    1.33
   0  -1  13    5.50    0.98
   0  -1  13    6.60    0.83
  -1   1 -13    8.26    1.06
   1  -1  13    8.89    1.27
   1  -1  13    9.31    1.30
   1  -1  13    7.28    1.01
  -2   1 -13   11.36    1.16
   2  -1  13    8.16    1.52
   2  -1  13    8.35    1.16
  -3   1 -13   36.99    2.02
  -3   1 -13   39.02    1.90
   3  -1  13   40.08    2.60
  -4   1 -13   99.61    3.37
   4  -1  13  100.40    4.18
  -5   1 -13    4.04    0.87
  -5   1 -13    3.37    1.39
   5  -1  13    0.81    1.84
  -6   1 -13    7.50    1.70
   6  -1  13    6.26    2.29
  -6   0  13    1.00    1.61
   5   0 -13    6.00    1.51
  -5   0  13    6.92    1.68
   4   0 -13    6.29    1.44
  -4   0  13    3.76    1.48
   3   0 -13   76.46    2.97
  -3   0  13   79.15    3.10
   2   0 -13   39.80    2.20
  -2   0  13   40.83    2.22
  -1   0  13    0.83    1.19
   0   0  13    1.27    1.24
   0   0  13   -0.47    0.88
   0   0  13   -0.12    0.72
   1   0  13   -0.06    0.78
   1   0  13    1.92    1.05
   1   0  13    1.63    1.14
   2   0  13   45.80    1.92
   2   0  13   43.84    2.19
   2   0  13   40.01    2.42
  -3   0 -13   78.88    2.64
   3   0  13   83.84    3.51
   3   0  13   78.48    2.32
  -4   0 -13    6.01    1.29
   4   0  13    4.72    1.85
  -5   0 -13    3.66    1.40
   5   0  13    6.27    1.96
  -6   0 -13    0.00    1.34
   6   0  13    4.26    2.11
  -6   1  13    2.64    1.66
   5  -1 -13    1.82    1.31
  -5   1  13    2.28    1.49
   4  -1 -13   92.00    3.35
  -4   1  13   95.66    3.49
   3  -1 -13   33.80    2.08
  -3   1  13   34.57    2.25
   2  -1 -13    8.12    1.37
  -2   1  13    8.25    1.42
  -1   1  13    7.17    0.87
  -1   1  13    6.49    1.38
   0   1  13    4.60    1.30
   0   1  13    6.36    1.12
   1   1  13   10.74    1.40
   1   1  13    8.30    1.05
   1   1  13    6.32    1.27
   2   1  13    8.99    1.21
   2   1  13   12.35    1.64
  -3  -1 -13   33.92    1.83
   3   1  13   35.27    2.51
   3   1  13   30.97    1.58
   4   1  13  104.48    4.28
   5   1  13    0.40    1.83
   6   1  13    4.03    2.03
  -6   2  13    3.76    1.60
   5  -2 -13    5.56    1.46
  -5   2  13    4.25    1.56
   4  -2 -13    2.03    1.26
  -4   2  13    0.34    1.41
   3  -2 -13   70.93    2.74
  -3   2  13   64.26    2.86
  -2   2  13   33.98    2.21
  -1   2  13   11.12    1.53
   0   2  13    3.57    1.28
   0   2  13    6.00    1.16
   1   2  13    9.13    1.10
   1   2  13   11.12    1.39
   1   2  13   10.34    1.45
   2   2  13   34.02    2.39
   2   2  13   36.90    1.91
   3   2  13   66.70    2.27
   3   2  13   70.37    3.28
   4   2  13    0.73    1.78
   5   2  13    4.49    1.89
   6   2  13    0.96    2.00
  -6   3  13    0.02    1.51
  -5   3  13   28.62    2.34
   4  -3 -13   22.61    1.81
  -4   3  13   18.99    1.93
  -3   3  13   10.17    1.60
  -2   3  13    0.70    1.27
  -1   3  13   20.74    1.78
   0   3  13   48.04    2.35
   1   3  13   20.78    1.68
   1   3  13   20.24    1.77
   2   3  13    1.32    1.38
   2   3  13    1.47    1.08
   3   3  13   12.10    1.95
   3   3  13   11.73    1.27
   4   3  13   22.79    2.45
   5   3  13   32.83    2.96
   6   3  13   -0.13    2.02
  -6   4  13   24.45    2.22
  -5   4  13    4.93    1.62
   4  -4 -13    4.14    1.37
  -4   4  13    3.99    1.52
  -3   4  13    5.45    1.56
  -2   4  13   50.59    2.55
  -1   4  13   11.48    1.54
   0   4  13   -0.29    1.14
   1   4  13   13.32    1.66
   1   4  13   12.31    1.54
   2   4  13   50.02    2.30
   2   4  13   51.90    2.83
   3   4  13    7.19    1.26
   3   4  13    3.81    1.62
   4   4  13    6.57    1.90
   5   4  13    6.37    2.06
   6   4  13   29.34    3.12
  -6   5  13    0.28    1.58
  -5   5  13   41.96    2.65
  -4   5  13    4.38    1.53
  -3   5  13   10.61    1.65
  -2   5  13    0.07    1.34
  -1   5  13    0.96    1.32
   0   5  13   32.23    2.21
   1   5  13    1.50    1.27
   2   5  13    2.58    1.44
   2   5  13   -0.49    1.13
   3   5  13   18.25    2.22
   3   5  13   17.59    1.61
   4   5  13    5.37    1.92
   5   5  13   36.91    3.19
   6   5  13    2.86    2.23
  -6   6  13   39.11    2.76
  -5   6  13    3.31    1.62
  -4   6  13    6.85    1.62
  -3   6  13    4.18    1.54
  -2   6  13    7.30    1.62
  -1   6  13    5.65    1.52
   0   6  13    8.09    1.58
   1   6  13    3.94    1.37
   2   6  13    3.43    1.56
   2   6  13    4.47    1.38
   3   6  13    7.69    1.93
   3   6  13    1.99    1.27
   4   6  13    7.86    2.07
   5   6  13    5.11    2.05
   6   6  13   33.88    3.25
  -6   7  13    9.50    1.92
  -3   7  13   29.44    2.41
  -2   7  13    8.69    1.64
  -1   7  13    0.47    1.43
   0   7  13    2.57    1.40
   1   7  13    0.82    1.34
   2   7  13   10.11    1.72
   3   7  13   31.76    2.77
   3   7  13   27.98    2.24
   4   7  13   24.27    2.66
   6   7  13    3.52    2.29
  -5   8  13    4.45    1.75
  -4   8  13   -0.59    1.50
  -3   8  13   11.75    1.83
  -2   8  13   14.05    1.91
  -1   8  13   15.71    1.94
   0   8  13  145.98    4.62
   1   8  13   14.44    1.90
   2   8  13   19.43    2.02
   3   8  13   15.30    2.37
   3   8  13   17.85    1.96
   4   8  13    0.07    1.92
   5   8  13    0.47    2.04
  -5   9  13    6.30    1.84
  -4   9  13   11.60    1.93
  -3   9  13    1.58    1.59
  -2   9  13    1.28    1.57
  -1   9  13   20.85    2.11
   0   9  13    1.77    1.61
   1   9  13   25.13    2.26
   2   9  13    1.56    1.53
   3   9  13   -0.20    1.75
   3   9  13    1.45    1.52
   4   9  13   10.64    2.33
   5   9  13    2.84    2.12
  -5  10  13    3.92    1.80
  -4  10  13    0.75    1.67
  -3  10  13   11.38    1.86
  -2  10  13    4.29    1.70
  -1  10  13    1.53    1.67
   0  10  13   22.96    2.24
   1  10  13    0.84    1.61
   2  10  13    5.02    1.72
   3  10  13   15.97    2.18
   4  10  13   -0.12    2.00
   5  10  13    2.71    2.29
  -4  11  13    8.20    1.92
  -3  11  13   -1.03    1.52
  -2  11  13    1.26    1.66
  -1  11  13   13.57    2.11
   0  11  13    0.14    1.71
   1  11  13   12.65    2.11
   2  11  13   -0.60    1.66
   3  11  13    2.83    1.75
   4  11  13    6.67    2.26
  -4  12  13    3.80    1.81
  -3  12  13    6.96    1.89
  -2  12  13   -0.27    1.62
  -1  12  13   10.86    2.00
   0  12  13    8.40    1.97
   1  12  13   12.04    2.13
   2  12  13    1.71    1.75
   3  12  13   15.67    2.39
   4  12  13   -0.77    2.10
  -3  13  13    3.55    1.86
  -2  13  13    2.07    1.84
  -1  13  13    4.58    1.92
   0  13  13    0.77    1.85
   1  13  13   -0.21    1.81
   2  13  13    1.74    1.85
  -3  14  13    0.87    1.88
  -2  14  13    7.03    2.06
  -1  14  13    4.57    1.95
   0  14  13    3.36    1.98
   1  14  13    0.80    1.90
   2  14  13    9.60    2.19
  -1  15  13    1.00    1.98
   0  15  13    0.09    1.99
   1  15  13    2.46    2.00
   0  15 -14   -1.77    1.72
   2  14 -14    5.45    2.21
  -2 -14  14    8.82    2.25
   1  14 -14   -0.68    1.79
  -1 -14  14    3.48    1.98
   0  14 -14    1.11    1.75
   0 -14  14    3.91    1.84
  -1  14 -14   -0.71    1.69
  -2  14 -14    8.24    1.89
   3  13 -14    5.85    2.14
  -3 -13  14    6.31    2.14
   2  13 -14    7.96    2.19
  -2 -13  14   14.48    2.45
   1  13 -14   10.12    2.14
  -1 -13  14    9.06    2.13
   0  13 -14    1.71    1.71
   0 -13  14    2.73    1.73
  -1  13 -14   10.34    1.98
  -2  13 -14   14.57    2.04
  -3  13 -14    8.06    1.77
   4  12 -14   -3.07    1.86
  -4 -12  14   -0.33    1.92
   3  12 -14   16.50    2.49
  -3 -12  14   11.76    2.30
   2  12 -14   -0.33    1.83
  -2 -12  14   -1.71    1.73
   1  12 -14    7.28    1.93
  -1 -12  14   10.40    2.05
   0  12 -14    6.66    1.85
   0 -12  14    5.28    1.78
  -1  12 -14    9.95    1.88
   1 -12  14    6.62    1.72
  -2  12 -14    2.36    1.51
  -3  12 -14   15.80    2.00
  -4  12 -14    0.66    1.41
   4  11 -14   10.28    2.29
  -4 -11  14    7.00    2.13
   3  11 -14   13.62    2.23
  -3 -11  14   14.67    2.33
   2  11 -14   19.22    2.28
  -2 -11  14   19.24    2.42
   1  11 -14    8.66    1.94
  -1 -11  14    8.62    1.98
   0  11 -14    1.61    1.55
   0 -11  14    0.61    1.57
  -1  11 -14    9.87    1.78
   1 -11  14   11.67    1.79
  -2  11 -14   18.01    2.04
  -3  11 -14   19.42    2.00
  -4  11 -14   10.55    1.64
  -4  11 -14   11.24    1.76
  -5 -10  14    3.43    1.98
   4  10 -14    2.96    1.91
  -4 -10  14    1.95    1.79
   3  10 -14   -0.73    1.71
  -3 -10  14    1.21    1.82
   2  10 -14    0.64    1.64
  -2 -10  14    2.68    1.75
   1  10 -14    6.69    1.82
  -1 -10  14    6.77    1.82
   0  10 -14   19.74    2.13
   0 -10  14   20.32    2.11
  -1  10 -14    6.25    1.62
   1 -10  14    6.53    1.60
  -2  10 -14    1.13    1.32
  -3  10 -14    0.55    1.24
  -4  10 -14    3.05    1.35
  -4  10 -14    4.52    1.49
  -5  10 -14    6.65    1.41
   5   9 -14    2.47    2.02
  -5  -9  14    2.52    1.93
   4   9 -14    0.26    1.77
  -4  -9  14   -0.66    1.74
   3   9 -14    6.15    1.90
  -3  -9  14    6.15    1.95
   2   9 -14   23.92    2.29
  -2  -9  14   28.22    2.47
   1   9 -14    9.79    1.82
  -1  -9  14   12.46    1.97
   0   9 -14   13.37    1.79
   0  -9  14   11.94    1.82
  -1   9 -14   13.91    1.19
  -1   9 -14   10.63    1.65
   1  -9  14   16.03    1.74
  -2   9 -14   26.29    1.86
  -2   9 -14   27.18    2.09
   2  -9  14   23.28    1.97
  -3   9 -14    4.35    1.30
  -3   9 -14    4.44    1.32
  -4   9 -14    0.28    1.18
  -4   9 -14    0.32    1.30
  -5   9 -14    2.79    1.20
  -5   9 -14    2.95    1.52
   5   8 -14    8.95    2.04
  -5  -8  14    8.43    2.10
   4   8 -14    0.68    1.75
  -4  -8  14    3.23    1.76
   3   8 -14    2.82    1.66
  -3  -8  14    1.61    1.67
   2   8 -14    4.16    1.65
  -2  -8  14    7.94    1.85
   1   8 -14   19.21    2.05
  -1  -8  14   20.83    2.14
   0   8 -14    2.14    1.39
   0  -8  14   -0.58    1.42
  -1   8 -14   20.17    1.90
  -1   8 -14   20.86    1.43
   1  -8  14   19.57    1.85
  -2   8 -14    7.97    1.20
  -2   8 -14    8.87    1.47
   2  -8  14    5.45    1.28
  -3   8 -14    3.02    1.21
  -3   8 -14    3.23    1.22
  -4   8 -14    0.42    1.22
  -4   8 -14    1.16    1.10
  -5   8 -14    9.35    1.74
  -5   8 -14   10.03    1.34
  -6  -7  14    6.56    2.11
   5   7 -14    1.83    1.69
  -5  -7  14    1.03    1.76
   4   7 -14   11.56    1.94
  -4  -7  14    9.40    1.89
   3   7 -14   22.52    2.18
  -3  -7  14   20.48    2.20
   2   7 -14   28.36    2.38
  -2  -7  14   31.93    2.43
   1   7 -14    5.79    1.52
  -1  -7  14    2.80    1.55
   0   7 -14   41.99    2.47
   0  -7  14   38.65    2.45
  -1   7 -14    3.08    1.30
  -1   7 -14    2.63    0.80
   1  -7  14    3.80    1.31
  -2   7 -14   30.22    2.14
  -2   7 -14   31.93    1.80
   2  -7  14   30.19    1.97
  -3   7 -14   23.58    1.76
  -3   7 -14   20.28    1.67
  -4   7 -14   13.42    1.41
  -4   7 -14   12.75    1.65
  -5   7 -14    0.35    1.34
  -5   7 -14   -0.40    0.99
  -6  -6  14    1.34    1.86
   5   6 -14    7.14    1.89
  -5  -6  14    8.37    1.99
   4   6 -14    8.25    1.82
  -4  -6  14    6.80    1.79
   3   6 -14    6.70    1.70
  -3  -6  14    9.61    1.83
   2   6 -14    6.11    1.58
  -2  -6  14    5.42    1.65
   1   6 -14   47.77    2.62
   1   6 -14   53.09    2.01
  -1  -6  14   49.02    2.69
   0   6 -14    5.04    1.35
   0   6 -14    4.37    1.23
   0  -6  14    5.54    1.48
  -1   6 -14   49.60    2.43
  -1   6 -14   50.30    1.81
   1  -6  14   45.60    2.36
  -2   6 -14    3.62    1.21
  -2   6 -14    6.96    1.08
   2  -6  14    5.95    1.20
  -3   6 -14    8.27    1.28
  -3   6 -14    8.39    1.32
  -4   6 -14    7.56    1.18
  -4   6 -14    7.94    1.48
  -5   6 -14    7.95    1.64
  -5   6 -14    7.04    1.12
  -6  -5  14    1.90    1.90
   5   5 -14    3.75    1.60
  -5  -5  14    6.02    1.85
   4   5 -14    3.03    1.61
  -4  -5  14    2.65    1.63
   3   5 -14   14.76    1.87
  -3  -5  14   13.39    1.90
   2   5 -14   22.94    2.02
  -2  -5  14   24.47    2.11
   1   5 -14   28.01    2.15
  -1  -5  14   28.16    2.24
   0   5 -14   13.34    1.63
   0   5 -14   14.33    1.23
   0  -5  14   12.33    1.62
  -1   5 -14   28.66    1.44
  -1   5 -14   28.53    2.09
   1  -5  14   26.95    1.96
  -2   5 -14   23.37    1.95
  -2   5 -14   20.88    1.60
   2  -5  14   23.69    1.63
  -3   5 -14   15.78    1.51
  -3   5 -14   18.15    1.54
  -4   5 -14    4.48    1.07
  -4   5 -14    3.49    1.32
  -5   5 -14    2.73    1.46
  -5   5 -14    4.43    0.97
  -6  -4  14    6.45    1.92
   5   4 -14    2.80    1.55
  -5  -4  14    1.21    1.62
   4   4 -14   14.62    1.86
  -4  -4  14   11.71    1.90
   3   4 -14    0.02    1.37
  -3  -4  14    0.69    1.46
   2   4 -14   13.20    1.73
  -2  -4  14   12.21    1.74
   1   4 -14   38.71    2.28
  -1  -4  14   37.08    2.34
   0   4 -14   23.06    1.95
   0   4 -14   24.88    1.65
   0  -4  14   27.99    1.99
  -1   4 -14   37.80    1.56
  -1   4 -14   37.28    2.17
   1  -4  14   38.35    2.09
  -2   4 -14   11.71    1.18
  -2   4 -14   13.35    1.43
   2  -4  14   11.54    1.31
  -3   4 -14    1.44    1.01
  -3   4 -14    0.40    0.97
  -4   4 -14   16.93    1.70
  -4   4 -14   14.69    1.35
  -5   4 -14    2.48    1.44
  -5   4 -14    0.35    0.87
  -6  -3  14    2.85    1.75
   5   3 -14    1.27    1.46
  -5  -3  14    1.83    1.65
   4   3 -14    2.52    1.51
  -4  -3  14    5.12    1.68
   3   3 -14   19.98    1.94
  -3  -3  14   22.79    2.13
   2   3 -14   39.77    2.36
  -2  -3  14   40.08    2.48
   1   3 -14   14.63    1.61
  -1  -3  14   14.37    1.73
   0   3 -14    0.47    0.86
   0   3 -14    0.25    1.06
   0  -3  14   -0.97    1.23
  -1   3 -14   17.76    1.56
   1  -3  14   13.41    1.50
  -2   3 -14   38.66    1.84
  -2   3 -14   42.90    2.11
   2  -3  14   41.32    1.95
  -3   3 -14   24.74    1.83
  -3   3 -14   23.46    1.76
  -4   3 -14    1.94    0.95
  -4   3 -14    1.80    1.18
  -5   3 -14    3.48    1.44
  -5   3 -14    2.09    0.89
  -6   3 -14    0.91    1.52
  -6  -2  14    5.85    1.82
   5   2 -14   16.50    1.90
  -5  -2  14   15.06    2.06
   4   2 -14   16.05    1.80
  -4  -2  14   13.25    1.89
   3   2 -14   39.06    2.36
  -3  -2  14   41.43    2.52
   2   2 -14    8.74    1.48
  -2  -2  14    6.74    1.57
   1   2 -14   12.89    1.54
  -1  -2  14   11.93    0.90
  -1  -2  14   11.15    1.62
   0   2 -14   10.05    1.36
   0  -2  14   12.64    1.51
  -1   2 -14   12.88    1.38
  -1   2 -14   16.12    1.38
   1  -2  14   13.05    1.48
   1  -2  14   15.10    1.56
  -2   2 -14   11.58    1.29
   2  -2  14    9.88    1.23
   2  -2  14    8.48    1.63
  -3   2 -14   44.35    2.12
  -3   2 -14   41.14    2.01
   3  -2  14   40.11    1.64
   3  -2  14   37.78    2.77
  -4   2 -14   18.83    1.35
  -4   2 -14   16.20    1.66
   4  -2  14   21.12    2.44
  -5   2 -14   14.67    1.82
  -5   2 -14   15.52    1.18
   5  -2  14   21.08    2.58
  -6   2 -14    8.27    1.73
  -6  -1  14   11.88    2.02
   5   1 -14    2.38    1.39
  -5  -1  14    2.97    1.65
   4   1 -14    4.42    1.46
  -4  -1  14    5.12    1.63
   3   1 -14   29.11    2.19
  -3  -1  14   31.38    2.28
   2   1 -14   24.44    1.98
  -2  -1  14   22.53    1.95
   1   1 -14    0.23    1.09
  -1  -1  14    0.12    0.62
  -1  -1  14    1.30    1.29
   0   1 -14   58.80    2.47
   0  -1  14   54.87    2.18
   0  -1  14   54.08    2.43
   0  -1  14   56.23    1.89
   1  -1  14    1.47    1.13
   1  -1  14    0.09    1.05
   1  -1  14    0.51    0.86
   2  -1  14   24.09    1.66
   2  -1  14   24.26    1.97
  -3   1 -14   33.23    1.94
  -3   1 -14   35.18    1.94
   3  -1  14   28.72    2.51
   3  -1  14   32.31    1.55
  -4   1 -14    6.74    1.35
   4  -1  14    6.89    1.98
  -5   1 -14    3.94    0.91
  -5   1 -14    3.69    1.40
   5  -1  14    3.77    1.97
  -6   1 -14   10.17    1.84
   6  -1  14    9.54    2.38
  -6   0  14    0.94    1.68
   5   0 -14   23.99    2.00
  -5   0  14   16.86    2.02
   4   0 -14   12.06    1.70
  -4   0  14   11.65    1.76
   3   0 -14   42.69    2.36
  -3   0  14   40.90    2.45
   2   0 -14   25.30    2.00
  -2   0  14   30.04    2.12
   1   0 -14   18.37    1.62
  -1   0  14   23.08    1.84
   0   0  14   40.62    2.21
   0   0  14   44.33    1.93
   0   0  14   42.20    1.73
   1   0  14   24.69    1.79
   1   0  14   22.25    1.44
   1   0  14   21.32    1.85
   2   0  14   27.35    1.75
   2   0  14   30.16    2.24
  -3   0 -14   42.50    2.05
   3   0  14   40.78    1.73
   3   0  14   43.36    2.80
   4   0  14   13.70    2.18
  -5   0 -14   20.57    1.94
   5   0  14   21.71    2.68
  -6   0 -14    3.16    1.51
   6   0  14    3.50    2.10
  -6   1  14   11.30    1.97
   5  -1 -14   -0.40    1.33
  -5   1  14    3.41    1.54
   4  -1 -14    3.87    1.41
  -4   1  14    8.16    1.64
   3  -1 -14   36.83    2.19
  -3   1  14   33.72    2.34
   2  -1 -14   25.06    1.89
  -2   1  14   26.23    2.10
  -1   1  14    0.23    1.21
  -1   1  14    0.71    0.77
   0   1  14   56.13    2.46
   0   1  14   51.89    2.25
   1   1  14    0.97    1.21
   1   1  14   -0.87    1.03
   1   1  14    0.09    0.85
   2   1  14   25.54    1.76
   2   1  14   26.68    2.11
   3   1  14   26.88    1.59
   3   1  14   31.38    2.53
   4   1  14    2.38    1.84
   5   1  14    2.08    1.91
   6   1  14   13.79    2.53
  -6   2  14    4.67    1.70
   5  -2 -14   14.83    1.77
  -5   2  14    9.68    1.76
   4  -2 -14   16.56    1.77
  -4   2  14   12.83    1.83
   3  -2 -14   32.54    2.16
  -3   2  14   32.48    2.30
  -2   2  14    6.56    1.48
  -1   2  14   14.33    1.67
  -1   2  14   12.30    1.20
   0   2  14    7.35    1.20
   0   2  14   10.53    1.49
   1   2  14   11.04    1.45
   1   2  14   10.65    1.50
   1   2  14    9.64    1.18
   2   2  14    7.28    1.29
   2   2  14    5.46    1.60
   3   2  14   42.63    2.78
   3   2  14   36.10    1.81
   4   2  14   16.74    2.27
   5   2  14   15.44    2.48
   6   2  14    5.02    2.20
  -6   3  14    4.00    1.70
  -5   3  14    2.27    1.56
   4  -3 -14    1.59    1.33
  -4   3  14    3.69    1.55
  -3   3  14   18.97    1.91
  -2   3  14   38.35    2.37
  -1   3  14   14.95    1.71
   0   3  14   -0.23    1.02
   0   3  14    1.86    1.24
   1   3  14   15.87    1.74
   1   3  14   14.56    1.63
   2   3  14   36.35    2.53
   2   3  14   40.27    2.14
   3   3  14   24.28    2.36
   3   3  14   20.74    1.53
   4   3  14    2.26    1.76
   5   3  14    3.23    1.99
   6   3  14    3.53    2.15
  -6   4  14    4.21    1.74
  -5   4  14    1.08    1.55
   4  -4 -14   14.12    1.73
  -4   4  14   10.71    1.78
  -3   4  14    2.06    1.45
  -2   4  14    9.93    1.66
  -1   4  14   34.31    2.25
   0   4  14   22.22    1.88
   1   4  14   36.37    2.37
   1   4  14   33.71    2.17
   2   4  14   10.79    1.50
   2   4  14    8.58    1.69
   3   4  14    0.19    1.11
   3   4  14    0.37    1.55
   4   4  14   13.71    2.34
   5   4  14    0.21    1.91
   6   4  14    4.77    2.18
  -6   5  14    0.03    1.60
  -5   5  14    0.13    1.52
  -4   5  14    3.76    1.57
  -3   5  14   11.10    1.70
  -2   5  14   18.45    1.86
  -1   5  14   27.93    2.24
   0   5  14   13.81    1.72
   1   5  14   25.39    2.09
   2   5  14   20.62    2.20
   2   5  14   26.55    2.06
   3   5  14   11.16    2.02
   3   5  14   14.10    1.56
   4   5  14    3.02    1.91
   5   5  14    3.35    2.05
   6   5  14   -0.25    2.08
  -6   6  14    0.07    1.62
  -5   6  14    5.38    1.72
  -4   6  14    4.67    1.60
  -3   6  14    6.46    1.60
  -2   6  14    3.73    1.54
  -1   6  14   44.55    2.66
   0   6  14    2.97    1.39
   1   6  14   46.48    2.57
   2   6  14    7.62    1.85
   2   6  14    2.65    1.39
   3   6  14    9.70    1.61
   3   6  14    7.00    1.94
   4   6  14    4.11    1.99
   5   6  14    8.51    2.33
   6   6  14   -3.26    2.07
  -6   7  14    7.78    1.92
  -5   7  14    0.27    1.58
  -4   7  14    9.73    1.81
  -3   7  14   17.14    2.03
  -2   7  14   24.53    2.18
  -1   7  14    3.97    1.59
   0   7  14   37.74    2.56
   1   7  14    0.51    1.39
   2   7  14   27.10    2.21
   3   7  14   18.84    1.98
   3   7  14   20.30    2.56
   4   7  14    6.52    2.02
   5   7  14    2.31    2.08
   6   7  14    9.89    2.57
  -5   8  14    7.14    1.81
  -4   8  14    0.64    1.50
  -3   8  14    1.51    1.58
  -2   8  14    6.89    1.78
  -1   8  14   12.65    1.95
   0   8  14    0.11    1.51
   1   8  14   20.14    2.11
   2   8  14    4.75    1.61
   3   8  14    2.43    1.50
   3   8  14   -0.56    1.76
   4   8  14    1.47    1.90
   5   8  14    5.49    2.21
  -5   9  14    2.41    1.75
  -4   9  14   -0.41    1.51
  -3   9  14    3.67    1.69
  -2   9  14   19.51    2.12
  -1   9  14   11.16    1.93
   0   9  14    9.77    1.90
   1   9  14   10.38    1.92
   2   9  14   25.32    2.34
   3   9  14    3.16    1.96
   3   9  14    3.72    1.61
   4   9  14   -0.51    1.99
   5   9  14   -0.45    2.06
  -5  10  14    4.77    1.89
  -4  10  14    1.28    1.68
  -3  10  14    0.05    1.58
  -2  10  14    1.63    1.64
  -1  10  14    6.74    1.84
   0  10  14   15.88    2.10
   1  10  14    3.88    1.69
   2  10  14   -0.44    1.55
   3  10  14    0.89    1.60
   3  10  14   -0.14    1.93
   4  10  14    0.84    2.08
   5  10  14    6.00    2.45
  -4  11  14    6.32    1.94
  -3  11  14   11.60    2.05
  -2  11  14   11.96    2.01
  -1  11  14    8.95    1.99
   0  11  14    0.63    1.78
   1  11  14    3.80    1.79
   2  11  14   16.02    2.28
   3  11  14    9.11    1.93
   4  11  14    5.37    2.26
  -4  12  14   -0.37    1.76
  -3  12  14   11.32    2.08
  -2  12  14    1.79    1.70
  -1  12  14    6.50    1.94
   0  12  14    3.93    2.05
   1  12  14    6.04    1.96
   2  12  14    0.63    1.84
   4  12  14    1.71    2.35
  -3  13  14    1.78    1.82
  -2  13  14    7.87    1.99
  -1  13  14    3.75    2.00
   0  13  14   -2.10    1.90
   1  13  14    8.48    2.22
   2  13  14    5.10    2.04
  -2  14  14    4.62    2.01
  -1  14  14   -1.09    1.89
   0  14  14    2.69    2.06
   1  14  14    2.12    1.99
   2  14  14    4.67    2.04
   0  15  14   -1.90    2.05
   2  14 -15   14.21    2.52
   1  14 -15    1.05    1.92
  -1 -14  15    2.48    2.04
   0  14 -15    4.58    1.93
   0 -14  15    5.10    1.94
  -1  14 -15   -1.25    1.61
  -2  14 -15   19.70    2.34
   3  13 -15    0.84    2.08
  -3 -13  15    0.67    2.02
   2  13 -15   10.36    2.28
  -2 -13  15   13.35    2.38
   1  13 -15    9.55    2.22
  -1 -13  15   11.94    2.26
   0  13 -15    7.19    2.00
   0 -13  15    9.43    2.04
  -1  13 -15    9.74    1.97
  -2  13 -15   12.40    2.02
  -3  13 -15    1.74    1.55
   3  12 -15   -0.40    1.97
  -3 -12  15    0.73    1.96
   2  12 -15   10.64    2.20
  -2 -12  15   15.38    2.39
   1  12 -15    5.42    1.93
  -1 -12  15    3.69    1.92
   0  12 -15    0.87    1.64
   0 -12  15    3.28    1.81
  -1  12 -15    3.69    1.65
   1 -12  15    3.42    1.66
  -2  12 -15   12.65    1.94
  -3  12 -15    2.11    1.50
   4  11 -15    2.42    2.05
  -4 -11  15   -0.63    1.90
   3  11 -15    0.12    1.85
  -3 -11  15    3.14    2.01
   2  11 -15   24.35    2.55
  -2 -11  15   24.88    2.56
   1  11 -15   50.92    3.10
  -1 -11  15   48.63    3.07
   0  11 -15    8.17    1.89
   0 -11  15   12.30    1.92
  -1  11 -15   48.48    2.95
   1 -11  15   47.86    2.75
  -2  11 -15   24.96    2.24
  -3  11 -15    2.28    1.31
  -3  11 -15    1.55    1.40
  -4  11 -15   -2.49    1.27
  -4  11 -15   -1.29    1.31
   4  10 -15    4.87    1.97
  -4 -10  15    1.59    1.86
   3  10 -15    4.91    1.95
  -3 -10  15    4.54    1.97
   2  10 -15   19.78    2.32
  -2 -10  15   17.89    2.28
   1  10 -15    8.48    1.86
  -1 -10  15    8.58    1.91
   0  10 -15    1.29    1.50
   0 -10  15    0.53    1.59
  -1  10 -15   10.60    1.78
   1 -10  15    8.91    1.69
  -2  10 -15   21.61    2.07
  -2  10 -15   20.56    1.64
  -3  10 -15    5.24    1.38
  -3  10 -15    7.48    1.53
  -4  10 -15    1.64    1.39
  -4  10 -15    3.52    1.36
   5   9 -15    1.07    1.95
  -5  -9  15   -0.42    1.90
   4   9 -15    5.10    1.98
  -4  -9  15    4.80    1.99
   3   9 -15    7.24    1.94
  -3  -9  15    7.68    1.99
   2   9 -15   27.28    2.50
  -2  -9  15   28.75    2.57
   1   9 -15    8.26    1.79
  -1  -9  15    8.61    1.92
   0   9 -15   -0.07    1.42
   0  -9  15    0.73    1.50
  -1   9 -15   11.34    1.72
  -1   9 -15   10.03    1.05
   1  -9  15   11.32    1.71
  -2   9 -15   28.14    1.86
  -2   9 -15   27.42    2.15
  -3   9 -15    6.18    1.47
  -3   9 -15    7.34    1.37
  -4   9 -15    4.52    1.47
  -4   9 -15    5.36    1.36
  -5   9 -15   -0.08    1.40
  -5   9 -15   -1.80    1.13
   5   8 -15    9.49    2.13
  -5  -8  15    9.51    2.16
   4   8 -15    3.07    1.83
  -4  -8  15   -0.30    1.77
   3   8 -15    5.31    1.77
  -3  -8  15    2.47    1.82
   2   8 -15    1.75    1.62
  -2  -8  15    3.05    1.72
   1   8 -15   17.47    1.99
  -1  -8  15   20.04    2.21
   0   8 -15   17.21    1.90
   0  -8  15   16.55    1.98
  -1   8 -15   20.37    1.97
  -1   8 -15   20.34    1.30
   1  -8  15   24.19    1.96
  -2   8 -15   -0.31    1.18
  -2   8 -15   -1.24    0.90
   2  -8  15    0.83    1.15
  -3   8 -15    2.21    1.12
  -3   8 -15    1.22    1.18
  -4   8 -15    2.77    1.22
  -4   8 -15    5.91    1.41
  -5   8 -15   13.16    1.89
  -5   8 -15   11.63    1.45
   5   7 -15    2.19    1.74
  -5  -7  15    2.92    1.87
   4   7 -15   -0.50    1.66
  -4  -7  15    1.26    1.74
   3   7 -15    5.80    1.73
  -3  -7  15    3.88    1.78
   2   7 -15    2.01    1.60
  -2  -7  15    2.75    1.72
   1   7 -15    0.89    1.39
  -1  -7  15    2.42    1.56
   0   7 -15  119.28    4.05
   0  -7  15  118.27    4.01
  -1   7 -15    2.19    1.29
  -1   7 -15    2.67    0.79
   1  -7  15    1.73    1.35
  -2   7 -15    1.10    0.97
  -2   7 -15    1.13    1.22
   2  -7  15    3.05    1.20
  -3   7 -15    5.34    1.29
  -3   7 -15    6.45    1.26
  -4   7 -15    0.34    1.07
  -4   7 -15    3.62    1.30
  -5   7 -15    5.68    1.64
  -5   7 -15    6.06    1.16
  -6  -6  15    2.42    1.95
   5   6 -15    5.58    1.82
  -5  -6  15    5.76    1.92
   4   6 -15   14.25    2.00
  -4  -6  15    9.00    1.90
   3   6 -15   -0.89    1.49
  -3  -6  15    1.45    1.63
   2   6 -15    2.42    1.50
  -2  -6  15    3.00    1.63
   1   6 -15   42.77    2.58
  -1  -6  15   43.86    2.61
   0   6 -15   25.37    2.12
   0   6 -15   21.76    1.77
   0  -6  15   28.54    2.19
  -1   6 -15   40.85    1.68
  -1   6 -15   38.52    2.34
   1  -6  15   41.35    2.36
  -2   6 -15    3.77    1.22
  -2   6 -15    4.31    0.99
   2  -6  15    2.37    1.12
  -3   6 -15    0.36    1.08
  -3   6 -15    0.85    1.05
  -4   6 -15   16.91    1.78
  -4   6 -15   17.48    1.53
  -5   6 -15    9.04    1.68
  -5   6 -15    7.72    1.18
  -6  -5  15    5.25    1.95
   5   5 -15   11.61    1.97
  -5  -5  15   12.85    2.12
   4   5 -15    0.50    1.58
  -4  -5  15    3.70    1.67
   3   5 -15   11.32    1.79
  -3  -5  15   11.84    1.93
   2   5 -15    3.50    1.48
  -2  -5  15    4.56    1.61
   1   5 -15   39.81    2.41
  -1  -5  15   44.78    2.57
   0   5 -15   70.35    2.93
   0   5 -15   65.30    2.52
   0  -5  15   66.78    2.87
  -1   5 -15   43.01    2.35
  -1   5 -15   42.89    1.71
   1  -5  15   44.66    2.32
  -2   5 -15    5.22    1.29
  -2   5 -15    6.11    1.05
   2  -5  15    4.25    1.18
  -3   5 -15   12.35    1.46
  -3   5 -15   14.32    1.47
  -4   5 -15    1.84    1.05
  -4   5 -15    3.61    1.28
  -5   5 -15   15.07    1.84
  -5   5 -15   13.68    1.26
  -6  -4  15    1.69    1.83
   5   4 -15   13.91    1.93
  -5  -4  15    9.57    1.90
   4   4 -15   12.38    1.89
  -4  -4  15   11.30    1.96
   3   4 -15    2.28    1.46
  -3  -4  15    1.69    1.66
   2   4 -15    6.34    1.55
  -2  -4  15    8.64    1.78
   1   4 -15   13.59    1.65
  -1  -4  15   14.63    1.88
   0   4 -15   20.96    1.63
   0   4 -15   20.50    1.81
   0  -4  15   24.72    1.99
  -1   4 -15   16.25    1.64
   1  -4  15   17.81    1.72
  -2   4 -15   10.20    1.40
  -2   4 -15   10.65    1.17
   2  -4  15    7.43    1.30
  -3   4 -15    2.79    1.11
  -3   4 -15    1.41    1.04
  -4   4 -15   10.89    1.29
  -4   4 -15    8.19    1.45
  -5   4 -15   10.63    1.18
  -5   4 -15   12.69    1.75
  -6  -3  15    3.58    1.82
   5   3 -15    8.88    1.76
  -5  -3  15    3.43    1.74
   4   3 -15    9.72    1.75
  -4  -3  15    7.72    1.81
   3   3 -15    5.93    1.59
  -3  -3  15    4.95    1.71
   2   3 -15   54.91    2.73
  -2  -3  15   57.98    2.88
   1   3 -15   11.35    1.57
  -1  -3  15   12.39    1.75
   0   3 -15  115.28    3.74
   0   3 -15  119.26    3.41
   0  -3  15  114.87    3.74
  -1   3 -15   15.47    1.57
   1  -3  15   11.96    1.56
  -2   3 -15   56.51    2.47
  -2   3 -15   58.58    2.19
   2  -3  15   58.24    2.33
  -3   3 -15    4.66    1.14
  -3   3 -15    4.43    1.16
  -4   3 -15   11.39    1.52
  -4   3 -15   10.84    1.24
  -5   3 -15    6.71    1.56
  -5   3 -15    7.58    1.07
  -6  -2  15    1.72    1.75
   5   2 -15    2.94    1.53
  -5  -2  15    4.63    1.77
   4   2 -15   17.24    1.93
  -4  -2  15   15.65    1.99
   3   2 -15   11.29    1.69
  -3  -2  15    9.47    1.75
   2   2 -15   34.49    2.28
  -2  -2  15   32.23    2.37
   1   2 -15   45.70    2.41
  -1  -2  15   41.00    2.41
   0   2 -15   24.66    1.80
   0  -2  15   24.60    2.00
  -1   2 -15   45.59    2.27
   1  -2  15   42.57    2.31
   1  -2  15   45.39    2.26
  -2   2 -15   37.37    2.12
   2  -2  15   38.14    2.53
   2  -2  15   37.03    1.98
  -3   2 -15   12.05    1.41
  -3   2 -15   14.79    1.39
   3  -2  15   17.02    2.10
   3  -2  15   14.30    1.17
  -4   2 -15   18.52    1.73
  -4   2 -15   20.32    1.67
   4  -2  15   21.05    2.48
  -5   2 -15    2.97    1.43
  -5   2 -15    1.67    0.92
   5  -2  15    4.17    2.07
  -6  -1  15   -3.12    1.59
   5   1 -15   -0.40    1.37
  -5  -1  15   -0.63    1.55
   4   1 -15    5.54    1.55
  -4  -1  15    3.16    1.61
   3   1 -15    6.41    1.54
  -3  -1  15    7.47    1.64
   2   1 -15   28.24    2.17
  -2  -1  15   32.18    2.28
   1   1 -15   24.00    1.96
  -1  -1  15   19.93    1.87
  -1  -1  15   19.82    1.21
   0   1 -15    4.15    1.17
   0  -1  15    1.46    0.79
   0  -1  15    3.91    1.03
   0  -1  15    2.22    1.23
   1  -1  15   20.50    1.69
   1  -1  15   21.38    1.73
   1  -1  15   18.96    1.37
   2  -1  15   26.54    1.81
   2  -1  15   31.63    2.33
   3  -1  15    8.30    1.83
   3  -1  15    6.09    1.01
  -4   1 -15    2.75    1.24
   4  -1  15    5.33    1.87
  -5   1 -15   -0.20    0.85
  -5   1 -15    0.89    1.34
   5  -1  15    1.92    1.92
   6  -1  15   -0.37    2.13
  -6   0  15   16.09    2.18
   5   0 -15    2.80    1.47
  -5   0  15    4.25    1.70
   4   0 -15   49.96    2.69
   3   0 -15    8.71    1.55
  -3   0  15    9.47    1.67
   2   0 -15    0.82    1.26
  -2   0  15    2.24    1.46
   1   0 -15    1.13    1.18
  -1   0  15    0.11    1.25
   0   0  15   -0.01    0.78
   0   0  15   -0.57    1.14
   0   0  15    0.89    0.98
   1   0  15    0.61    1.18
   1   0  15   -0.06    0.90
   1   0  15   -1.01    1.08
   2   0  15    5.01    1.21
   2   0  15    2.45    1.50
   3   0  15    6.28    1.83
   3   0  15   10.76    1.14
   4   0  15   52.59    3.25
   5   0  15    1.53    1.92
   6   0  15   24.38    3.08
  -6   1  15    1.99    1.67
   5  -1 -15   -0.09    1.37
  -5   1  15   -0.88    1.49
   4  -1 -15    4.25    1.44
  -4   1  15    4.58    1.61
   3  -1 -15    8.59    1.51
  -3   1  15    7.06    1.62
   2  -1 -15   28.61    2.11
  -2   1  15   28.34    2.24
  -1   1  15   19.67    1.39
  -1   1  15   21.56    1.89
   0   1  15    2.91    1.38
   0   1  15    1.55    0.99
   0   1  15    1.59    0.86
   1   1  15   22.41    1.64
   1   1  15   17.28    1.70
   1   1  15   17.92    1.69
   2   1  15   27.80    2.28
   2   1  15   27.18    1.87
   3   1  15    7.06    1.83
   3   1  15    6.99    1.13
   4   1  15    3.02    1.79
   5   1  15   -1.08    1.84
   6   1  15   -0.05    2.03
  -6   2  15    1.23    1.64
  -5   2  15    1.26    1.55
   4  -2 -15   19.03    1.89
  -4   2  15   17.46    1.98
   3  -2 -15   10.31    1.60
  -3   2  15   14.07    1.86
  -2   2  15   34.33    2.30
  -1   2  15   40.59    1.91
  -1   2  15   46.88    2.45
   0   2  15   20.79    1.81
   0   2  15   24.94    2.04
   1   2  15   42.92    2.32
   1   2  15   45.01    2.49
   2   2  15   33.06    2.02
   2   2  15   36.10    2.50
   3   2  15   13.25    1.33
   3   2  15   13.61    2.05
   4   2  15   18.97    2.43
   5   2  15    2.55    2.02
   6   2  15    2.36    2.11
  -6   3  15    2.38    1.67
  -5   3  15    5.07    1.70
   4  -3 -15    9.54    1.62
  -4   3  15    9.61    1.73
  -3   3  15    1.96    1.50
  -2   3  15   56.58    2.85
  -1   3  15   11.13    1.70
   0   3  15  116.05    3.80
   0   3  15  113.90    3.71
   1   3  15    9.46    1.58
   1   3  15    8.58    1.59
   2   3  15   59.74    3.00
   2   3  15   53.31    2.48
   3   3  15    0.94    1.58
   3   3  15    4.75    1.21
   4   3  15   12.64    2.20
   5   3  15    1.03    1.93
   6   3  15    0.08    2.15
  -6   4  15   -1.12    1.59
  -5   4  15    9.92    1.86
   4  -4 -15    8.47    1.65
  -4   4  15    5.99    1.65
  -3   4  15    2.49    1.55
  -2   4  15    6.73    1.68
  -1   4  15    8.60    1.69
   0   4  15   14.19    1.73
   1   4  15   13.72    1.81
   1   4  15   13.13    1.73
   2   4  15    4.83    1.61
   2   4  15   11.40    1.61
   3   4  15   -0.27    1.66
   3   4  15    0.68    1.11
   4   4  15    8.51    2.07
   5   4  15   13.71    2.45
   6   4  15   -0.89    2.14
  -6   5  15    1.67    1.71
  -5   5  15    9.21    1.91
  -4   5  15   -0.57    1.56
  -3   5  15    8.72    1.75
  -2   5  15    3.66    1.59
  -1   5  15   38.64    2.52
   0   5  15   62.01    2.92
   1   5  15   39.93    2.43
   1   5  15   40.87    2.67
   2   5  15    5.14    1.68
   2   5  15    6.91    1.59
   3   5  15   10.87    1.58
   3   5  15   10.83    2.08
   4   5  15    0.87    1.83
   5   5  15    7.53    2.22
   6   5  15    1.77    2.17
  -6   6  15    2.29    1.75
  -5   6  15    5.50    1.79
  -4   6  15   10.77    1.90
  -3   6  15   -0.05    1.46
  -2   6  15    2.82    1.60
  -1   6  15   38.40    2.59
   0   6  15   22.00    2.15
   1   6  15   39.28    2.59
   2   6  15    1.56    1.61
   2   6  15    1.83    1.39
   3   6  15   -0.39    1.66
   3   6  15   -0.29    1.30
   4   6  15    8.32    2.15
   5   6  15    4.73    2.33
   6   6  15    4.51    2.35
  -5   7  15    4.82    1.75
  -4   7  15    1.32    1.57
  -3   7  15    2.86    1.60
  -2   7  15    2.36    1.56
  -1   7  15    0.15    1.59
   0   7  15  111.73    4.03
   1   7  15    0.68    1.45
   2   7  15    3.66    1.51
   2   7  15    0.87    1.67
   3   7  15    3.48    1.47
   3   7  15    4.88    1.97
   4   7  15    1.17    1.90
   5   7  15    2.24    2.18
  -5   8  15    8.35    2.05
  -4   8  15    0.26    1.57
  -3   8  15    1.04    1.59
  -2   8  15   -0.41    1.59
  -1   8  15   16.29    2.10
   0   8  15   16.42    2.08
   1   8  15   17.83    2.14
   2   8  15   -0.13    1.50
   3   8  15    1.58    1.55
   3   8  15    0.93    1.89
   4   8  15    0.68    1.98
   5   8  15    5.50    2.35
  -5   9  15   -1.49    1.64
  -4   9  15    3.85    1.77
  -3   9  15    4.71    1.78
  -2   9  15   19.72    2.24
  -1   9  15    7.23    1.82
   0   9  15   -0.07    1.61
   1   9  15    9.18    1.97
   2   9  15   25.40    2.42
   3   9  15    7.07    2.08
   3   9  15    4.99    1.71
   4   9  15    3.86    2.17
   5   9  15   -0.15    2.15
  -4  10  15    2.55    1.73
  -3  10  15    1.50    1.72
  -2  10  15   15.69    2.13
  -1  10  15    7.83    1.91
   0  10  15    4.32    1.94
   1  10  15    2.90    1.71
   2  10  15    8.25    1.86
   3  10  15    1.57    2.07
   3  10  15    8.00    2.02
   4  10  15    1.51    2.18
  -4  11  15    0.69    1.82
  -3  11  15    1.82    1.73
  -2  11  15   14.22    2.17
   0  11  15    7.91    2.07
   1  11  15   38.58    2.93
   2  11  15   16.46    2.38
   3  11  15    0.01    2.14
   4  11  15    1.38    2.26
  -3  12  15    2.30    1.82
  -2  12  15    7.81    2.05
  -1  12  15    3.96    1.94
   0  12  15    2.54    1.92
   1  12  15    2.57    1.83
   2  12  15    6.97    2.02
  -3  13  15    1.10    1.80
  -2  13  15    8.06    2.10
  -1  13  15    8.87    2.21
   0  13  15    4.65    2.13
   1  13  15    5.71    2.07
   2  13  15    4.81    2.02
  -2  14  15    8.84    2.22
  -1  14  15   -1.86    1.79
   0  14  15    1.97    2.14
   1  14  15    1.19    2.03
   1  14 -16    4.33    2.06
  -1 -14  16    6.38    2.17
   0  14 -16    1.14    1.83
   0 -14  16    2.39    1.89
  -1  14 -16    6.50    2.00
   2  13 -16   12.26    2.45
  -2 -13  16   13.11    2.40
   1  13 -16   -0.07    1.87
  -1 -13  16    3.02    1.97
   0  13 -16   19.52    2.41
   0 -13  16   22.40    2.46
  -1  13 -16    2.00    1.70
  -2  13 -16   13.97    2.09
   3  12 -16    5.96    2.16
  -3 -12  16    7.28    2.25
   2  12 -16    2.39    1.96
  -2 -12  16   -1.49    1.93
   1  12 -16    2.77    1.79
  -1 -12  16    2.99    1.89
   0  12 -16   12.76    2.08
   0 -12  16   14.11    2.22
  -1  12 -16    7.21    1.83
  -2  12 -16    3.05    1.59
  -3  12 -16    9.76    1.84
   4  11 -16   -0.73    1.97
  -4 -11  16   -0.50    1.86
   3  11 -16    1.48    1.90
  -3 -11  16   -0.67    1.87
   2  11 -16   19.33    2.44
  -2 -11  16   16.77    2.38
   1  11 -16   11.32    2.12
  -1 -11  16   13.74    2.25
   0  11 -16    6.11    1.76
   0 -11  16    9.03    1.92
  -1  11 -16   14.46    2.05
   1 -11  16   15.37    2.03
  -2  11 -16   16.97    2.07
  -3  11 -16    3.70    1.50
  -4  11 -16    1.89    1.42
  -4  11 -16    2.66    1.44
   4  10 -16    5.01    2.02
  -4 -10  16    6.30    2.12
   3  10 -16   15.71    2.28
  -3 -10  16   18.30    2.49
   2  10 -16    1.17    1.71
  -2 -10  16    0.81    1.80
   1  10 -16    7.13    1.79
  -1 -10  16    5.73    1.94
   0  10 -16    2.81    1.59
   0 -10  16    4.91    1.75
  -1  10 -16    8.21    1.69
   1 -10  16    7.15    1.68
  -2  10 -16    0.78    1.37
  -3  10 -16   20.29    2.01
  -3  10 -16   17.99    1.77
  -4  10 -16    8.02    1.59
  -4  10 -16    8.42    1.58
   4   9 -16    7.78    2.02
  -4  -9  16    5.42    1.99
   3   9 -16   -0.94    1.64
  -3  -9  16    0.22    1.90
   2   9 -16    6.85    1.84
  -2  -9  16    7.85    1.97
   1   9 -16    7.05    1.82
  -1  -9  16    7.26    1.92
   0   9 -16    0.93    1.44
   0  -9  16    2.95    1.63
  -1   9 -16    7.93    1.64
   1  -9  16   10.29    1.72
  -2   9 -16    8.09    1.19
  -2   9 -16    6.39    1.54
  -3   9 -16    1.42    1.11
  -3   9 -16   -0.36    1.23
  -4   9 -16    3.32    1.43
  -4   9 -16    5.16    1.36
   5   8 -16    2.91    1.97
  -5  -8  16   -2.68    1.83
   4   8 -16    9.41    2.03
  -4  -8  16   11.20    2.16
   3   8 -16    0.61    1.66
  -3  -8  16    1.07    1.77
   2   8 -16   11.45    1.98
  -2  -8  16   12.24    2.08
   1   8 -16   11.54    1.87
  -1  -8  16   16.78    2.09
   0   8 -16   68.10    3.16
   0  -8  16   65.93    3.13
  -1   8 -16   15.53    1.12
  -1   8 -16   17.52    1.93
   1  -8  16   11.01    1.71
  -2   8 -16   12.37    1.33
  -2   8 -16   11.21    1.67
  -3   8 -16    2.73    1.24
  -3   8 -16    1.41    1.15
  -4   8 -16   10.18    1.64
  -4   8 -16    8.46    1.44
  -5   8 -16    6.20    1.67
   5   7 -16    3.73    1.93
  -5  -7  16    4.09    1.93
   4   7 -16    8.26    1.93
  -4  -7  16    6.58    1.96
   3   7 -16    0.43    1.60
  -3  -7  16   -1.91    1.68
   2   7 -16    0.55    1.53
  -2  -7  16    0.48    1.70
   1   7 -16   43.07    2.69
  -1  -7  16   42.53    2.76
   0   7 -16   30.89    2.36
   0  -7  16   30.45    2.33
  -1   7 -16   36.06    2.45
  -1   7 -16   40.08    1.70
   1  -7  16   41.97    2.43
  -2   7 -16   -1.48    1.17
  -2   7 -16   -0.41    0.90
   2  -7  16   -1.28    1.10
  -3   7 -16    0.84    1.08
  -3   7 -16    0.91    1.13
  -4   7 -16    7.38    1.33
  -4   7 -16    7.23    1.46
  -5   7 -16    9.12    1.70
  -5   7 -16    5.39    1.22
   5   6 -16    2.84    1.74
  -5  -6  16    3.69    1.89
   4   6 -16   18.24    2.16
  -4  -6  16   16.14    2.17
   3   6 -16    6.65    1.75
  -3  -6  16    5.15    1.80
   2   6 -16   52.38    2.94
  -2  -6  16   54.34    2.97
   1   6 -16   10.80    1.72
  -1  -6  16   10.46    1.82
   0   6 -16    0.79    1.30
   0  -6  16   -0.15    1.43
  -1   6 -16    8.24    0.94
  -1   6 -16    8.04    1.48
   1  -6  16    9.45    1.63
  -2   6 -16   53.13    2.21
  -2   6 -16   53.90    2.59
   2  -6  16   55.50    2.45
  -3   6 -16    7.41    1.27
  -3   6 -16    7.15    1.35
  -4   6 -16   19.43    1.63
  -4   6 -16   19.06    1.83
  -5   6 -16    6.98    1.63
  -5   6 -16    6.38    1.17
   5   5 -16    5.52    1.74
  -5  -5  16    4.80    1.88
   4   5 -16    5.59    1.76
  -4  -5  16    4.72    1.79
   3   5 -16    3.90    1.62
  -3  -5  16    3.30    1.69
   2   5 -16   97.14    3.69
  -2  -5  16   96.10    3.77
   1   5 -16   60.17    2.94
  -1  -5  16   64.64    3.04
   0   5 -16   14.30    1.25
   0   5 -16   11.09    1.69
   0  -5  16   13.33    1.81
  -1   5 -16   63.49    2.77
   1  -5  16   58.60    2.70
  -2   5 -16   93.33    2.91
  -2   5 -16   96.67    3.39
   2  -5  16   94.10    3.13
  -3   5 -16    3.67    1.24
  -3   5 -16    2.85    1.11
  -4   5 -16    5.98    1.20
  -4   5 -16    6.51    1.42
  -5   5 -16    5.87    1.14
  -5   5 -16    6.72    1.58
  -6  -4  16    9.09    2.08
   5   4 -16    7.78    1.83
  -5  -4  16    5.67    1.87
   4   4 -16    4.09    1.69
  -4  -4  16    6.47    1.86
   3   4 -16   33.19    2.44
  -3  -4  16   35.94    2.65
   2   4 -16    0.75    1.45
  -2  -4  16    0.36    1.61
   1   4 -16    6.11    1.50
  -1  -4  16    5.05    1.60
   0   4 -16   -0.85    0.92
   0   4 -16    0.74    1.27
   0  -4  16    1.13    1.32
  -1   4 -16    3.84    1.35
   1  -4  16    7.71    1.51
  -2   4 -16    0.02    0.89
  -2   4 -16    1.31    1.17
   2  -4  16    1.00    1.15
  -3   4 -16   33.71    2.10
  -3   4 -16   34.27    2.12
  -4   4 -16    3.48    1.29
  -4   4 -16    5.57    1.20
  -5   4 -16    8.13    1.16
  -5   4 -16    7.15    1.58
  -6  -3  16    3.61    1.89
   5   3 -16    4.73    1.68
  -5  -3  16    4.93    1.78
   4   3 -16   15.54    1.94
  -4  -3  16   15.47    2.12
   3   3 -16   15.11    1.89
  -3  -3  16    9.80    1.93
   2   3 -16   61.40    2.93
  -2  -3  16   64.65    3.05
   1   3 -16   23.00    1.97
  -1  -3  16   24.62    2.13
   0   3 -16    2.27    0.97
   0   3 -16   -0.45    1.16
   0  -3  16    1.89    1.36
  -1   3 -16   28.61    2.04
   1  -3  16   24.79    1.95
  -2   3 -16   64.70    2.71
   2  -3  16   63.47    2.50
  -3   3 -16   13.62    1.48
  -3   3 -16   14.08    1.46
  -4   3 -16   19.95    1.81
  -4   3 -16   19.52    1.55
  -5   3 -16    4.13    1.53
  -5   3 -16    2.97    1.00
  -6  -2  16    1.08    1.77
   5   2 -16    1.00    1.52
  -5  -2  16    2.25    1.70
   4   2 -16    1.90    1.55
  -4  -2  16    1.72    1.65
   3   2 -16   49.99    2.72
  -3  -2  16   49.26    2.87
   2   2 -16   15.93    1.79
  -2  -2  16   14.84    1.96
   1   2 -16    5.53    1.42
  -1  -2  16    6.29    0.70
  -1  -2  16    5.34    1.61
   0   2 -16    2.40    1.22
   0  -2  16    2.51    1.33
  -1   2 -16    8.70    1.39
   1  -2  16    8.98    1.48
   1  -2  16    7.37    1.48
  -2   2 -16   19.29    1.64
   2  -2  16   14.67    1.91
   2  -2  16   17.28    1.59
  -3   2 -16   53.50    2.40
   3  -2  16   56.14    3.17
  -4   2 -16    3.35    1.29
  -4   2 -16    2.43    1.05
   4  -2  16    5.00    1.91
  -5   2 -16    2.66    1.01
  -5   2 -16    4.14    1.46
   5  -2  16    4.02    2.12
  -6  -1  16    4.47    1.85
   5   1 -16    3.58    1.50
  -5  -1  16    5.35    1.73
   4   1 -16    3.51    1.52
  -4  -1  16    2.91    1.63
   3   1 -16   -0.16    1.41
  -3  -1  16    2.21    1.59
   2   1 -16   16.75    1.77
  -2  -1  16   14.24    1.84
   1   1 -16   54.91    2.65
  -1  -1  16   58.49    2.79
  -1  -1  16   61.82    1.84
   0   1 -16    4.92    1.27
   0  -1  16    2.97    1.05
   0  -1  16    3.11    0.86
   0  -1  16    4.10    1.45
   1  -1  16   65.22    2.42
   1  -1  16   66.43    2.72
   1  -1  16   62.89    2.74
   2  -1  16   18.38    1.60
   2  -1  16   17.81    1.98
   3  -1  16    2.60    1.58
   4  -1  16    0.75    1.76
  -5   1 -16    8.19    1.14
   5  -1  16    5.70    2.12
   6  -1  16    7.12    2.39
  -6   0  16    7.24    1.92
   5   0 -16    3.45    1.61
  -5   0  16    4.76    1.69
   4   0 -16   20.06    1.98
  -4   0  16   14.74    1.95
   3   0 -16   -0.18    1.37
  -3   0  16    0.59    1.50
   2   0 -16    4.79    1.44
  -2   0  16    3.87    1.60
   1   0 -16    7.17    1.41
  -1   0  16    7.86    1.69
   0   0  16   33.83    1.69
   0   0  16   32.38    2.20
   0   0  16   33.80    1.90
   1   0  16    4.94    1.35
   1   0  16    7.82    1.13
   1   0  16    6.68    1.43
   2   0  16    5.05    1.31
   2   0  16    0.72    1.54
   3   0  16    3.57    1.73
   3   0  16   -0.03    0.96
   4   0  16   22.60    2.54
   5   0  16    4.76    2.11
   6   0  16   15.96    2.79
  -6   1  16    1.61    1.73
   5  -1 -16    7.51    1.66
  -5   1  16    7.67    1.79
   4  -1 -16   -0.18    1.34
  -4   1  16   -0.68    1.49
   3  -1 -16    1.00    1.35
  -3   1  16    1.34    1.47
   2  -1 -16   14.44    1.68
  -2   1  16   15.74    1.92
  -1   1  16   59.24    2.83
  -1   1  16   60.23    2.13
   0   1  16    2.30    0.92
   0   1  16    2.42    1.35
   0   1  16    1.04    1.07
   1   1  16   62.66    2.81
   1   1  16   60.00    2.68
   1   1  16   66.80    2.49
   2   1  16   17.27    1.99
   2   1  16   21.03    1.69
   3   1  16    1.88    1.05
   3   1  16    1.50    1.54
   4   1  16    0.03    1.74
   5   1  16    4.41    2.01
   6   1  16    4.32    2.40
  -6   2  16   -1.37    1.63
  -5   2  16    3.72    1.65
   4  -2 -16    4.72    1.52
  -4   2  16    0.94    1.55
   3  -2 -16   55.53    2.68
  -3   2  16   50.63    2.82
  -2   2  16   12.85    1.82
  -1   2  16    3.44    1.00
  -1   2  16    6.03    1.64
   0   2  16    3.31    1.41
   0   2  16    3.37    1.16
   1   2  16    6.00    1.49
   1   2  16    7.54    1.50
   2   2  16   16.50    1.99
   2   2  16   16.96    1.66
   3   2  16   47.81    3.06
   3   2  16   48.14    2.13
   4   2  16    1.88    1.84
   5   2  16    1.33    1.95
   6   2  16    4.75    2.28
  -6   3  16    4.04    1.78
  -5   3  16    4.10    1.68
   4  -3 -16   19.49    1.96
  -4   3  16   15.76    2.00
   3  -3 -16   12.49    1.77
  -3   3  16   10.21    1.86
  -2   3  16   54.71    2.84
  -1   3  16   20.35    2.05
  -1   3  16   23.09    1.84
   0   3  16   -0.35    1.31
   0   3  16    3.97    1.26
   1   3  16   23.17    1.98
   1   3  16   21.58    1.98
   2   3  16   66.07    3.19
   2   3  16   56.61    2.66
   3   3  16   13.61    1.48
   3   3  16    7.92    1.94
   4   3  16   18.41    2.47
   5   3  16    5.10    2.10
   6   3  16    3.70    2.25
  -6   4  16    7.58    1.89
  -5   4  16    5.86    1.74
   4  -4 -16    6.80    1.60
  -4   4  16    2.59    1.59
  -3   4  16   25.53    2.28
  -2   4  16    0.45    1.58
  -1   4  16    5.54    1.68
   0   4  16   -1.02    1.33
   0   4  16    0.13    1.23
   1   4  16    6.51    1.58
   1   4  16    4.89    1.62
   2   4  16    0.52    1.56
   2   4  16   -0.05    1.29
   3   4  16   32.04    2.11
   3   4  16   32.94    2.89
   4   4  16    5.75    2.05
   5   4  16    1.31    2.00
   6   4  16    7.59    2.48
  -5   5  16    4.89    1.78
   4  -5 -16    6.58    1.71
  -4   5  16    7.35    1.75
  -3   5  16    2.58    1.60
  -1   5  16   54.60    2.90
   0   5  16   10.39    1.84
   1   5  16   55.86    2.84
   1   5  16   58.59    3.07
   2   5  16   94.40    3.48
   2   5  16   96.02    4.01
   3   5  16    1.24    1.73
   3   5  16    1.81    1.30
   4   5  16    7.61    2.06
   5   5  16    4.13    2.16
  -5   6  16    3.56    1.73
  -4   6  16   11.74    1.93
  -3   6  16    5.11    1.70
  -2   6  16   49.51    2.88
  -1   6  16    6.48    1.76
   0   6  16   -0.55    1.43
   1   6  16   10.36    1.88
   2   6  16   54.80    3.30
   2   6  16   56.21    2.87
   3   6  16    2.16    1.40
   3   6  16    5.08    1.92
   4   6  16   16.71    2.52
   5   6  16    2.48    2.18
  -5   7  16    1.70    1.71
  -4   7  16    7.06    1.83
  -3   7  16   -1.01    1.57
  -2   7  16   -0.03    1.59
  -1   7  16   31.96    2.61
   0   7  16   29.24    2.45
   1   7  16   34.02    2.62
   2   7  16   -0.05    1.48
   2   7  16   -1.06    1.64
   3   7  16    1.73    1.49
   3   7  16    0.99    1.91
   4   7  16    3.32    2.05
   5   7  16    2.76    2.22
  -5   8  16    1.80    1.74
  -4   8  16    4.39    1.74
  -3   8  16    0.14    1.59
  -2   8  16    8.95    1.95
  -1   8  16    9.42    1.92
   0   8  16   57.55    3.12
   1   8  16    7.10    1.76
   2   8  16    8.74    2.07
   2   8  16   10.44    2.01
   3   8  16   -0.40    1.52
   3   8  16   -0.69    1.84
   4   8  16    8.64    2.25
   5   8  16    4.36    2.39
  -4   9  16    3.77    1.82
  -3   9  16   -0.84    1.61
  -2   9  16    4.95    1.80
  -1   9  16    5.06    1.87
   0   9  16    2.63    1.72
   1   9  16    4.81    1.75
   2   9  16    5.58    1.82
   3   9  16    0.59    1.97
   4   9  16    3.78    2.26
  -4  10  16    0.74    1.73
  -3  10  16    8.30    1.96
  -2  10  16   -1.88    1.67
  -1  10  16    5.09    1.93
   0  10  16    0.72    1.69
   1  10  16    2.70    1.80
   2  10  16    0.97    1.70
   3  10  16   13.48    2.54
   4  10  16    3.51    2.25
  -4  11  16    0.75    1.78
  -3  11  16   -2.04    1.67
  -2  11  16   11.50    2.18
  -1  11  16   11.09    2.14
   0  11  16    6.43    2.07
   1  11  16    9.13    2.20
   2  11  16    8.86    2.07
   3  11  16    3.86    2.31
   4  11  16    1.15    2.22
  -3  12  16    7.25    2.05
  -2  12  16    0.58    1.80
  -1  12  16    3.92    2.04
   0  12  16    9.15    2.21
   1  12  16    2.55    1.97
   2  12  16    4.12    1.98
   3  12  16    6.03    2.38
  -2  13  16    3.82    2.04
  -1  13  16    1.11    1.98
   0  13  16   17.32    2.48
   1  13  16   -0.01    1.93
   2  13  16    8.43    2.15
  -1  14  16    3.66    2.18
   0  14  16    0.73    2.11
   1  14  16    2.48    2.04
   1  13 -17    1.64    1.94
  -1 -13  17    5.43    2.08
   0  13 -17    4.92    1.89
   0 -13  17    4.96    1.98
  -1  13 -17    5.56    1.86
  -2  13 -17    1.90    1.70
   3  12 -17   -1.49    1.95
   2  12 -17    4.86    2.12
  -2 -12  17    8.72    2.17
   1  12 -17    1.54    1.83
  -1 -12  17    3.07    1.99
   0  12 -17    1.44    1.70
   0 -12  17    1.51    1.82
  -1  12 -17    3.23    1.72
  -2  12 -17    8.41    1.86
   3  11 -17   -0.08    1.91
  -3 -11  17    4.97    2.16
   2  11 -17    1.34    1.85
  -2 -11  17   -1.74    1.89
   1  11 -17    3.82    1.90
  -1 -11  17    3.38    1.96
   0  11 -17   -0.51    1.62
   0 -11  17   -0.87    1.67
  -1  11 -17    7.44    1.81
   1 -11  17    4.58    1.72
  -2  11 -17    0.32    1.43
  -3  11 -17    5.34    1.60
   4  10 -17   12.96    2.33
  -4 -10  17   10.67    2.38
   3  10 -17   11.26    2.23
  -3 -10  17   12.31    2.35
   2  10 -17   -1.37    1.67
  -2 -10  17    1.50    1.88
   1  10 -17   16.67    2.25
  -1 -10  17   19.96    2.33
   0  10 -17    7.02    1.83
   0 -10  17    6.23    1.84
  -1  10 -17   16.66    2.06
   1 -10  17   19.79    2.08
  -2  10 -17    3.44    1.54
  -3  10 -17   15.27    1.86
  -4  10 -17   13.02    1.77
  -4  10 -17   16.52    1.87
   4   9 -17    1.37    1.95
  -4  -9  17    0.57    1.88
   3   9 -17    9.42    2.09
  -3  -9  17    8.51    2.23
   2   9 -17   -0.59    1.67
  -2  -9  17    0.90    1.89
   1   9 -17    4.79    1.69
  -1  -9  17    5.78    1.99
   0   9 -17   -1.82    1.38
   0  -9  17    2.58    1.66
  -1   9 -17    5.21    1.56
   1  -9  17    6.18    1.62
  -2   9 -17    1.06    1.36
  -3   9 -17   12.12    1.56
  -3   9 -17    9.37    1.63
  -4   9 -17    1.17    1.27
  -4   9 -17    2.22    1.33
  -5  -8  17    5.81    2.11
   4   8 -17    1.30    1.83
  -4  -8  17    2.41    1.91
   3   8 -17    9.58    2.02
  -3  -8  17    9.16    2.12
   2   8 -17   14.18    2.06
  -2  -8  17   11.85    2.12
   1   8 -17    0.25    1.55
  -1  -8  17    1.72    1.78
   0   8 -17    0.73    1.43
   0  -8  17    2.41    1.64
  -1   8 -17    0.47    1.40
   1  -8  17    1.49    1.45
  -2   8 -17   14.94    1.35
  -2   8 -17   12.21    1.71
  -3   8 -17   10.00    1.42
  -3   8 -17    9.13    1.57
  -4   8 -17    3.96    1.44
  -4   8 -17    7.90    1.39
   5   7 -17    0.42    1.82
  -5  -7  17    0.23    1.88
   4   7 -17    1.14    1.80
  -4  -7  17    1.25    1.84
   3   7 -17    6.29    1.82
  -3  -7  17    6.46    2.00
   2   7 -17    6.54    1.82
  -2  -7  17    9.15    2.00
   1   7 -17    0.51    1.52
  -1  -7  17    0.21    1.65
   0   7 -17    7.54    1.69
   0  -7  17    7.58    1.79
  -1   7 -17    1.26    0.75
  -1   7 -17    2.24    1.42
   1  -7  17    0.30    1.43
  -2   7 -17    9.68    1.61
  -2   7 -17    9.12    1.20
  -3   7 -17    5.98    1.29
  -3   7 -17    7.01    1.41
  -4   7 -17    2.87    1.34
  -4   7 -17    2.83    1.21
  -5   7 -17    3.22    1.54
   5   6 -17    6.24    1.92
  -5  -6  17    7.79    2.04
   4   6 -17    0.87    1.66
  -4  -6  17   -0.67    1.71
   3   6 -17    3.70    1.72
  -3  -6  17    5.05    1.86
   2   6 -17    1.21    1.55
  -2  -6  17   -0.33    1.69
   1   6 -17    7.44    1.66
  -1  -6  17    8.00    1.84
   0   6 -17    9.50    1.67
   0  -6  17    9.40    1.83
  -1   6 -17   11.20    1.67
   1  -6  17    9.62    1.66
  -2   6 -17    2.42    1.29
  -2   6 -17    1.89    0.97
   2  -6  17    1.19    1.20
  -3   6 -17    4.07    1.24
  -3   6 -17    5.50    1.23
  -4   6 -17    1.07    1.23
  -4   6 -17    0.89    1.09
  -5   6 -17   11.76    1.78
  -5   6 -17    7.23    1.28
   5   5 -17    0.57    1.60
  -5  -5  17   -0.37    1.75
   4   5 -17    3.44    1.72
  -4  -5  17    1.85    1.71
   3   5 -17   -0.22    1.48
  -3  -5  17    0.89    1.70
   2   5 -17   30.72    2.48
  -2  -5  17   31.05    2.57
   1   5 -17    9.93    1.73
  -1  -5  17    7.44    1.79
   0   5 -17   20.15    1.99
   0  -5  17   23.47    2.18
  -1   5 -17    7.47    1.50
   1  -5  17   10.75    1.68
  -2   5 -17   31.54    2.21
  -2   5 -17   31.62    1.83
   2  -5  17   27.71    2.02
  -3   5 -17   -0.61    1.12
  -3   5 -17    0.28    1.06
  -4   5 -17    2.35    1.08
  -4   5 -17    4.19    1.34
  -5   5 -17    0.48    1.39
  -5   5 -17    0.76    1.01
   5   4 -17   12.36    2.03
  -5  -4  17   15.13    2.18
   4   4 -17    6.49    1.79
  -4  -4  17    7.04    1.92
   3   4 -17   11.36    1.83
  -3  -4  17   10.59    1.98
   2   4 -17    3.38    1.58
  -2  -4  17    3.17    1.72
   1   4 -17   56.78    2.80
  -1  -4  17   50.26    2.83
   0   4 -17    9.13    1.56
   0  -4  17    7.73    1.70
  -1   4 -17   56.11    2.65
   1  -4  17   50.74    2.62
  -2   4 -17    7.09    1.41
   2  -4  17    4.62    1.34
  -3   4 -17   13.46    1.54
  -3   4 -17   14.58    1.51
  -4   4 -17    7.03    1.48
  -4   4 -17    5.92    1.24
  -5   4 -17   16.01    1.94
  -5   4 -17   15.15    1.40
  -6  -3  17    4.96    1.98
   5   3 -17   12.73    1.98
  -5  -3  17   11.28    2.08
   4   3 -17   13.37    1.86
  -4  -3  17    9.10    1.94
   3   3 -17   18.82    2.05
  -3  -3  17   17.30    2.11
   2   3 -17   11.13    1.71
  -2  -3  17   11.56    1.99
   1   3 -17   22.04    2.01
  -1  -3  17   26.13    2.29
   0   3 -17    1.97    1.30
   0  -3  17    2.37    1.44
  -1   3 -17   22.00    1.92
   1  -3  17   26.12    2.05
  -2   3 -17   11.39    1.52
   2  -3  17    9.53    1.48
  -3   3 -17   23.35    1.79
  -4   3 -17   14.11    1.47
  -4   3 -17   13.26    1.63
  -5   3 -17   13.88    1.36
  -5   3 -17   16.75    1.93
  -6  -2  17    2.72    1.82
   5   2 -17   11.65    1.93
  -5  -2  17    8.06    1.92
   4   2 -17   31.72    2.45
  -4  -2  17   26.17    2.39
   3   2 -17    2.35    1.53
  -3  -2  17    6.12    1.79
   2   2 -17   24.79    2.13
  -2  -2  17   27.11    2.33
   1   2 -17    5.29    1.48
  -1  -2  17    4.74    0.71
  -1  -2  17    3.22    1.60
   0   2 -17    0.81    1.21
   0  -2  17    0.01    1.31
  -1   2 -17    5.07    1.32
   1  -2  17    4.17    1.41
   1  -2  17    4.82    1.41
  -2   2 -17   25.84    2.03
   2  -2  17   25.13    1.96
   2  -2  17   30.44    2.38
  -3   2 -17    4.77    1.26
   3  -2  17    5.37    1.81
  -4   2 -17   30.75    2.04
   4  -2  17   38.49    3.10
  -5   2 -17    7.88    1.60
  -5   2 -17   11.55    1.29
   5  -2  17   10.88    2.48
  -6  -1  17    1.83    1.82
   5   1 -17    9.31    1.84
  -5  -1  17    5.35    1.83
   4   1 -17   28.12    2.28
  -4  -1  17   24.24    2.32
   3   1 -17    5.33    1.58
  -3  -1  17    8.50    1.87
   2   1 -17   16.86    1.91
  -2  -1  17   19.72    2.15
   1   1 -17    7.73    1.49
  -1  -1  17    5.04    0.82
  -1  -1  17    6.31    1.68
   0   1 -17    4.28    1.30
   0  -1  17    3.35    1.05
   0  -1  17    3.30    0.87
   0  -1  17    4.25    1.58
  -1   1 -17    5.81    1.38
   1  -1  17    7.41    1.51
   1  -1  17    8.29    1.19
   1  -1  17    7.85    1.51
   2  -1  17   20.61    1.77
   2  -1  17   22.47    2.15
   3  -1  17    2.79    1.74
  -4   1 -17   32.43    2.06
   4  -1  17   37.33    3.10
  -5   1 -17   12.32    1.31
   5  -1  17   11.14    2.43
   6  -1  17   -0.22    2.13
  -6   0  17    1.94    1.84
   5   0 -17    0.89    1.53
  -5   0  17    0.18    1.65
   4   0 -17   15.14    1.90
  -4   0  17   11.35    1.94
   3   0 -17   23.09    2.05
  -3   0  17   20.06    2.15
   2   0 -17    8.66    1.62
  -2   0  17    9.47    1.80
   1   0 -17    0.00    1.28
  -1   0  17   -0.07    1.51
  -1   0  17    1.29    0.81
   0   0  17   -1.18    1.29
   0   0  17    0.32    1.00
   0   0  17    0.01    0.86
   1   0  17   -0.64    0.93
   1   0  17    1.60    1.24
   1   0  17   -1.61    1.20
   2   0  17    5.20    1.64
   2   0  17    8.56    1.48
   3   0  17   28.19    2.60
   4   0  17   16.14    2.39
   5   0  17    0.53    2.03
   6   0  17    4.99    2.43
  -6   1  17   -1.95    1.65
  -5   1  17    8.55    1.86
   4  -1 -17   29.78    2.40
  -4   1  17   32.67    2.56
   3  -1 -17    6.06    1.58
  -3   1  17    4.20    1.68
   2  -1 -17   19.56    1.96
  -2   1  17   19.63    2.07
  -1   1  17    2.51    1.54
   0   1  17    3.18    1.17
   0   1  17    6.23    1.68
   0   1  17    5.81    1.05
   1   1  17    4.16    1.38
   1   1  17    8.46    1.60
   2   1  17   18.10    1.73
   2   1  17   20.22    2.14
   3   1  17    0.32    1.63
   4   1  17   35.49    3.05
   5   1  17   12.74    2.52
   6   1  17   -0.58    2.27
  -6   2  17    1.83    1.78
  -5   2  17    9.04    1.84
   4  -2 -17   28.56    2.25
  -4   2  17   22.05    2.20
   3  -2 -17    3.05    1.49
  -3   2  17    4.26    1.73
  -2   2  17   24.16    2.19
  -1   2  17    0.91    1.46
  -1   2  17    3.13    1.00
   0   2  17    0.04    1.18
   0   2  17    1.11    1.38
   1   2  17    1.51    1.36
   1   2  17    7.15    1.60
   2   2  17   27.07    2.32
   2   2  17   24.86    2.05
   3   2  17    2.76    1.65
   4   2  17   32.78    2.99
   5   2  17   13.91    2.55
   6   2  17   -1.71    2.21
  -6   3  17    1.83    1.73
  -5   3  17    7.81    1.86
   4  -3 -17   11.21    1.80
  -4   3  17    9.12    1.81
   3  -3 -17   16.65    1.90
  -3   3  17   13.84    2.00
  -2   3  17    8.35    1.83
  -1   3  17   22.44    1.68
  -1   3  17   24.24    2.23
   0   3  17   -0.62    1.18
   0   3  17    2.18    1.44
   1   3  17   21.17    2.02
   1   3  17   19.96    1.98
   2   3  17    6.76    1.73
   2   3  17    5.80    1.46
   3   3  17   17.95    2.33
   4   3  17   13.52    2.33
   5   3  17    7.98    2.30
   6   3  17    0.07    2.21
  -5   4  17   14.19    2.08
   4  -4 -17    7.41    1.70
  -4   4  17    4.33    1.71
  -3   4  17   10.80    1.95
  -2   4  17    6.09    1.81
  -1   4  17   47.57    2.80
   0   4  17    9.40    1.82
   0   4  17    5.21    1.43
   1   4  17   53.65    2.91
   1   4  17   51.11    2.76
   2   4  17    5.84    1.71
   2   4  17    2.40    1.45
   3   4  17   13.06    2.23
   4   4  17    2.67    1.98
   5   4  17   15.76    2.68
  -5   5  17   -0.21    1.56
   4  -5 -17    5.03    1.68
  -4   5  17    0.99    1.61
  -3   5  17   -0.43    1.62
  -2   5  17   27.35    2.39
  -1   5  17    7.49    1.84
   0   5  17   16.11    1.98
   1   5  17    6.78    1.68
   1   5  17    8.56    1.84
   2   5  17   28.53    2.35
   2   5  17   27.06    2.52
   3   5  17   -0.54    1.78
   4   5  17    4.19    2.03
   5   5  17    2.33    2.18
  -5   6  17    8.51    1.90
  -4   6  17    0.54    1.67
  -3   6  17    4.11    1.74
  -2   6  17    2.67    1.70
  -1   6  17    6.36    1.86
   0   6  17    9.42    1.90
   1   6  17    5.40    1.66
   1   6  17    7.58    1.71
   2   6  17    0.25    1.49
   2   6  17   -1.28    1.61
   3   6  17    1.16    1.88
   4   6  17    1.64    2.06
   5   6  17    4.21    2.32
  -5   7  17    3.13    1.82
  -4   7  17    4.52    1.73
  -3   7  17    3.59    1.72
  -2   7  17    5.36    1.83
  -1   7  17    0.04    1.68
   0   7  17    7.99    1.96
   1   7  17    0.26    1.53
   2   7  17    5.84    1.69
   2   7  17    9.48    2.24
   3   7  17    5.79    2.07
   4   7  17   -1.70    1.95
   5   7  17    1.09    2.21
  -5   8  17    5.53    1.92
  -4   8  17    2.23    1.77
  -3   8  17    4.53    1.77
  -2   8  17    9.01    1.94
  -1   8  17    2.48    1.81
   0   8  17   -0.01    1.59
   1   8  17    0.39    1.61
   2   8  17   11.68    2.10
   2   8  17    8.78    2.12
   3   8  17    6.58    2.22
   4   8  17   -0.35    2.12
   5   8  17    5.10    2.48
  -4   9  17    2.01    1.76
  -3   9  17    6.21    1.94
  -2   9  17    3.01    1.87
  -1   9  17    4.23    1.90
   0   9  17    2.61    1.72
   1   9  17    2.80    1.74
   2   9  17   -1.85    1.82
   2   9  17    2.56    1.74
   3   9  17    9.55    2.33
   4   9  17   -2.02    2.01
  -4  10  17    8.66    2.02
  -3  10  17    8.00    2.03
  -2  10  17   -1.57    1.77
  -1  10  17    7.60    2.08
   0  10  17    5.01    1.90
   1  10  17    9.49    2.03
   2  10  17    0.69    1.78
   3  10  17    7.58    2.34
   4  10  17    5.56    2.45
  -3  11  17    2.94    1.88
  -2  11  17    3.04    1.90
  -1  11  17    3.85    1.95
   0  11  17   -1.46    1.79
   1  11  17    4.60    1.96
   2  11  17   -0.88    1.80
   3  11  17    5.83    2.35
  -3  12  17    0.85    1.91
  -2  12  17    4.76    2.05
  -1  12  17    0.74    1.97
   0  12  17    3.28    2.05
   1  12  17    0.27    1.88
   2  12  17    9.26    2.38
  -2  13  17    2.26    1.99
  -1  13  17    4.13    2.06
   0  13  17    8.22    2.30
   1  13  17    5.13    2.14
   0  13 -18    3.08    1.83
   0 -13  18    7.39    2.10
   2  12 -18   17.88    2.60
  -2 -12  18   18.83    2.66
   1  12 -18   14.71    2.40
  -1 -12  18   14.75    2.38
   0  12 -18    1.10    1.73
   0 -12  18    2.76    1.92
  -1  12 -18   16.86    2.26
  -2  12 -18   22.10    2.38
   3  11 -18    2.45    1.99
  -3 -11  18   -2.27    2.03
   2  11 -18   18.10    2.49
  -2 -11  18   14.54    2.45
   1  11 -18    1.35    1.78
  -1 -11  18    0.47    1.84
   0  11 -18    5.39    1.83
   0 -11  18    8.76    2.05
  -1  11 -18    0.62    1.63
  -2  11 -18   15.14    2.04
  -3  11 -18    0.42    1.43
   3  10 -18    9.77    2.24
  -3 -10  18    4.38    2.13
   2  10 -18   12.33    2.19
  -2 -10  18   10.91    2.29
   1  10 -18   43.28    3.02
  -1 -10  18   46.24    3.08
   0  10 -18    1.58    1.55
   0 -10  18    0.52    1.72
  -1  10 -18   44.33    2.89
   1 -10  18   48.77    2.89
  -2  10 -18   13.57    1.92
  -3  10 -18    7.45    1.66
   4   9 -18    2.25    2.04
  -4  -9  18   -2.16    1.88
   3   9 -18    5.94    2.03
  -3  -9  18   10.53    2.29
   2   9 -18    3.99    1.83
  -2  -9  18    1.55    1.90
   1   9 -18    0.50    1.64
  -1  -9  18    0.50    1.75
   0   9 -18   46.91    2.92
   0  -9  18   48.22    2.93
  -1   9 -18    0.71    1.39
   1  -9  18   -0.30    1.50
  -2   9 -18    3.40    1.48
  -3   9 -18   13.23    1.77
  -4   9 -18    1.62    1.30
  -4   9 -18    3.62    1.40
   4   8 -18    4.11    1.99
  -4  -8  18    4.35    2.05
   3   8 -18    2.23    1.85
  -3  -8  18   -3.65    1.80
   2   8 -18   14.97    2.13
  -2  -8  18   13.61    2.27
   1   8 -18    7.98    1.82
  -1  -8  18    9.34    2.03
   0   8 -18    5.54    1.70
   0  -8  18    4.87    1.71
  -1   8 -18   10.45    1.75
   1  -8  18    7.14    1.66
  -2   8 -18   17.83    1.97
  -3   8 -18    2.02    1.16
  -3   8 -18    4.02    1.39
  -4   8 -18    7.64    1.47
  -4   8 -18    6.67    1.47
  -5  -7  18    7.69    2.12
   4   7 -18   24.13    2.50
  -4  -7  18   19.08    2.47
   3   7 -18    7.13    1.95
  -3  -7  18   11.18    2.17
   2   7 -18    2.41    1.64
  -2  -7  18    1.72    1.84
   1   7 -18   12.15    1.96
  -1  -7  18   10.98    2.08
   0   7 -18    4.68    1.62
   0  -7  18    6.70    1.78
  -1   7 -18    6.85    1.59
   1  -7  18    8.30    1.72
  -2   7 -18    4.42    1.41
  -2   7 -18    6.20    1.11
  -3   7 -18   12.47    1.47
  -3   7 -18   14.17    1.71
  -4   7 -18   26.66    2.09
  -4   7 -18   31.03    2.24
   5   6 -18    2.94    1.79
  -5  -6  18    4.37    2.06
   4   6 -18   -1.60    1.66
  -4  -6  18    1.17    1.82
   3   6 -18    7.44    1.87
  -3  -6  18    6.38    1.97
   2   6 -18    1.86    1.59
  -2  -6  18    2.40    1.73
   1   6 -18    4.23    1.61
  -1  -6  18    7.29    1.92
   0   6 -18    3.57    1.54
   0  -6  18    4.93    1.70
  -1   6 -18    6.31    1.57
   1  -6  18    8.10    1.69
  -2   6 -18   -1.69    1.21
  -2   6 -18   -0.74    0.91
  -3   6 -18    8.17    1.38
  -3   6 -18    9.08    1.47
  -4   6 -18    2.17    1.20
  -4   6 -18    1.61    1.29
  -5   6 -18    6.10    1.64
   5   5 -18    1.17    1.73
  -5  -5  18    2.05    1.84
   4   5 -18   20.04    2.24
  -4  -5  18    8.96    2.08
   3   5 -18    4.05    1.75
  -3  -5  18    7.78    1.94
   2   5 -18   10.77    1.90
  -2  -5  18   14.36    2.07
   1   5 -18   18.90    2.11
  -1  -5  18   22.49    2.27
   0   5 -18   16.84    1.92
   0  -5  18   11.67    1.94
  -1   5 -18   21.12    2.01
   1  -5  18   20.41    2.00
  -2   5 -18   12.63    1.67
   2  -5  18   13.78    1.59
  -3   5 -18    9.42    1.38
  -3   5 -18    6.71    1.42
  -4   5 -18   15.90    1.60
  -4   5 -18   17.28    1.77
  -5   5 -18    1.05    1.07
  -5   5 -18    2.47    1.47
   5   4 -18    3.14    1.76
  -5  -4  18    1.14    1.79
   4   4 -18    0.81    1.67
  -4  -4  18    2.23    1.84
   3   4 -18   26.70    2.34
  -3  -4  18   25.69    2.50
   2   4 -18    9.58    1.80
  -2  -4  18    5.90    1.89
   1   4 -18   38.25    2.58
  -1  -4  18   41.48    2.72
   0   4 -18   12.22    1.69
   0  -4  18   11.62    1.90
  -1   4 -18   41.41    2.48
   1  -4  18   40.43    2.49
  -2   4 -18    4.16    1.39
   2  -4  18    3.59    1.32
  -3   4 -18   33.38    2.23
  -4   4 -18    2.99    1.18
  -4   4 -18    2.77    1.31
  -5   4 -18    2.01    1.41
  -5   4 -18    1.82    1.05
   5   3 -18    2.08    1.70
  -5  -3  18    4.40    1.87
   4   3 -18    3.60    1.66
  -4  -3  18    5.14    1.81
   3   3 -18   20.22    2.14
  -3  -3  18   24.15    2.43
   2   3 -18    9.87    1.78
  -2  -3  18    8.57    1.93
   1   3 -18   20.91    2.03
  -1  -3  18   20.79    2.20
   0   3 -18   21.09    1.99
   0  -3  18   19.04    2.06
  -1   3 -18   24.20    2.04
   1  -3  18   19.06    1.98
  -2   3 -18   10.34    1.55
   2  -3  18   10.13    1.55
  -3   3 -18   25.90    1.93
  -4   3 -18    4.07    1.21
  -5   3 -18    6.08    1.19
  -5   3 -18    3.40    1.49
   5   2 -18   -2.23    1.52
  -5  -2  18    3.59    1.87
   4   2 -18    0.11    1.57
  -4  -2  18    2.68    1.75
   3   2 -18   -0.43    1.50
  -3  -2  18   -0.38    1.64
   2   2 -18   50.73    2.79
  -2  -2  18   53.57    3.00
   1   2 -18   34.95    2.43
  -1  -2  18   29.47    2.39
   0   2 -18   27.33    2.15
   0  -2  18   25.54    2.25
  -1   2 -18   36.73    2.33
   1  -2  18   38.31    2.42
  -2   2 -18   53.50    2.59
   2  -2  18   51.86    2.91
   2  -2  18   53.13    2.49
  -3   2 -18    2.65    1.19
   3  -2  18    1.49    1.70
  -4   2 -18    3.19    1.20
   4  -2  18    4.18    2.03
  -5   2 -18    2.52    1.06
   5   1 -18   11.72    1.93
  -5  -1  18   12.62    2.13
   4   1 -18   11.33    1.89
  -4  -1  18    8.63    1.94
   3   1 -18    1.82    1.55
  -3  -1  18    1.01    1.67
   2   1 -18    5.73    1.60
  -2  -1  18    3.97    1.75
   1   1 -18    7.16    1.57
  -1  -1  18    5.42    0.85
  -1  -1  18    2.77    1.59
   0   1 -18   47.38    2.61
   0  -1  18   50.43    2.24
   0  -1  18   55.06    2.83
   0  -1  18   53.32    2.06
  -1   1 -18    4.78    1.43
   1  -1  18    4.95    1.43
   1  -1  18    6.14    1.18
   1  -1  18    6.16    1.62
  -2   1 -18    7.06    1.41
   2  -1  18    3.22    1.33
   2  -1  18    4.31    1.66
  -3   1 -18    0.56    1.16
   3  -1  18    1.73    1.74
  -4   1 -18   14.99    1.56
   4  -1  18   12.09    2.27
  -5   1 -18   13.56    1.40
   5  -1  18   11.42    2.52
   5   0 -18    2.42    1.61
  -5   0  18    4.46    1.75
   4   0 -18    5.71    1.68
  -4   0  18    2.90    1.69
   3   0 -18   15.59    1.93
  -3   0  18   12.20    1.98
   2   0 -18   25.25    2.12
  -2   0  18   18.05    2.10
   1   0 -18   38.86    2.47
  -1   0  18   37.63    2.58
  -1   0  18   40.73    1.75
   0   0  18   20.31    2.08
   0   0  18   18.67    1.35
   0   0  18   20.43    1.59
   1   0  18   41.05    2.44
   1   0  18   36.56    2.41
   2   0  18   24.62    2.30
   2   0  18   21.78    1.86
   3   0  18    9.78    1.96
   4   0  18    3.12    1.94
   5   0  18    1.30    2.06
  -5   1  18    9.28    1.91
   4  -1 -18   11.99    1.83
  -4   1  18    7.96    1.82
   3  -1 -18    2.09    1.52
  -3   1  18   -1.40    1.59
   2  -1 -18    6.57    1.53
  -2   1  18    4.80    1.76
  -1   1  18    4.06    1.60
  -1   1  18    5.78    1.03
   0   1  18   49.14    2.35
   0   1  18   50.09    2.72
   0   1  18   49.93    2.18
   1   1  18    4.51    1.45
   1   1  18    2.25    1.40
   2   1  18    3.00    1.56
   2   1  18    5.47    1.45
   3   1  18    2.39    1.74
   4   1  18   10.49    2.19
   5   1  18    8.26    2.27
  -5   2  18    1.66    1.62
   4  -2 -18   -0.66    1.48
  -4   2  18    2.12    1.65
   3  -2 -18    3.23    1.55
  -3   2  18    1.91    1.68
  -2   2  18   47.33    2.84
  -1   2  18   33.06    2.52
  -1   2  18   31.58    1.91
   0   2  18   24.39    1.89
   0   2  18   24.73    2.23
   1   2  18   31.94    2.37
   1   2  18   36.52    2.52
   2   2  18   50.66    2.96
   2   2  18   49.86    2.58
   3   2  18    0.40    1.65
   4   2  18    3.98    2.07
   5   2  18    1.19    2.11
  -5   3  18    2.65    1.74
   4  -3 -18    2.52    1.56
  -4   3  18    1.25    1.65
   3  -3 -18   20.35    2.09
  -3   3  18   18.26    2.18
  -2   3  18   10.81    1.97
  -1   3  18   18.65    1.63
  -1   3  18   21.81    2.21
   0   3  18   20.32    2.14
   0   3  18   18.51    1.84
   1   3  18   16.95    2.02
   1   3  18   19.99    2.10
   2   3  18    4.50    1.73
   2   3  18    7.79    1.66
   3   3  18   24.03    2.57
   4   3  18    2.79    1.85
   5   3  18    4.83    2.35
  -5   4  18    4.93    1.80
   4  -4 -18    2.03    1.56
  -4   4  18    1.84    1.66
  -3   4  18   24.12    2.29
  -2   4  18    4.07    1.77
  -1   4  18   38.18    2.74
  -1   4  18   40.08    2.35
   0   4  18    7.25    1.54
   0   4  18    5.71    1.73
   1   4  18   38.51    2.66
   1   4  18   41.38    2.71
   2   4  18    3.74    1.75
   2   4  18    8.19    1.76
   3   4  18   24.99    2.67
   4   4  18    0.66    1.91
   5   4  18    2.50    2.21
  -5   5  18   -1.63    1.58
   4  -5 -18   15.93    2.05
  -4   5  18    9.69    1.94
  -3   5  18    2.80    1.73
  -2   5  18   10.88    1.99
  -1   5  18   18.02    2.24
   0   5  18   12.82    1.94
   0   5  18   10.85    2.04
   1   5  18   19.25    2.25
   1   5  18   24.19    2.32
   2   5  18   10.20    1.91
   2   5  18   11.43    2.03
   3   5  18    4.10    1.99
   4   5  18   10.26    2.42
   5   5  18    1.92    2.27
  -5   6  18    9.31    2.05
  -4   6  18   -0.18    1.62
  -3   6  18    3.60    1.82
  -2   6  18   -1.07    1.70
  -1   6  18    3.16    1.75
   0   6  18    4.83    1.85
   1   6  18    4.35    1.74
   1   6  18    4.13    1.64
   2   6  18   -1.35    1.51
   2   6  18    0.46    1.68
   3   6  18    2.18    1.95
   4   6  18    0.73    2.08
   5   6  18    6.87    2.45
  -5   7  18    9.43    2.06
  -3   7  18    8.11    1.96
  -2   7  18    2.42    1.86
  -1   7  18    8.60    2.00
   0   7  18    2.33    1.72
   1   7  18    7.90    1.92
   1   7  18    5.84    1.75
   2   7  18    6.42    1.98
   2   7  18    2.19    1.65
   3   7  18    5.31    2.10
   4   7  18   15.06    2.59
   5   7  18    5.01    2.47
  -4   8  18    3.57    1.88
  -3   8  18    2.14    1.76
  -2   8  18   10.06    2.08
  -1   8  18    8.61    2.09
   0   8  18    5.11    1.76
   1   8  18    6.61    1.90
   2   8  18   10.34    2.17
   2   8  18   12.51    2.14
   3   8  18    4.01    2.15
   4   8  18    3.21    2.16
  -4   9  18    1.63    1.71
  -3   9  18    6.94    2.01
  -2   9  18    1.36    1.80
  -1   9  18    3.80    1.93
   0   9  18   49.32    3.19
   1   9  18    3.21    1.89
   2   9  18    1.41    1.90
   2   9  18    0.04    1.71
   3   9  18    6.20    2.30
   4   9  18    2.45    2.19
  -3  10  18    1.07    1.84
  -2  10  18    6.23    2.03
  -1  10  18   36.90    3.02
   0  10  18    3.04    1.85
   1  10  18   36.80    3.03
   2  10  18    5.81    2.22
   2  10  18    7.98    2.24
   3  10  18    6.06    2.35
  -3  11  18    0.11    1.83
  -2  11  18   10.24    2.23
  -1  11  18   -3.41    1.84
   0  11  18    2.73    1.94
   1  11  18   -0.60    1.83
   2  11  18   17.67    2.60
   3  11  18    0.11    2.25
  -2  12  18   10.01    2.23
  -1  12  18    9.40    2.28
   0  12  18    0.28    1.94
   1  12  18   14.09    2.50
   2  12  18   14.65    2.59
  -1  13  18   -1.96    1.99
   0  13  18    3.81    2.26
   1  12 -19    4.02    2.00
  -1 -12  19    3.73    2.03
   0  12 -19    3.24    1.84
   0 -12  19    6.29    2.06
  -1  12 -19    2.82    1.78
   2  11 -19    1.37    2.01
  -2 -11  19    1.27    2.01
   1  11 -19    0.87    1.82
  -1 -11  19    1.87    1.91
   0  11 -19    1.32    1.74
   0 -11  19   -1.19    1.75
  -1  11 -19   -1.77    1.51
  -2  11 -19    5.75    1.76
   3  10 -19    6.51    2.14
  -3 -10  19    8.42    2.34
   2  10 -19    7.22    2.10
  -2 -10  19    5.66    2.18
   1  10 -19   11.28    2.09
  -1 -10  19   12.32    2.29
   0  10 -19    6.24    1.91
   0 -10  19    9.03    2.02
  -1  10 -19    9.74    1.93
  -2  10 -19    8.85    1.79
  -3  10 -19    7.89    1.77
   3   9 -19   10.83    2.19
  -3  -9  19    9.96    2.39
   2   9 -19   31.97    2.81
  -2  -9  19   34.02    2.92
   1   9 -19    3.73    1.75
  -1  -9  19    5.17    2.01
   0   9 -19    2.89    1.60
   0  -9  19    4.63    1.80
  -1   9 -19    5.09    1.63
   1  -9  19    1.35    1.62
  -2   9 -19   33.68    2.56
  -3   9 -19   11.03    1.73
   4   8 -19    0.88    1.91
  -4  -8  19    0.06    1.92
   3   8 -19    2.91    1.88
  -3  -8  19    5.28    2.05
   2   8 -19    5.21    1.87
  -2  -8  19    2.30    1.95
   1   8 -19   10.60    1.99
  -1  -8  19    7.72    1.97
   0   8 -19   16.17    2.17
   0  -8  19   15.12    2.14
  -1   8 -19    9.85    1.79
   1  -8  19   13.49    1.93
  -2   8 -19    4.55    1.53
  -3   8 -19    7.19    1.52
  -4   8 -19    1.35    1.29
  -4   8 -19    2.31    1.31
   4   7 -19    6.26    2.04
  -4  -7  19    9.25    2.23
   3   7 -19   12.78    2.19
  -3  -7  19    9.63    2.23
   2   7 -19    1.85    1.69
  -2  -7  19    1.08    1.92
   1   7 -19   28.35    2.50
  -1  -7  19   27.76    2.59
   0   7 -19   14.56    2.01
   0  -7  19   16.01    2.11
  -1   7 -19   26.43    2.28
   1  -7  19   27.76    2.31
  -2   7 -19    4.31    1.47
  -3   7 -19   11.05    1.50
  -3   7 -19   14.38    1.80
  -4   7 -19   11.58    1.59
  -4   7 -19   14.38    1.73
   4   6 -19    1.23    1.80
  -4  -6  19    2.09    1.91
   3   6 -19   15.32    2.15
  -3  -6  19   12.54    2.24
   2   6 -19    3.44    1.68
  -2  -6  19    6.65    2.01
   1   6 -19   18.00    2.13
  -1  -6  19   21.67    2.37
   0   6 -19   99.24    3.84
   0  -6  19   99.06    3.87
  -1   6 -19   22.25    2.12
   1  -6  19   17.22    2.01
  -2   6 -19    6.65    1.52
  -3   6 -19   14.16    1.53
  -3   6 -19   15.48    1.74
  -4   6 -19    3.24    1.28
  -4   6 -19    1.39    1.31
   5   5 -19    3.20    1.76
  -5  -5  19    0.42    1.85
   4   5 -19    2.38    1.84
  -4  -5  19    4.34    1.93
   3   5 -19   16.88    2.17
  -3  -5  19   16.24    2.28
   2   5 -19    5.23    1.73
  -2  -5  19    3.72    1.84
   1   5 -19   28.31    2.41
  -1  -5  19   26.22    2.45
   0   5 -19   -0.71    1.39
   0  -5  19    2.12    1.58
  -1   5 -19   30.69    2.32
   1  -5  19   32.30    2.41
  -2   5 -19    5.18    1.47
  -3   5 -19   21.09    1.89
  -4   5 -19    7.79    1.37
  -4   5 -19    7.54    1.52
  -5   5 -19    0.76    1.41
   5   4 -19    0.13    1.77
  -5  -4  19    3.18    1.88
   4   4 -19   -1.56    1.66
  -4  -4  19    0.34    1.84
   3   4 -19    1.09    1.62
  -3  -4  19    0.44    1.78
   2   4 -19    0.09    1.57
  -2  -4  19    1.14    1.74
   1   4 -19   12.96    1.88
  -1  -4  19   12.90    2.13
   0   4 -19   56.47    2.89
   0  -4  19   53.47    2.96
  -1   4 -19   11.39    1.73
   1  -4  19   12.91    1.85
  -2   4 -19   -0.47    1.25
   2  -4  19   -1.17    1.30
  -3   4 -19   -0.70    1.15
  -4   4 -19    0.47    1.13
  -5   4 -19    1.40    1.50
  -5   4 -19    0.13    1.11
   5   3 -19    0.73    1.67
  -5  -3  19    2.90    1.88
   4   3 -19    0.31    1.60
  -4  -3  19   -0.98    1.75
   3   3 -19    5.51    1.77
  -3  -3  19    3.60    1.88
   2   3 -19   16.50    2.05
  -2  -3  19   15.72    2.19
   1   3 -19    9.17    1.73
  -1  -3  19   10.07    2.00
   0   3 -19    3.09    1.47
   0  -3  19    1.45    1.57
  -1   3 -19    9.59    1.66
   1  -3  19    9.19    1.77
  -2   3 -19   21.47    1.93
   2  -3  19   17.13    1.79
  -3   3 -19    5.56    1.37
  -4   3 -19   -1.55    1.07
  -5   3 -19    1.93    1.14
   5   2 -19   -2.53    1.55
  -5  -2  19    1.95    1.82
   4   2 -19    5.26    1.80
  -4  -2  19    6.53    1.96
   3   2 -19   24.68    2.27
  -3  -2  19   19.61    2.35
   2   2 -19    2.97    1.62
  -2  -2  19    5.96    1.89
   1   2 -19   66.28    3.11
  -1  -2  19   69.20    3.30
   0   2 -19   27.06    2.17
   0  -2  19   25.76    2.36
  -1   2 -19   71.64    3.10
   1  -2  19   72.15    3.12
  -2   2 -19    6.75    1.47
   2  -2  19    6.31    1.54
   2  -2  19    5.22    1.70
  -3   2 -19   24.98    1.96
   3  -2  19   26.68    2.61
  -4   2 -19    3.70    1.23
   4  -2  19    7.10    2.16
  -5   2 -19    0.62    1.10
   5   1 -19   -3.21    1.57
  -5  -1  19    1.06    1.81
   4   1 -19    2.88    1.62
  -4  -1  19   -0.14    1.69
   3   1 -19    9.82    1.83
  -3  -1  19    7.29    1.94
   2   1 -19   38.47    2.62
  -2  -1  19   42.28    2.87
   1   1 -19   10.92    1.73
  -1  -1  19    9.88    1.99
   0   1 -19    1.05    1.29
   0  -1  19    2.37    1.54
  -1   1 -19    9.73    1.63
   1  -1  19   11.22    1.83
   1  -1  19    9.09    1.63
  -2   1 -19   50.72    2.59
   2  -1  19   44.01    2.95
   2  -1  19   49.65    2.53
  -3   1 -19   11.38    1.57
   3  -1  19    9.29    2.00
  -4   1 -19    0.88    1.13
   4  -1  19    0.35    1.90
  -5   1 -19    2.46    1.15
   5  -1  19    0.12    2.05
  -5   0  19    3.97    1.85
   4   0 -19    0.36    1.53
  -4   0  19   -2.23    1.61
   3   0 -19    3.63    1.62
  -3   0  19    4.31    1.81
   2   0 -19   -1.44    1.42
  -2   0  19    4.36    1.79
   1   0 -19   12.09    1.75
  -1   0  19   11.22    1.96
   0   0 -19   -0.37    1.34
   0   0  19    2.10    1.50
   0   0  19   -0.02    0.93
   0   0  19   -0.58    1.10
   1   0  19   11.01    1.70
   1   0  19   11.87    1.85
   2   0  19   -2.41    1.28
   2   0  19   -2.36    1.42
   3   0  19    3.73    1.79
   4   0  19    0.44    1.85
  -5   0 -19    6.43    1.30
   5   0  19   10.16    2.56
  -5   1  19    5.97    1.88
   4  -1 -19   -0.51    1.54
  -4   1  19    3.76    1.71
   3  -1 -19   15.61    1.98
  -3   1  19    8.85    1.98
   2  -1 -19   47.56    2.71
  -2   1  19   40.94    2.83
  -1   1  19   11.57    2.00
   0   1  19    1.65    1.52
   0   1  19    0.60    1.15
   1   1  19   10.22    1.82
   1   1  19    5.18    1.48
   2   1  19   47.37    2.55
   2   1  19   43.66    2.87
   3   1  19    8.44    2.01
   4   1  19   -2.28    1.77
   5   1  19    2.85    2.16
  -5   2  19    2.43    1.76
   4  -2 -19    6.00    1.76
  -4   2  19    4.08    1.77
   3  -2 -19   26.04    2.28
  -3   2  19   15.05    2.14
   2  -2 -19    3.98    1.58
  -2   2  19    3.37    1.81
  -1   2  19   66.22    3.25
  -1   2  19   63.29    2.50
   0   2  19   24.75    2.10
   0   2  19   23.35    2.29
   1   2  19   66.46    3.14
   1   2  19   67.75    3.09
   2   2  19    2.70    1.69
   2   2  19    5.03    1.53
   3   2  19   21.46    2.52
   4   2  19    0.20    1.94
   5   2  19    0.25    2.14
  -5   3  19    0.59    1.69
   4  -3 -19    1.33    1.60
  -4   3  19   -0.17    1.61
   3  -3 -19    6.91    1.77
  -3   3  19    3.83    1.78
  -2   3  19   14.22    2.10
  -1   3  19   10.76    1.44
  -1   3  19    5.26    1.78
   0   3  19   -0.55    1.30
   0   3  19   -0.91    1.49
   1   3  19    6.76    1.81
   1   3  19    7.75    1.75
   2   3  19   20.14    2.34
   2   3  19   17.63    2.03
   3   3  19    4.20    1.90
   4   3  19    0.26    1.96
   5   3  19    4.28    2.30
  -5   4  19    0.20    1.73
   4  -4 -19    0.06    1.58
  -4   4  19    1.13    1.73
  -3   4  19    1.01    1.67
  -2   4  19   -1.13    1.70
  -1   4  19    6.79    1.42
  -1   4  19    9.28    1.99
   0   4  19   50.91    3.05
   0   4  19   55.94    2.84
   1   4  19    8.32    1.77
   1   4  19    7.93    1.74
   2   4  19   -0.68    1.44
   2   4  19   -0.48    1.67
   3   4  19    2.18    1.96
   4   4  19    1.96    2.05
   5   4  19   -0.68    2.04
  -5   5  19    0.33    1.74
   4  -5 -19    3.51    1.74
  -4   5  19    4.16    1.82
  -3   5  19   11.80    2.14
  -2   5  19    5.89    1.99
  -1   5  19   24.47    2.44
   0   5  19   -0.16    1.62
   0   5  19    1.93    1.49
   1   5  19   24.51    2.42
   1   5  19   23.79    2.39
   2   5  19    3.23    1.63
   2   5  19    4.26    1.81
   3   5  19   17.97    2.62
   4   5  19    3.41    2.11
   5   5  19    1.56    2.20
   4  -6 -19    1.81    1.77
  -4   6  19    1.15    1.80
  -3   6  19    7.03    2.04
  -2   6  19    5.09    1.93
  -1   6  19   19.04    2.36
   0   6  19   87.43    3.83
   1   6  19   18.57    2.35
   1   6  19   16.26    2.30
   2   6  19    2.68    1.64
   2   6  19    4.81    1.94
   3   6  19    6.38    2.15
   4   6  19   -0.17    2.06
  -4   7  19    5.02    1.94
  -3   7  19    9.74    2.06
  -2   7  19    2.91    1.90
  -1   7  19   23.86    2.54
   0   7  19   14.73    2.27
   1   7  19   22.87    2.45
   1   7  19   22.18    2.57
   2   7  19    2.46    1.64
   2   7  19   -0.24    1.86
   3   7  19    7.03    2.20
   4   7  19   12.86    2.65
  -4   8  19    0.01    1.74
  -3   8  19    2.53    1.83
  -2   8  19    2.88    1.90
  -1   8  19    9.00    2.11
   0   8  19   15.69    2.32
   1   8  19   10.41    2.22
   1   8  19   10.78    2.34
   2   8  19    0.42    1.91
   2   8  19    0.74    1.69
   3   8  19    2.51    2.06
   4   8  19   -1.39    2.13
  -3   9  19    6.13    2.05
  -1   9  19    3.20    1.96
   0   9  19    1.35    1.80
   1   9  19    2.68    1.93
   2   9  19   17.13    2.59
   2   9  19   27.04    2.68
   3   9  19    5.27    2.36
  -3  10  19    6.03    2.03
  -2  10  19    3.86    2.09
  -1  10  19    8.42    2.23
   0  10  19    3.20    1.96
   1  10  19    7.91    2.18
   2  10  19    3.60    2.18
   2  10  19    5.20    1.99
   3  10  19    2.13    2.26
  -2  11  19    1.23    1.93
  -1  11  19    0.38    2.08
   0  11  19    1.04    1.93
   1  11  19    1.42    1.87
   2  11  19    2.77    2.01
   2  11  19    4.04    2.24
  -1  12  19    3.82    2.21
   0  12  19    4.19    2.11
   1  12  19    0.33    1.97
   2  11 -20    4.25    2.10
   1  11 -20    0.25    1.78
  -1 -11  20    0.80    1.97
   0  11 -20   11.70    2.10
   0 -11  20   13.43    2.28
  -1  11 -20   -0.79    1.54
   2  10 -20   10.27    2.22
  -2 -10  20    8.08    2.27
   1  10 -20    6.85    2.00
  -1 -10  20    4.73    2.02
   0  10 -20    0.92    1.70
   0 -10  20    0.56    1.78
  -1  10 -20    6.15    1.81
  -2  10 -20    9.90    1.91
   3   9 -20    5.67    2.03
  -3  -9  20    8.19    2.32
   2   9 -20    4.12    1.97
  -2  -9  20    3.33    2.05
   1   9 -20    5.29    1.83
  -1  -9  20   -2.09    1.77
   0   9 -20   29.82    2.62
   0  -9  20   26.81    2.58
  -1   9 -20    3.52    1.66
  -2   9 -20    3.04    1.57
  -3   9 -20    5.20    1.63
   3   8 -20   -0.40    1.80
  -3  -8  20    2.47    2.11
   2   8 -20    3.69    1.85
  -2  -8  20   -0.87    1.91
   1   8 -20   25.25    2.51
  -1  -8  20   27.70    2.73
   0   8 -20    1.94    1.62
   0  -8  20    3.19    1.83
  -1   8 -20   29.07    2.48
   1  -8  20   27.11    2.39
  -2   8 -20    2.76    1.50
  -3   8 -20    1.66    1.36
   4   7 -20   23.61    2.61
  -4  -7  20   18.07    2.54
   3   7 -20   -0.10    1.78
  -3  -7  20    1.49    2.02
   2   7 -20    5.66    1.91
  -2  -7  20    1.67    1.93
   1   7 -20    1.84    1.69
  -1  -7  20    3.86    1.85
   0   7 -20    2.59    1.62
   0  -7  20    1.88    1.74
  -1   7 -20    3.29    1.53
   1  -7  20   -0.96    1.55
  -2   7 -20    4.87    1.53
  -3   7 -20    2.42    1.35
  -4   7 -20   26.02    2.07
  -4   7 -20   21.56    1.97
   4   6 -20    2.48    1.89
  -4  -6  20    1.91    2.00
   3   6 -20    6.51    1.96
  -3  -6  20    5.55    2.13
   2   6 -20   20.11    2.31
  -2  -6  20   23.90    2.60
   1   6 -20    3.17    1.61
  -1  -6  20    1.68    1.79
   0   6 -20    8.62    1.77
   0  -6  20    8.24    1.98
  -1   6 -20    3.83    1.52
   1  -6  20    3.96    1.66
  -2   6 -20   27.98    2.29
  -3   6 -20    7.25    1.54
  -4   6 -20    1.10    1.23
  -4   6 -20    0.90    1.30
   4   5 -20    7.88    2.05
  -4  -5  20    4.75    1.99
   3   5 -20   11.43    2.02
  -3  -5  20    9.78    2.17
   2   5 -20    7.04    1.83
  -2  -5  20    5.87    2.00
   1   5 -20    7.90    1.83
  -1  -5  20    4.99    1.85
   0   5 -20    3.62    1.60
   0  -5  20    7.52    1.84
  -1   5 -20    8.48    1.67
   1  -5  20    9.45    1.86
  -2   5 -20    3.31    1.47
  -3   5 -20   10.24    1.62
  -4   5 -20    9.81    1.53
  -5  -4  20    5.81    2.09
   4   4 -20    5.46    1.89
  -4  -4  20    2.72    1.92
   3   4 -20    7.48    1.89
  -3  -4  20    8.95    2.17
   2   4 -20    9.80    1.92
  -2  -4  20   12.74    2.24
   1   4 -20    5.79    1.71
  -1  -4  20    7.71    1.99
   0   4 -20    4.92    1.58
   0  -4  20    1.70    1.64
  -1   4 -20    6.99    1.65
   1  -4  20    8.85    1.84
  -2   4 -20   15.48    1.86
  -3   4 -20   11.95    1.68
  -4   4 -20    6.42    1.38
  -5  -3  20    1.49    1.86
   4   3 -20   11.66    2.05
  -4  -3  20   11.93    2.17
   3   3 -20   16.89    2.19
  -3  -3  20   15.89    2.29
   2   3 -20    6.90    1.80
  -2  -3  20    4.34    1.95
   1   3 -20    3.21    1.60
  -1  -3  20    2.16    1.68
   0   3 -20   23.87    2.20
   0  -3  20   28.06    2.47
  -1   3 -20    0.83    1.39
   1  -3  20    1.00    1.54
  -2   3 -20    6.77    1.52
  -3   3 -20   17.57    1.81
  -4   3 -20   14.48    1.63
  -5   3 -20    3.21    1.24
  -5  -2  20    4.88    1.92
   4   2 -20    2.48    1.75
  -4  -2  20    2.40    1.92
   3   2 -20   15.97    2.08
  -3  -2  20   14.08    2.25
   2   2 -20   17.49    2.07
  -2  -2  20   18.83    2.33
   1   2 -20   11.88    1.87
  -1  -2  20   14.02    2.19
   0   2 -20    9.56    1.70
   0  -2  20    8.34    1.96
  -1   2 -20   15.23    1.85
   1  -2  20   16.62    2.02
  -2   2 -20   25.39    2.09
   2  -2  20   24.17    2.06
  -3   2 -20   22.07    1.90
   3  -2  20   18.20    2.50
  -4   2 -20    3.75    1.27
  -5   2 -20    6.23    1.33
  -5  -1  20    4.17    1.93
   4   1 -20    5.16    1.82
  -4  -1  20    0.49    1.77
   3   1 -20    8.20    1.87
  -3  -1  20    7.23    2.01
   2   1 -20   17.21    2.07
  -2  -1  20   18.83    2.35
   1   1 -20   22.14    2.11
  -1  -1  20   17.33    2.29
   0   1 -20   39.10    2.54
   0  -1  20   37.91    2.75
  -1   1 -20   23.28    2.07
   1  -1  20   21.12    1.95
   1  -1  20   18.87    2.12
  -2   1 -20   23.77    2.04
   2  -1  20   19.52    2.23
   2  -1  20   18.27    1.91
  -3   1 -20    7.61    1.47
   3  -1  20    2.79    1.92
  -4   1 -20    7.60    1.43
   4  -1  20    5.05    2.09
  -5   1 -20    3.71    1.24
   5  -1  20    2.84    2.27
  -5   0  20    3.68    1.88
   4   0 -20    1.15    1.67
  -4   0  20   -0.43    1.74
   3   0 -20   -0.17    1.59
  -3   0  20    0.89    1.80
   2   0 -20    8.16    1.71
  -2   0  20    4.36    1.87
   1   0 -20    3.37    1.57
  -1   0  20    2.45    1.71
   0   0 -20   66.85    3.10
   0   0  20   68.70    3.25
   0   0  20   65.85    2.75
   1   0  20    2.76    1.61
   1   0  20    1.80    1.43
   2   0  20    4.91    1.73
   2   0  20    1.68    1.43
   3   0  20    1.35    1.81
   4   0  20   -2.92    1.84
  -5   0 -20    7.53    1.38
   5   0  20    7.52    2.37
  -5   1  20    1.02    1.82
   4  -1 -20    9.60    1.87
  -4   1  20    5.80    1.92
   3  -1 -20    7.25    1.81
  -3   1  20    3.41    1.82
   2  -1 -20   19.18    2.10
  -2   1  20   16.77    2.26
   1  -1 -20   18.92    2.08
  -1   1  20   21.55    2.40
   0   1  20   32.80    2.20
   0   1  20   37.78    2.74
   1   1  20   23.12    2.24
   1   1  20   21.74    2.09
   2   1  20   19.84    2.24
   2   1  20   16.22    1.95
   3   1  20    6.36    1.98
   4   1  20    6.70    2.08
   5   1  20    3.62    2.25
  -5   2  20    4.73    1.91
   4  -2 -20    2.37    1.68
  -4   2  20    2.03    1.78
   3  -2 -20   14.43    1.99
  -3   2  20   12.70    2.11
   2  -2 -20   19.16    2.13
  -2   2  20   17.85    2.26
  -1   2  20   11.51    2.10
   0   2  20    5.55    1.75
   0   2  20    3.18    1.37
   1   2  20   12.52    1.98
   1   2  20   12.30    1.87
   2   2  20   22.59    2.09
   2   2  20   19.27    2.28
   3   2  20   10.80    2.15
   4   2  20    1.12    2.03
   5   2  20    5.36    2.42
  -5   3  20    2.69    1.77
   4  -3 -20   11.49    2.00
  -4   3  20    7.87    1.98
   3  -3 -20   18.48    2.13
  -3   3  20   11.95    2.12
  -2   3  20    8.43    1.97
  -1   3  20    2.46    1.25
  -1   3  20    3.50    1.71
   0   3  20   19.17    1.96
   0   3  20   19.08    2.32
   1   3  20    1.97    1.63
   1   3  20    2.04    1.58
   2   3  20    7.75    1.88
   2   3  20    8.43    1.81
   3   3  20   10.60    2.14
   4   3  20    8.69    2.34
   5   3  20    1.07    2.22
  -5   4  20    9.12    2.06
   4  -4 -20    3.49    1.78
  -4   4  20    3.79    1.84
   3  -4 -20    8.70    1.92
  -3   4  20    5.29    1.90
  -2   4  20    9.93    2.08
  -1   4  20    5.40    1.45
  -1   4  20    6.59    2.01
   0   4  20    1.37    1.43
   0   4  20    3.79    1.74
   1   4  20    3.51    1.70
   1   4  20    4.58    1.72
   2   4  20   11.33    1.97
   2   4  20    8.42    1.97
   3   4  20    4.45    1.96
   4   4  20    5.85    2.20
   5   4  20    7.91    2.62
   4  -5 -20    8.59    1.92
  -4   5  20    5.58    1.92
  -3   5  20    5.31    1.91
  -2   5  20    1.15    1.90
  -1   5  20    6.95    2.06
  -1   5  20    3.87    1.48
   0   5  20    3.78    1.66
   0   5  20    4.05    1.85
   1   5  20    6.67    1.84
   1   5  20    3.44    1.72
   2   5  20    3.04    1.68
   2   5  20    2.07    1.88
   3   5  20    8.40    2.18
   4   5  20    3.38    2.16
   4  -6 -20    2.68    1.86
  -4   6  20    1.92    1.85
  -3   6  20    4.46    1.94
  -2   6  20   16.38    2.39
  -1   6  20    5.70    1.97
   0   6  20    5.86    2.07
   0   6  20    4.24    1.69
   1   6  20    3.26    1.75
   1   6  20    3.40    1.76
   2   6  20   22.28    2.66
   2   6  20   22.64    2.42
   3   6  20    6.33    2.19
   4   6  20   -2.54    2.11
  -3   7  20   -1.03    1.80
  -2   7  20    4.18    2.01
  -1   7  20    1.33    1.89
   0   7  20    0.60    1.77
   0   7  20    3.53    1.81
   1   7  20    1.39    1.83
   1   7  20    1.34    1.75
   2   7  20    3.82    1.98
   2   7  20    2.70    1.80
   3   7  20    2.06    2.12
   4   7  20   11.73    2.55
  -3   8  20    0.68    1.85
  -2   8  20    0.72    1.87
  -1   8  20   22.85    2.61
   0   8  20    2.40    1.91
   1   8  20   21.58    2.71
   1   8  20   26.11    2.72
   2   8  20    2.11    1.80
   2   8  20    2.15    2.02
   3   8  20   -1.55    2.03
  -3   9  20    1.45    1.96
  -2   9  20    6.74    2.17
  -1   9  20   -0.12    1.97
   0   9  20   19.09    2.51
   1   9  20    4.12    2.02
   1   9  20    1.62    1.87
   2   9  20    2.51    1.89
   2   9  20    1.94    2.10
   3   9  20    3.96    2.33
  -2  10  20    3.47    2.06
  -1  10  20    6.92    2.23
   0  10  20    2.04    1.92
   1  10  20    8.09    2.35
   2  10  20    5.30    2.33
   2  10  20    5.12    2.09
  -2  11  20    5.22    2.22
  -1  11  20    2.29    2.10
   0  11  20   13.15    2.54
   1  11  20   -1.37    1.91
   0  11 -21   22.28    2.59
   2  10 -21    0.46    1.87
  -2 -10  21   -3.23    1.99
   1  10 -21   10.42    2.20
  -1 -10  21   14.61    2.46
   0  10 -21    2.28    1.78
   0 -10  21    1.05    1.86
  -1  10 -21   14.38    2.13
  -2  10 -21    1.43    1.54
   2   9 -21    7.00    2.10
  -2  -9  21    5.67    2.15
   1   9 -21    0.76    1.70
  -1  -9  21    3.77    2.00
   0   9 -21    1.05    1.67
   0  -9  21   -1.95    1.76
  -1   9 -21    2.02    1.63
  -2   9 -21    6.18    1.75
   3   8 -21   16.82    2.39
  -3  -8  21   15.91    2.60
   2   8 -21    6.76    2.04
  -2  -8  21    9.43    2.27
   1   8 -21    0.57    1.72
  -1  -8  21   -1.21    1.85
   0   8 -21    1.98    1.64
   0  -8  21    0.59    1.75
  -1   8 -21    0.87    1.53
  -2   8 -21   11.69    1.91
  -3   8 -21   15.37    1.98
   3   7 -21    9.09    2.11
  -3  -7  21    6.09    2.25
   2   7 -21   11.63    2.15
  -2  -7  21   13.93    2.38
   1   7 -21    4.17    1.80
  -1  -7  21    2.72    1.88
   0   7 -21    0.46    1.55
   0  -7  21   -0.45    1.75
  -1   7 -21    6.37    1.67
   1  -7  21    4.60    1.81
  -2   7 -21   17.84    2.02
  -3   7 -21    8.14    1.67
   4   6 -21    2.43    1.94
  -4  -6  21    2.52    2.03
   3   6 -21   10.73    2.15
  -3  -6  21   13.99    2.43
   2   6 -21    5.76    1.84
  -2  -6  21    1.93    1.91
   1   6 -21    4.38    1.74
  -1  -6  21    4.87    1.96
   0   6 -21   18.37    2.19
   0  -6  21   20.54    2.44
  -1   6 -21    6.41    1.67
   1  -6  21    0.66    1.63
  -2   6 -21    4.03    1.51
  -3   6 -21   17.36    1.89
  -4   6 -21    1.09    1.30
   4   5 -21    3.51    1.91
  -4  -5  21   -3.00    1.83
   3   5 -21    3.19    1.82
  -3  -5  21    7.08    2.10
   2   5 -21   21.55    2.37
  -2  -5  21   19.24    2.45
   1   5 -21   -0.13    1.60
  -1  -5  21    3.65    1.85
   0   5 -21    0.22    1.52
   0  -5  21    5.73    1.93
  -1   5 -21    2.19    1.50
   1  -5  21   -0.85    1.58
  -2   5 -21   24.65    2.22
  -3   5 -21    6.43    1.51
  -4   5 -21    0.39    1.25
   4   4 -21    5.22    1.93
  -4  -4  21    3.63    2.00
   3   4 -21    2.91    1.81
  -3  -4  21    5.88    2.11
   2   4 -21    1.78    1.70
  -2  -4  21    2.42    2.01
   1   4 -21    5.93    1.72
  -1  -4  21    6.43    1.95
   0   4 -21    1.11    1.53
   0  -4  21    2.75    1.70
  -1   4 -21    9.58    1.74
   1  -4  21    5.60    1.72
  -2   4 -21    4.22    1.48
  -3   4 -21    5.38    1.50
  -4   4 -21    6.39    1.43
   4   3 -21   21.57    2.38
   3   3 -21    1.66    1.71
  -3  -3  21    1.13    1.89
   2   3 -21   11.36    2.00
  -2  -3  21    8.67    2.11
   1   3 -21    3.36    1.62
  -1  -3  21    1.11    1.75
   0   3 -21    0.60    1.48
   0  -3  21    1.09    1.65
  -1   3 -21    1.98    1.47
   1  -3  21    3.79    1.66
  -2   3 -21   10.73    1.71
  -3   3 -21    1.75    1.33
  -4   3 -21   23.83    1.98
   4   2 -21   10.43    1.98
  -4  -2  21    1.92    1.94
   3   2 -21    1.16    1.69
  -3  -2  21    3.05    1.96
   2   2 -21    1.61    1.64
  -2  -2  21   -2.41    1.88
   1   2 -21    4.81    1.70
  -1  -2  21    4.86    1.85
   0   2 -21   -0.50    1.46
   0  -2  21    0.58    1.63
  -1   2 -21    6.01    1.59
   1  -2  21    4.11    1.65
  -2   2 -21    3.35    1.40
  -3   2 -21    3.42    1.38
  -4   2 -21   13.11    1.66
   4   1 -21    3.83    1.77
  -4  -1  21   -0.38    1.76
   3   1 -21   11.80    2.05
  -3  -1  21   12.31    2.23
   2   1 -21    3.19    1.67
  -2  -1  21    4.39    2.00
   1   1 -21   18.55    2.15
  -1  -1  21   22.36    2.45
   0   1 -21    1.82    1.50
   0  -1  21    1.36    1.67
  -1   1 -21   17.76    2.01
   1  -1  21   23.34    2.04
   1  -1  21   21.07    2.26
  -2   1 -21    3.38    1.46
   2  -1  21    3.80    1.78
  -3   1 -21   15.63    1.79
   3  -1  21   18.26    2.48
  -4   1 -21    5.38    1.35
   4  -1  21    4.40    2.17
   4   0 -21   13.23    2.11
  -4   0  21    8.77    2.11
   3   0 -21    9.38    1.93
  -3   0  21    8.80    2.15
   2   0 -21    8.74    1.88
  -2   0  21   10.95    2.10
   1   0 -21    6.99    1.79
  -1   0  21   10.26    2.12
   0   0 -21   -0.96    1.35
   0   0  21    0.88    1.21
   0   0  21   -1.62    1.58
  -1   0 -21    9.43    1.74
   1   0  21    3.66    1.67
   1   0  21    3.97    1.57
   2   0  21    6.52    1.79
   3   0  21   12.07    2.20
  -4   0 -21   13.37    1.69
   4   0  21   11.02    2.43
   4  -1 -21    5.26    1.84
  -4   1  21    2.53    1.86
   3  -1 -21   12.53    2.05
  -3   1  21    8.08    2.03
   2  -1 -21    4.84    1.73
  -2   1  21    4.65    1.88
   1  -1 -21   18.30    2.12
  -1   1  21   18.09    2.31
   0   1  21   -1.72    1.54
   0   1  21    1.80    1.27
   1   1  21   17.18    2.01
   1   1  21   16.05    2.16
   2   1  21    4.45    1.77
   2   1  21    1.82    1.56
   3   1  21    9.12    2.14
   4   1  21    3.93    2.18
   4  -2 -21    9.65    1.97
  -4   2  21    6.18    1.93
   3  -2 -21    1.88    1.74
  -3   2  21    1.60    1.83
   2  -2 -21    2.56    1.62
  -2   2  21    0.63    1.86
  -1   2  21    5.65    1.84
   0   2  21    0.48    1.31
   0   2  21    2.95    1.72
   1   2  21    4.22    1.63
   1   2  21    4.43    1.71
   2   2  21    0.03    1.48
   2   2  21    1.56    1.66
   3   2  21    2.68    1.99
   4   2  21    3.93    2.12
   4  -3 -21   18.01    2.25
  -4   3  21   18.06    2.34
   3  -3 -21    3.88    1.74
  -3   3  21    1.55    1.84
  -2   3  21    8.26    2.08
  -1   3  21    7.17    2.07
   0   3  21   -0.46    1.64
   0   3  21   -0.45    1.37
   1   3  21    0.41    1.58
   1   3  21    3.60    1.68
   2   3  21   11.19    1.97
   2   3  21    6.65    1.89
   3   3  21    0.79    1.85
   4   3  21   22.28    2.96
   4  -4 -21    3.65    1.78
  -4   4  21    2.90    1.89
   3  -4 -21    5.86    1.83
  -3   4  21    2.39    1.90
  -2   4  21    1.80    1.95
  -1   4  21    7.41    2.12
   0   4  21    2.64    1.83
   0   4  21    1.04    1.52
   1   4  21    7.58    1.87
   1   4  21    4.85    1.79
   2   4  21    1.07    1.81
   2   4  21    1.52    1.63
   3   4  21    5.65    2.06
   4   4  21    5.04    2.27
   4  -5 -21    1.47    1.76
  -4   5  21    0.64    1.80
  -3   5  21    2.73    1.90
  -2   5  21   14.61    2.30
  -1   5  21    0.15    1.79
   0   5  21    1.89    1.84
   0   5  21    0.43    1.55
   1   5  21    1.43    1.73
   1   5  21    0.77    1.64
   2   5  21   19.83    2.36
   2   5  21   20.65    2.59
   3   5  21    2.53    2.01
   4   5  21   -0.53    2.04
   4  -6 -21    2.60    1.92
  -4   6  21   -1.32    1.82
  -3   6  21    9.47    2.20
  -2   6  21    0.90    1.95
  -1   6  21    3.47    1.95
   0   6  21   12.15    1.99
   0   6  21   19.37    2.48
   1   6  21    5.57    1.88
   1   6  21    2.30    1.81
   2   6  21    5.97    2.06
   2   6  21    2.88    1.97
   3   6  21   10.03    2.37
   4   6  21   -4.18    1.95
  -3   7  21    2.54    2.06
  -2   7  21   10.32    2.29
  -1   7  21    0.65    1.86
   0   7  21   -1.71    1.63
   0   7  21    2.77    1.89
   1   7  21    4.34    1.97
   1   7  21    7.16    2.16
   2   7  21    7.81    2.18
   2   7  21    7.03    1.99
   3   7  21    2.68    2.23
  -3   8  21    8.14    2.23
  -2   8  21    8.30    2.23
  -1   8  21    3.19    2.09
   0   8  21    1.34    1.87
   0   8  21    1.71    1.81
   1   8  21    0.81    1.85
   1   8  21    2.43    1.99
   2   8  21    7.20    2.27
   3   8  21   14.53    2.76
  -2   9  21    5.82    2.15
  -1   9  21   -2.36    2.00
   0   9  21   -1.82    1.84
   1   9  21   -1.16    1.95
   1   9  21    1.74    1.98
   2   9  21    4.32    2.24
  -2  10  21   -0.56    2.03
  -1  10  21    7.69    2.25
   0  10  21    0.94    2.03
   1  10  21    6.55    2.19
   1  10  21    9.83    2.44
   2  10  21    1.18    2.14
   0  11  21   12.76    2.55
   0  10 -22   -0.45    1.74
   2   9 -22    3.49    1.94
  -2  -9  22   -0.23    2.07
   1   9 -22    4.85    1.98
  -1  -9  22    5.78    2.12
   0   9 -22    5.12    1.88
   0  -9  22    2.88    1.92
  -1   9 -22    6.64    1.85
  -2   9 -22    4.18    1.65
   2   8 -22   15.00    2.39
  -2  -8  22   12.86    2.43
   1   8 -22    6.09    1.92
  -1  -8  22    4.15    2.04
   0   8 -22   -0.75    1.59
   0  -8  22   -1.16    1.82
  -1   8 -22    6.20    1.82
  -2   8 -22   14.21    2.05
   3   7 -22    8.82    2.15
  -3  -7  22    5.46    2.27
   2   7 -22    5.58    2.02
  -2  -7  22    6.04    2.20
   1   7 -22   10.34    2.07
  -1  -7  22   13.00    2.32
   0   7 -22    7.73    1.90
   0  -7  22    4.95    1.94
  -1   7 -22   12.49    1.98
  -2   7 -22    5.74    1.66
  -3   7 -22    8.52    1.73
   3   6 -22    7.40    2.08
  -3  -6  22    4.29    2.18
   2   6 -22   16.08    2.28
  -2  -6  22   17.74    2.58
   1   6 -22    4.59    1.77
  -1  -6  22    3.18    1.96
   0   6 -22    2.22    1.64
   0  -6  22    0.48    1.83
  -1   6 -22    2.30    1.59
  -2   6 -22   23.04    2.24
  -3   6 -22    6.94    1.58
  -4  -5  22    5.10    2.10
   3   5 -22   -1.84    1.67
  -3  -5  22   -0.17    1.98
   2   5 -22    6.55    1.95
  -2  -5  22    9.51    2.25
   1   5 -22   20.44    2.37
  -1  -5  22   24.16    2.62
   0   5 -22   -0.26    1.56
   0  -5  22   -0.58    1.71
  -1   5 -22   20.51    2.19
   1  -5  22   22.74    2.39
  -2   5 -22   12.55    1.87
  -3   5 -22    0.03    1.32
   4   4 -22   14.41    2.25
  -4  -4  22   11.50    2.32
   3   4 -22    8.16    2.03
  -3  -4  22   10.71    2.29
   2   4 -22   12.83    2.12
  -2  -4  22   11.58    2.31
   1   4 -22    5.88    1.77
  -1  -4  22    0.56    1.84
   0   4 -22    3.14    1.66
   0  -4  22    0.59    1.70
  -1   4 -22    4.39    1.58
   1  -4  22    2.34    1.71
  -2   4 -22   13.50    1.88
  -3   4 -22   11.91    1.78
  -4   4 -22   14.58    1.80
   4   3 -22   -0.62    1.70
  -4  -3  22    2.86    1.97
   3   3 -22    3.48    1.80
  -3  -3  22    3.48    1.99
   2   3 -22    9.49    1.99
  -2  -3  22    7.45    2.18
   1   3 -22   11.97    1.98
  -1  -3  22    9.86    2.20
   0   3 -22    0.68    1.57
   0  -3  22    3.44    1.79
  -1   3 -22   12.83    1.91
   1  -3  22   14.35    2.11
  -2   3 -22   13.41    1.85
  -3   3 -22    1.15    1.39
  -4   3 -22    2.32    1.39
   4   2 -22   -1.61    1.71
  -4  -2  22    1.92    1.97
   3   2 -22    2.50    1.78
  -3  -2  22    6.96    2.22
   2   2 -22   13.97    2.09
  -2  -2  22   13.27    2.35
   1   2 -22   13.78    2.06
  -1  -2  22   15.53    2.43
   0   2 -22    2.47    1.59
   0  -2  22   -0.04    1.69
  -1   2 -22   15.11    1.98
   1  -2  22   14.54    2.10
  -2   2 -22   17.55    1.96
  -3   2 -22    5.52    1.56
  -4   2 -22    0.50    1.29
   4   1 -22    1.25    1.72
  -4  -1  22    2.79    2.03
   3   1 -22   -0.68    1.64
  -3  -1  22   -0.69    1.83
   2   1 -22    6.33    1.84
  -2  -1  22    7.44    2.14
   1   1 -22    4.75    1.76
  -1  -1  22    2.96    1.89
   0   1 -22   46.49    2.85
   0  -1  22   45.22    3.04
  -1   1 -22    7.06    1.69
   1  -1  22    6.50    1.95
   1  -1  22    3.51    1.54
  -2   1 -22    4.72    1.52
   2  -1  22    6.48    1.88
  -3   1 -22   -0.56    1.29
   3  -1  22    0.26    1.84
  -4   1 -22    2.07    1.35
   4  -1  22    1.56    2.18
   4   0 -22    4.05    1.86
  -4   0  22    2.16    1.95
   3   0 -22    1.23    1.72
  -3   0  22    6.02    2.13
   2   0 -22   -2.88    1.53
  -2   0  22   -1.51    1.84
   1   0 -22   17.40    2.12
  -1   0  22   15.45    2.35
   0   0 -22   40.25    2.73
   0   0  22   35.17    2.93
  -1   0 -22   19.87    2.11
   1   0  22   16.45    2.21
   1   0  22   19.38    2.07
  -2   0 -22    1.22    1.44
   2   0  22   -0.37    1.69
  -3   0 -22    1.29    1.39
   3   0  22    3.18    1.98
  -4   0 -22    2.10    1.32
   4   0  22    3.23    2.19
   4  -1 -22    1.60    1.80
  -4   1  22    2.98    1.92
   3  -1 -22    1.75    1.74
  -3   1  22    1.25    1.91
   2  -1 -22    5.10    1.81
  -2   1  22    4.73    2.05
   1  -1 -22    3.91    1.71
  -1   1  22    5.81    1.89
   0   1  22   47.21    3.07
   1   1  22    4.42    1.75
   1   1  22    9.61    1.80
   2   1  22    6.18    1.92
   3   1  22    3.46    1.97
   4   1  22    4.42    2.19
   4  -2 -22    0.81    1.81
  -4   2  22   -0.51    1.74
   3  -2 -22    1.25    1.71
  -3   2  22    4.24    2.02
   2  -2 -22   13.89    2.06
  -2   2  22    8.79    2.21
  -1   2  22    8.59    2.00
   0   2  22    0.38    1.72
   1   2  22   13.83    2.14
   1   2  22    9.74    1.78
   2   2  22   17.24    2.33
   3   2  22    1.70    1.82
   4   2  22   -4.55    1.97
   4  -3 -22    3.26    1.88
  -4   3  22    0.15    1.88
   3  -3 -22    1.68    1.73
  -3   3  22    3.96    2.01
   2  -3 -22    7.77    1.99
  -2   3  22    8.32    2.25
  -1   3  22    6.13    2.01
   0   3  22    3.39    1.49
   0   3  22    2.08    1.84
   1   3  22    6.42    1.88
   1   3  22    5.83    1.80
   2   3  22    8.57    2.01
   3   3  22    2.28    2.01
   4   3  22   -1.46    2.06
   4  -4 -22   12.50    2.12
  -4   4  22    8.72    2.15
   3  -4 -22    9.70    2.03
  -3   4  22   11.07    2.25
  -2   4  22   11.75    2.28
  -1   4  22   -1.78    1.74
   0   4  22    1.96    1.58
   0   4  22    4.34    1.90
   1   4  22    1.63    1.75
   1   4  22    1.68    1.69
   2   4  22    8.80    2.11
   3   4  22   13.54    2.51
   4   4  22    9.49    2.47
  -4   5  22    4.31    1.96
  -3   5  22    0.40    1.95
  -2   5  22    7.07    2.27
  -1   5  22   20.13    2.60
   0   5  22   -0.54    1.54
   0   5  22   -1.03    1.80
   1   5  22   18.20    2.38
   1   5  22   21.36    2.52
   2   5  22    8.96    2.16
   3   5  22    1.53    2.12
  -3   6  22    2.03    1.98
  -2   6  22   17.31    2.49
  -1   6  22   -0.20    1.92
   0   6  22    0.35    1.84
   0   6  22    1.69    1.72
   1   6  22    2.89    1.92
   1   6  22    1.51    1.79
   2   6  22   11.56    2.26
   3   6  22    0.94    2.11
  -3   7  22    1.53    2.01
  -2   7  22    5.17    2.22
  -1   7  22   13.13    2.43
   0   7  22    1.43    1.77
   0   7  22    0.98    1.95
   1   7  22    8.04    2.13
   1   7  22    6.93    2.08
   2   7  22    2.93    2.11
   3   7  22    6.88    2.43
  -2   8  22   10.52    2.34
  -1   8  22    7.62    2.35
   0   8  22    0.50    2.00
   0   8  22   -3.88    1.72
   1   8  22    6.34    2.25
   1   8  22    5.88    2.14
   2   8  22    8.22    2.23
  -2   9  22    0.61    2.11
  -1   9  22    6.00    2.23
   0   9  22    1.99    1.95
   0   9  22    1.13    2.05
   1   9  22    6.40    2.10
   1   9  22    3.39    2.15
   2   9  22    1.52    2.23
   0  10  22    1.30    2.00
   0   9 -23    4.49    1.94
   2   8 -23    4.06    2.04
  -2  -8  23    3.42    2.22
   1   8 -23    2.40    1.87
  -1  -8  23    2.24    2.06
   0   8 -23    1.23    1.76
   0  -8  23   -1.46    1.84
  -1   8 -23    5.05    1.79
   2   7 -23    4.65    2.00
  -2  -7  23    0.38    2.05
   1   7 -23    5.81    1.98
  -1  -7  23    7.12    2.14
   0   7 -23   10.91    2.07
   0  -7  23   13.17    2.39
  -1   7 -23    8.09    1.84
  -2   7 -23    3.15    1.63
   3   6 -23   11.72    2.27
  -3  -6  23   10.61    2.46
   2   6 -23    4.34    1.91
  -2  -6  23    6.18    2.20
   1   6 -23    3.41    1.76
  -1  -6  23    3.57    2.00
   0   6 -23    0.88    1.70
   0  -6  23   -0.29    1.81
  -1   6 -23    0.19    1.54
  -2   6 -23    5.32    1.71
  -3   6 -23   15.47    1.95
   3   5 -23   -0.93    1.74
  -3  -5  23    1.07    2.15
   2   5 -23    2.51    1.89
  -2  -5  23    2.88    2.03
   1   5 -23    2.20    1.85
  -1  -5  23   -0.58    1.87
   0   5 -23   39.44    2.91
   0  -5  23   39.65    3.02
  -1   5 -23    0.55    1.63
  -2   5 -23   -1.14    1.47
  -3   5 -23   -0.34    1.39
   3   4 -23   17.51    2.37
  -3  -4  23   19.22    2.63
   2   4 -23    2.12    1.83
  -2  -4  23    0.76    2.01
   1   4 -23   14.76    2.17
  -1  -4  23   15.92    2.44
   0   4 -23   16.85    2.20
   0  -4  23   17.02    2.41
  -1   4 -23   17.79    2.17
   1  -4  23   15.24    2.24
  -2   4 -23    3.84    1.57
  -3   4 -23   18.61    2.05
   3   3 -23   -0.03    1.82
  -3  -3  23   -0.42    2.00
   2   3 -23    2.10    1.75
  -2  -3  23   -0.25    1.94
   1   3 -23    6.13    1.89
  -1  -3  23    8.10    2.18
   0   3 -23    8.16    1.91
   0  -3  23   13.85    2.30
  -1   3 -23    6.36    1.74
   1  -3  23    5.95    1.84
  -2   3 -23    4.94    1.63
  -3   3 -23    1.89    1.43
  -4  -2  23    0.99    1.95
   3   2 -23    6.33    1.95
  -3  -2  23    5.74    2.19
   2   2 -23   14.29    2.23
  -2  -2  23   19.46    2.61
   1   2 -23    3.66    1.76
  -1  -2  23    4.74    2.00
   0   2 -23    7.33    1.82
   0  -2  23    3.97    1.95
  -1   2 -23    6.21    1.74
   1  -2  23    2.03    1.78
  -2   2 -23   18.53    2.11
  -3   2 -23    8.71    1.69
   4   1 -23    2.17    1.85
  -4  -1  23    1.07    1.93
   3   1 -23   10.40    2.09
  -3  -1  23    5.65    2.18
   2   1 -23   -0.46    1.68
  -2  -1  23    6.42    2.18
   1   1 -23   40.09    2.90
  -1  -1  23   42.25    3.13
   0   1 -23    3.75    1.68
   0  -1  23    5.22    1.90
  -1   1 -23   41.40    2.78
   1  -1  23   42.62    3.02
  -2   1 -23    0.83    1.46
   2  -1  23    4.29    1.83
  -3   1 -23   12.76    1.82
   3  -1  23    9.26    2.24
  -4   1 -23    1.75    1.35
   4  -1  23    1.30    2.21
   4   0 -23   -0.49    1.80
  -4   0  23   -3.67    1.83
   3   0 -23   -3.62    1.61
  -3   0  23    0.24    1.99
   2   0 -23    7.99    2.01
  -2   0  23    7.96    2.25
   1   0 -23   40.74    2.86
  -1   0  23   36.74    3.06
   0   0 -23    0.79    1.57
   0   0  23   -0.60    1.77
  -1   0 -23   42.39    2.81
   1   0  23   43.53    3.00
   1   0  23   46.37    2.86
  -2   0 -23    7.27    1.71
   2   0  23    8.23    1.95
  -3   0 -23    2.12    1.47
   3   0  23   -0.55    1.95
  -4   0 -23    0.52    1.36
   4   0  23    0.37    2.17
   4  -1 -23    1.05    1.80
  -4   1  23    4.44    2.09
   3  -1 -23   10.51    2.06
  -3   1  23    8.05    2.19
   2  -1 -23    2.51    1.77
  -2   1  23    2.75    2.04
   1  -1 -23   38.58    2.85
  -1   1  23   37.69    3.07
   0  -1 -23    4.58    1.75
   0   1  23    2.96    1.86
   1   1  23   34.62    2.68
   1   1  23   40.69    2.92
   2   1  23   -1.05    1.68
   3   1  23   13.52    2.44
   4   1  23    3.48    2.29
   4  -2 -23    2.31    1.86
  -4   2  23    1.14    1.92
   3  -2 -23   11.36    2.07
  -3   2  23    4.40    2.03
   2  -2 -23   17.43    2.27
  -2   2  23   17.90    2.50
   1  -2 -23    9.00    1.96
  -1   2  23   -0.54    1.85
   0   2  23    7.10    2.21
   1   2  23    5.56    1.76
   1   2  23    5.25    1.85
   2   2  23   18.91    2.44
   3   2  23    7.34    2.18
   4   2  23    0.12    2.02
   3  -3 -23   -1.40    1.75
  -3   3  23    0.07    1.96
   2  -3 -23    3.11    1.82
  -2   3  23    3.79    2.14
  -1   3  23    2.40    1.93
   0   3  23   10.62    2.29
   1   3  23    4.57    1.76
   1   3  23    1.90    1.83
   2   3  23    1.06    1.85
   3   3  23    1.02    2.07
   3  -4 -23   16.43    2.26
  -3   4  23   11.34    2.39
  -2   4  23    1.61    1.97
  -1   4  23   13.73    2.44
   0   4  23    6.48    2.03
   1   4  23    7.32    1.97
   1   4  23   15.68    2.42
   2   4  23    1.89    1.95
   3   4  23   10.82    2.35
   3  -5 -23    0.05    1.89
  -3   5  23    2.97    2.07
  -2   5  23   -0.15    2.01
  -1   5  23   -1.55    1.82
   0   5  23   40.15    3.14
   1   5  23    3.49    1.88
   1   5  23    2.91    1.92
   2   5  23    5.19    2.08
   3   5  23   -1.77    1.97
  -3   6  23    7.96    2.32
  -2   6  23    5.83    2.28
  -1   6  23   -1.11    1.88
   0   6  23    0.72    1.93
   1   6  23    2.37    1.87
   1   6  23    3.25    1.99
   2   6  23    3.51    2.12
   3   6  23    7.55    2.37
  -2   7  23    3.26    2.25
  -1   7  23    4.36    2.06
   0   7  23    6.40    2.15
   1   7  23    2.31    2.02
   1   7  23    5.85    2.13
   2   7  23    2.95    2.05
  -2   8  23    4.95    2.29
  -1   8  23   -1.07    2.07
   0   8  23   -0.50    1.96
   1   8  23   -0.63    2.00
   1   8  23    5.68    2.18
   0   9  23    5.48    2.24
   0   8 -24   -1.86    1.67
   1   7 -24    3.07    1.84
  -1  -7  24    0.90    2.12
   0   7 -24    6.81    1.94
   0  -7  24    4.11    2.04
  -1   7 -24    3.29    1.67
   2   6 -24    2.51    1.91
  -2  -6  24    1.46    2.14
   1   6 -24    0.21    1.76
  -1  -6  24    0.96    1.98
   0   6 -24    0.11    1.68
   0  -6  24    0.91    1.96
  -1   6 -24    3.26    1.69
  -2   6 -24    3.47    1.63
   2   5 -24    8.51    2.11
  -2  -5  24    5.51    2.18
   1   5 -24    2.72    1.87
  -1  -5  24    4.34    2.09
   0   5 -24    7.94    1.97
   0  -5  24    6.73    2.09
  -1   5 -24    5.45    1.82
  -2   5 -24    5.82    1.77
   3   4 -24    7.21    2.11
  -3  -4  24    8.02    2.42
   2   4 -24    0.63    1.78
  -2  -4  24   -4.27    1.88
   1   4 -24   23.30    2.53
  -1  -4  24   20.38    2.64
   0   4 -24    5.30    1.84
   0  -4  24    1.73    1.86
  -1   4 -24   25.26    2.45
  -2   4 -24   -0.66    1.49
  -3   4 -24   12.83    1.87
   3   3 -24    0.94    1.87
  -3  -3  24    1.96    2.22
   2   3 -24    0.09    1.74
  -2  -3  24    4.35    2.12
   1   3 -24    2.90    1.72
  -1  -3  24    1.02    1.97
   0   3 -24   -1.03    1.57
   0  -3  24   -0.63    1.86
  -1   3 -24    0.61    1.64
  -2   3 -24    4.54    1.70
  -3   3 -24    1.07    1.44
   3   2 -24    2.22    1.85
  -3  -2  24    0.81    2.16
   2   2 -24    3.00    1.88
  -2  -2  24    3.56    2.11
   1   2 -24    4.87    1.84
  -1  -2  24    4.49    1.97
   0   2 -24    6.41    1.86
   0  -2  24    8.20    2.21
  -1   2 -24    2.56    1.70
   1  -2  24   -0.69    1.75
  -2   2 -24    4.27    1.68
  -3   2 -24   -0.19    1.38
   3   1 -24   10.84    2.17
  -3  -1  24    8.41    2.39
   2   1 -24   16.02    2.28
  -2  -1  24   13.24    2.48
   1   1 -24    4.84    1.84
  -1  -1  24    1.36    1.86
   0   1 -24    5.12    1.83
   0  -1  24   -0.84    1.82
  -1   1 -24    2.15    1.62
   1  -1  24    4.51    1.92
  -2   1 -24   15.98    2.04
  -3   1 -24   15.57    1.95
   3  -1  24   12.31    2.42
   3   0 -24    0.16    1.80
  -3   0  24   -1.91    2.01
   2   0 -24    0.27    1.73
  -2   0  24   -0.78    2.09
   1   0 -24    0.66    1.67
  -1   0  24    2.40    1.99
   0   0 -24    3.10    1.74
   0   0  24    4.30    2.02
  -1   0 -24    0.80    1.56
   1   0  24    0.86    1.73
  -2   0 -24    0.25    1.50
   2   0  24    2.41    1.88
  -3   0 -24   -1.53    1.37
   3   0  24   -0.84    1.96
   3  -1 -24    8.88    2.04
  -3   1  24    6.91    2.21
   2  -1 -24   16.08    2.28
  -2   1  24   12.97    2.46
   1  -1 -24    2.43    1.78
  -1   1  24    4.47    1.97
   0  -1 -24    2.72    1.73
   0   1  24    1.24    1.86
  -1  -1 -24    3.38    1.73
   1   1  24    1.93    1.88
   2   1  24   19.16    2.42
   3   1  24    9.63    2.26
   3  -2 -24   -3.24    1.70
  -3   2  24    0.43    2.01
   2  -2 -24    5.40    1.95
  -2   2  24    3.77    2.10
   1  -2 -24    2.44    1.81
  -1   2  24    3.77    1.99
   0   2  24    5.11    1.99
   1   2  24    0.70    1.90
   2   2  24    2.51    1.84
   3   2  24    0.45    2.03
   3  -3 -24    5.37    2.01
  -3   3  24   -0.95    2.00
   2  -3 -24    3.56    1.92
  -2   3  24    3.22    2.08
  -1   3  24    0.72    1.87
   0   3  24   -2.54    1.82
   1   3  24    1.19    1.87
   2   3  24    4.62    1.98
   3   3  24   -2.56    1.96
   3  -4 -24    5.88    2.11
  -3   4  24    8.50    2.33
  -2   4  24    0.36    2.07
  -1   4  24   18.91    2.69
   0   4  24    4.79    2.08
   1   4  24   22.75    2.72
   2   4  24   -2.53    1.83
   3   4  24    3.69    2.26
  -2   5  24    2.34    2.22
  -1   5  24   -1.03    1.94
   0   5  24    2.04    1.91
   1   5  24    3.87    2.05
   1   5  24    3.37    1.93
   2   5  24    3.28    2.11
  -2   6  24    2.69    2.21
  -1   6  24    3.00    2.10
   0   6  24   -1.28    1.94
   1   6  24    1.11    1.85
   1   6  24    1.49    2.02
   2   6  24    3.00    2.05
  -1   7  24    2.07    2.06
   0   7  24    3.48    2.07
   1   7  24    1.11    1.99
   1   7  24   -0.42    1.95
   0   8  24   -1.67    1.99
   1   6 -25    0.70    1.73
  -1  -6  25    1.81    2.14
   0   6 -25    0.36    1.77
   0  -6  25    4.12    2.11
  -1   6 -25    2.32    1.77
   1   5 -25    1.44    1.85
  -1  -5  25   -0.82    1.99
   0   5 -25    4.70    1.93
   0  -5  25    2.13    2.03
  -1   5 -25    2.45    1.72
   2   4 -25   11.44    2.28
  -2  -4  25    6.56    2.32
   1   4 -25    4.38    1.94
  -1  -4  25    3.66    2.12
   0   4 -25    1.96    1.72
   0  -4  25   -2.95    1.83
  -1   4 -25    7.32    1.86
  -2   4 -25    9.44    1.95
   2   3 -25    7.11    2.04
  -2  -3  25    4.07    2.19
   1   3 -25    2.48    1.88
  -1  -3  25   -0.63    1.96
   0   3 -25   -1.48    1.61
   0  -3  25    1.08    1.97
  -1   3 -25    2.42    1.69
  -2   3 -25    6.15    1.77
   2   2 -25    0.29    1.81
  -2  -2  25    0.59    2.05
   1   2 -25   12.97    2.21
  -1  -2  25   10.05    2.45
   0   2 -25    6.70    1.96
   0  -2  25    3.44    1.97
  -1   2 -25    8.57    1.94
  -2   2 -25    5.04    1.72
   2   1 -25    5.18    1.98
  -2  -1  25    2.52    2.12
   1   1 -25   -1.94    1.66
  -1  -1  25   -1.55    1.97
   0   1 -25   -1.86    1.57
   0  -1  25   -3.60    1.80
  -1   1 -25   -2.03    1.51
  -2   1 -25    3.10    1.64
   2   0 -25    1.48    1.83
  -2   0  25    0.97    2.04
   1   0 -25    0.56    1.77
  -1   0  25   -3.88    1.80
   0   0 -25   -0.06    1.61
   0   0  25    0.92    1.91
  -1   0 -25   -2.75    1.52
  -2   0 -25   -0.67    1.49
   2  -1 -25    4.72    1.96
  -2   1  25    5.21    2.23
   1  -1 -25    1.92    1.81
  -1   1  25   -2.69    1.87
   0  -1 -25    1.23    1.65
   0   1  25   -0.01    1.95
  -1  -1 -25    0.02    1.70
  -2  -1 -25    3.69    1.74
   2  -2 -25    5.20    2.00
  -2   2  25    1.43    2.15
   1  -2 -25   10.14    2.09
  -1   2  25    2.79    2.10
   0  -2 -25    8.46    2.02
   0   2  25    5.74    2.13
   1   2  25   10.49    2.36
   2  -3 -25    8.13    2.13
  -2   3  25    9.02    2.38
   1  -3 -25    2.76    1.93
  -1   3  25   -0.93    2.06
   0   3  25    1.40    2.04
   1   3  25   -0.39    1.89
   2   3  25    2.02    2.00
   2  -4 -25    5.32    2.11
  -2   4  25   12.44    2.52
  -1   4  25    1.86    2.09
   0   4  25    0.61    1.96
   1   4  25    1.07    1.98
   2   4  25    7.95    2.17
  -1   5  25    0.62    2.05
   0   5  25    0.93    2.07
   1   5  25    0.16    1.94
  -1   6  25    0.71    2.05
   0   6  25    0.67    2.06
   1   6  25    0.45    2.05
  -1  -4  26   10.29    2.51
   0   4 -26    7.85    1.99
   0  -4  26    2.19    2.14
   1   3 -26    3.42    1.96
  -1  -3  26    2.04    2.09
   0   3 -26    1.40    1.79
   0  -3  26   -1.77    1.97
  -1   3 -26    5.20    1.90
   1   2 -26    8.33    2.10
  -1  -2  26    5.66    2.23
   0   2 -26   33.58    2.88
   0  -2  26   22.67    2.82
  -1   2 -26    8.40    1.97
  -2  -1  26   11.64    2.57
   1   1 -26   16.66    2.37
  -1  -1  26   18.44    2.80
   0   1 -26    0.51    1.74
   0  -1  26   -1.71    1.96
  -1   1 -26   28.05    2.67
   2   0 -26    0.69    1.89
  -2   0  26    1.96    2.17
   1   0 -26    1.54    1.84
  -1   0  26    1.92    2.15
   0   0 -26   31.62    2.80
   0   0  26   33.54    3.13
  -1   0 -26    2.15    1.76
  -2   0 -26    0.54    1.62
  -2   1  26    3.13    2.24
   1  -1 -26   20.73    2.51
  -1   1  26   22.79    2.98
   0  -1 -26    2.94    1.87
   0   1  26    3.63    2.19
  -1  -1 -26   23.58    2.52
   1  -2 -26    3.22    1.99
  -1   2  26    3.52    2.24
   0  -2 -26   27.71    2.76
   0   2  26   31.99    3.09
   1  -3 -26    3.28    1.99
  -1   3  26    6.26    2.34
   0   3  26    1.39    2.00
  -1   4  26    4.35    2.28
   0   4  26    6.80    2.33
   0   0   0    0.00    0.00
;
_shelx_res_checksum               38740
_shelx_res_file
;
TITL ca110413_0m in P212121 #19
CELL 0.71073 6.1403 13.6569 20.7189 90 90 90
ZERR 4 0.001 0.0027 0.0038 0 0 0
LATT -1
SYMM 0.5-X,-Y,0.5+Z
SYMM 0.5+X,0.5-Y,-Z
SYMM -X,0.5+Y,0.5-Z

SFAC C H N O S Cl
UNIT 56 72 4 32 4 4

L.S. 4
PLAN  20
SIZE 0.02 0.06 0.4
TEMP -173.11
HTAB
REM reset to P212121 #19
BOND
fmap 2
acta
REM <HKL>D:/SMoCC_Strukturen/ca110413/work/ca110413_0m.hkl</HKL>

WGHT    0.032900    0.191700
FVAR       0.20246
CL1   6    0.335287    0.552466    0.591837    11.00000    0.03837    0.03300 =
         0.02476   -0.00373   -0.01089    0.00866
S1    5    0.435623    0.539631    0.328983    11.00000    0.02555    0.01665 =
         0.02084    0.00382    0.00641   -0.00021
O1    4    0.912946    0.228131    0.131460    11.00000    0.04941    0.03951 =
         0.02594   -0.01676    0.01594   -0.01724
O2    4    1.137849    0.221012    0.211347    11.00000    0.02451    0.05496 =
         0.06490   -0.03312    0.00192    0.00782
O3    4    0.299845    0.588348    0.283480    11.00000    0.03852    0.02852 =
         0.02594    0.01490    0.00915    0.01309
O4    4    0.565459    0.592247    0.373887    11.00000    0.03122    0.02115 =
         0.03119   -0.00670    0.01103   -0.00924
O5    4    0.272284    0.472138    0.367997    11.00000    0.01661    0.02023 =
         0.01497    0.00372   -0.00068   -0.00112
O6    4    0.477288    0.277203    0.466209    11.00000    0.03159    0.02515 =
         0.03073    0.01050    0.00021    0.00511
O7    4    0.378339    0.288179    0.361584    11.00000    0.03319    0.01323 =
         0.02484    0.00043    0.00707    0.00133
O8    4   -0.030336    0.380140    0.447704    11.00000    0.02768    0.02298 =
         0.02523    0.00574    0.00293   -0.00890
AFIX 147
H8    2   -0.062424    0.333504    0.472368    11.00000   -1.50000
AFIX   0
N1    3    0.973296    0.251120    0.185630    11.00000    0.02972    0.03184 =
         0.03421   -0.01483    0.01654   -0.00994
C1    1    0.597676    0.455092    0.286375    11.00000    0.01880    0.01840 =
         0.01882    0.00067    0.00635   -0.00387
C2    1    0.803039    0.434050    0.308085    11.00000    0.02492    0.02819 =
         0.02247   -0.00747   -0.00048   -0.00383
AFIX  43
H2    2    0.860287    0.466525    0.344913    11.00000   -1.20000
AFIX   0
C3    1    0.926026    0.364885    0.275683    11.00000    0.01988    0.03217 =
         0.03094   -0.01252   -0.00058    0.00112
AFIX  43
H3    2    1.067477    0.347655    0.290382    11.00000   -1.20000
AFIX   0
C4    1    0.837945    0.321507    0.221414    11.00000    0.02150    0.02241 =
         0.02330   -0.00454    0.00706   -0.00552
C5    1    0.631984    0.341729    0.199508    11.00000    0.03190    0.03531 =
         0.01076   -0.00551    0.00068   -0.00670
AFIX  43
H5    2    0.575135    0.309631    0.162482    11.00000   -1.20000
AFIX   0
C6    1    0.509616    0.409860    0.232631    11.00000    0.02153    0.03329 =
         0.01829    0.00081   -0.00122   -0.00198
AFIX  43
H6    2    0.366414    0.425567    0.218699    11.00000   -1.20000
AFIX   0
C7    1    0.339526    0.428515    0.428516    11.00000    0.02076    0.01491 =
         0.01889    0.00427   -0.00064   -0.00001
AFIX  13
H7    2    0.463866    0.466712    0.446894    11.00000   -1.20000
AFIX   0
C8    1    0.407090    0.322616    0.420120    11.00000    0.01820    0.02103 =
         0.02529    0.00291    0.00501   -0.00279
C9    1    0.144954    0.434088    0.474553    11.00000    0.02458    0.01838 =
         0.01502    0.00442    0.00225   -0.00130
AFIX  13
H9    2    0.187061    0.403354    0.516546    11.00000   -1.20000
AFIX   0
C10   1    0.068723    0.537947    0.487403    11.00000    0.02204    0.02077 =
         0.01757    0.00038    0.00341    0.00190
AFIX  23
H10A  2    0.019606    0.566513    0.445970    11.00000   -1.20000
H10B  2   -0.059759    0.534741    0.516192    11.00000   -1.20000
AFIX   0
C11   1    0.231680    0.607044    0.517162    11.00000    0.02561    0.02501 =
         0.01395    0.00276   -0.00154    0.00107
AFIX  13
H11   2    0.355835    0.615864    0.486473    11.00000   -1.20000
AFIX   0
C12   1    0.136983    0.706131    0.532662    11.00000    0.02875    0.02248 =
         0.02331   -0.00446    0.00080    0.00249
AFIX 137
H12A  2    0.002070    0.697830    0.557333    11.00000   -1.50000
H12B  2    0.105534    0.741177    0.492453    11.00000   -1.50000
H12C  2    0.241783    0.743802    0.558275    11.00000   -1.50000
AFIX   0
C13   1    0.435315    0.184992    0.350280    11.00000    0.04970    0.01539 =
         0.03711   -0.00061    0.01738    0.00665
AFIX  23
H13A  2    0.564877    0.167505    0.376279    11.00000   -1.20000
H13B  2    0.471719    0.175287    0.304173    11.00000   -1.20000
AFIX   0
C14   1    0.247602    0.119667    0.368517    11.00000    0.06523    0.02212 =
         0.05089   -0.00663    0.02041   -0.00677
AFIX 137
H14A  2    0.120665    0.135947    0.341930    11.00000   -1.50000
H14B  2    0.211820    0.129411    0.414164    11.00000   -1.50000
H14C  2    0.288148    0.051125    0.361329    11.00000   -1.50000
AFIX   0
HKLF 4

REM  ca110413_0m in P212121 #19
REM R1 =  0.0403 for    3078 Fo > 4sig(Fo)  and  0.0649 for all    3963 data
REM    229 parameters refined using      0 restraints

END

WGHT      0.0329      0.1917

REM Instructions for potential hydrogen bonds
EQIV $1 x-1/2, -y+1/2, -z+1
HTAB O8 O6_$1
EQIV $2 x+1, y, z
HTAB C2 O5_$2
HTAB C2 O8_$2
HTAB C3 O5_$2
HTAB C3 O7_$2
EQIV $3 -x+1/2, -y+1, z-1/2
HTAB C6 Cl1_$3
EQIV $4 -x+1, y+1/2, -z+1/2
HTAB C12 O1_$4
EQIV $5 -x+3/2, -y+1, z+1/2
HTAB C12 O1_$5
EQIV $6 -x+1, y-1/2, -z+1/2
HTAB C13 O3_$6

REM Highest difference peak  0.209,  deepest hole -0.376,  1-sigma level  0.059
Q1    1   0.7077  0.4567  0.2954  11.00000  0.05    0.21
Q2    1   1.0442  0.3730  0.2732  11.00000  0.05    0.21
Q3    1   0.2172  0.6572  0.2301  11.00000  0.05    0.20
Q4    1   0.4219  0.5187  0.6806  11.00000  0.05    0.20
Q5    1   0.1357  0.5008  0.2876  11.00000  0.05    0.20
Q6    1   0.6056  0.5641  0.2941  11.00000  0.05    0.20
Q7    1   0.7637  0.3608  0.2000  11.00000  0.05    0.20
Q8    1   0.2591  0.4591  0.5926  11.00000  0.05    0.20
Q9    1   0.4579  0.6730  0.2726  11.00000  0.05    0.19
Q10   1   0.4585  0.5817  0.3653  11.00000  0.05    0.19
Q11   1   0.4148  0.5824  0.2943  11.00000  0.05    0.19
Q12   1   0.6451  0.1937  0.1183  11.00000  0.05    0.19
Q13   1   0.4456  0.4994  0.2961  11.00000  0.05    0.19
Q14   1   0.5957  0.5766  0.5305  11.00000  0.05    0.19
Q15   1   0.6627  0.3176  0.2261  11.00000  0.05    0.19
Q16   1   0.8045  0.6041  0.3971  11.00000  0.05    0.19
Q17   1   0.4374  0.5829  0.5933  11.00000  0.05    0.19
Q18   1  -0.0550  0.5423  0.4383  11.00000  0.05    0.18
Q19   1   0.4834  0.6680  0.4281  11.00000  0.05    0.18
Q20   1  -0.2438  0.5918  0.5426  11.00000  0.05    0.18
;
_shelx_space_group_comment
;
The symmetry employed for this shelxl refinement is uniquely defined
by the following loop, which should always be used as a source of
symmetry information in preference to the above space-group names.
They are only intended as comments.
;
_shelxl_version_number            2012-9
